# Supplementary material for: Palladium-catalyzed and norbornene-mediated C–H amination and C–O alkenylation of aryl triflates
Source: Royal Society of Chemistry journal article supplement (doi:10.1039/d3ob00260h), 2023-01-01
Supplement: d3ob00260h1.pdf [file d3ob00260h1.pdf]

# Supporting Information

## Palladium-catalyzed and Norbornene-mediated C-H Amination and C-O Alkenylation of Aryl Triflates

Shuo Zhang, Lei Yang, Jianbin Fu, Qihang Tan, Kuan Liu, Tianzeng Huang,\* Chunya Li, Long Liu,  
and Tieqiao Chen\*

Key Laboratory of Ministry of Education for Advanced Materials in Tropical Island Resources,  
Hainan Provincial Key Lab of Fine Chem, Hainan Provincial Fine Chemical Engineering  
Research Center, Hainan University, Haikou, 570228, China.  
E-mail: huangtianzeng505@163.com; chentieqiao@hnu.edu.cn.

### Table of contents

|                                                                                                                                                |                  |
|------------------------------------------------------------------------------------------------------------------------------------------------|------------------|
| <b>1. General Information</b>                                                                                                                  | <b>(S1)</b>      |
| <b>2. General procedure for the preparation of compound 1, 2, NBEs, 4 and 4a</b>                                                               | <b>(S1-S5)</b>   |
| <b>3. <i>E/Z</i> structure ratio calculation (4ad)</b>                                                                                         | <b>(S6-S9)</b>   |
| <b>4. Characterization data for the compound 1, 2, NBEs and 4</b>                                                                              | <b>(S10-S41)</b> |
| <b>5. <sup>1</sup>H, <sup>13</sup>C NMR spectra for the compound 1, 2, NBEs and 4; HRMS of 4, GC of 4a, entry 31 and GC-MS of 4 (S42-S128)</b> |                  |

## 1. General Information

**General experimental methods:** The reactions were carried out in Schlenk tubes of 10 mL under N<sub>2</sub> atmosphere. For reactions that require heating, heating mantle was used as the heat source. All solvents were purified according to standard operation procedures. All solvents and reagents were purchased from Tansoole, Meryer, Heowns, Energy Chemical, Alfa Aesar, and Aladdin. Column chromatography was performed using Silica Gel 60 (300-400 mesh). The reactions were monitored by GC and GC-MS, GC-MS results were recorded on GC-MS QP2010, and GC analysis was performed on GC 2014. The <sup>1</sup>H, <sup>13</sup>C NMR spectra were recorded on a Bruker ADVANCE III spectrometer at 400 MHz, 100 MHz respectively, and chemical shifts were reported in parts per million (ppm). The electron ionization (EI) method was used as the ionization method for the HRMS measurement, and the mass analyzer type is TOF for EI.

## 2. General procedure for the preparation of compound 1, 2, NBEs and 4

### 2.1 General procedure for the preparation of compound 1 according the literature [1]:

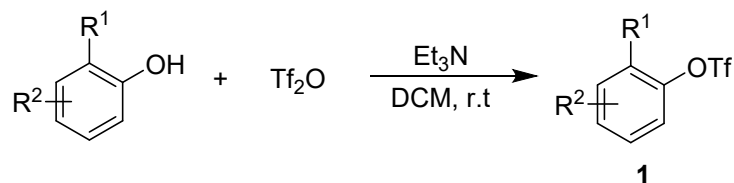

To a stirred solution of phenols (10 mmol) and Et<sub>3</sub>N (2.0 equiv., 2.8 mL) in DCM (50 mL) was slowly added Trifluoromethanesulfonyl anhydride (Tf<sub>2</sub>O) (1.5 equiv., 2.5 mL) at 0 °C. Then the mixture was warmed up to room temperature and stirred for overnight. The reaction was monitored by TLC. The reaction mixture was quenched with water and extracted with EtOAc (25 mL x 3). The combined organic layer was washed with brine, dried over Na<sub>2</sub>SO<sub>4</sub>, filtered and concentrated under vacuum. The crude product was purified by silica gel on column chromatography, eluting with petroleum ether/EtOAc.

### 2.2 General procedure for the preparation of compound 2 according the literature [2]:

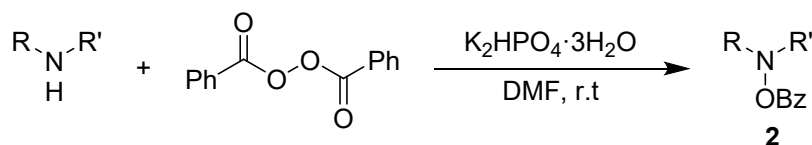

A 100 mL, one-necked, round-bottomed flask equipped with a Teflon-coated magnetic stir bar

was charged with benzoyl peroxide (1.211 g, 5 mmol),  $K_2HPO_4 \cdot 3H_2O$  (1.71 g, 7.5 mmol), and DMF (12.5 mL) under  $N_2$  atmosphere. The suspension was stirred at 0 °C and the amine (5 mmol) was added via syringe in one portion. After then, the reaction mixture was warmed up to room temperature and stirred for the indicated reaction time according to TLC. Water (25 mL) was added and the contents were stirred vigorously for several minutes until all solids dissolved. The reaction mixture was transferred to a 100 mL separator funnel and extracted with EtOAc (25 mL x 3). The combined organic layer was washed with brine, dried over  $Na_2SO_4$ , filtered and concentrated under vacuum. The crude product was purified by silica gel on column chromatography, eluting with petroleum ether/EtOAc, to afford the desired product **2** and stored it in fridge for further usage.

### 2.3 General procedure for the preparation of compound NBEs

**N**<sup>1</sup>, **N**<sup>2</sup>, **N**<sup>3</sup>, **N**<sup>4</sup>, **N**<sup>5</sup>, **N**<sup>6</sup> were purchased from Meryer (Shanghai) Chemical Technology Co., Ltd.

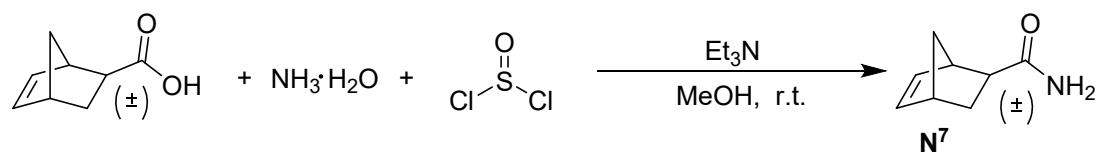

A 100 mL, one-necked, round-bottomed flask equipped with a Teflon-coated magnetic stir bar was charged with 5-Norbornene-2-carboxaldehyde (0.69 g/0.61 mL, 5 mmol), Ammonium hydroxide (0.51 mL, 7.5 mmol), triethylamine (1.01 g/1.39 mL, 10 mmol) and MeOH (50.0 mL). The suspension was stirred at 0 °C and the thionyl chloride (1.19 g/0.73 mL, 10 mmol) was added via syringe in one portion. After then, the reaction mixture was warmed up to room temperature and stirred for the indicated reaction time according to TLC. Water (25 mL) was added and the contents were stirred vigorously for several minutes until all solids dissolved. The reaction mixture was transferred to a 100 mL separator funnel and extracted with EtOAc (25 mL x 3). The combined organic layer was washed with brine, dried over  $Na_2SO_4$ , filtered and concentrated under vacuum. The crude product was purified by silica gel on column chromatography, eluting with petroleum ether/EtOAc, to afford the desired product **N**<sup>7</sup>.

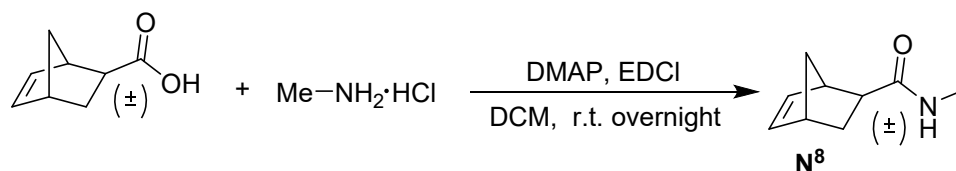

A 100 mL, one-necked, round-bottomed flask equipped with a Teflon-coated magnetic stir bar was charged with 5-Norbornene-2-carboxaldehyde (0.69 g/0.61 mL, 5 mmol), methylamine hydrochloride (0.71 g, 10.5 mmol), DMAP (0.31 g, 2.5 mmol), 1-ethyl-3-(3-dimethylaminopropyl) carbodiimide hydrochloride (1.44 g, 7.5 mmol) and DCM (50.0 mL). After then, the reaction mixture was warmed up to room temperature and stirred for the indicated reaction time according to TLC. Water (25 mL) was added and the contents were stirred vigorously for several minutes until all solids dissolved. The reaction mixture was transferred to a 100 mL separator funnel and extracted with EtOAc (25 mL x 3). The combined organic layer was washed with brine, dried over Na<sub>2</sub>SO<sub>4</sub>, filtered and concentrated under vacuum. The crude product was purified by silica gel on column chromatography, eluting with petroleum ether/EtOAc, to afford the desired product N<sup>8</sup> [17].

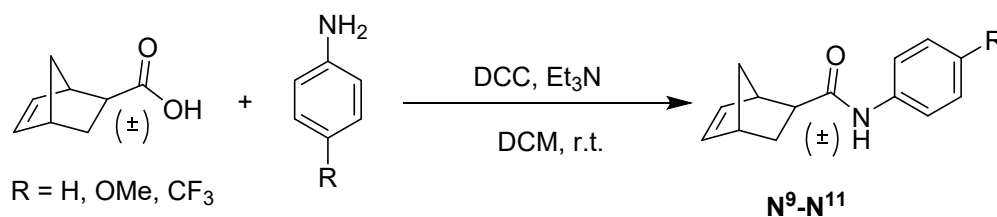

A 100 mL, one-necked, round-bottomed flask equipped with a Teflon-coated magnetic stir bar was charged with 5-Norbornene-2-carboxaldehyde (0.69 g/0.61 mL, 5 mmol), amine (7.5 mmol), triethylamine (1.01 g/1.39 mL, 10 mmol), DCC (1.24g, 2.5 mmol) and DCM (50.0 mL). After then, the reaction mixture was warmed up to room temperature and stirred for the indicated reaction time according to TLC. Water (25 mL) was added and the contents were stirred vigorously for several minutes until all solids dissolved. The reaction mixture was transferred to a 100 mL separator funnel and extracted with EtOAc (25 mL x 3). The combined organic layer was washed with brine, dried over Na<sub>2</sub>SO<sub>4</sub>, filtered and concentrated under vacuum. The crude product was purified by silica gel on column chromatography, eluting with petroleum ether/EtOAc, to afford the desired product N<sup>9</sup>-N<sup>11</sup>



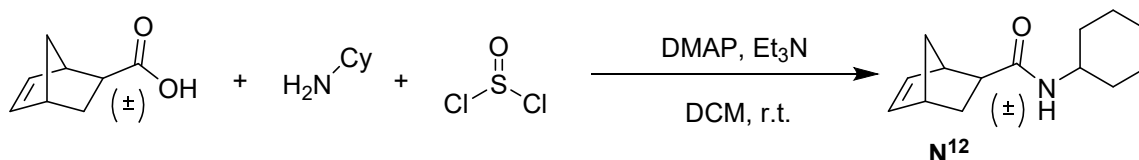

A 100 mL, one-necked, round-bottomed flask equipped with a Teflon-coated magnetic stir bar was charged with 5-Norbornene-2-carboxaldehyde (0.69 g/0.61 mL, 5 mmol), amine (7.5 mmol), triethylamine (1.01 g/1.39 mL, 10 mmol), DMAP (0.31g, 2.5 mmol) and DCM (50.0 mL). The suspension was stirred at 0 °C and the thionyl chloride (1.19 g/0.73 mL, 10 mmol) was added via syringe in one portion. After then, the reaction mixture was warmed up to room temperature and stirred for the indicated reaction time according to TLC. Water (25 mL) was added and the contents were stirred vigorously for several minutes until all solids dissolved. The reaction mixture was transferred to a 100 mL separator funnel and extracted with EtOAc (25 mL x 3). The combined organic layer was washed with brine, dried over Na<sub>2</sub>SO<sub>4</sub>, filtered and concentrated under vacuum. The crude product was purified by silica gel on column chromatography, eluting with petroleum ether/EtOAc, to afford the desired product **N<sup>12</sup>**.

#### 2.4 General procedure for the preparation of compound 4 and 4a1

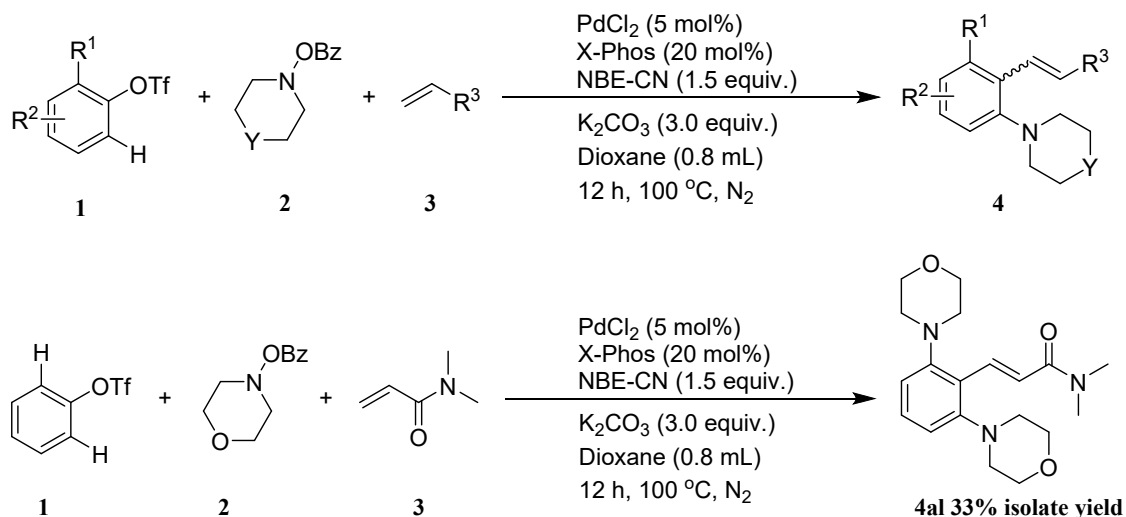

In an oven dried 10 mL Schlenk tube charged with **1** (0.2 mmol), **2** (0.28 mmol), terminal alkene **3** (0.28 mmol), PdCl<sub>2</sub> (1.8 mg, 0.01 mmol), X-Phos (19.1 mg, 0.04 mmol), K<sub>2</sub>CO<sub>3</sub> (82.9 mg, 0.6 mmol), NBE-CN (36.0 μL, 0.3 mmol), and dioxane (0.8 mL) under N<sub>2</sub>. The suspension was stirred at room temperature for 10 min, and then heated to 100 °C for 12 h. The reaction was

monitored by GC-MS. After being cooled to room temperature, the reaction mixture was quenched with water (5 mL) and transferred to a 50 mL of separator funnel and then extracted with EtOAc (10 mL x 3). The organic layer was collected and combined and then washed with brine, dried over Na<sub>2</sub>SO<sub>4</sub>, filtered and concentrated under vacuum. The crude product was purified by silica gel on column chromatography, eluting with petroleum ether/EtOAc, to afford the desired product **4 and 4a**.

### 3. *E/Z* structure ratio calculation (4d)

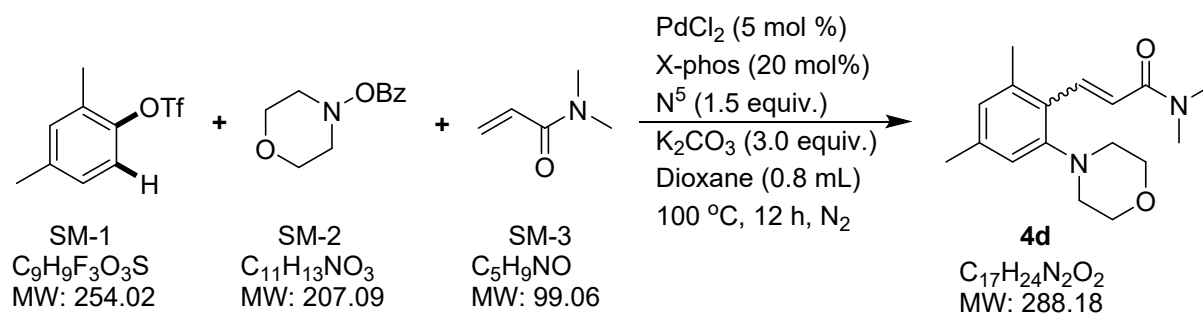

Material:

| Compound    | MW                 | mmol        | Amount                              | Eq.        |
|-------------|--------------------|-------------|-------------------------------------|------------|
| <b>SM-1</b> | <b>254.02</b>      | <b>0.20</b> | <b>50.8 mg/40 <math>\mu</math>L</b> | <b>1.0</b> |
| SM-2        | 207.09             | 0.28        | 57.9 mg                             | 1.4        |
| SM-3        | 99.06 (0.96 g/mL)  | 0.28        | 27.7 mg/29.00 $\mu$ L               | 1.4        |
| $K_2CO_3$   | 138.21             | 0.60        | 82.9 mg                             | 3.0        |
| $N^5$       | 119.16 (0.99 g/mL) | 0.30        | 35.8 mg/36.00 $\mu$ L               | 1.5        |
| $PdCl_2$    | 177.33             | 0.01        | 1.8 mg                              | 0.05       |
| X-phos      | 476.72             | 0.04        | 19.1 mg                             | 0.2        |
| Solvent     | Dioxane            |             | 0.8 mL                              |            |

$c = 0.25$  mmol/mL

In an oven dried 10 mL Schlenk tube charged with **SM-1** (50.08 mg, 0.2 mmol), **SM-2** (57.9 mg, 0.28 mmol), terminal alkene **SM-3** (29.0  $\mu$ L, 0.28 mmol),  $PdCl_2$  (1.8 mg, 0.01 mmol), X-Phos (19.1 mg, 0.04 mmol),  $K_2CO_3$  (82.9 mg, 0.6 mmol), NBE-CN (36.00  $\mu$ L, 0.3 mmol), and dioxane (0.8 mL) under  $N_2$ . The suspension was stirred at room temperature for 10 min, and then heated to 100 °C for 12 h. After the reaction was completed and cooled to room temperature, add internal standard dodecane (30  $\mu$ L) into the reaction solution, and then determine the *Z/E* ratio of the product by GC. The reaction mixture was quenched with water (5 mL) and transferred to a 50 mL of separator funnel and then extracted with EtOAc (10 mL x 3). The organic layer was collected and combined and then washed with brine, dried over  $Na_2SO_4$ , filtered and concentrated under vacuum. The crude product was purified by silica gel on column chromatography, eluting with petroleum ether/EtOAc, to afford the desired product **4d**.

**The proportion of *Z* and *E* components in the target product **4d** mixture was analyzed by gas chromatography with internal standard method:**

This experiment uses dodecane as the internal standard, the target product **4d** was the tested sample. Assume the mass of **4d** in the test sample was  $m_i$  and peak area is  $A_i$ , the total amount of substance in the test sample is  $N(0.2$  mmol), the mass of dodecane added was  $m_s$  and peak area

was  $A_s$ . The calculation formula of the correction factor  $f_i$ :

$$f_i = \frac{n_i A_s}{n_s A_i}$$

Calculate the GC yield formula of product **4d**: GC yield =  $\frac{A_i n_s}{A_s N} \cdot f_i$

| Compound | MW     | Amount                       | Area (GC)    |
|----------|--------|------------------------------|--------------|
| 4d       | 288.18 | $m_i=15.2$ mg                | $A_i=21.231$ |
| dodecane | 170.34 | $m_s=22.60$ mg/30.00 $\mu$ L | $A_s=78.769$ |

The correction factor can be obtained according to the above table:

$$f_i = \frac{n_i A_s}{n_s A_i} = \frac{0.0527(\text{mmol}) \cdot 78.769}{0.1326(\text{mmol}) \cdot 21.231} = 1.47$$

| Compound | MW     | Area (GC)    |
|----------|--------|--------------|
| 4d(E)    | 288.18 | $A_E=26.094$ |
| 4d(Z)    | 288.18 | $A_Z=0.480$  |
| dodecane | 170.34 | $A_s=73.426$ |

$$\text{GC yield of } \mathbf{4d(E)} = \frac{A_i n_s}{A_s N} \cdot f_i \times 100\% = \frac{26.094 \cdot 0.133(\text{mmol})}{73.426 \cdot 0.2(\text{mmol})} \cdot 1.47 \times 100\% = 34.74\%$$

$$\text{GC yield of } \mathbf{4d(Z)} = \frac{A_i n_s}{A_s N} \cdot f_i \times 100\% = \frac{0.480 \cdot 0.133(\text{mmol})}{73.426 \cdot 0.2(\text{mmol})} \cdot 1.47 \times 100\% = 0.63\%$$

$$\mathbf{4d(E):4d(Z)} = \left( \frac{55.14}{56.14} : \frac{1}{56.14} \right) \bullet 100\% \approx 98.2 : 1.8$$

Product 4d GC diagram

SHIMADZU LabSolutions 分析报告

<样品信息>

样品名 :  
 样品ID :  
 数据文件名 : JIAJI校正因子.gcd  
 方法文件名 : 高温方法-280度-25min.gcm  
 批处理文件名 : 20230307.gcb  
 样品瓶号 : 1  
 进样体积 : 1 uL  
 分析日期 : 2023/3/7 11:39:09  
 处理日期 : 2023/3/7 12:04:16  
 样品类型 : 未知  
 分析者 : System Administrator  
 处理者 : System Administrator

<色谱图>

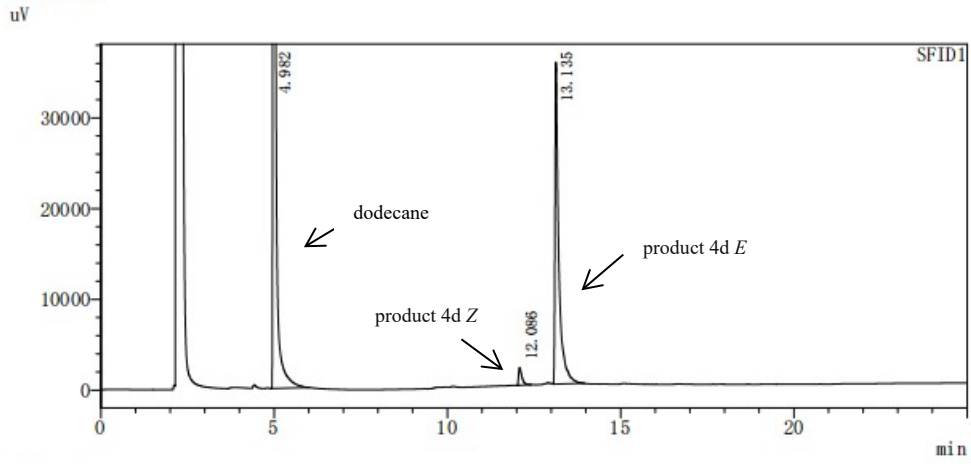

<峰表>

SFID1

| 峰号 | 保留时间   | 面积      | 高度     | 浓度     | 浓度单位 | 标记 | 化合物名 |
|----|--------|---------|--------|--------|------|----|------|
| 1  | 4.982  | 992554  | 263416 | 77.970 |      |    |      |
| 2  | 12.086 | 12913   | 1970   | 1.014  |      |    |      |
| 3  | 13.135 | 267521  | 35423  | 21.015 |      |    |      |
| 总计 |        | 1272988 | 300810 |        |      |    |      |

Reaction GC diagram

SHIMADZU LabSolutions 分析报告

<样品信息>

样品名 :  
 样品ID :  
 数据文件名 : 甲基OTF-4. gcd  
 方法文件名 : 高温方法-280度-25min. gcm  
 批处理文件名 : 2023. 3. 4. gcb  
 样品瓶号 : 1  
 进样体积 : 1 uL  
 分析日期 : 2023/3/5 22:18:44  
 处理日期 : 2023/3/5 22:43:46  
 样品类型 : 未知  
 分析者 : System Administrator  
 处理者 : System Administrator

<色谱图>

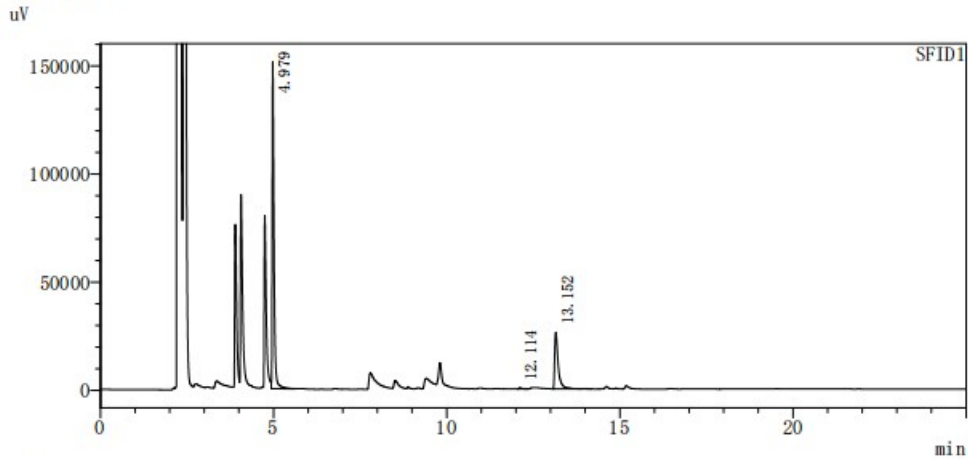

<峰表>

| 峰号 | 保留时间   | 面积     | 高度     | 浓度      | 浓度单位 | 标记 | 化合物名 |
|----|--------|--------|--------|---------|------|----|------|
| 1  | 4.979  | 532012 | 150121 | 73.426  |      |    |      |
| 2  | 12.114 | 3480   | 606    | 0.480   |      |    |      |
| 3  | 13.152 | 189062 | 26076  | 26.094  |      | S  |      |
| 总计 |        | 724554 | 176803 | 100.000 |      |    |      |

#### 4. Characterization data for the compound 1, 2, 4 and NBEs

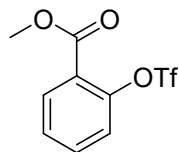

methyl 2-(((trifluoromethyl)sulfonyl)oxy)benzoate **1a**<sup>[3]</sup>

Yield 85%; colorless oil; purified by silica gel on column chromatography with petroleum ether/EtOAc = 10:1 (v/v). <sup>1</sup>H NMR (400 MHz, CDCl<sub>3</sub>) δ 8.07 (dd, *J* = 7.6, 1.6 Hz, 1H), 7.64-7.59 (m, 1H), 7.47-7.43 (m, 1H), 7.30 (d, *J* = 8.0 Hz, 1H), 3.94 (s, 3H). <sup>13</sup>C NMR (100 MHz, CDCl<sub>3</sub>) δ 164.02, 148.23, 134.30, 132.58, 128.42, 124.26, 122.65, 118.70 (q, *J* = 318.4 Hz), 52.37.

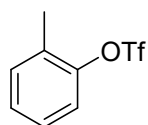

*o*-tolyl trifluoromethanesulfonate **1b**<sup>[3]</sup>

Yield 84%; colorless oil; purified by silica gel on column chromatography with petroleum ether/EtOAc = 10:1 (v/v). <sup>1</sup>H NMR (400 MHz, CDCl<sub>3</sub>) δ 7.23-7.14 (m, 4H), 2.32 (s, 3H). <sup>13</sup>C NMR (100 MHz, CDCl<sub>3</sub>) δ 148.64, 132.17, 130.90, 128.25, 127.61, 121.20, 118.84 (q, *J* = 317.7 Hz), 15.95.

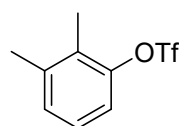

2,3-dimethylphenyl trifluoromethanesulfonate **1c**<sup>[4]</sup>

Yield 84%; colorless oil; purified by silica gel on column chromatography with petroleum ether/EtOAc = 10:1 (v/v). <sup>1</sup>H NMR (400 MHz, CDCl<sub>3</sub>) δ 7.16-7.05 (m, 3H), 2.29 (s, 3H), 2.25 (s, 3H). <sup>13</sup>C NMR (100 MHz, CDCl<sub>3</sub>) δ 148.62, 139.99, 129.60, 129.53, 126.71, 118.78, 118.76 (q, *J* = 318.0 Hz), 19.98, 12.76.

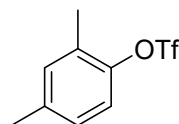

2,4-dimethylphenyl trifluoromethanesulfonate **1d**<sup>51</sup>

Yield 86%; colorless oil; purified by silica gel on column chromatography with petroleum ether/EtOAc = 10:1 (v/v). <sup>1</sup>H NMR (400 MHz, CDCl<sub>3</sub>) δ 7.12-6.99 (m, 3H), 2.32 (s, 3H), 2.31 (s, 3H). <sup>13</sup>C NMR (100 MHz, CDCl<sub>3</sub>) δ 146.53, 138.30, 132.72, 130.44, 128.13, 120.92, 118.72 (q, *J* = 318.1 Hz), 20.72, 16.20.

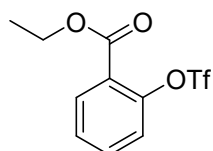

ethyl 2-(((trifluoromethyl)sulfonyl)oxy)benzoate **1e**<sup>61</sup>

Yield 87%; colorless oil; purified by column silica gel on column chromatography with petroleum ether/EtOAc = 10:1(v/v). <sup>1</sup>H NMR (400 MHz, CDCl<sub>3</sub>) δ 8.08 (dd, *J* = 7.6, 1.6 Hz, 1H), 7.64-7.59 (m, 1H), 7.49-7.45 (m, 1H), 7.30 (d, *J* = 8.0 Hz, 1H), 4.44 (q, *J* = 7.2 Hz, 2H), 1.41 (t, *J* = 7.2 Hz, 3H). <sup>13</sup>C NMR (100 MHz, CDCl<sub>3</sub>) δ 163.76, 148.27, 134.12, 132.69, 128.41, 124.84, 122.65, 118.74 (q, *J* = 318.6 Hz), 62.13, 13.97.

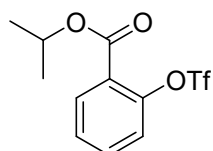

isopropyl 2-(((trifluoromethyl)sulfonyl)oxy)benzoate **1f**<sup>31</sup>

Yield 84%; colorless oil; purified by silica gel on column chromatography with petroleum ether/EtOAc = 10:1 (v/v). <sup>1</sup>H NMR (400 MHz, CDCl<sub>3</sub>) δ 8.07 (dd, *J* = 8.0, 1.2 Hz, 1H), 7.63-7.59 (m, 1H), 7.46 (t, *J* = 7.6 Hz, 1H), 7.29 (d, *J* = 8.4 Hz, 1H), 5.37-5.28 (m, 1H), 1.40 (d, *J* = 6.4 Hz, 6H). <sup>13</sup>C NMR (100 MHz, CDCl<sub>3</sub>) δ 163.29, 148.24, 133.93, 132.65, 128.36, 125.30, 122.58, 118.75 (q, *J* = 318.8 Hz), 70.18, 21.58.

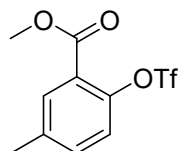

methyl 5-methyl-2-(((trifluoromethyl)sulfonyl)oxy)benzoate **1g**<sup>71</sup>

Yield 79%; colorless oil; purified by silica gel on column chromatography with petroleum ether/EtOAc = 10:1 (v/v). <sup>1</sup>H NMR (400 MHz, CDCl<sub>3</sub>) δ 7.87 (d, *J* = 2.0 Hz, 1H), 7.40 (dd, *J* =



8.4, 2.0 Hz, 1H), 7.17 (d,  $J = 8.4$  Hz, 1H), 3.94 (s, 3H), 2.40 (s, 3H).  $^{13}\text{C}$  NMR (100 MHz,  $\text{CDCl}_3$ )  $\delta$  164.21, 146.19, 138.82, 134.72, 132.90, 123.78, 122.36, 118.71 (q,  $J = 318.4$  Hz), 52.34, 20.45.

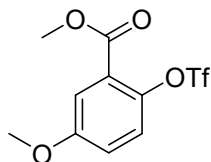

methyl 5-methoxy-2-(((trifluoromethyl)sulfonyl)oxy)benzoate **1h**<sup>181</sup>

Yield 85%; colorless oil; purified by silica gel on column chromatography with petroleum ether/EtOAc = 10:1 (v/v).  $^1\text{H}$  NMR (400 MHz,  $\text{CDCl}_3$ )  $\delta$  7.53 (d,  $J = 3.2$  Hz, 1H), 7.20 (d,  $J = 9.2$  Hz, 1H), 7.09 (dd,  $J = 9.2, 3.2$  Hz, 1H), 3.95 (s, 3H), 3.85 (s, 3H).  $^{13}\text{C}$  NMR (100 MHz,  $\text{CDCl}_3$ )  $\delta$  164.04, 158.72, 141.63, 125.08, 123.76, 119.61, 118.71 (q,  $J = 318.6$  Hz), 116.66, 55.82, 52.57.

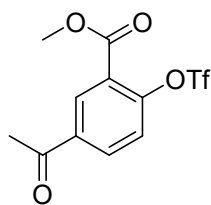

methyl 5-acetyl-2-(((trifluoromethyl)sulfonyl)oxy)benzoate **1i**<sup>191</sup>

Yield 85%; colorless oil; purified by silica gel on column chromatography with petroleum ether/EtOAc = 5:1 (v/v).  $^1\text{H}$  NMR (400 MHz,  $\text{CDCl}_3$ )  $\delta$  8.63 (d,  $J = 2.0$  Hz, 1H), 8.22 (d,  $J = 8.4$  Hz, 1H), 7.43 (d,  $J = 8.4$  Hz, 1H), 4.01-4.00 (m, 3H), 2.67 (d,  $J = 1.6$  Hz, 3H).  $^{13}\text{C}$  NMR (100 MHz,  $\text{CDCl}_3$ )  $\delta$  195.34, 163.46, 150.90, 136.71, 133.80, 132.89, 124.71, 123.39, 118.65 (d,  $J = 318.6$  Hz), 52.94, 26.64.

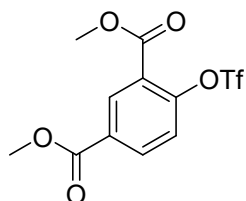

dimethyl 4-(((trifluoromethyl)sulfonyl)oxy)isophthalate **1j**<sup>101</sup>

Yield 85%; colorless oil; purified by silica gel on column chromatography with petroleum ether/EtOAc = 5:1 (v/v).  $^1\text{H}$  NMR (400 MHz,  $\text{CDCl}_3$ )  $\delta$  8.73 (d,  $J = 2.4$  Hz, 1H), 8.29 (dd,  $J = 8.8, 2.4$  Hz, 1H), 7.40 (d,  $J = 8.8$  Hz, 1H), 4.00 (s, 3H), 3.98 (s, 3H).  $^{13}\text{C}$  NMR (100 MHz,  $\text{CDCl}_3$ )  $\delta$  164.58, 163.29, 150.93, 135.22, 134.03, 130.45, 124.58, 123.12, 118.64 (q,  $J = 318.6$  Hz), 52.83,

52.69.

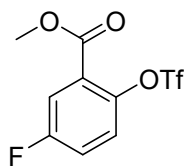

methyl 5-fluoro-2-(((trifluoromethyl)sulfonyl)oxy)benzoate **1k**<sup>[8]</sup>

Yield 87%; colorless oil; purified by silica gel on column chromatography with petroleum ether/EtOAc = 10:1 (v/v). <sup>1</sup>H NMR (400 MHz, DMSO)  $\delta$  7.85 (dd,  $J$  = 8.4, 3.2 Hz, 1H), 7.75-7.70 (m, 1H), 7.66 (dd,  $J$  = 8.8, 4.4 Hz, 1H), 3.94 (s, 3H). <sup>13</sup>C NMR (100 MHz, DMSO)  $\delta$  162.97 (d,  $J$  = 1.7 Hz), 162.24, 159.77, 143.92 (d,  $J$  = 3.0 Hz), 125.89 (dd,  $J$  = 20.0, 8.5 Hz), 122.31 (d,  $J$  = 23.9 Hz), 119.26 (d,  $J$  = 26.0 Hz), 118.63 (q,  $J$  = 318.6 Hz), 53.22.

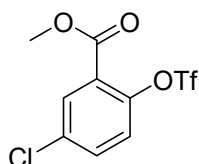

methyl 5-chloro-2-(((trifluoromethyl)sulfonyl)oxy)benzoate **1l**<sup>[11]</sup>

Yield 87%; colorless oil; purified by silica gel on column chromatography with petroleum ether/EtOAc = 10:1 (v/v). <sup>1</sup>H NMR (400 MHz, CDCl<sub>3</sub>)  $\delta$  8.04 (d,  $J$  = 2.8 Hz, 1H), 7.58 (dd,  $J$  = 8.8, 2.8 Hz, 1H), 7.26 (d,  $J$  = 8.8 Hz, 1H), 3.97 (s, 3H). <sup>13</sup>C NMR (100 MHz, CDCl<sub>3</sub>)  $\delta$  162.94, 146.59, 134.32, 134.08, 132.46, 125.67, 124.19, 118.66 (q,  $J$  = 318.6 Hz), 52.83.

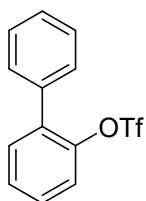

[1,1'-biphenyl]-2-yl trifluoromethanesulfonate **1m**<sup>[12]</sup>

Yield 83%; colorless oil; purified by silica gel on column chromatography with petroleum ether/EtOAc = 5:1 (v/v). <sup>1</sup>H NMR (400 MHz, CDCl<sub>3</sub>)  $\delta$  7.46-7.34 (m, 9H). <sup>13</sup>C NMR (100 MHz, CDCl<sub>3</sub>)  $\delta$  146.90, 135.66, 132.05, 129.45, 129.06, 128.61, 128.57, 128.38, 122.15, 118.45 (q,  $J$  = 318.4 Hz).

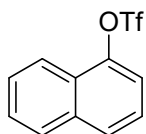

naphthalen-1-yl trifluoromethanesulfonate **1n**<sup>[4]</sup>

Yield 88%; colorless oil; purified by silica gel on column chromatography with petroleum ether/EtOAc = 5:1 (v/v). <sup>1</sup>H NMR (400 MHz, CDCl<sub>3</sub>) δ 8.04 (d, *J* = 8.4 Hz, 1H), 7.76 (d, *J* = 8.4 Hz, 1H), 7.71 (d, *J* = 8.4 Hz, 1H), 7.54-7.44 (m, 2H), 7.38 (d, *J* = 7.2 Hz, 1H), 7.32 (t, *J* = 7.6 Hz, 1H). <sup>13</sup>C NMR (100 MHz, CDCl<sub>3</sub>) δ 145.75, 134.99, 128.57, 128.11, 127.88, 127.40, 126.43, 125.09, 120.73, 119.014 (q, *J* = 318.0 Hz), 117.83.

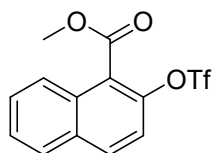

methyl 2-(((trifluoromethyl)sulfonyl)oxy)-1-naphthoate **1o**<sup>[9]</sup>

Yield 86%; colorless oil; purified by silica gel on column chromatography with petroleum ether/EtOAc = 5:1 (v/v). <sup>1</sup>H NMR (400 MHz, CDCl<sub>3</sub>) δ 8.09 (d, *J* = 8.4 Hz, 1H), 7.93 (d, *J* = 9.2 Hz, 1H), 7.82 (d, *J* = 8.0 Hz, 1H), 7.61-7.52 (m, 2H), 7.36 (d, *J* = 9.2 Hz, 1H), 4.07 (s, 3H). <sup>13</sup>C NMR (100 MHz, CDCl<sub>3</sub>) δ 165.03, 144.63, 133.07, 132.28, 130.63, 128.73, 128.34, 127.56, 125.61, 123.57, 119.12, 118.63 (q, *J* = 318.2 Hz), 52.92.

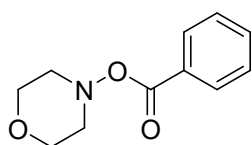

morpholino benzoate **2a**<sup>[13]</sup>

Yield 86%; colorless oil; purified by silica gel on column chromatography with petroleum ether/EtOAc = 5:1 (v/v). <sup>1</sup>H NMR (400 MHz, CDCl<sub>3</sub>) δ 8.02-8.00 (m, 2H), 7.59-7.55 (m, 1H), 7.46-7.42 (m, 2H), 3.98-3.83 (m, 4H), 3.44-3.41 (m, 2H), 3.04-3.00 (m, 2H). <sup>13</sup>C NMR (100 MHz, CDCl<sub>3</sub>) δ 164.53, 133.19, 129.42, 129.12, 128.44, 65.81, 56.97.

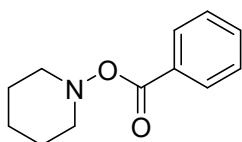

piperidin-1-yl benzoate **2b**<sup>[13]</sup>

Yield 88%; white solid; purified by silica gel on column chromatography with petroleum ether/EtOAc = 5:1 (v/v). <sup>1</sup>H NMR (400 MHz, CDCl<sub>3</sub>) δ 8.04-7.98 (m, 2H), 7.58-7.53 (m, 1H), 7.47-7.39 (m, 2H), 3.51 (s, 2H), 2.80-2.78 (m, 2H), 1.84-1.83 (m, 4H), 1.67 (s, 1H), 1.29 (s, 1H). <sup>13</sup>C NMR (100 MHz, CDCl<sub>3</sub>) δ 164.56, 132.83, 129.53, 129.26, 128.26, 57.39, 24.90, 23.22.

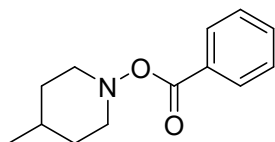

4-methylpiperidin-1-yl benzoate **2c**<sup>[13]</sup>

Yield 80%; colorless oil; purified by silica gel on column chromatography with petroleum ether/EtOAc = 5:1 (v/v). <sup>1</sup>H NMR (400 MHz, CDCl<sub>3</sub>) δ 8.01 (d, *J* = 7.2 Hz, 2H), 7.55 (t, *J* = 7.2 Hz, 1H), 7.43 (t, *J* = 7.6 Hz, 2H), 3.53 (d, *J* = 9.2 Hz, 2H), 2.74 (t, *J* = 10.8 Hz, 2H), 1.93-1.76 (m, 2H), 1.65-1.55 (m, 2H), 1.50-1.42 (m, 1H), 0.95 (d, *J* = 6.0 Hz, 3H). <sup>13</sup>C NMR (100 MHz, CDCl<sub>3</sub>) δ 164.81, 132.91, 129.62, 129.39, 128.35, 57.19, 33.52, 30.08, 21.20.

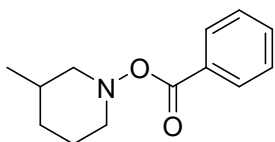

3-methylpiperidin-1-yl benzoate **2d**<sup>[13]</sup>

Yield 83%; colorless oil; purified by silica gel on column chromatography with petroleum ether/EtOAc = 5:1 (v/v). <sup>1</sup>H NMR (400 MHz, CDCl<sub>3</sub>) δ 8.03-7.98 (m, 2H), 7.55-7.51 (m, 1H), 7.41 (t, *J* = 8.0 Hz, 2H), 3.51 (d, *J* = 10.4 Hz, 2H), 2.61 (t, *J* = 9.2 Hz, 1H), 2.36-2.29 (m, 1H), 2.00-1.67 (m, 4H), 0.94 (s, 2H), 0.92 (s, 2H). <sup>13</sup>C NMR (100 MHz, CDCl<sub>3</sub>) δ 164.66, 132.87, 129.30, 128.29, 77.66, 77.34, 77.02, 64.71, 56.97, 31.93, 31.35, 24.60, 19.47.

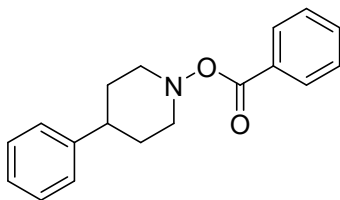

4-phenylpiperidin-1-yl benzoate **2e**<sup>[14]</sup>

Yield 82%; white solid; purified by silica gel on column chromatography with petroleum

ether/EtOAc = 5:1 (v/v).  $^1\text{H}$  NMR (400 MHz,  $\text{CDCl}_3$ )  $\delta$  8.04 (d,  $J = 7.6$  Hz, 2H), 7.56 (t,  $J = 7.2$  Hz, 1H), 7.45 (t,  $J = 7.6$  Hz, 2H), 7.32 (t,  $J = 7.2$  Hz, 2H), 7.25-7.20 (m, 3H), 3.68 (d,  $J = 10.4$  Hz, 2H), 2.91 (t,  $J = 10.8$  Hz, 2H), 2.63 (t,  $J = 12.0$  Hz, 1H), 2.21-2.12 (m, 2H), 2.04-1.80 (m, 2H).  $^{13}\text{C}$  NMR (100 MHz,  $\text{CDCl}_3$ )  $\delta$  164.87, 144.87, 133.08, 129.48, 128.62, 128.46, 126.85, 126.53, 57.46, 41.77, 32.80.

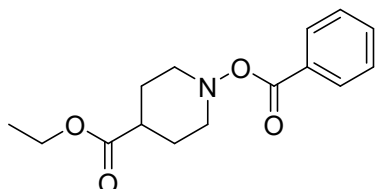

ethyl 1-(benzoyloxy)piperidine-4-carboxylate **2f**<sup>[14]</sup>

Yield 87%; white solid; purified by silica gel on column chromatography with petroleum ether/EtOAc = 5:1 (v/v).  $^1\text{H}$  NMR (400 MHz,  $\text{CDCl}_3$ )  $\delta$  8.00 (d,  $J = 8.4$  Hz, 2H), 7.58-7.53 (m, 1H), 7.45-7.41 (m, 2H), 4.16 (s, 2H), 3.60 (s, 1H), 3.27 (s, 1H), 2.78 (s, 1H), 2.61-1.97 (m, 5H), 1.26 (s, 3H).  $^{13}\text{C}$  NMR (100 MHz,  $\text{CDCl}_3$ )  $\delta$  173.95 (s), 164.59 (s), 133.03 (s), 129.36 (s), 128.37 (s), 60.51 (s), 56.11 (s), 40.33 (s), 27.57 (s), 14.18 (s).

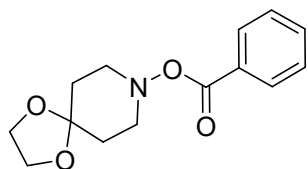

1,4-dioxa-8-azaspiro[4.5]decan-8-yl benzoate **2g**<sup>[14]</sup>

Yield 79%; colorless oil; Yield 87%; white solid; purified by silica gel on column chromatography with petroleum ether/EtOAc = 5:1 (v/v).  $^1\text{H}$  NMR (400 MHz,  $\text{CDCl}_3$ )  $\delta$  8.01-7.99 (m, 2H), 7.58-7.53 (m, 1H), 7.45-7.41 (m, 2H), 3.97 (d,  $J = 1.6$  Hz, 4H), 3.44 (b, 2H), 3.27-3.25 (m, 2H), 1.96 (t,  $J = 5.6$  Hz, 4H).  $^{13}\text{C}$  NMR (100 MHz,  $\text{CDCl}_3$ )  $\delta$  164.56, 133.00, 129.26, 129.20, 128.33, 105.78, 64.36, 64.24, 53.87, 32.51.

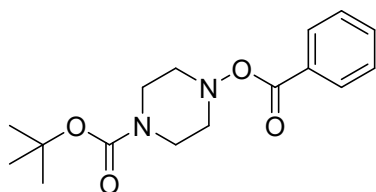

tert-butyl 4-(benzoyloxy)piperazine-1-carboxylate **2h**<sup>[13]</sup>

Yield 85%; white solid; purified by silica gel on column chromatography with petroleum ether/EtOAc = 2:1 (v/v).  $^1\text{H}$  NMR (400 MHz,  $\text{CDCl}_3$ )  $\delta$  8.01 (d,  $J = 7.6$  Hz, 2H), 7.58 (t,  $J = 7.2$  Hz, 1H), 7.45 (t,  $J = 7.6$  Hz, 2H), 4.04 (s, 2H), 3.44-3.32 (m, 4H), 2.92 (s, 2H), 1.48 (s, 9H).  $^{13}\text{C}$  NMR (100 MHz,  $\text{CDCl}_3$ )  $\delta$  164.58, 154.45, 133.26, 129.46, 129.08, 128.48, 80.25, 55.85, 42.36, 28.39.

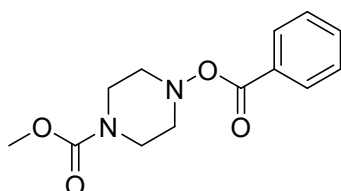

methyl 4-(benzoyloxy)piperazine-1-carboxylate **2i**<sup>[15]</sup>

Yield 87%; white solid; purified by silica gel on column chromatography with petroleum ether/EtOAc = 2:1 (v/v).  $^1\text{H}$  NMR (400 MHz,  $\text{CDCl}_3$ )  $\delta$  8.01-7.99 (m, 2H), 7.58 (t,  $J = 7.2$  Hz, 1H), 7.45 (t,  $J = 8.0$  Hz, 2H), 4.09 (s, 2H), 3.73 (s, 3H), 3.45-3.38 (m, 4H), 2.93 (s, 2H).  $^{13}\text{C}$  NMR (100 MHz,  $\text{CDCl}_3$ )  $\delta$  164.49, 155.63, 133.27, 129.42, 128.98, 128.47, 55.71, 52.84, 42.16.

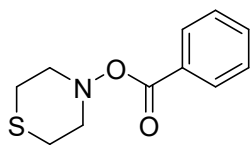

thiomorpholino benzoate **2j**<sup>[14]</sup>

Yield 84%; white solid; purified by silica gel on column chromatography with petroleum ether/EtOAc = 5:1 (v/v).  $^1\text{H}$  NMR (400 MHz,  $\text{CDCl}_3$ )  $\delta$  8.03-8.00 (m, 2H), 7.60-7.56 (m, 1H), 7.47-7.43 (m, 2H), 3.69-2.86 (m, 8H).  $^{13}\text{C}$  NMR (100 MHz,  $\text{CDCl}_3$ )  $\delta$  164.43, 133.27, 129.48, 129.16, 128.50, 57.74, 26.66.

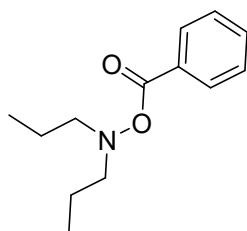

*O*-benzoyl-*N,N*-dipropylhydroxylamine **2k**<sup>[16]</sup>

Yield 82%; white solid; purified by silica gel on column chromatography with petroleum

ether/EtOAc = 10:1 (v/v).  $^1\text{H}$  NMR (400 MHz,  $\text{CDCl}_3$ )  $\delta$  8.11-7.90 (m, 1H), 7.60-7.51 (m, 1H), 7.48-7.39 (m, 1H), 2.98-2.89 (m, 2H), 1.72-1.51 (m, 2H), 0.95 (t,  $J = 7.2$  Hz, 3H).  $^{13}\text{C}$  NMR (100 MHz,  $\text{CDCl}_3$ )  $\delta$  165.64, 132.94, 129.46, 129.32, 128.38, 77.46, 77.14, 76.82, 61.62, 20.17, 11.71.

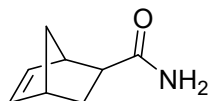

(1*R*,4*R*)-bicyclo[2.2.1]hept-5-ene-2-carboxamide **N<sup>7</sup>**<sup>[17]</sup>

Yield 56%; white solid; purified by silica gel on column chromatography with petroleum ether/EtOAc = 10:1 (v/v).  $^1\text{H}$  NMR (400 MHz,  $\text{CDCl}_3$ )  $\delta$  6.26 (dd,  $J = 5.6, 2.8$  Hz, 1H), 6.03 (dd,  $J = 5.6, 2.8$  Hz, 1H), 5.35 (b, 2H), 3.15 (s, 1H), 2.96-2.88 (m, 2H), 1.96-1.94 (m, 1H), 1.47-1.35 (m, 1H), 1.36-1.30 (m, 2H).  $^{13}\text{C}$  NMR (100 MHz,  $\text{CDCl}_3$ )  $\delta$  138.00, 132.23, 50.14, 46.24, 44.48, 42.75, 29.98.

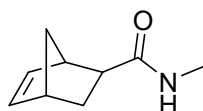

(1*R*,4*R*)-*N*-methylbicyclo[2.2.1]hept-5-ene-2-carboxamide **N<sup>8</sup>**<sup>[17]</sup>

Yield 62%; white solid; purified by silica gel on column chromatography with petroleum ether/EtOAc = 10:1 (v/v).  $^1\text{H}$  NMR (400 MHz,  $\text{CDCl}_3$ )  $\delta$  6.22 (dd,  $J = 5.6, 3.2$  Hz, 1H), 5.97 (dd,  $J = 5.2, 2.4$  Hz, 1H), 5.78 (b, 1H), 3.14 (s, 1H), 2.94 – 2.84 (m, 2H), 2.75 (d,  $J = 4.8$  Hz, 3H), 1.93-1.92 (m, 1H), 1.48-1.41 (m, 1H), 1.37-1.25 (m, 2H).  $^{13}\text{C}$  NMR (100 MHz,  $\text{CDCl}_3$ )  $\delta$  175.06, 137.66, 132.32, 50.00, 46.16, 44.68, 42.71, 29.86, 26.27.

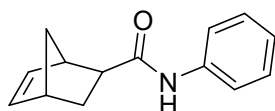

(1*R*,4*R*)-*N*-phenylbicyclo[2.2.1]hept-5-ene-2-carboxamide **N<sup>9</sup>**<sup>[17]</sup>

Yield 68%; white solid; purified by silica gel on column chromatography with petroleum ether/EtOAc = 10:1 (v/v).  $^1\text{H}$  NMR (400 MHz,  $\text{CDCl}_3$ )  $\delta$  7.48 (d,  $J = 8.0$  Hz, 2H), 7.34-7.23 (m, 3H), 7.07 (t,  $J = 7.2$  Hz, 1H), 6.29 (dd,  $J = 6.0, 3.2$  Hz, 1H), 6.04 (dd,  $J = 5.6, 2.8$  Hz, 1H), 3.22 (s, 1H), 3.05-2.93 (m, 2H), 2.03-1.94 (m, 1H), 1.52-1.43 (m, 2H), 1.33 (d,  $J = 8.4$  Hz, 1H).  $^{13}\text{C}$  NMR

(100 MHz, CDCl<sub>3</sub>)  $\delta$  172.65, 138.11 (d,  $J$  = 5.1 Hz), 132.05, 128.95, 123.98, 119.72, 750.21, 46.59, 45.89, 42.89, 29.96.

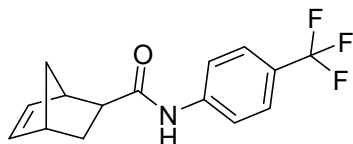

(1*R*,4*R*)-*N*-(4-(trifluoromethyl)phenyl)bicyclo[2.2.1]hept-5-ene-2-carboxamide **N<sup>10</sup>**

Yield 56%; white solid; purified by silica gel on column chromatography with petroleum ether/EtOAc = 10:1 (v/v). <sup>1</sup>H NMR (400 MHz, CDCl<sub>3</sub>)  $\delta$  7.58 (dd,  $J$  = 23.6, 8.8 Hz, 4H), 7.26 (s, 1H), 6.32 (dd,  $J$  = 5.6, 3.2 Hz, 1H), 6.04 (dd,  $J$  = 5.6, 2.8 Hz, 1H), 3.25 (s, 1H), 3.08-2.98 (m, 2H), 2.08-1.99 (m, 1H), 1.55-1.45 (m, 2H), 1.37 (d,  $J$  = 8.0 Hz, 1H). <sup>13</sup>C NMR (100 MHz, DMSO)  $\delta$  173.03, 143.58, 137.82, 132.05, 126.36 (d,  $J$  = 3.6 Hz), 124.92 (dd,  $J$  = 270, 539 Hz), 123.18 (d,  $J$  = 31.7 Hz), 119.31, 50.07, 46.65, 44.91, 42.79, 28.71.

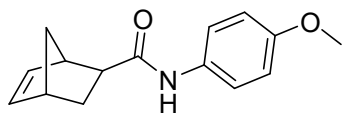

(1*R*,4*R*)-*N*-(4-methoxyphenyl)bicyclo[2.2.1]hept-5-ene-2-carboxamide **N<sup>11</sup>** <sup>[17]</sup>

Yield 66%; white solid; purified by silica gel on column chromatography with petroleum ether/EtOAc = 10:1 (v/v). <sup>1</sup>H NMR (400 MHz, DMSO)  $\delta$  9.58 (s, 1H), 7.46 (d,  $J$  = 8.8 Hz, 2H), 6.84 (d,  $J$  = 8.8 Hz, 2H), 6.15 (dd,  $J$  = 5.6, 2.8 Hz, 1H), 5.85 (dd,  $J$  = 5.6, 2.8 Hz, 1H), 3.70 (s, 3H), 3.26 (s, 1H), 3.03-2.96 (m, 1H), 2.86 (s, 1H), 1.80-1.78 (m, 1H), 1.44-1.27 (m, 3H). <sup>13</sup>C NMR (100 MHz, DMSO)  $\delta$  171.90, 155.32, 137.54, 133.24, 132.28, 121.18, 114.13, 55.59, 50.07, 46.60, 44.54, 42.76, 28.85.

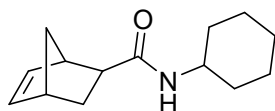

(1*R*,4*R*)-*N*-cyclohexylbicyclo[2.2.1]hept-5-ene-2-carboxamide **N<sup>12</sup>** <sup>[18]</sup>

Yield 61%; white solid; purified by silica gel on column chromatography with petroleum ether/EtOAc = 10:1 (v/v). <sup>1</sup>H NMR (400 MHz, DMSO)  $\delta$  7.69 (d,  $J$  = 7.6 Hz, 1H), 6.12 (s, 2H), 3.54-3.47 (m, 1H), 2.82 (s, 1H), 2.73 (s, 1H), 2.02-1.99 (m,  $J$  = 9.2, 4.1 Hz, 1H), 1.77-1.64 (m,



6H), 1.55 (d,  $J = 12.4$  Hz, 1H), 1.29-1.18 (m, 2H), 1.16-1.06 (m, 5H).  $^{13}\text{C}$  NMR (100 MHz, DMSO)  $\delta$  174.01, 138.15, 136.84, 47.90, 47.60, 46.05, 43.38, 41.47, 33.05, 32.98, 30.23, 25.76, 25.14.

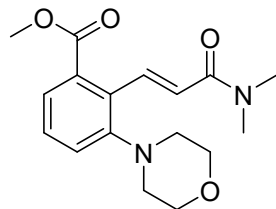

methyl (*E*)-2-(3-(dimethylamino)-3-oxoprop-1-en-1-yl)-3-morpholinobenzoate **4a**

Yield 95%; yellow oil; *E/Z* isomer > 99:1; purified by silica gel on column chromatography with petroleum ether/EtOAc = 2:1 (v/v).  $^1\text{H}$  NMR (400 MHz, DMSO)  $\delta$  7.69 (d,  $J = 16.0$  Hz, 1H), 7.42 (t,  $J = 7.6$  Hz, 1H), 7.27 (d,  $J = 8.0$  Hz, 2H), 6.80 (d,  $J = 16.0$  Hz, 1H), 3.78 (s, 3H), 3.70 (t,  $J = 4.4$  Hz, 4H), 3.06 (s, 3H), 2.93 (s, 3H), 2.87 (t,  $J = 4.4$  Hz, 4H).  $^{13}\text{C}$  NMR (100 MHz, DMSO)  $\delta$  169.36, 165.68, 152.28, 137.11, 133.67, 129.82, 128.68, 123.19, 122.62, 121.84, 66.81, 52.83, 52.50, 37.16, 35.69. HRMS (ESI) Calcd for  $\text{C}_{17}\text{H}_{22}\text{N}_2\text{O}_4$   $[\text{M}+\text{H}]^+$  319.1652; Found 319.1652. GC-MS (EI, 70 eV)  $m/z = 318([\text{M}-\text{CH}_3]^+, 0.85)$ , 273(24), 246(51), 232(51), 214(35), 156(23), 129(21), 87(42), 72(100).

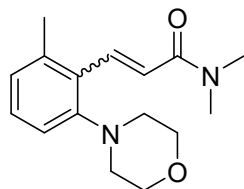

*N,N*-dimethyl-3-(2-methyl-6-morpholinophenyl)acrylamide **4b**

Yield 72%; yellow oil; *E/Z* isomer 98:2; purified by silica gel on column chromatography with petroleum ether/EtOAc = 2:1 (v/v).  $^1\text{H}$  NMR (400 MHz,  $\text{CDCl}_3$ )  $\delta$  7.92 (d,  $J = 16.0$  Hz, 1H, *E*), 7.21-7.17(m, 1H, *E*), 6.98-6.87 (m, 3H, *E+Z*), 6.30 (d,  $J = 12.0$  Hz, 1H, *Z*), 3.83 (t,  $J = 4.4$  Hz, 4H, *E*), 3.79 (t,  $J = 4.4$  Hz, 4H, *Z*), 3.15 (s, 3H, *E*), 3.09 (s, 3H, *E*), 2.99-2.93 (m, 5H, *E+Z*), 2.89 (s, 3H, *Z*), 2.42 (s, 3H, *E*), 2.18 (s, 3H, *Z*).  $^{13}\text{C}$  NMR (100 MHz,  $\text{CDCl}_3$ )  $\delta$  167.24 (*E*), 152.31 (*E*), 139.31 (*E*), 137.86 (*E*), 136.38 (*Z*), 136.23 (*Z*), 129.18 (*E*), 128.93 (*E*), 128.16 (*Z*), 125.77 (*E*), 125.22 (*Z*), 123.43 (*Z*), 121.58 (*E*), 116.30 (*E*), 115.58 (*Z*), 67.31 (*Z*), 52.63 (*E*), 37.36 (*E*), 35.85 (*E*), 34.77 (*Z*), 21.69 (*E*), 20.07 (*Z*). HRMS (ESI) Calcd for  $\text{C}_{16}\text{H}_{22}\text{N}_2\text{O}_2$   $[\text{M}+\text{H}]^+$  275.1754; Found

275.1754. GC-MS (EI, 70 eV)  $m/z = 274([M]^+ , 46), 243(10), 229(9), 202(100), 188(39), 170(25), 158(47), 144(84), 115(40), 103(6).$

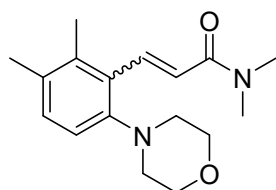

3-(2, 3-dimethyl-6-morpholinophenyl)-*N, N*-dimethylacrylamide **4c**

Yield 58%; yellow oil; *E/Z* isomer 98:2; purified by silica gel on column chromatography with petroleum ether/EtOAc = 2:1 (v/v).  $^1\text{H NMR}$  (400 MHz,  $\text{CDCl}_3$ )  $\delta$  7.92 (d,  $J = 16.0$  Hz, 1H, *E*), 7.10 (d,  $J = 8.4$  Hz, 1H, *E*), 7.05 (d,  $J = 8.0$  Hz, 1H, *Z*), 6.91 (d,  $J = 12.4$  Hz, 1H, *Z*), 6.85 (s, 1H, *E*), 6.82 (d,  $J = 7.2$  Hz, 1H, *E*), 6.32 (d,  $J = 12.4$  Hz, 1H, *Z*), 3.80 (t,  $J = 4.4$  Hz, 4H, *E*), 3.77 (d,  $J = 4.8$  Hz, 4H, *Z*), 3.14 (s, 3H, *E*), 3.08 (s, 3H, *E*), 2.98 (s, 3H, *Z*), 2.93 (d,  $J = 4.4$  Hz, 4H, *Z*), 2.91-2.88 (m, 7H, *E+Z*), 2.31 (s, 3H, *E*), 2.26 (s, 3H, *E*), 2.22 (s, 3H, *Z*), 2.10 (s, 3H, *Z*).  $^{13}\text{C NMR}$  (100 MHz,  $\text{CDCl}_3$ )  $\delta$  167.48 (*Z*), 167.05 (*E*), 150.07 (*E*), 148.97 (*Z*), 139.97 (*E*), 137.02 (*Z*), 135.93 (*E*), 134.55 (*Z*), 132.08 (*E*), 130.29 (*E*), 130.12 (*E*), 129.64 (*Z*), 123.45 (*Z*), 122.44 (*E*), 115.96 (*E*), 115.54 (*Z*), 67.35 (*E*), 52.65 (*E*), 37.35 (*E*), 35.82 (*E*), 34.76 (*Z*), 20.45 (*E*), 20.33 (*Z*), 17.31 (*E*), 16.42 (*Z*). HRMS (ESI) Calcd for  $\text{C}_{17}\text{H}_{24}\text{N}_2\text{O}_2$   $[M+H]^+$  289.1911; Found 289.1911. GC-MS (EI, 70 eV)  $m/z = 288([M]^+ , 9), 257(9), 243(14), 228(2), 216(100), 201(49), 184(26), 172(45), 158(74), 143(18), 129(13), 115(17), 103(3).$

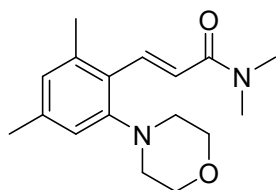

(*E*)-3-(2, 4-dimethyl-6-morpholinophenyl)-*N, N*-dimethylacrylamide **4d**

Yield 64%; white solid; mp = 128.7-128.8 °C; *E/Z* isomer > 99:1; purified by silica gel on column chromatography with petroleum ether/EtOAc = 2:1 (v/v).  $^1\text{H NMR}$  (400 MHz, DMSO)  $\delta$  7.69 (d,  $J = 15.6$  Hz, 1H), 6.93 (d,  $J = 16.0$  Hz, 1H), 6.78 (d,  $J = 11.2$  Hz, 2H), 3.70 (t,  $J = 4.4$  Hz, 4H), 3.11 (s, 3H), 2.94 (s, 3H), 2.83 (t,  $J = 4.4$  Hz, 4H), 2.35 (s, 3H), 2.26 (s, 3H).  $^{13}\text{C NMR}$  (100 MHz,  $\text{CDCl}_3$ )  $\delta$  167.47, 152.45, 139.32, 139.08, 137.89, 126.66, 126.12, 120.74, 117.14, 67.35, 52.69,

37.37, 35.86, 21.69, 21.46. HRMS (ESI) Calcd for  $C_{17}H_{24}N_2O_2$   $[M+H]^+$  289.1911; Found 289.1911. GC-MS (EI, 70 eV)  $m/z$  = 288( $[M]^+$ , 7), 257(7), 243(8), 216(100), 201(33), 184(22), 172(37), 158(56), 143(13), 129(10), 115(13).

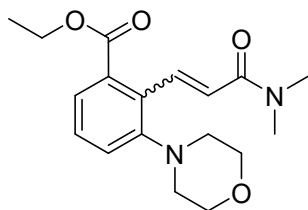

ethyl-2-(3-(dimethylamino)-3-oxoprop-1-en-1-yl)-3-morpholinobenzoate **4e**

Yield 98%; yellow oil; *E/Z* isomer 98:2; purified by silica gel on column chromatography with petroleum ether/EtOAc = 2:1 (v/v).  $^1H$  NMR (400 MHz,  $CDCl_3$ )  $\delta$  7.96 (d,  $J$  = 16.0 Hz, 1H, *E*), 7.56-7.51 (m, 2H, *Z*), 7.37-7.29 (m, 2H, *E*), 7.15 (dd,  $J$  = 7.6, 1.6 Hz, 1H, *E*), 7.08 (d,  $J$  = 12.4 Hz, 1H, *Z*), 6.81 (d,  $J$  = 16.0 Hz, 1H, *E*), 6.26 (d,  $J$  = 12.4 Hz, 1H, *Z*), 4.31 (q,  $J$  = 6.8 Hz, 2H, *E*), 3.83 (t,  $J$  = 4.4 Hz, 4H, *E*), 3.79 (t,  $J$  = 4.4 Hz, 4H, *Z*), 3.12 (s, 3H, *E*), 3.06 (s, 3H, *E*), 2.95 (t,  $J$  = 4.4 Hz, 4H, *E*), 2.90 (s, 3H, *Z*), 2.82 (s, 3H, *Z*), 1.34 (t,  $J$  = 7.2 Hz, 3H, *E*), 0.96 (t,  $J$  = 7.2 Hz, 3H, *Z*).  $^{13}C$  NMR (100 MHz,  $CDCl_3$ )  $\delta$  169.15 (*E*), 166.50 (*E*), 152.01 (*E*), 151.39 (*Z*), 138.29 (*E*), 135.23 (*Z*), 133.62 (*E*), 129.44 (*E*), 129.04 (*E*), 128.23 (*Z*), 124.55 (*Z*), 123.29 (*E*), 122.55 (*Z*), 122.07 (*E*), 121.08 (*E*), 67.12 (*E*), 67.03 (*Z*), 61.46 (*E*), 60.84 (*Z*), 52.40 (*Z*), 37.48 (*Z*), 37.26 (*E*), 35.76 (*E*), 34.69 (*Z*), 14.21 (*Z*), 14.12 (*E*). HRMS (ESI) Calcd for  $C_{18}H_{24}N_2O_4$   $[M+H]^+$  333.1809; Found 333.1808. GC-MS (EI, 70 eV)  $m/z$  = 332( $[M]^+$ , 1), 287(27), 260(36), 246(41), 230(21), 214(19), 200(24), 188(9), 174(15), 156(18), 144(10), 130(15), 117(7).

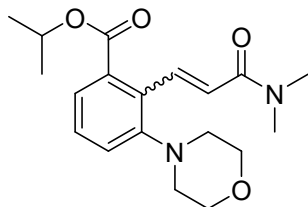

isopropyl-2-(3-(dimethylamino)-3-oxoprop-1-en-1-yl)-3-morpholinobenzoate **4f**

Yield 92%; yellow oil; *E/Z* isomer 98:2; purified by silica gel on column chromatography with petroleum ether/EtOAc = 2:1 (v/v).  $^1H$  NMR (400 MHz,  $CDCl_3$ )  $\delta$  7.95 (d,  $J$  = 16.0 Hz, 1H, *E*), 7.55-7.50 (m, 1H, *Z*), 7.36-7.27 (m, 2H, *E*), 7.14 (dd,  $J$  = 8.0, 0.8 Hz, 1H, *E*), 7.07 (d,  $J$  = 12.4, Hz,

1H, Z), 6.82 (d,  $J = 16.0$  Hz, 1H, *E*), 6.24 (d,  $J = 12.4$  Hz, 1H, *Z*), 5.22-5.14 (m, 1H, *E*), 3.82 (t,  $J = 4.4$ , Hz, 4H, *E*), 3.79 (t,  $J = 4.4$ , Hz, 4H, *Z*), 3.12 (s, 3H, *E*), 3.06 (s, 3H, *E*), 2.96-2.92 (m, 8H, *E+Z*), 2.89 (s, 3H, *Z*), 2.81 (s, 3H, *Z*), 1.33 (s, 3H, *E*), 1.31 (s, 3H, *E*).  $^{13}\text{C}$  NMR (100 MHz,  $\text{CDCl}_3$ )  $\delta$  168.72 (*E*), 166.43 (*E*), 151.99 (*E*), 138.39 (*E*), 135.42 (*Z*), 134.11 (*E*), 129.39 (*E*), 129.03 (*E*), 128.19 (*Z*), 124.58 (*Z*), 123.27 (*E*), 122.36 (*Z*), 122.06 (*E*), 121.81 (*Z*), 120.97 (*E*), 69.08 (*E*), 68.33 (*Z*), 67.15 (*E*), 67.01 (*Z*), 52.41 (*E*), 37.48 (*Z*), 37.26 (*E*), 35.78 (*E*), 34.73 (*Z*), 29.70 (*Z*), 21.72 (*E*). HRMS (ESI) Calcd for  $\text{C}_{19}\text{H}_{26}\text{N}_2\text{O}_4$   $[\text{M}+\text{H}]^+$  347.1965; Found 347.1965. GC-MS (EI, 70 eV)  $m/z = 346([\text{M}]^+, 1)$ , 315(2), 301(25), 287(11), 274(26), 260(39), 242(10), 232(37), 218(31), 200(24), 188(19), 174(22), 156(16), 144(11), 130(15), 117(7).

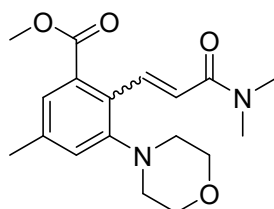

methyl-2-(3-(dimethylamino)-3-oxoprop-1-en-1-yl)-5-methyl-3-morpholinobenzoate **4g**

Yield 94%; yellow oil; *E/Z* isomer 98:2; purified by silica gel on column chromatography with petroleum ether/EtOAc = 2:1(v/v).  $^1\text{H}$  NMR (400 MHz, DMSO)  $\delta$  7.68 (d,  $J = 15.6$  Hz, 1H, *E*), 7.17 (s, 2H, *Z*), 7.09 (s, 2H, *E*), 6.88 (d,  $J = 12.4$  Hz, 1H, *Z*), 6.80 (d,  $J = 15.6$  Hz, 1H, *E*), 6.29 (d,  $J = 12.4$  Hz, 1H, *Z*), 3.79 (s, 3H, *E*), 3.77 (t,  $J = 4.4$  Hz, 4H, *E*), 3.67 (t,  $J = 4.4$  Hz, 4H, *Z*), 3.06 (s, 3H, *E*), 2.93 (s, 3H, *E*), 2.89 - 2.86(m, 7H, *E+Z*), 2.70 (s, 3H, *Z*), 2.33 (s, 3H, *E*), 2.31 (s, 3H, *Z*).  $^{13}\text{C}$  NMR (100 MHz, DMSO)  $\delta$  169.53 (*E*), 165.78 (*E*), 152.34 (*E*), 139.80 (*E*), 137.97 (*Z*), 137.11 (*E*), 134.54 (*Z*), 133.65 (*E*), 129.74 (*Z*), 129.04 (*Z*), 125.53 (*E*), 124.50 (*Z*), 123.67 (*E*), 122.91 (*Z*), 122.35 (*E*), 121.74 (*E*), 66.83 (*E*), 52.81 (*E*), 52.55 (*E*), 37.38 (*Z*), 37.14 (*E*), 35.70 (*E*), 34.51 (*Z*), 21.31 (*E*), 21.24 (*Z*). HRMS (ESI) Calcd for  $\text{C}_{18}\text{H}_{24}\text{N}_2\text{O}_4$   $[\text{M}+\text{H}]^+$  333.1809; Found 333.1810. GC-MS (EI, 70 eV)  $m/z = 332([\text{M}]^+, 2)$ , 301(7), 287(28), 273(3), 260(66), 246(53), 228(42), 216(26), 202(32), 184(10), 170(22), 158(13), 143(21), 130(9), 115(20).

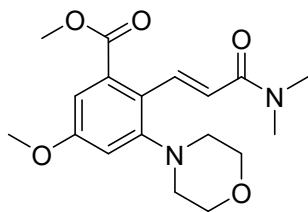

methyl (*E*)-2-(3-(dimethylamino)-3-oxoprop-1-en-1-yl)-5-methoxy-3-morpholinobenzoate **4h**

Yield 80%; yellow oil; *E/Z* isomer > 99:1; purified by silica gel on column chromatography with petroleum ether/EtOAc = 2:1 (v/v). <sup>1</sup>H NMR (400 MHz, DMSO) δ 7.63 (d, *J* = 15.6 Hz, 1H), 6.83-6.80 (m, 2H), 6.76 (d, *J* = 2.4 Hz, 1H), 3.81 (s, 3H), 3.80 (s, 3H), 3.71 (t, *J* = 4.4 Hz, 4H), 3.06 (s, 3H), 2.92 (s, 3H), 2.88 (t, *J* = 4.4 Hz, 4H). <sup>13</sup>C NMR (100 MHz, DMSO) δ 169.38, 165.93, 160.35, 154.09, 136.90, 135.20, 120.54, 108.02, 107.88, 66.78, 56.00, 52.94, 52.50, 37.14, 35.70. HRMS (ESI) Calcd for C<sub>18</sub>H<sub>24</sub>N<sub>2</sub>O<sub>5</sub> [M+H]<sup>+</sup> 349.1758; Found 349.1755. GC-MS (EI, 70 eV) *m/z* = 348([M]<sup>+</sup>, 3), 317(6), 303(30), 276(73), 261(50), 244(30), 230(27), 218(30), 202(10), 186(16), 174(8), 159(11), 144(11), 116(12).

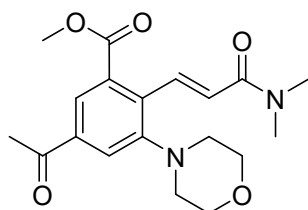

methyl (*E*)-5-acetyl-2-(3-(dimethylamino)-3-oxoprop-1-en-1-yl)-3-morpholinobenzoate **4i**

Yield 86%; white solid; mp: 161.0-161.1 °C; *E/Z* isomer > 99:1; purified by silica gel on column chromatography with petroleum ether/EtOAc = 2:1 (v/v). <sup>1</sup>H NMR (400 MHz, DMSO) δ 7.85 (d, *J* = 1.6 Hz, 1H), 7.70-7.66 (m, 2H), 6.90 (d, *J* = 15.6 Hz, 1H), 3.83 (s, 3H), 3.72 (t, *J* = 4.4 Hz, 4H), 3.07 (s, 3H), 2.95-2.94 (m, 7H), 2.62 (s, 3H). <sup>13</sup>C NMR (100 MHz, DMSO) δ 197.51, 168.66, 165.36, 152.58, 137.41, 136.26, 133.94, 133.08, 123.98, 122.92, 120.44, 66.73, 53.12, 52.27, 37.18, 35.73, 27.34. HRMS (ESI) Calcd for C<sub>19</sub>H<sub>24</sub>N<sub>2</sub>O<sub>5</sub> [M+H]<sup>+</sup> 361.1758; Found 361.1758. GC-MS (EI, 70 eV) *m/z* = 360([M]<sup>+</sup>, 1), 329(7), 315(22), 288(60), 274(37), 256(25), 244(24), 230(22), 214(22), 200(15), 184(9), 170(8), 156(8), 144(7), 128(10), 101(5).

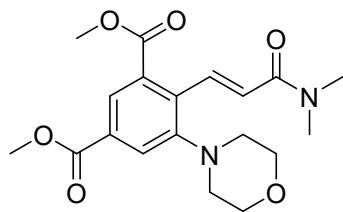

dimethyl (*E*)-4-(3-(dimethylamino)-3-oxoprop-1-en-1-yl)-5-morpholinoisophthalate **4j**

Yield 58%; yellow solid; mp: 224.6-224.8 °C; *E/Z* isomer > 99:1; purified by silica gel on column chromatography with petroleum ether/EtOAc = 1:1 (v/v). <sup>1</sup>H NMR (400 MHz, DMSO) δ 7.85 (d, *J* = 1.6 Hz, 1H), 7.72 (d, *J* = 1.6 Hz, 1H), 7.67 (d, *J* = 15.6 Hz, 1H), 6.90 (d, *J* = 15.6 Hz, 1H), 3.88 (s, 3H), 3.82 (s, 3H), 3.71 (t, *J* = 4.0 Hz, 4H), 3.07 (s, 3H), 2.93-2.92(m, 7H). <sup>13</sup>C NMR (100 MHz, DMSO) δ 168.26, 165.68, 165.36, 152.62, 136.13, 133.78, 133.61, 130.47, 124.20, 123.70, 121.66, 66.69, 53.15, 53.01, 52.21, 37.18, 35.73. HRMS (ESI) Calcd for C<sub>19</sub>H<sub>24</sub>N<sub>2</sub>O<sub>6</sub> [M+H]<sup>+</sup> 377.1707; Found 377.1708. GC-MS (EI, 70 eV) *m/z* = 376([M]<sup>+</sup>, 1), 345(10), 331(24), 317(4), 304(65), 290(38), 272(30), 260(25), 246(24), 228(12), 214(24), 187(9), 172(7), 156(10), 143(6), 128(11).

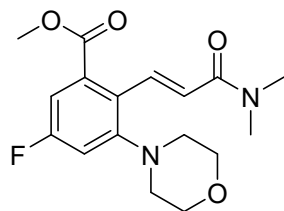

methyl (*E*)-2-(3-(dimethylamino)-3-oxoprop-1-en-1-yl)-5-fluoro-3-morpholinobenzoate **4k**

Yield 72%; yellow oil; *E/Z* isomer > 99:1; purified by silica gel on column chromatography with petroleum ether/EtOAc = 2:1 (v/v). <sup>1</sup>H NMR (400 MHz, CDCl<sub>3</sub>) δ 7.84 (d, *J* = 16.0 Hz, 1H), 7.02 (dd, *J* = 8.0, 2.4 Hz, 1H), 6.85 (dd, *J* = 10.0, 2.4 Hz, 1H), 6.76 (d, *J* = 16.0 Hz, 1H), 3.85 (s, 3H), 3.83 (t, *J* = 4.4 Hz, 4H), 3.12 (s, 3H), 3.06 (s, 3H), 2.95 (t, *J* = 4.4 Hz, 4H). <sup>13</sup>C NMR (100 MHz, CDCl<sub>3</sub>) δ 168.37 (d, *J* = 3.0 Hz), 166.43, δ 162.51 (d, *J* = 248.6 Hz) 154.10 (d, *J* = 8.2 Hz), 137.40, 134.43 (d, *J* = 8.7 Hz), 125.51 (d, *J* = 3.3 Hz), 121.99, 110.07 (d, *J* = 23.7 Hz), 108.61 (d, *J* = 22.4 Hz), 66.92, 52.72, 52.22, 37.27, 35.77. HRMS (ESI) Calcd for C<sub>17</sub>H<sub>21</sub>N<sub>2</sub>O<sub>4</sub>F [M+H]<sup>+</sup> 337.1558; Found 337.1559. GC-MS (EI, 70 eV) *m/z* = 336([M]<sup>+</sup>, 2), 305(7), 291(26), 264(64), 250(46), 232(38), 220(27), 206(29), 188(11), 174(19), 162(11), 147(17), 133(7), 120(7), 109(7).

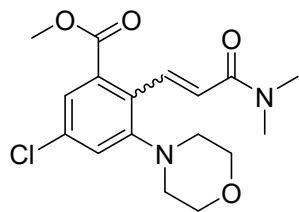

methyl-5-chloro-2-(3-(dimethylamino)-3-oxoprop-1-en-1-yl)-3-morpholinobenzoate **4l**

Yield 86%; yellow oil; *E/Z* isomer 99:1; purified by silica gel on column chromatography with petroleum ether/EtOAc = 2:1 (v/v). <sup>1</sup>H NMR (400 MHz, CDCl<sub>3</sub>) δ 7.84 (d, *J* = 16.0 Hz, 1H, *E*), 7.49 (d, *J* = 2.0 Hz, 1H, *Z*), 7.30 (d, *J* = 2.0 Hz, 1H, *E*), 7.11 (d, *J* = 2.0 Hz, 1H, *Z*), 7.09 (d, *J* = 2.4 Hz, 1H, *E*), 7.00 (d, *J* = 12.4 Hz, 1H, *Z*), 6.78 (d, *J* = 16.0 Hz, 1H, *E*), 6.30 (d, *J* = 12.4 Hz, 1H, *Z*), 3.85 (s, 3H, *E*), 3.84-3.81 (m, 7H, *E+Z*), 3.78 (t, *J* = 4.4 Hz, 4H, *Z*), 3.11 (s, 3H, *E*), 3.06 (s, 3H, *E*), 2.97 – 2.93 (m, 7H, *E+Z*), 2.84 (s, 3H, *Z*). <sup>13</sup>C NMR (101 MHz, CDCl<sub>3</sub>) δ 168.26 (*E*), 166.91 (*Z*), 166.62 (*Z*), 166.32 (*E*), 153.17 (*E*), 152.52 (*Z*), 137.24 (*E*), 134.74 (*E*), 134.64 (*Z*), 134.19 (*E*), 133.86 (*Z*), 132.23 (*Z*), 131.38 (*Z*), 127.94 (*E*), 124.44 (*Z*), 123.15 (*E*), 122.95 (*Z*), 122.44 (*E*), 121.47 (*E*), 66.95 (*E*), 52.74 (*E*), 52.23 (*E*), 37.52 (*Z*), 37.29 (*E*), 35.80 (*E*), 34.76 (*Z*). HRMS (ESI) Calcd for C<sub>17</sub>H<sub>21</sub>N<sub>2</sub>O<sub>4</sub>Cl [M+H]<sup>+</sup> 353.1263; Found 353.1262.

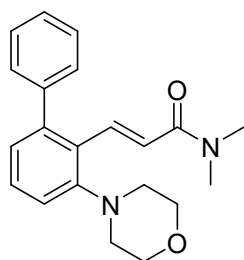

(*E*)-*N,N*-dimethyl-3-(3-morpholino-[1,1'-biphenyl]-2-yl)acrylamide **4m**

Yield 50%; white solid; mp: 166.2-166.4 °C; *E/Z* isomer > 99:1; purified by silica gel on column chromatography with petroleum ether/EtOAc = 1:1 (v/v). <sup>1</sup>H NMR (400 MHz, CDCl<sub>3</sub>) δ 7.87 (d, *J* = 16.0 Hz, 1H), 7.39-7.26 (m, 6H), 7.08 (dd, *J* = 8.0, 1.2 Hz, 1H), 6.99 (dd, *J* = 7.6, 0.8 Hz, 1H), 6.09 (d, *J* = 16.0 Hz, 1H), 3.89 (t, *J* = 4.4 Hz, 4H), 2.99 (t, *J* = 4.4 Hz, 4H), 2.91 (s, 3H), 2.49 (s, 3H). <sup>13</sup>C NMR (100 MHz, CDCl<sub>3</sub>) δ 166.85, 152.43, 143.01, 142.42, 137.97, 129.59, 128.85, 128.31, 126.81, 125.76, 123.48, 117.93, 67.30, 52.88, 36.63, 35.61. HRMS (ESI) Calcd for C<sub>21</sub>H<sub>24</sub>N<sub>2</sub>O<sub>2</sub> [M+H]<sup>+</sup> 337.1911; Found 337.1911. GC-MS (EI, 70 eV) *m/z* = 336([M]<sup>+</sup>, 7), 307(5), 291(14), 264(100), 250(33), 232(24), 220(46), 206(47), 193(8), 178(18), 165(12), 152(7), 102(9).

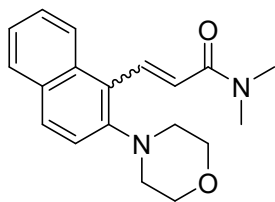

*N,N*-dimethyl-3-(2-morpholinonaphthalen-1-yl)acrylamide **4n**

Yield 74%; yellow oil; *E/Z* isomer 98:2; purified by silica gel on column chromatography with petroleum ether/EtOAc = 1:1(v/v). <sup>1</sup>H NMR (400 MHz, CDCl<sub>3</sub>) δ 8.25-8.20 (m, 2H, *E*), 7.82-7.78 (m, 2H, *E*), 7.49-7.45 (M, 1H, *E*), 7.41-7.37 (m, 1H, *E*), 7.33 (d, *J* = 8.8 Hz, 1H, *E*), 7.13 (d, *J* = 12.0 Hz, 1H, *Z*), 7.02 (d, *J* = 16.0 Hz, 1H, *E*), 6.49 (d, *J* = 12.0 Hz, 1H, *Z*), 3.87 (t, *J* = 4.4 Hz, 4H, *E*), 3.84 (t, *J* = 4.4 Hz, 4H, *Z*), 3.17 (s, 3H, *E*), 3.12 (s, 3H, *E*), 3.08 (t, *J* = 4.4 Hz, 4H, *Z*), 3.05 (t, *J* = 4.4 Hz, 4H, *E*), 2.91 (s, 3H, *Z*), 2.73 (s, 3H, *Z*). <sup>13</sup>C NMR (100 MHz, CDCl<sub>3</sub>) δ 167.35 (*Z*), 166.91 (*E*), 149.23 (*E*), 147.92 (*Z*), 138.68 (*E*), 134.55 (*Z*), 131.97 (*E*), 131.44 (*Z*), 130.62 (*Z*), 130.43 (*E*), 129.91 (*E*), 129.29 (*Z*), 128.49 (*E*), 128.41 (*Z*), 126.96 (*Z*), 126.84 (*E*), 126.07 (*Z*), 125.44 (*E*), 124.80 (*Z*), 124.50 (*E*), 124.24 (*E*), 123.93 (*Z*), 123.01 (*E*), 118.66 (*E*), 118.47 (*Z*), 67.39 (*E*), 52.58 (*E*), 52.46 (*Z*), 37.54 (*Z*), 37.45 (*E*), 35.92 (*E*), 34.68 (*Z*). HRMS (ESI) Calcd for C<sub>19</sub>H<sub>22</sub>N<sub>2</sub>O<sub>2</sub> [M+H]<sup>+</sup> 311.1754; Found 311.1754. GC-MS (EI, 70 eV) *m/z* = 311([M + H]<sup>+</sup>, 3), 310([M]<sup>+</sup>, 11), 265(19), 238(100), 224(26), 206(27), 246(20), 194(38), 180(57), 152(29), 72(41).

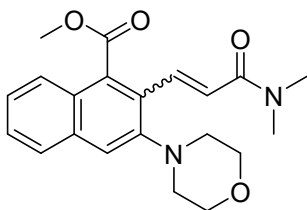

methyl-2-(3-(dimethylamino)-3-oxoprop-1-en-1-yl)-3-morpholino-1-naphthoate **4o**

Yield 78%; yellow oil; *E/Z* isomer 98:2; purified by silica gel on column chromatography with petroleum ether/EtOAc = 1:1(v/v). <sup>1</sup>H NMR (400 MHz, CDCl<sub>3</sub>) δ 8.01 (d, *J* = 15.6 Hz, 1H, *E*), 7.76 (d, *J* = 8.0 Hz, 1H, *E*), 7.66 (d, *J* = 8.0 Hz, 1H, *E*), 7.50-7.44 (m, 1H, *E*), 7.42-7.39(m, 2H, *E*), 7.37-7.34 (m, 2H, *Z*), 7.01 (d, *J* = 12.4 Hz, 1H, *Z*), 6.95 (d, *J* = 15.6 Hz, 1H, *E*), 6.33 (d, *J* = 12.0 Hz, 1H, *Z*), 3.95 (s, 3H, *E*), 3.94 (s, 3H, *Z*), 3.89 (t, *J* = 4.4 Hz, 4H, *E*), 3.84 (t, *J* = 4.4 Hz, 4H, *Z*), 3.15 (s, 3H, *E*), 3.11 (t, *J* = 4.4 Hz, 4H, *Z*), 3.08 (s, 3H, *E*), 3.04 (t, *J* = 4.4 Hz, 4H, *E*), 2.92 (s, 1H, *Z*), 2.86 (s, 1H, *Z*). <sup>13</sup>C NMR (100 MHz, CDCl<sub>3</sub>) δ 170.05 (*E*), 169.28 (*Z*), 166.67 (*Z*), 166.23 (*E*),



148.90 (*E*), 148.53 (*Z*), 138.91 (*E*), 135.36 (*E*), 133.96 (*E*), 132.26 (*E*), 128.30 (*E*), 127.33 (*E*), 127.18 (*E*), 126.59 (*Z*), 126.28 (*E*), 125.92 (*E*), 125.51 (*Z*), 124.97 (*Z*), 124.83 (*E*), 122.48 (*E*), 116.80 (*Z*), 116.72 (*E*), 67.14 (*E*), 67.08 (*Z*), 52.90 (*E*), 52.79 (*E*), 52.69 (*Z*), 52.21 (*Z*), 37.56 (*Z*), 37.32 (*E*), 35.83 (*E*), 34.73 (*Z*). HRMS (ESI) Calcd for C<sub>21</sub>H<sub>24</sub>N<sub>2</sub>O<sub>4</sub> [M+H]<sup>+</sup> 369.1807; Found 369.1807.

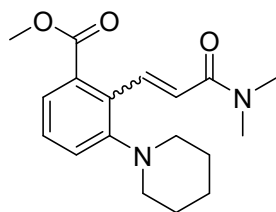

methyl-2-(3-(dimethylamino)-3-oxoprop-1-en-1-yl)-3-(piperidin-1-yl)benzoate **4p**

Yield 64%; yellow oil; *E/Z* isomer 99:1; purified by silica gel on column chromatography with petroleum ether/EtOAc = 2:1 (v/v). <sup>1</sup>H NMR (400 MHz, CDCl<sub>3</sub>) δ 7.94 (d, *J* = 160 Hz, 1H, *E*), 7.44 (d, *J* = 7.6 Hz, 1H, *Z*), 7.31-7.22 (m, 2H, *E*), 7.15-7.12 (m, 1H, *E*), 7.07 (d, *J* = 12.4 Hz, 1H, *Z*), 6.83 (d, *J* = 16.0 Hz, 1H, *E*), 6.23 (d, *J* = 12.4 Hz, 1H, *Z*), 3.84 (s, 3H, *E*), 3.81 (s, 3H, *Z*), 3.11 (s, 3H, *E*), 3.06 (s, 3H, *E*), 2.90-2.82 (m, 14H, *E+Z*), 1.73-1.67 (m, 4H, *E*), 1.65-1.61 (m, *J* = 4H, *Z*), 1.57-1.50 (m, 2H, *E*). <sup>13</sup>C NMR (100 MHz, CDCl<sub>3</sub>) δ 169.86 (*E*), 168.35 (*Z*), 167.03 (*Z*), 166.82 (*E*), 153.74 (*E*), 153.06 (*Z*), 138.56 (*E*), 135.43 (*Z*), 133.07 (*E*), 132.56 (*Z*), 131.15 (*Z*), 129.38 (*E*), 128.82 (*E*), 127.99 (*Z*), 123.74 (*Z*), 122.51 (*E*), 122.23 (*Z*), 121.94 (*Z*), 121.49 (*E*), 121.39 (*E*), 53.64 (*E*), 53.56 (*Z*), 52.41 (*E*), 51.88 (*Z*), 37.49 (*Z*), 37.27 (*E*), 35.75 (*E*), 34.67 (*Z*), 26.29 (*E*), 26.21 (*Z*), 24.23 (*Z*), 24.11 (*E*). HRMS (ESI) Calcd for C<sub>18</sub>H<sub>24</sub>N<sub>2</sub>O<sub>3</sub> [M+H]<sup>+</sup> 317.1860; Found 317.1860. GC-MS (EI, 70 eV) *m/z* = 316([M]<sup>+</sup>, 4), 271(45), 244(80), 228(100), 212(33), 198(29), 184(27), 156(20), 144(11), 128(20), 72(77).

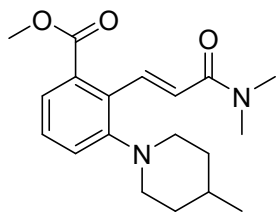

methyl (*E*)-2-(3-(dimethylamino)-3-oxoprop-1-en-1-yl)-3-(4-methylpiperidin-1-yl)benzoate **4q**

Yield 64%; yellow oil; *E/Z* isomer > 99:1; purified by silica gel on column chromatography with

petroleum ether/EtOAc = 2:1 (v/v).  $^1\text{H}$  NMR (400 MHz, DMSO)  $\delta$  7.68 (d,  $J$  = 15.6 Hz, 1H), 7.37 (t,  $J$  = 7.6 Hz, 1H), 7.24-7.19 (m, 2H), 6.81 (d,  $J$  = 16.0 Hz, 1H), 3.78 (s, 3H), 3.09 (s, 1H), 3.06 (s, 4H), 2.93 (s, 3H), 2.63-2.58 (m, 2H), 1.69-1.66 (m, 2H), 1.48-1.43 (m, 1H), 1.32-1.22 (m, 2H), 0.96 (d,  $J$  = 6.8 Hz, 3H).  $^{13}\text{C}$  NMR (100 MHz, DMSO)  $\delta$  169.58, 165.76, 153.42, 137.31, 133.65, 129.69, 128.45, 122.57, 121.96, 121.91, 52.88, 52.82, 37.13, 35.72, 34.70, 30.40, 22.31. HRMS (ESI) Calcd for  $\text{C}_{19}\text{H}_{26}\text{N}_2\text{O}_3$   $[\text{M}+\text{H}]^+$  331.2016; Found 331.2016. GC-MS (EI, 70 eV)  $m/z$  = 330( $[\text{M}]^+$ , 5), 315(3), 299(7), 285(38), 270(4), 258(78), 242(100), 226(30), 212(28), 198(19), 184(13), 156(22), 144(11), 129(17), 115(10), 102(8).

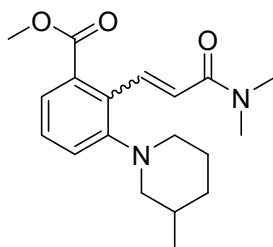

methyl-2-(3-(dimethylamino)-3-oxoprop-1-en-1-yl)-3-(3-methylpiperidin-1-yl)benzoate **4r**

Yield 62%; yellow oil; *E/Z* isomer 99:1; purified by silica gel on column chromatography with petroleum ether/EtOAc = 2:1 (v/v).  $^1\text{H}$  NMR (400 MHz,  $\text{CDCl}_3$ )  $\delta$  7.93 (d,  $J$  = 15.6 Hz, 1H, *E*), 7.45 (dd,  $J$  = 7.6, 0.8 Hz, 1H, *Z*), 7.31-7.22 (m, 2H, *E+Z*), 7.13 (dd,  $J$  = 7.6, 1.2 Hz, 1H, *E*), 7.07 (d,  $J$  = 12.4 Hz, 1H, *Z*), 6.82 (d,  $J$  = 15.6 Hz, 1H, *E*), 6.21 (d,  $J$  = 12.4 Hz, 1H, *Z*), 3.84 (s, 3H, *E*), 3.81 (s, 3H, *Z*), 3.11-2.81(m, 10H, *E*), 2.56-2.26(m, 10H, *Z*), 1.87-1.61 (m, 5H, *E*), 1.05-0.93 (m, 5H, *Z*), 0.90 (d,  $J$  = 6.4 Hz, 3H, *E*).  $^{13}\text{C}$  NMR (100 MHz,  $\text{CDCl}_3$ )  $\delta$  169.88 (*E*), 167.02(*Z*), 166.80 (*E*), 153.49 (*E*), 152.82 (*Z*), 138.58 (*E*), 135.33 (*Z*), 133.12 (*E*), 132.54 (*Z*), 131.16(*Z*), 129.45 (*E*), 128.83 (*E*), 128.01 (*Z*), 123.75 (*Z*), 122.54 (*E*), 122.36(*Z*), 121.96 (*Z*), 121.59 (*E*), 121.46(*E*), 60.46 (*E*), 53.42 (*E*), 53.22 (*Z*), 52.43 (*E*), 51.92 (*Z*), 37.51 (*Z*), 37.30 (*E*), 35.77 (*E*), 34.68 (*Z*), 32.86 (*Z*), 32.71 (*E*), 31.43 (*E*), 31.29 (*Z*), 25.77 (*E*), 25.70 (*Z*), 19.61 (*Z*), 19.48 (*E*). HRMS (ESI) Calcd for  $\text{C}_{19}\text{H}_{26}\text{N}_2\text{O}_3$   $[\text{M}+\text{H}]^+$  331.2016; Found 331.2016.

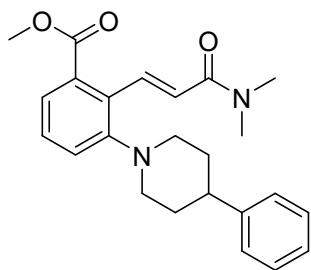

methyl (*E*)-2-(3-(dimethylamino)-3-oxoprop-1-en-1-yl)-3-(4-phenylpiperidin-1-yl)benzoate **4s**

Yield 45%; white solid; mp: 146.7-146.8 °C; *E/Z* isomer > 99:1; purified by silica gel on column chromatography with petroleum ether/EtOAc = 1:1 (v/v). <sup>1</sup>H NMR (400 MHz, CDCl<sub>3</sub>) δ 7.98 (d, *J* = 15.6 Hz, 1H), 7.34-7.24 (m, 6H), 7.23-7.17 (m, 2H), 6.84 (d, *J* = 16.0 Hz, 1H), 3.84 (s, 3H), 3.32 (d, *J* = 12.0 Hz, 2H), 3.12 (s, 3H), 3.05 (s, 3H), 2.82-2.73 (m, 2H), 2.66-2.58 (m, 1H), 1.96-1.90 (m, 4H). <sup>13</sup>C NMR (100 MHz, DMSO) δ 169.91, 166.70, 153.21, 145.95, 138.47, 133.28, 129.46, 128.93, 128.45, 126.94, 126.24, 122.80, 121.70, 121.52, 53.42, 52.48, 42.33, 37.34, 35.81, 33.70. HRMS (ESI) Calcd for C<sub>24</sub>H<sub>28</sub>N<sub>2</sub>O<sub>3</sub> [M+H]<sup>+</sup> 393.2173; Found 393.2173. GC-MS (EI, 70 eV) *m/z* = 392([M]<sup>+</sup>, 5), 347(34), 320(49), 304(67), 288(17), 274(18), 260(9), 216(23), 201(38), 188(17), 156(30), 143(14), 129(30), 115(25).

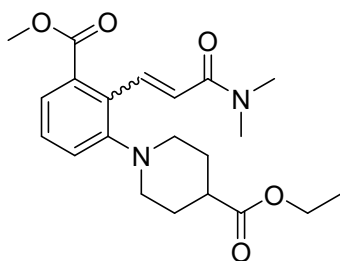

ethyl-1-(2-(3-(dimethylamino)-3-oxoprop-1-en-1-yl)-3-(methoxycarbonyl)phenyl)piperidine-4-carboxylate **4t**

Yield 62%; yellow oil; *E/Z* isomer 98:2; purified by silica gel on column chromatography with petroleum ether/EtOAc = 2:1 (v/v). <sup>1</sup>H NMR (400 MHz, CDCl<sub>3</sub>) δ 7.92 (d, *J* = 15.6 Hz, 1H, *E*), 7.48 (dd, *J* = 7.6, 0.8 Hz, 1H, *Z*), 7.31-7.26 (m, 2H, *E*), 7.14 (dd, *J* = 6.8, 2.4 Hz, 1H, *E*), 7.07 (d, *J* = 12.4 Hz, 1H, *Z*), 6.85 (d, *J* = 15.6 Hz, 1H, *E*), 6.27 (d, *J* = 12.4 Hz, 1H, *Z*), 4.18-4.12 (m, 4H, *E+Z*), 3.85 (s, 3H, *E*), 3.81 (s, 1H, *Z*), 3.23-3.19 (m, 2H, *E*), 3.12 (s, 3H, *E*), 3.06 (s, 3H, *E*), 2.97 (s, 3H, *Z*), 2.84 (s, 3H, *Z*), 2.71-2.65 (m, 2H, *E*), 2.44-2.36 (m, 1H, *Z*), 2.02-2.01 (m, 2H, *E*), 1.95 - 1.86 (m, 2H, *E*), 1.28 (d, *J* = 7.2 Hz, 3H, *E*). <sup>13</sup>C NMR (100 MHz, CDCl<sub>3</sub>) δ 175.27 (*Z*), 174.85

(*E*), 169.61 (*E*), 168.21 (*Z*), 166.82 (*Z*), 166.66 (*E*), 152.85 (*E*), 152.13 (*Z*), 138.25 (*E*), 135.69 (*Z*), 133.13 (*E*), 132.93 (*Z*), 131.12 (*Z*), 129.60 (*E*), 128.86 (*E*), 127.99 (*E*), 124.24 (*Z*), 123.09 (*E*), 122.31 (*Z*), 122.00 (*Z*), 121.79 (*E*), 121.59 (*E*), 60.43 (*E*), 60.38 (*Z*), 52.44 (*E*), 52.02 (*E*), 51.93 (*Z*), 51.89 (*Z*), 40.96 (*Z*), 40.78 (*E*), 37.50 (*Z*), 37.30 (*E*), 35.78 (*E*), 34.71 (*Z*), 28.62 (*Z*), 28.54 (*E*), 14.25 (*E*). HRMS (ESI) Calcd for C<sub>21</sub>H<sub>28</sub>N<sub>2</sub>O<sub>5</sub> [M+H]<sup>+</sup> 389.2071; Found 389.2071.

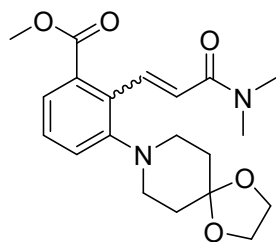

methyl-2-(3-(dimethylamino)-3-oxoprop-1-en-1-yl)-3-(1,4-dioxo-8-azaspiro[4.5]decan-8-yl)benzoate **4u**

Yield 78%; yellow oil; *E/Z* isomer 98:2; purified by silica gel on column chromatography with petroleum ether/EtOAc = 2:1 (v/v). <sup>1</sup>H NMR (400 MHz, CDCl<sub>3</sub>) δ 7.93 (d, *J* = 16.0 Hz, 1H, *E*), 7.49-7.47 (m, 2H, *Z*), 7.31-7.28 (m, 2H, *E*), 7.27-7.24 (m, 1H, *Z*), 7.20-7.16 (m, 1H, *E*), 6.85 (d, *J* = 15.6 Hz, 1H, *E*), 6.26 (d, *J* = 12.0 Hz, 1H, *Z*), 3.97 (s, 4H, *E*), 3.85 (s, 3H, *E*), 3.81 (s, 3H, *Z*), 3.11 (s, 3H, *E*), 3.05 (s, 3H, *E*), 3.03 (t, *J* = 5.2 Hz, 4H, *E*), 2.94 (s, 3H, *Z*), 2.83 (s, 3H, *Z*), 1.85 (t, *J* = 5.4 Hz, 4H, *E*), 1.81 (t, *J* = 5.4 Hz, 4H, *Z*). <sup>13</sup>C NMR (100 MHz, CDCl<sub>3</sub>) δ 169.50 (*E*), 168.20 (*Z*), 166.90 (*Z*), 166.68 (*E*), 152.57 (*E*), 151.94 (*Z*), 138.31 (*E*), 135.51 (*Z*), 132.93 (*E*), 132.80 (*Z*), 131.04 (*Z*), 129.64 (*E*), 128.83 (*E*), 128.03 (*Z*), 124.25 (*Z*), 123.11 (*E*), 122.54 (*Z*), 122.04 (*Z*), 121.80 (*E*), 121.72 (*E*), 107.03 (*Z*), 106.86 (*E*), 64.28 (*E*), 52.43 (*E*), 51.91 (*Z*), 50.43 (*E*), 50.37 (*Z*), 37.48 (*Z*), 37.30 (*E*), 35.48 (*Z*), 35.76 (*E*), 35.30 (*E*), 34.68 (*Z*). HRMS (ESI) Calcd for C<sub>20</sub>H<sub>26</sub>N<sub>2</sub>O<sub>5</sub> [M+H]<sup>+</sup> 375.1914; Found 375.1913.

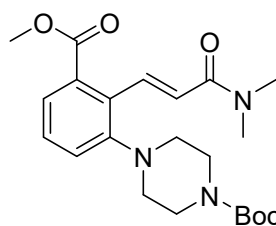

*tert*-butyl-(*E*)-4-(2-(3-(dimethylamino)-3-oxoprop-1-en-1-yl)-3-(methoxycarbonyl)phenyl)piperazine-1-carboxylate **4v**

Yield 61%; white solid; mp: 132.4-132.6 °C; *E/Z* isomer > 99:1; purified by silica gel on column chromatography with petroleum ether/EtOAc = 2:1 (v/v). <sup>1</sup>H NMR (400 MHz, CDCl<sub>3</sub>) δ 7.93 (d, *J* = 16.0 Hz, 1H), 7.35-7.29 (m, 2H), 7.13 (dd, *J* = 7.6, 2.0 Hz, 1H), 6.75 (d, *J* = 15.6 Hz, 1H), 3.84 (s, 3H), 3.57 (t, *J* = 4.4 Hz, 4H), 3.11 (s, 3H), 3.06 (s, 3H), 2.89 (b, 4H), 1.47 (s, 9H). <sup>13</sup>C NMR (100 MHz, CDCl<sub>3</sub>) δ 169.57, 166.51, 154.86, 152.09, 138.11, 133.11, 129.72, 129.02, 123.42, 122.28, 121.46, 79.79, 52.47, 51.66, 44.41, 43.44, 37.29, 35.75, 28.43. HRMS (ESI) Calcd for C<sub>22</sub>H<sub>31</sub>N<sub>3</sub>O<sub>5</sub> [M+H]<sup>+</sup> 418.2336; Found 418.2336.

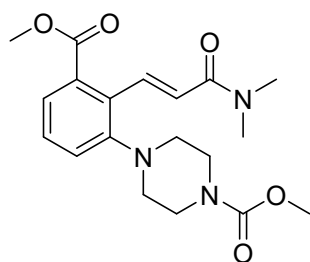

methyl-4-(2-(3-(dimethylamino)-3-oxoprop-1-en-1-yl)-3-(methoxycarbonyl)phenyl)piperazine-1-carboxylate **4w**

Yield 81%; yellow oil; *E/Z* isomer 99:1; purified by silica gel on column chromatography with petroleum ether/EtOAc = 2:1 (v/v). <sup>1</sup>H NMR (400 MHz, CDCl<sub>3</sub>) δ 7.93 (d, *J* = 15.6 Hz, 1H, *E*), 7.52 (d, *J* = 7.6 Hz, 1H, *Z*), 7.36-7.30 (m, 2H, *E*), 7.13 (dd, *J* = 6.4, 2.6 Hz, 1H, *E*), 7.07 (d, *J* = 12.4 Hz, 1H, *Z*), 6.75 (d, *J* = 16.0 Hz, 1H, *E*), 6.26 (d, *J* = 12.0 Hz, 1H, *Z*), 3.84 (s, 3H, *E*), 3.82 (s, 3H, *Z*), 3.71 (s, 3H, *E*), 3.62 (s, 4H, *E*), 3.11 (s, 3H, *E*), 3.06 (s, 3H, *E*), 2.95-2.87 (m, 7H, *E+Z*), 2.82 (s, 3H, *Z*). <sup>13</sup>C NMR (100 MHz, CDCl<sub>3</sub>) δ 169.47 (*E*), 167.97 (*Z*), 166.95 (*Z*), 166.43 (*E*), 155.97 (*E*), 151.92 (*E*), 151.31 (*Z*), 138.05 (*E*), 134.95 (*Z*), 133.08 (*E*), 132.92 (*Z*), 131.14 (*Z*), 129.80 (*E*), 129.03 (*E*), 128.23 (*Z*), 124.76 (*Z*), 123.57 (*E*), 122.75 (*Z*), 122.34 (*E*), 121.52 (*E*), 52.65 (*E*), 52.46 (*E*), 51.96 (*E*), 51.84 (*E*), 44.05 (*E*), 37.49 (*Z*), 37.27 (*E*), 35.73 (*E*), 34.66 (*Z*). HRMS (ESI) Calcd for C<sub>19</sub>H<sub>25</sub>N<sub>3</sub>O<sub>5</sub> [M+H]<sup>+</sup> 376.1867; Found 376.1867.

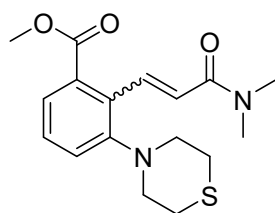

methyl-2-(3-(dimethylamino)-3-oxoprop-1-en-1-yl)-3-thiomorpholinobenzoate **4x**

Yield 40%; yellow oil; *E/Z* isomer 98:2; purified by silica gel on column chromatography with petroleum ether/EtOAc = 2:1 (v/v). <sup>1</sup>H NMR (400 MHz, CDCl<sub>3</sub>) δ 7.91 (d, *J* = 16.0 Hz, 1H, *E*), 7.50 (d, *J* = 7.6 Hz, 1H, *Z*), 7.35-7.31 (m, 2H, *E*), 7.30-7.27(m, 2H, *Z*), 7.15 (dd, *J* = 7.2, 2.1 Hz, 1H, *E*), 7.04 (d, *J* = 12.0 Hz, 1H, *Z*), 6.71 (d, *J* = 16.0 Hz, 1H, *E*), 6.28 (d, *J* = 12.4 Hz, 1H, *Z*), 3.84 (s, 3H, *E*), 3.81 (s, 3H, *Z*), 3.20-3.15 (m, 8H, *E+Z*), 3.12 (s, 3H, *E*), 3.06 (s, 3H, *E*), 2.94 (s, 3H, *Z*), 2.83 (s, 3H, *Z*), 2.78 (t, *J* = 4.8 Hz, 4H, *E*), 2.74 (t, *J* = 4.8 Hz, 4H, *Z*). <sup>13</sup>C NMR (100 MHz, CDCl<sub>3</sub>) δ 169.58 (*E*), 168.09 (*Z*), 166.89 (*Z*), 166.49 (*E*), 153.31 (*E*), 152.62(*Z*), 138.18 (*E*), 135.54 (*Z*), 133.22 (*Z*), 133.01 (*E*), 131.16 (*Z*), 130.16 (*E*), 129.00 (*E*), 128.17 (*Z*), 124.69 (*Z*), 123.52 (*E*), 123.10 (*Z*), 122.36 (*E*), 122.29 (*E*), 54.66 (*E*), 54.49 (*Z*), 52.48 (*E*), 51.94 (*Z*), 37.49 (*Z*), 37.30 (*E*), 35.78 (*E*), 34.73 (*Z*), 28.16 (*E*), 28.12 (*Z*). HRMS (ESI) Calcd for C<sub>17</sub>H<sub>22</sub>N<sub>2</sub>O<sub>3</sub>S [M+H]<sup>+</sup> 335.1424; Found 335.1424.

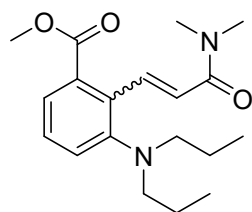

methyl 2-(3-(dimethylamino)-3-oxoprop-1-en-1-yl)-3-(dipropylamino)benzoate **4y**

Yield≈10%; yellow oil, *E/Z* isomer 10:1.1(By the <sup>1</sup>H spectrum integral ratio), purified by silica gel on column chromatography with petroleum ether/EtOAc = 2:1 (v/v). <sup>1</sup>H NMR (400 MHz, CDCl<sub>3</sub>) δ 7.93 (d, *J* = 16.0 Hz, 1H, *E*), 7.42 (d, *J* = 7.2 Hz, 1H, *Z*), 7.23 (m, 6H, *E+Z*), 7.09 (d, *J* = 12.0 Hz, 1H, *Z*), 6.69 (d, *J* = 16.0 Hz, 1H, *E*), 6.25 (d, *J* = 12.4 Hz, 1H, *Z*), 3.84 (s, 3H, *E*), 3.80 (s, 3H, *Z*), [3.07 (d, *J* = 13.9 Hz), 2.90 (s), 2.83 (s), 12H, *E+Z*] 2.95 (t, *J* = 7.6 Hz, 8H, *E+Z*), 1.49 – 1.39 (m, 8H, *E+Z*), 0.81 (t, *J* = 7.2 Hz, 12H, *E+Z*). <sup>13</sup>C NMR (100 MHz, CDCl<sub>3</sub>) δ 170.12 (*E*), 168.61 (*Z*), 166.75 (*E*), 151.37 (*E*), 150.59 (*Z*), 139.33 (*E*), 136.64 (*Z*), 133.49 (*E*), 132.06 (*Z*), 130.78 (*E*), 128.23 (*E*), 127.36 (*Z*), 124.51 (*Z*), 124.09 (*E*), 123.83 (*Z*), 122.52 (*E*), 121.84 (*Z*), 121.28 (*E*), 55.22 (*E*), 55.10 (*Z*), 52.43 (*E*), 51.87 (*Z*), 37.43 (*Z*), 37.26 (*E*) 35.77 (*E*), 34.75 (*Z*), 29.72 (*Z*), 20.17 (*Z*), 20.04 (*E*), 11.68 (*E*). HRMS (ESI) Calcd for C<sub>19</sub>H<sub>28</sub>N<sub>2</sub>O<sub>3</sub> [M+H]<sup>+</sup> 333.2173; Found 333.2182. GC-MS (EI, 70 eV) m/z = 332 ([M]<sup>+</sup>, 3), 303(11), 287(11), 258(15), 246(25), 230(31), 216(10), 200(23), 188(8), 72(100).

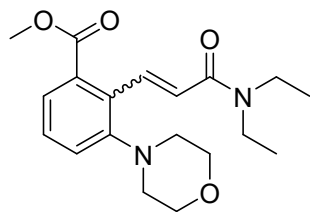

methyl-2-(3-(diethylamino)-3-oxoprop-1-en-1-yl)-3-morpholinobenzoate **4z**

Yield 94%; yellow oil; *E/Z* isomer 97:3; purified by silica gel on column chromatography with petroleum ether/EtOAc = 2:1 (v/v). <sup>1</sup>H NMR (400 MHz, CDCl<sub>3</sub>) δ 7.98 (d, *J* = 15.6 Hz, 1H, *E*), 7.37-7.29 (m, 2H, *E*), 7.16 (dd, *J* = 7.6, 2.0 Hz, 1H, *E*), 7.11 (d, *J* = 12.0 Hz, 1H, *Z*), 6.70 (d, *J* = 16.0 Hz, 1H, *E*), 6.26 (d, *J* = 12.0 Hz, 1H, *Z*), 3.86-3.82 (m, 7H, *E*), 3.80 (s, 3H, *Z*), 3.78 (t, *J* = 4.4 Hz, 4H, *Z*), 3.49 (q, *J* = 7.2 Hz, 2H, *E*), 3.41 (q, *J* = 6.8 Hz, 2H, *E*), 2.96 (t, *J* = 4.4 Hz, 4H, *E*), 1.25-1.17 (m, 6H, *E*), 1.04-0.94 (m, 6H, *Z*). <sup>13</sup>C NMR (100 MHz, CDCl<sub>3</sub>) δ 169.54 (*E*), 165.63 (*E*), 152.09 (*E*), 138.13 (*E*), 136.58 (*Z*), 133.68 (*Z*), 133.15 (*E*), 129.92 (*Z*), 129.78 (*E*), 128.95 (*E*), 128.27 (*Z*), 128.03 (*Z*), 124.80 (*Z*), 123.36 (*E*), 122.66 (*E*), 122.27 (*Z*), 121.20 (*E*), 67.33 (*Z*), 67.13 (*E*), 52.44 (*E*), 52.41 (*E*), 51.93 (*Z*), 42.03 (*E*), 40.80 (*E*), 39.46 (*Z*), 15.06 (*E*), 14.26 (*Z*), 13.22 (*E*), 12.84 (*Z*). HRMS (ESI) Calcd for C<sub>19</sub>H<sub>26</sub>N<sub>2</sub>O<sub>4</sub> [M+H]<sup>+</sup> 347.1965; Found 347.1965. GC-MS (EI, 70 eV) *m/z* = 346([M]<sup>+</sup>, 1), 315(5), 273(17), 256(6), 246(69), 232(76), 214(39), 200(22), 188(26), 170(12), 156(25), 144(15), 129(22), 115(85), 100(100).

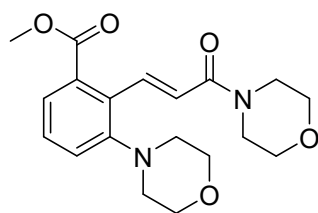

methyl (*E*)-3-morpholino-2-(3-morpholino-3-oxoprop-1-en-1-yl)benzoate **4aa**

Yield 82%; white solid; mp: 153.5-153.6 °C; *E/Z* isomer > 99:1; purified by silica gel on column chromatography with petroleum ether/EtOAc = 2:1 (v/v). <sup>1</sup>H NMR (400 MHz, CDCl<sub>3</sub>) δ 7.95 (d, *J* = 15.6 Hz, 1H), 7.38-7.31 (m, 2H), 7.17 (dd, *J* = 6.8, 1.6 Hz, 1H), 6.75 (d, *J* = 15.6 Hz, 1H), 3.84-3.82 (m, 7H), 3.73 (b, 6H), 3.61 (b, 2H), 2.96 (t, *J* = 4.4 Hz, 4H). <sup>13</sup>C NMR (100 MHz, CDCl<sub>3</sub>) δ 169.43, 165.50, 152.04, 138.85, 133.02, 129.44, 129.18, 123.45, 121.43, 121.33, 67.12, 66.86, 52.48, 52.41, 46.16, 42.42. HRMS (ESI) Calcd for C<sub>19</sub>H<sub>24</sub>N<sub>2</sub>O<sub>5</sub> [M+H]<sup>+</sup> 361.1758; Found 361.1759. GC-MS (EI, 70 eV) *m/z* = 360([M]<sup>+</sup>, 2), 329(11), 317(2), 301(4), 285(3), 273(48),

246(97), 232(100), 214(60), 202(35), 188(40), 170(15), 156(35), 144(17), 129(47), 114(45), 102(12).

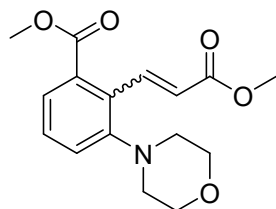

methyl-2-(3-methoxy-3-oxoprop-1-en-1-yl)-3-morpholinobenzoate **4ab**

Yield 86%; yellow oil; *E/Z* isomer 98:2; purified by silica gel on column chromatography with petroleum ether/EtOAc = 2:1(v/v). <sup>1</sup>H NMR (400 MHz, CDCl<sub>3</sub>) δ 8.07 (d, *J* = 16.4 Hz, 1H, *E*), 7.62 (d, *J* = 7.6 Hz, 1H, *Z*), 7.37 (s, 1H, *E*), 7.36 (d, *J* = 1.6 Hz, 1H, *E*), 7.34 (s, 1H, *Z*), 7.32 (d, *J* = 3.6 Hz, 1H, *Z*), 7.20-7.17 (m, 1H, *E*), 6.33 (d, *J* = 16.4 Hz, 1H, *E*), 6.04 (d, *J* = 12.4 Hz, 1H, *Z*), 3.86 (s, 3H, *E*), 3.83-3.81 (m, 7H, *E*), 3.74 (t, *J* = 4.4 Hz, 4H, *Z*), 3.54 (s, 3H, *Z*), 2.93 (t, *J* = 4.4 Hz, 4H, *E*), 2.89 (t, *J* = 4.4 Hz, 4H, *Z*). <sup>13</sup>C NMR (100 MHz, CDCl<sub>3</sub>) δ 168.94 (*E*), 167.71 (*Z*), 167.18 (*E*), 166.40 (*Z*), 152.20 (*E*), 151.29 (*Z*), 141.29 (*E*), 141.07 (*Z*), 133.09 (*E*), 132.55 (*Z*), 130.67 (*Z*), 129.64 (*E*), 128.71 (*E*), 128.56 (*Z*), 124.78 (*Z*), 123.85 (*E*), 122.53 (*Z*), 122.07 (*E*), 121.69 (*E*), 120.21 (*Z*), 67.10 (*Z*), 66.99 (*E*), 52.52 (*E*), 52.33 (*Z*), 52.05 (*Z*), 51.75 (*E*), 51.07 (*Z*). HRMS (ESI) Calcd for C<sub>16</sub>H<sub>19</sub>NO<sub>5</sub> [M+H]<sup>+</sup> 306.1336; Found 306.1336. GC-MS (EI, 70 eV) *m/z* = 306([M + H]<sup>+</sup>, 8), 305([M]<sup>+</sup>, 41), 274(37), 246(50), 231(21), 214(37), 202(26), 188(100), 170(22), 156(52), 144(23), 129(24), 115(10).

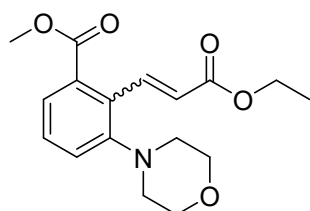

methyl-2-(3-ethoxy-3-oxoprop-1-en-1-yl)-3-morpholinobenzoate **4ac**

Yield 80%; yellow oil; *E/Z* isomer 98:2; purified by silica gel on column chromatography with petroleum ether/EtOAc = 2:1 (v/v). <sup>1</sup>H NMR (400 MHz, CDCl<sub>3</sub>) δ 8.06 (d, *J* = 16.4 Hz, 1H, *E*), 7.61 (d, *J* = 8.0 Hz, 2H, *Z*), 7.36 (d, *J* = 4.4 Hz, 2H, *E*), 7.18 (t, *J* = 4.4 Hz, 1H, *E*), 6.30 (d, *J* = 16.4 Hz, 1H, *E*), 6.02 (d, *J* = 12.0 Hz, 1H, *Z*), 4.26 (q, *J* = 6.8 Hz, 2H, *E*), 3.97 (q, *J* = 7.2 Hz, 2H,



Z), 3.86 (s, 3H, *E*), 3.82 (s, 7H, *E*+*Z*), 3.74 (d, *J* = 3.2 Hz, 4H, *Z*), 2.93 (s, 4H, *E*), 2.89 (s, 4H, *Z*), 1.33 (t, *J* = 7.2 Hz, 3H, *E*), 1.06 (t, *J* = 6.8 Hz, 3H, *Z*). <sup>13</sup>C NMR (100 MHz, CDCl<sub>3</sub>) δ 168.99 (*E*), 166.67 (*Z*), 166.67 (*E*), 165.96 (*Z*), 152.14 (*E*), 151.21 (*Z*), 140.92 (*E*), 133.11 (*E*), 132.84 (*Z*), 130.69 (*Z*), 129.57 (*E*), 128.63 (*E*), 128.40 (*Z*), 124.67 (*Z*), 123.74 (*E*), 122.48 (*E*), 121.57 (*E*), 120.65 (*Z*), 67.08 (*Z*), 66.96 (*E*), 60.45 (*E*), 59.86 (*Z*), 52.49 (*E*), 52.45 (*E*), 52.30 (*Z*), 51.99 (*Z*), 14.31 (*E*), 13.88 (*Z*). HRMS (ESI) Calcd for C<sub>17</sub>H<sub>21</sub>NO<sub>5</sub> [M+H]<sup>+</sup> 320.1492; Found 320.1491. GC-MS (EI, 70 eV) *m/z* = 320([M + H]<sup>+</sup>, 8), 319([M]<sup>+</sup>, 39), 304(5), 288(29), 274(14), 260(8), 246(59), 231(28), 214(50), 202(40), 188(100), 170(32), 156(58), 144(26), 129(30), 115(12).

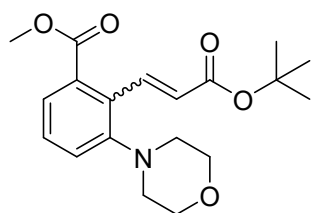

methyl-2-(3-(*tert*-butoxy)-3-oxoprop-1-en-1-yl)-3-morpholinobenzoate **4ad**

Yield 75%; yellow oil; *E/Z* isomer 97:3; purified by silica gel on column chromatography with petroleum ether/EtOAc = 2:1 (v/v). <sup>1</sup>H NMR (400 MHz, CDCl<sub>3</sub>) δ 7.95 (d, *J* = 16.4 Hz, 1H, *E*), 7.35-7.32 (m, 2H, *E*), 7.16 (dd, *J* = 6.4, 2.8 Hz, 1H, *E*), 6.20 (d, *J* = 16.4 Hz, 1H, *E*), 5.93 (d, *J* = 12.4 Hz, 1H, *Z*), 3.86 (s, 3H, *E*), 3.84-3.81 (m, 7H, *E*+*Z*), 2.94 (t, *J* = 4.4 Hz, 4H, *E*), 1.53 (s, 9H, *E*), 1.22 (s, 9H, *Z*). <sup>13</sup>C NMR (100 MHz, CDCl<sub>3</sub>) δ 169.22 (*E*), 167.78 (*Z*), 165.99 (*E*), 165.21 (*Z*), 152.07 (*E*), 150.99 (*Z*), 140.32 (*Z*), 139.71 (*E*), 133.45 (*Z*), 133.19 (*E*), 129.41 (*E*), 128.78 (*E*), 128.19 (*Z*), 124.69 (*Z*), 124.41 (*E*), 123.67 (*E*), 122.71 (*Z*), 122.36 (*Z*), 121.45 (*E*), 80.45 (*E*), 80.00 (*Z*), 67.23 (*Z*), 67.03 (*Z*), 52.49 (*E*), 52.42 (*E*), 52.32 (*Z*), 51.96 (*Z*), 28.24 (*E*), 27.77 (*Z*). HRMS (ESI) Calcd for C<sub>19</sub>H<sub>25</sub>NO<sub>5</sub> [M+H]<sup>+</sup> 348.1805; Found 348.1805. GC-MS (EI, 70 eV) *m/z* = 348([M + H]<sup>+</sup>, 6), 347([M]<sup>+</sup>, 25), 291(37), 274(20), 260(13), 246(100), 232(37), 214(47), 202(37), 188(85), 170(14), 156(37), 144(19), 129(28).

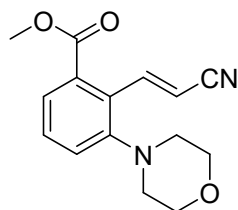

methyl (*E*)-2-(2-cyanovinyl)-3-morpholinobenzoate **4ae**

Yield 68%; white solid; mp: 105.3-105.4 °C; *E/Z* isomer > 99:1; purified by silica gel on column chromatography with petroleum ether/EtOAc = 2:1 (v/v). <sup>1</sup>H NMR (400 MHz, CDCl<sub>3</sub>) δ 7.73-7.67 (m, 2H), 7.42 (t, *J* = 8.0 Hz, 1H), 7.32 (d, *J* = 8.0 Hz, 1H), 5.61 (d, *J* = 11.6 Hz, 1H), 3.89 (s, 3H), 3.81 (t, *J* = 4.4 Hz, 4H), 2.94 (t, *J* = 4.4 Hz, 4H). <sup>13</sup>C NMR (100 MHz, CDCl<sub>3</sub>) δ 167.03, 151.99, 147.59, 130.50, 129.96, 125.46, 123.84, 122.99, 116.63, 100.21, 67.08, 52.42, 52.14. HRMS (ESI) Calcd for C<sub>15</sub>H<sub>16</sub>N<sub>2</sub>O<sub>3</sub> [M+H]<sup>+</sup> 273.1234; Found 273.1234. GC-MS (EI, 70 eV) *m/z* = 273([M + H]<sup>+</sup>, 17), 272([M]<sup>+</sup>, 100), 241(44), 213(33), 200(72), 187(88), 182(33), 154(57), 128(33), 101(25), 91(11).

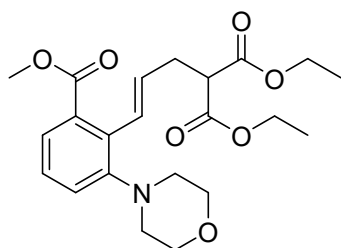

diethyl (*E*)-2-(3-(2-(methoxycarbonyl)-6-morpholinophenyl)allyl)malonate **4af**

Yield 65%; white solid; mp: 94.1-94.3 °C; *E/Z* isomer > 99:1; purified by silica gel on column chromatography with petroleum ether/EtOAc = 1:1 (v/v). <sup>1</sup>H NMR (400 MHz, CDCl<sub>3</sub>) δ 7.27-7.20 (m, 2H), 7.09 (dd, *J* = 7.6, 1.6 Hz, 1H), 6.78 (d, *J* = 16.0 Hz, 1H), 5.91-5.83 (m, 1H), 4.26-4.15 (m, 4H), 3.84 (s, 3H), 3.81 (t, *J* = 4.4 Hz, 4H), 3.44 (t, *J* = 7.6 Hz, 1H), 2.92 (t, *J* = 4.4 Hz, 4H), 2.82-2.78 (m, 2H), 1.27 (t, *J* = 7.2 Hz, 6H). <sup>13</sup>C NMR (100 MHz, CDCl<sub>3</sub>) δ 170.17, 168.82, 151.21, 133.29, 131.02, 129.93, 128.52, 127.76, 123.22, 120.90, 67.25, 61.53, 52.22, 52.14, 51.75, 32.76, 14.09. HRMS (ESI) Calcd for C<sub>22</sub>H<sub>29</sub>NO<sub>7</sub> [M+H]<sup>+</sup> 420.2017; Found 420.2017. GC-MS (EI, 70 eV) *m/z* = 421([M + H]<sup>+</sup>, 3), 420([M]<sup>+</sup>, 17), 419(67), 404(7), 388(14), 374(21), 362(16), 346(18), 328(9), 268(23), 260(17), 246(54), 228(100), 214(45), 202(98), 188(100), 169(55), 156(41), 144(29), 128(38).

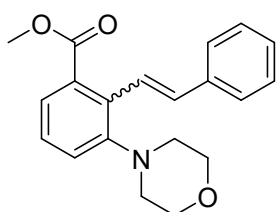

methyl-3-morpholino-2-styrylbenzoate **4ag**

Yield 62%; yellow oil; *E/Z* isomer 98:2; purified by silica gel on column chromatography with petroleum ether/EtOAc = 10:1 (v/v). <sup>1</sup>H NMR (400 MHz, CDCl<sub>3</sub>) δ 7.50-7.42 (m, 3H, *E*), 7.36 (t, *J* = 7.2 Hz, 2H, *E*), 7.33-7.25 (m, 3H, *E*), 7.14 (dd, *J* = 7.6, 2.0 Hz, 1H, *E*), 6.88 (d, *J* = 16.8 Hz, 1H, *E*), 6.58 (d, *J* = 12.4 Hz, 1H, *Z*), 3.83-3.79 (m, 7H, *E*), 3.65 (s, 3H, *Z*), 2.98 (t, *J* = 4.4 Hz, 4H, *E*). <sup>13</sup>C NMR (100 MHz, CDCl<sub>3</sub>) δ 170.31 (*E*), 151.54 (*E*), 137.67 (*E*), 132.98 (*E*), 132.76 (*E*), 132.31 (*Z*), 131.33 (*E*), 129.96 (*Z*), 128.82 (*E*), 128.17 (*Z*), 127.99 (*Z*), 127.90 (*E*), 127.81 (*E*), 127.05 (*Z*), 126.39 (*E*), 124.59 (*E*), 124.28 (*Z*), 123.57 (*E*), 122.23 (*Z*), 121.06 (*E*), 67.31 (*E*), 67.02 (*Z*), 52.37 (*E*), 52.30 (*E*), 52.00 (*Z*), 51.93 (*Z*). HRMS (ESI) Calcd for C<sub>20</sub>H<sub>21</sub>NO<sub>3</sub> [M+H]<sup>+</sup> 324.1594; Found 324.1593. GC-MS (EI, 70 eV) m/z = 324([M + H]<sup>+</sup>, 22), 323([M]<sup>+</sup>, 100), 308(10), 292(50), 264(58), 250(17), 232(51), 204(34), 188(14), 178(11), 146(9), 117(20), 102(22).

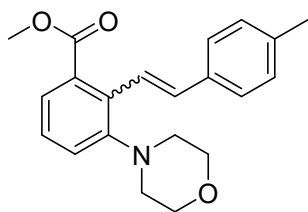

methyl-2-(4-methylstyryl)-3-morpholinobenzoate **4ah**

Yield 68%; yellow oil; *E/Z* isomer 2:1; purified by silica gel on column chromatography with petroleum ether/EtOAc = 10:1 (v/v). <sup>1</sup>H NMR (400 MHz, CDCl<sub>3</sub>) δ 7.37-7.28 (m, 4H, *E+Z*), 7.24-7.15 (m, 7H, *E+Z*), 7.10-6.99 (m, 5H, *E+Z*), 6.77 (d, *J* = 16.8 Hz, 2H, *E+Z*), 3.73-3.71 (m, 14H, *E+Z*), 2.90-2.87 (m, 8H, *E+Z*), 2.28 (d, *J* = 8.0 Hz, 6H, *E+Z*). <sup>13</sup>C NMR (100 MHz, CDCl<sub>3</sub>, *E+Z*) δ 170.41, 170.33, 151.52, 151.48, 138.37, 137.74, 137.64, 134.93, 133.00, 132.98, 132.90, 132.69, 131.43, 131.39, 129.52, 128.71, 128.64, 127.83, 127.73, 127.24, 126.32, 124.37, 123.57, 123.53, 123.51, 123.43, 121.00, 120.96, 67.31, 52.36, 52.33, 52.28, 52.27, 21.51, 21.29. HRMS (ESI) Calcd for C<sub>21</sub>H<sub>23</sub>NO<sub>3</sub> [M+H]<sup>+</sup> 338.1751; Found 338.1751. GC-MS (EI, 70 eV) m/z = 338([M + H]<sup>+</sup>, 24), 337([M]<sup>+</sup>, 100), 322(8), 306(42), 278(54), 264(26), 246(32), 219(26), 200(27), 188(12), 115(10), 105(33).

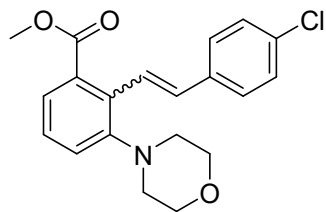

methyl (*E*)-2-(4-chlorostyryl)-3-morpholinobenzoate **4ai**

Yield 73%; yellow oil; *E/Z* isomer 98:2; purified by silica gel on column chromatography with petroleum ether/EtOAc = 5:1 (v/v). <sup>1</sup>H NMR (400 MHz, CDCl<sub>3</sub>) δ 7.50 (dd, *J* = 7.6, 0.8 Hz, 1H, *Z*), 7.44-7.40 (m, 3H, *E*), 7.35-7.25 (m, 4H, *E*), 7.15 (dd, *J* = 8.0, 1.2 Hz, 1H, *E*), 7.10-7.05 (m, 4H, *Z*), 6.88-6.83 (m, 1H, *E*), 6.52 (d, *J* = 12.0 Hz, 1H, *Z*), 3.82-3.77 (m, 7H, *E*), 3.70 (s, 3H, *Z*), 2.97 (t, *J* = 4.4 Hz, 4H, *E*). <sup>13</sup>C NMR (100 MHz, CDCl<sub>3</sub>) δ 170.02 (*E*), 168.11 (*Z*), 151.60 (*E*), 151.51 (*Z*), 136.23 (*Z*), 136.18 (*E*), 133.40 (*E*), 132.83 (*E*), 132.57 (*Z*), 132.47 (*Z*), 131.41 (*E*), 131.16 (*E*), 129.39 (*Z*), 128.99 (*E*), 128.49 (*Z*), 128.24 (*Z*), 128.07 (*E*), 127.53 (*E*), 127.18 (*Z*), 125.30 (*E*), 124.44 (*Z*), 123.73 (*E*), 122.39 (*Z*), 121.24 (*E*), 67.27 (*E*), 67.00 (*Z*), 52.36 (*E*), 52.31 (*E*), 52.07 (*Z*), 51.94(*Z*). HRMS (ESI) Calcd for C<sub>20</sub>H<sub>20</sub>ClNO<sub>3</sub> [M+H]<sup>+</sup> 358.1204; Found 358.1204. GC-MS (EI, 70 eV) *m/z* = 358([M + H]<sup>+</sup>, 24), 357([M]<sup>+</sup>, 100), 342(11), 326(56), 298(63), 284(22), 266(48), 239(41), 232(18), 200(57), 188(24), 176(28), 127(23), 125(60), 102(42).

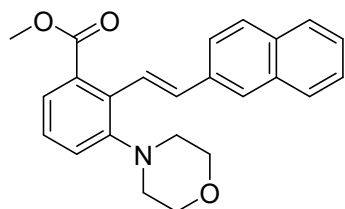

methyl (*E*)-3-morpholino-2-(2-(naphthalen-2-yl)vinyl)benzoate **4aj**

Yield 78%; yellow oil; *E/Z* isomer > 99:1; purified by silica gel on column chromatography with petroleum ether/EtOAc = 5:1 (v/v). <sup>1</sup>H NMR (400 MHz, CDCl<sub>3</sub>) δ 7.86-7.74 (m, 5H), 7.57 (d, *J* = 16.8 Hz, 1H), 7.50-7.42 (m, 2H), 7.36-7.27 (m, 2H), 7.15 (dd, *J* = 7.6, 1.2 Hz, 1H), 7.06 (d, *J* = 16.4 Hz, 1H), 3.84-3.80 (m, 7H), 3.00 (t, *J* = 4.4 Hz, 4H). <sup>13</sup>C NMR (100 MHz, CDCl<sub>3</sub>) δ 170.38, 151.61, 135.18, 133.74, 133.16, 132.99, 132.89, 131.39, 128.55, 128.09, 127.97, 127.78, 126.67, 126.48, 126.09, 125.01, 123.66, 123.20, 121.13, 67.35, 52.44, 52.34. HRMS (ESI) Calcd for C<sub>24</sub>H<sub>23</sub>NO<sub>3</sub> [M+H]<sup>+</sup> 374.1751; Found 374.1751. GC-MS (EI, 70 eV) *m/z* = 374([M + H]<sup>+</sup>, 27), 373([M]<sup>+</sup>, 100), 358(11), 342(36), 328(7), 314(50), 300(17), 282(39), 254(51), 226(19), 200(46),

188(16), 141(61), 127(45), 113(21).

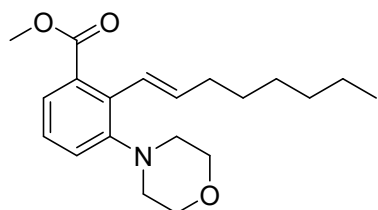

methyl (*E*)-3-morpholino-2-(oct-1-en-1-yl)benzoate **4ak**

Yield 58%; colorless oil; *E/Z* isomer > 99:1; purified by silica gel on column chromatography with petroleum ether/EtOAc = 10:1 (v/v). <sup>1</sup>H NMR (400 MHz, CDCl<sub>3</sub>) δ 7.19-7.11 (m, 2H), 7.00 (dd, *J* = 7.2, 1.6 Hz, 1H), 6.58-6.54 (m, 1H), 5.85-5.78 (m, 1H), 3.75-3.72 (m, 7H), 2.87 (t, *J* = 4.4 Hz, 4H), 2.15-2.09 (m, 2H), 1.38-1.33 (m, 2H), 1.28-1.20 (m, 6H), 0.84-0.80 (m, 3H). <sup>13</sup>C NMR (100 MHz, CDCl<sub>3</sub>) δ 169.62, 149.94, 134.36, 132.28, 130.84, 126.24, 124.48, 122.03, 119.64, 66.20, 51.07, 51.03, 32.66, 30.76, 28.30, 27.98, 21.64, 13.09. HRMS (ESI) Calcd for C<sub>20</sub>H<sub>29</sub>NO<sub>3</sub> [M+H]<sup>+</sup> 332.2220; Found 332.2220. GC-MS (EI, 70 eV) *m/z* = 332 ([M + H]<sup>+</sup>, 16), 331 ([M]<sup>+</sup>, 56), 316 ([M - CH<sub>3</sub>]<sup>+</sup>, 9), 300(41), 286(11), 274(8), 246(20), 216(28), 200(30), 188(100), 170(11), 144(27), 115(14).

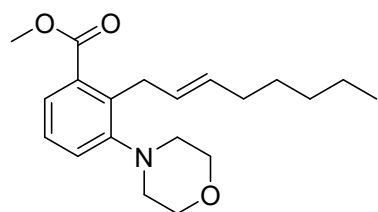

methyl (*E*)-3-morpholino-2-(oct-2-en-1-yl)benzoate **4ak**

purified by silica gel on column chromatography with petroleum ether/EtOAc = 10:1 (v/v). <sup>1</sup>H NMR (400 MHz, CDCl<sub>3</sub>) δ 7.56-7.50 (m, 1H), 7.37-7.12 (m, 2H), 5.70-5.33 (m, 2H), 3.85-3.83 (m, 9H), 2.88-2.86 (m, 4H), 1.36-1.20 (m, 6H), 0.89 – 0.84 (m, 3H). <sup>13</sup>C NMR (100 MHz, CDCl<sub>3</sub>) δ 168.94, 152.28, 137.47, 132.62, 131.21, 129.16, 126.65, 126.07, 124.24, 77.37, 77.05, 76.74, 67.44, 53.38, 52.02, 32.60, 31.43, 30.49, 29.28, 22.54, 14.07. HRMS (ESI) Calcd for C<sub>20</sub>H<sub>29</sub>NO<sub>3</sub> [M+H]<sup>+</sup> 332.2220; Found 332.2221. GC-MS (EI, 70 eV) *m/z* = 332 ([M + H]<sup>+</sup>, 14), 331 ([M]<sup>+</sup>, 58), 316 ([M - CH<sub>3</sub>]<sup>+</sup>, 6), 300(37), 274(33), 246(37), 216(32), 203(46), 188(100), 175(29), 144(50), 130(24), 115(19).

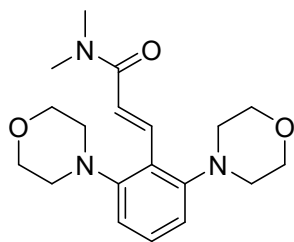

*(E)*-3-(2,6-dimorpholinophenyl)-*N,N*-dimethylacrylamide **4al**

Yield 33%; yellow solid; mp: 173.3-173.5 °C; purified by silica gel on column chromatography with petroleum ether/EtOAc = 2:1 (v/v). <sup>1</sup>H NMR (400 MHz, DMSO) δ 7.88 (d, *J* = 15.6 Hz, 1H), 7.68 (d, *J* = 16.0 Hz, 1H), 7.29 (t, *J* = 8.0 Hz, 1H), 6.90 (d, *J* = 8.0 Hz, 2H), 3.75-3.68 (m, 8H), 3.16 (s, 3H), 2.95 (s, 3H), 2.86-2.80 (m, 8H). <sup>13</sup>C NMR (100 MHz, DMSO) δ 166.94, 153.81, 136.73, 130.60, 122.94, 119.78, 115.10, 66.96, 52.99, 37.37, 35.84. HRMS (ESI) Calcd for C<sub>19</sub>H<sub>27</sub>N<sub>3</sub>O<sub>3</sub> [M+H]<sup>+</sup> 346.2125; Found 346.2112.

## 5. $^1\text{H}$ , $^{13}\text{C}$ NMR, GC, GC-MS and HRMS of 4y spectra

$^1\text{H}$  NMR Spectrum of 1a

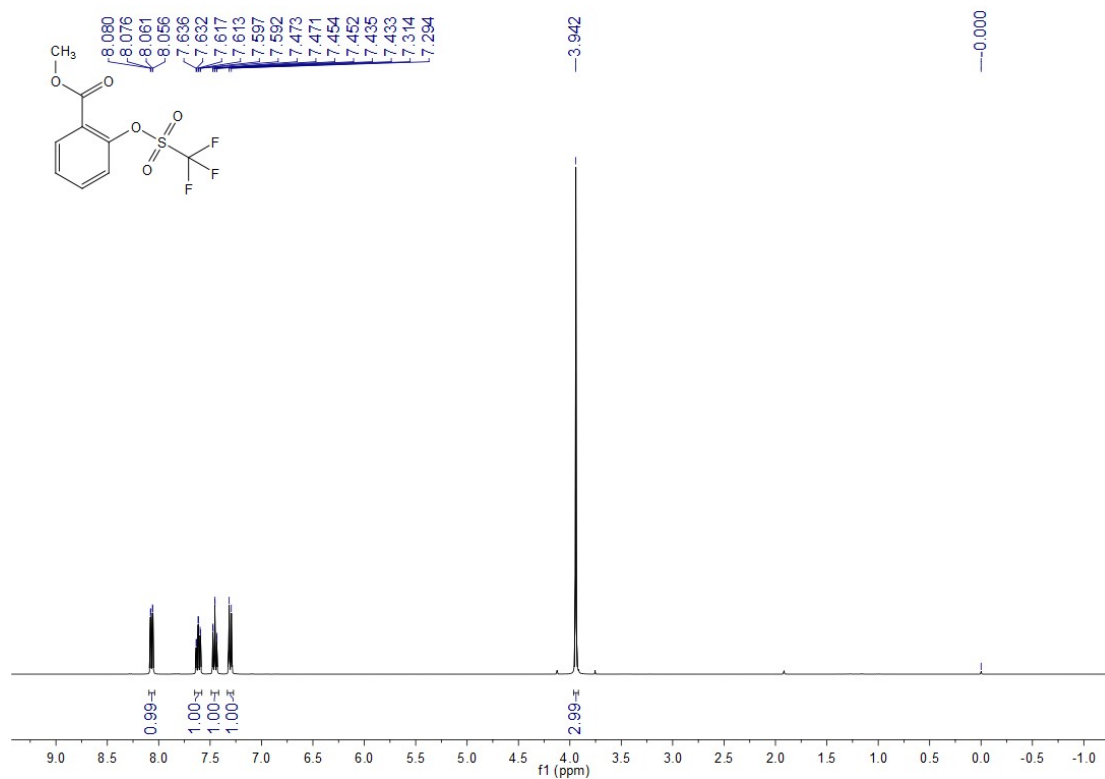

$^{13}\text{C}$  NMR Spectrum of 1a

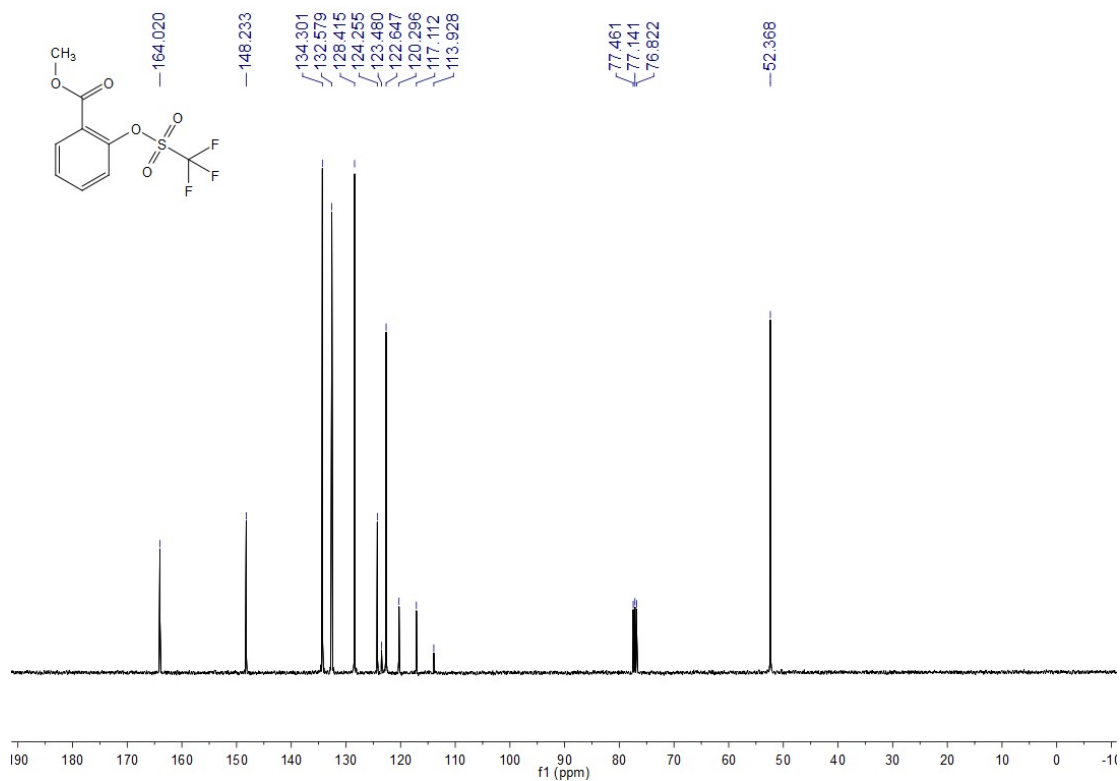

### <sup>1</sup>H NMR Spectrum of **1b**

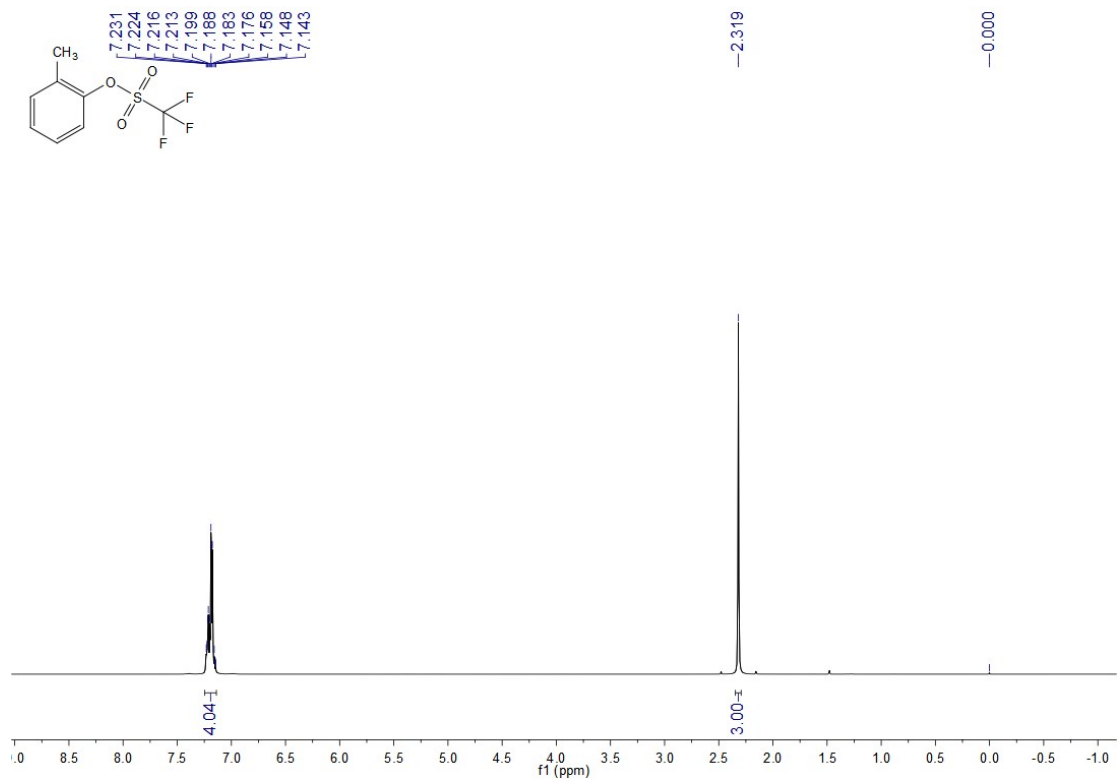

### <sup>13</sup>C NMR Spectrum of **1b**

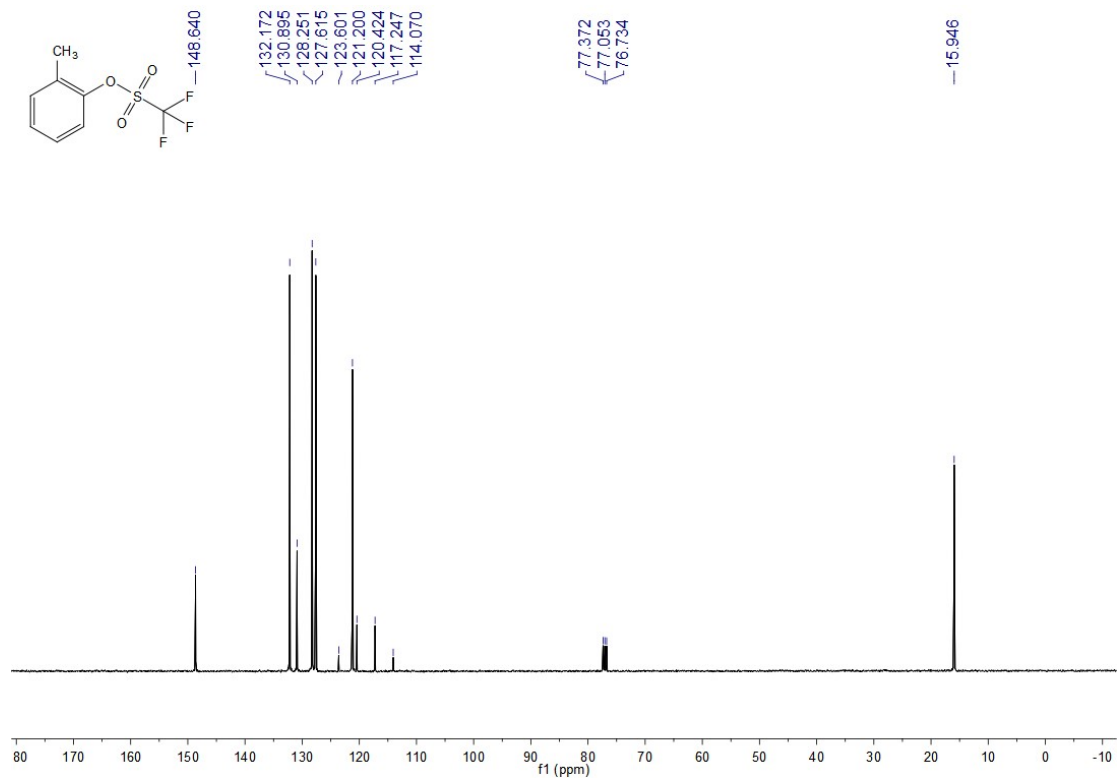



### <sup>1</sup>H NMR Spectrum of **1c**

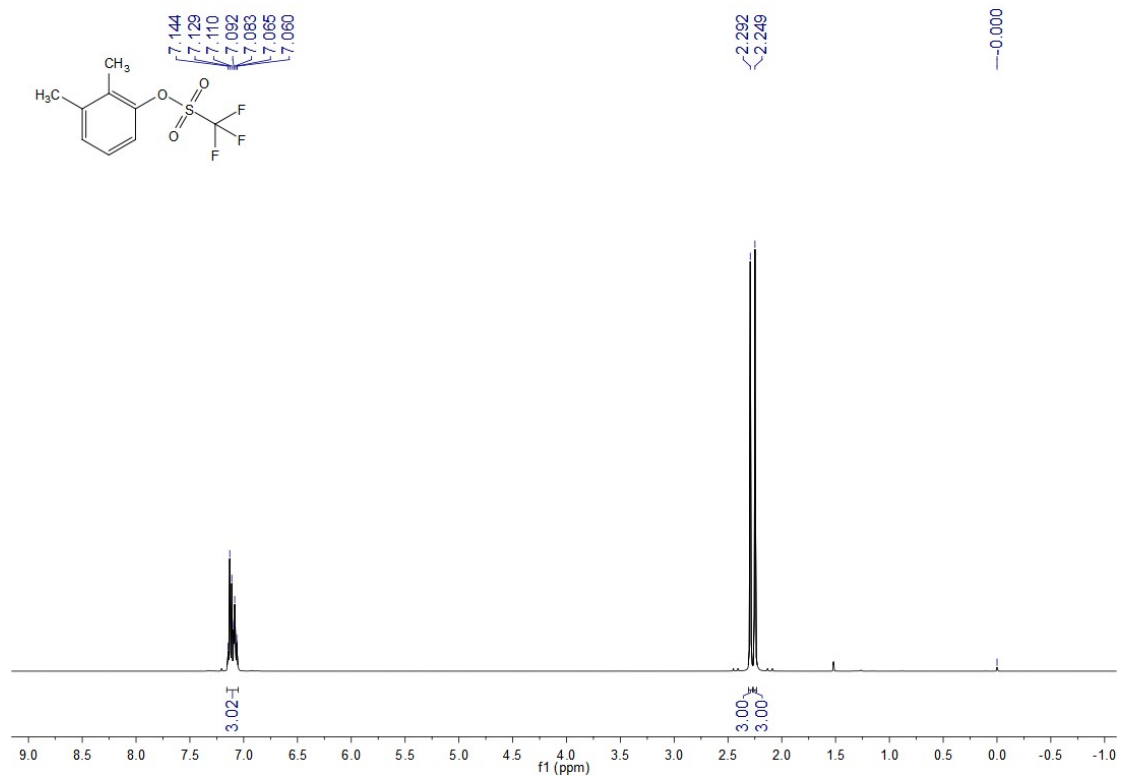

### <sup>13</sup>C NMR Spectrum of **1c**

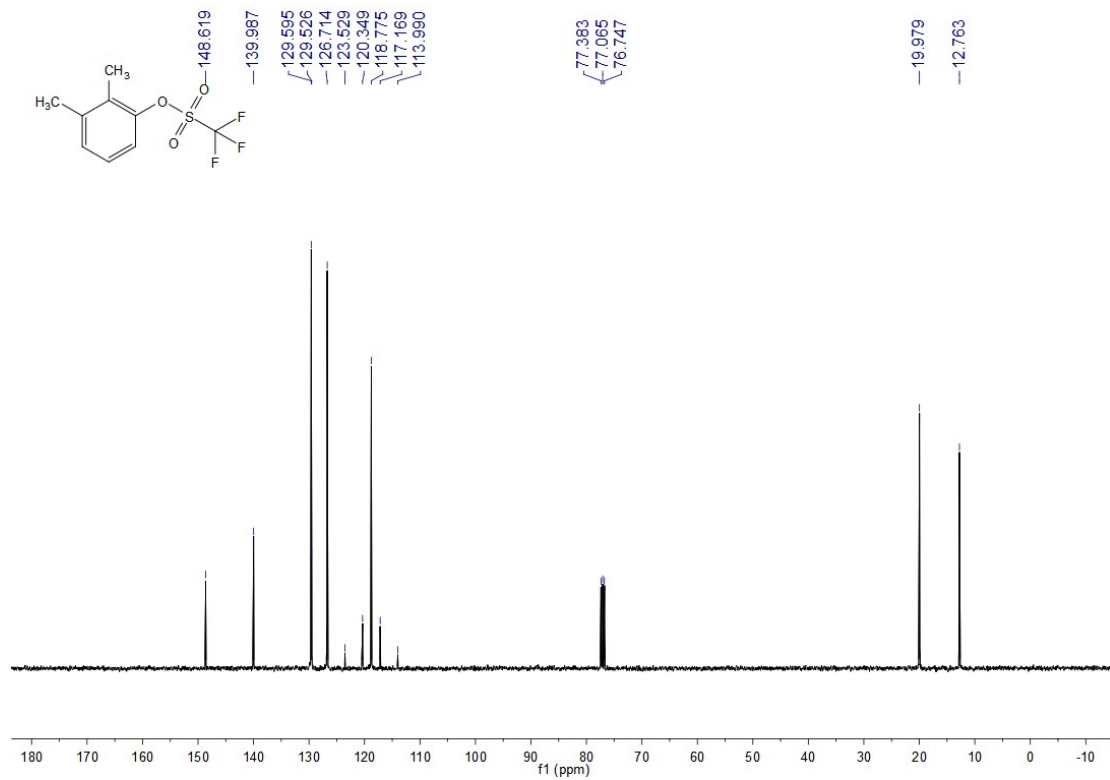

### <sup>1</sup>H NMR Spectrum of **1d**

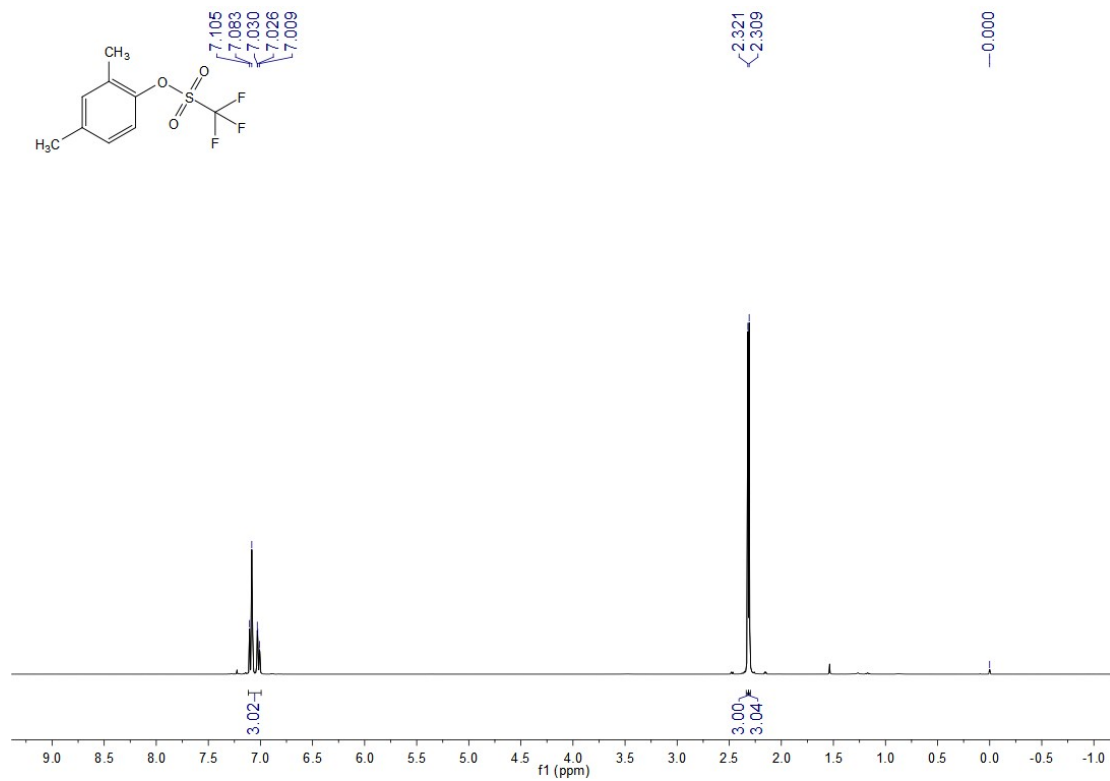

### <sup>13</sup>C NMR Spectrum of **1d**

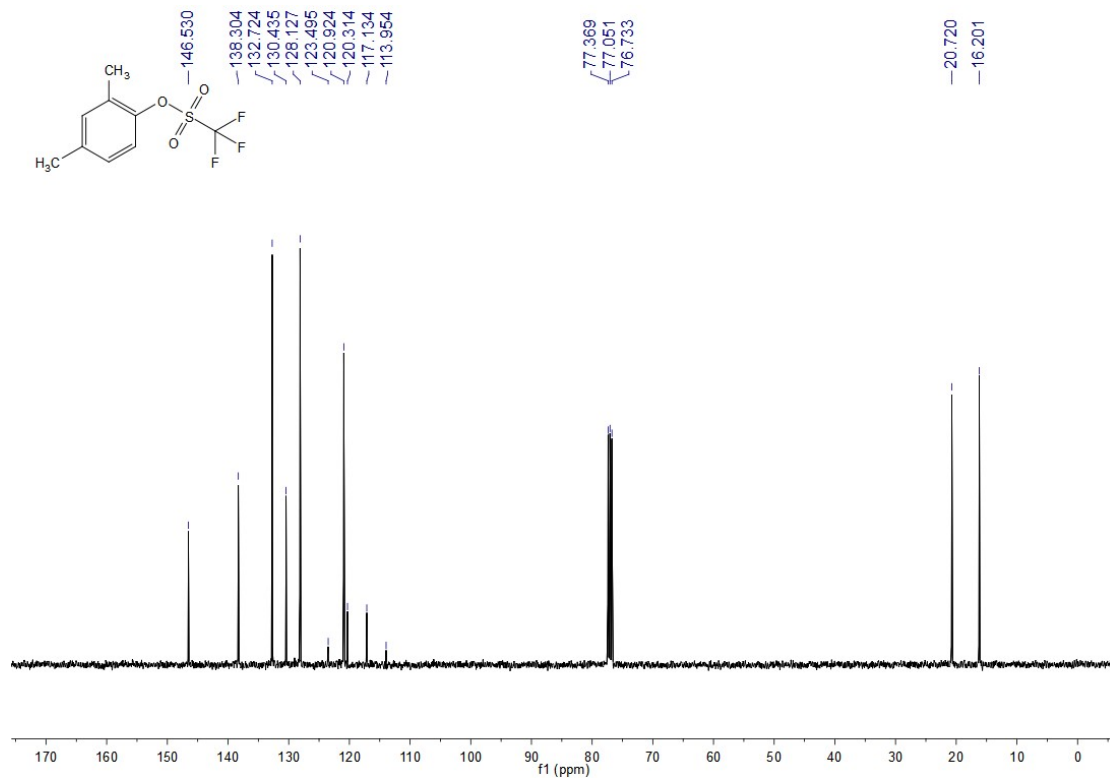

### <sup>1</sup>H NMR Spectrum of **1e**

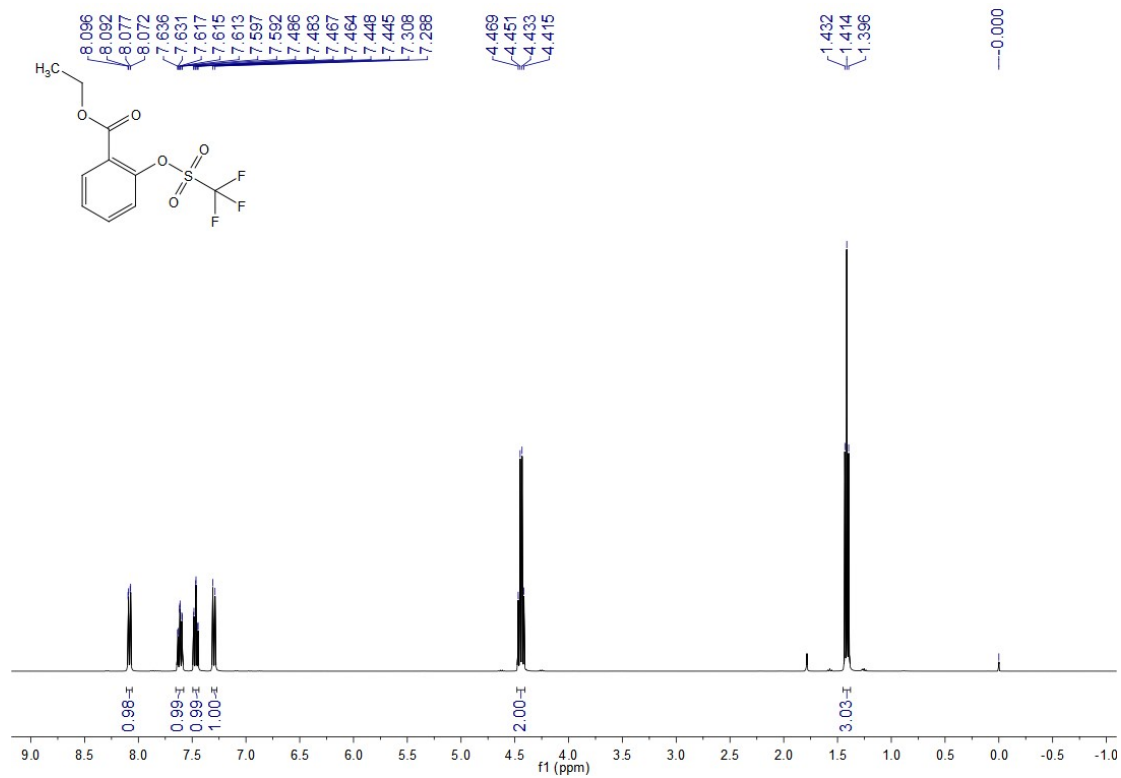

### <sup>13</sup>C NMR Spectrum of **1e**

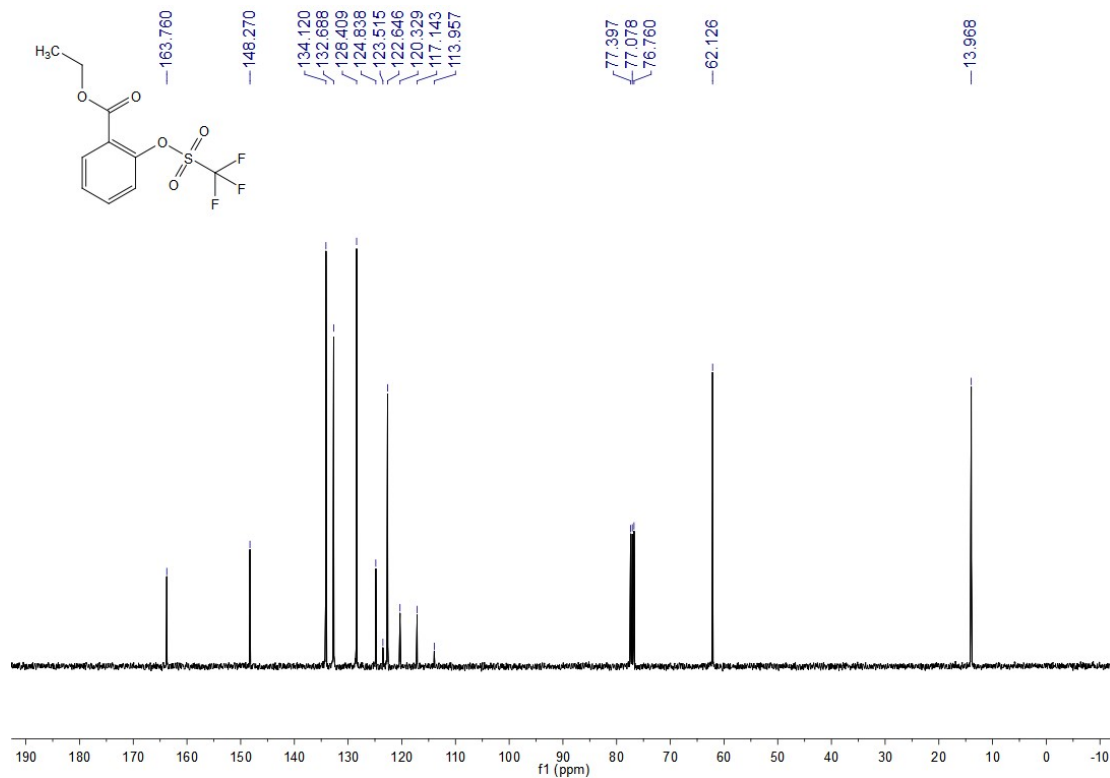

### <sup>1</sup>H NMR Spectrum of **1f**

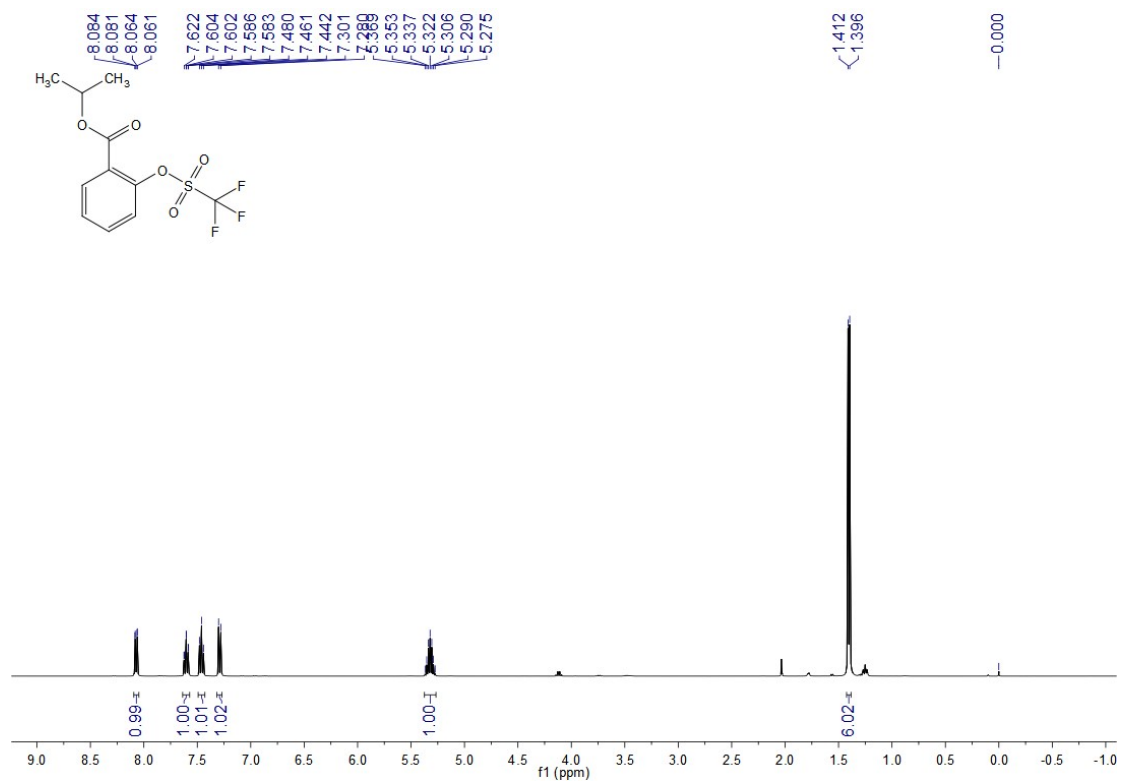

### <sup>13</sup>C NMR Spectrum of **1f**

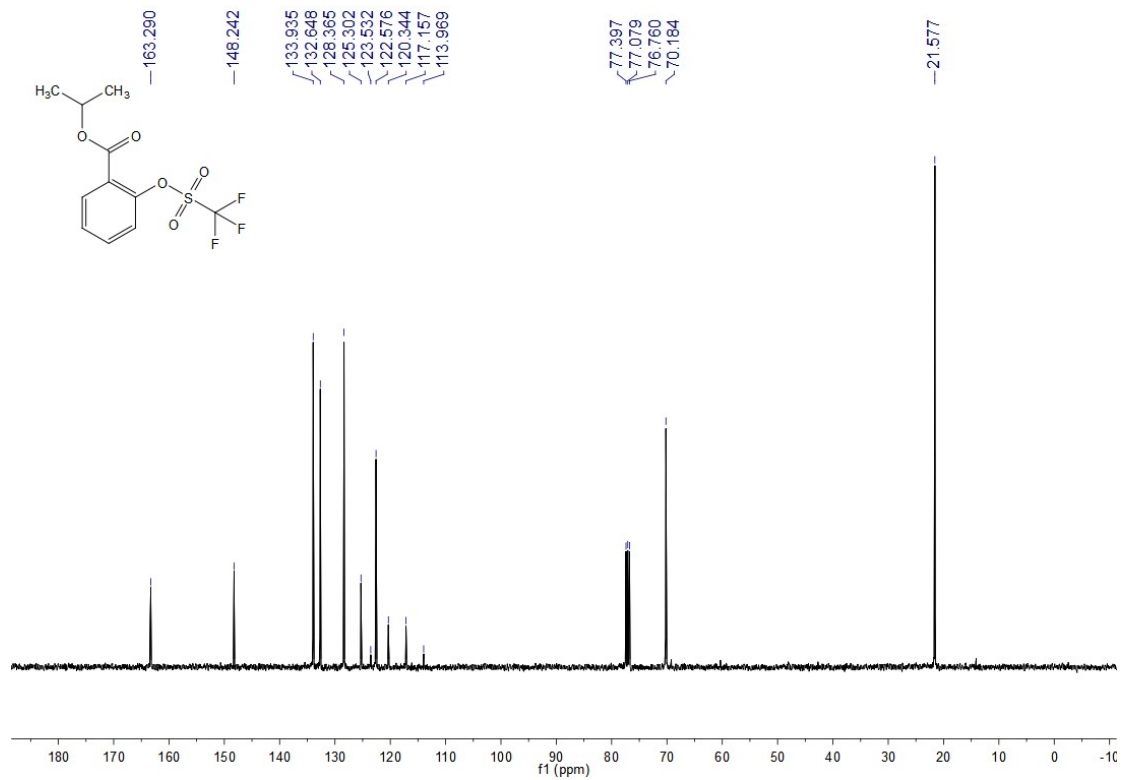

### <sup>1</sup>H NMR Spectrum of **1g**

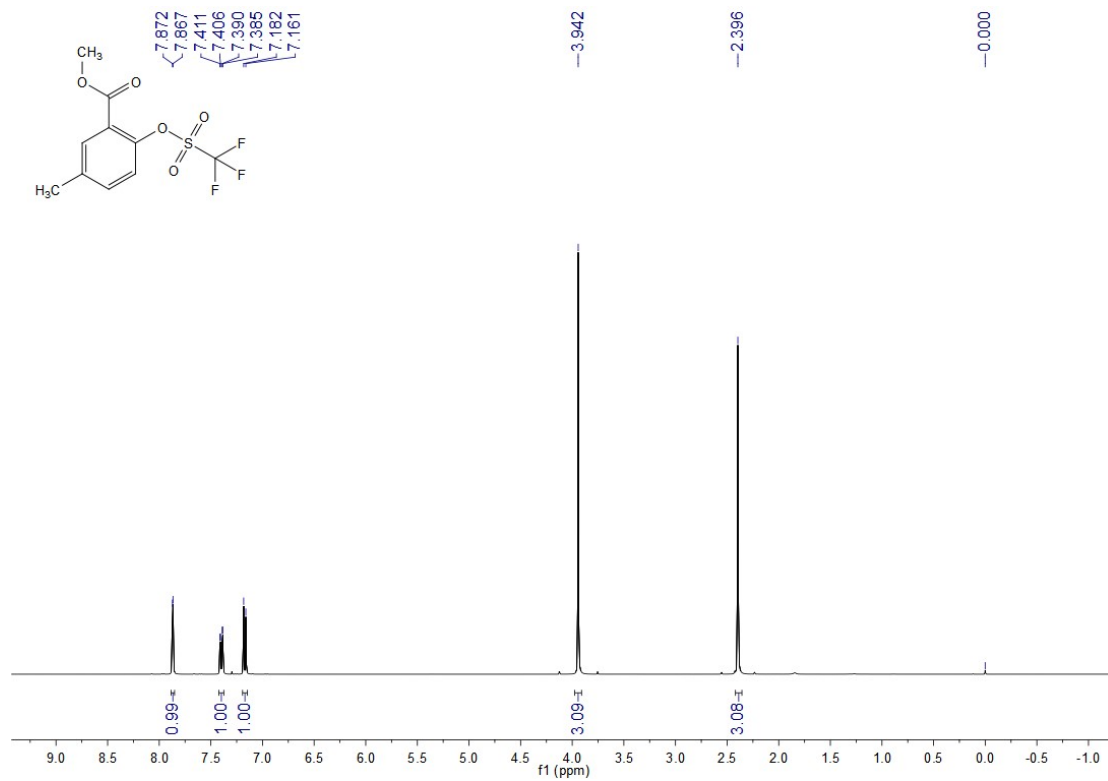

### <sup>13</sup>C NMR Spectrum of **1g**

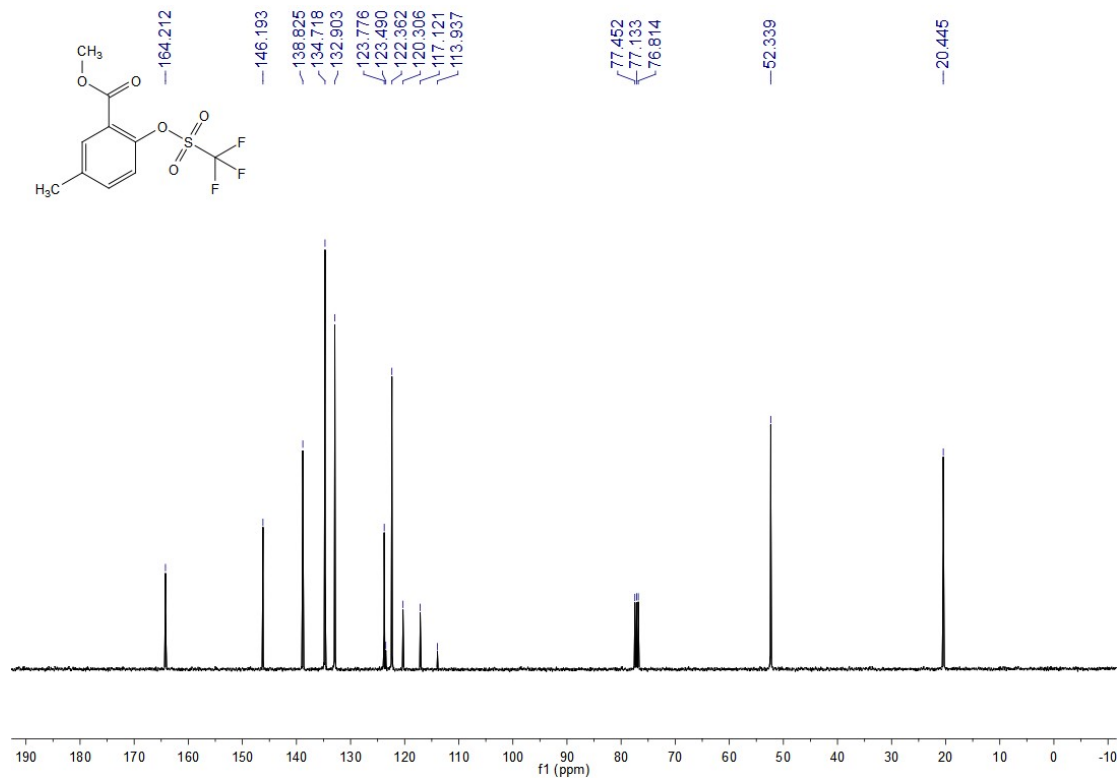

### <sup>1</sup>H NMR Spectrum of **1h**

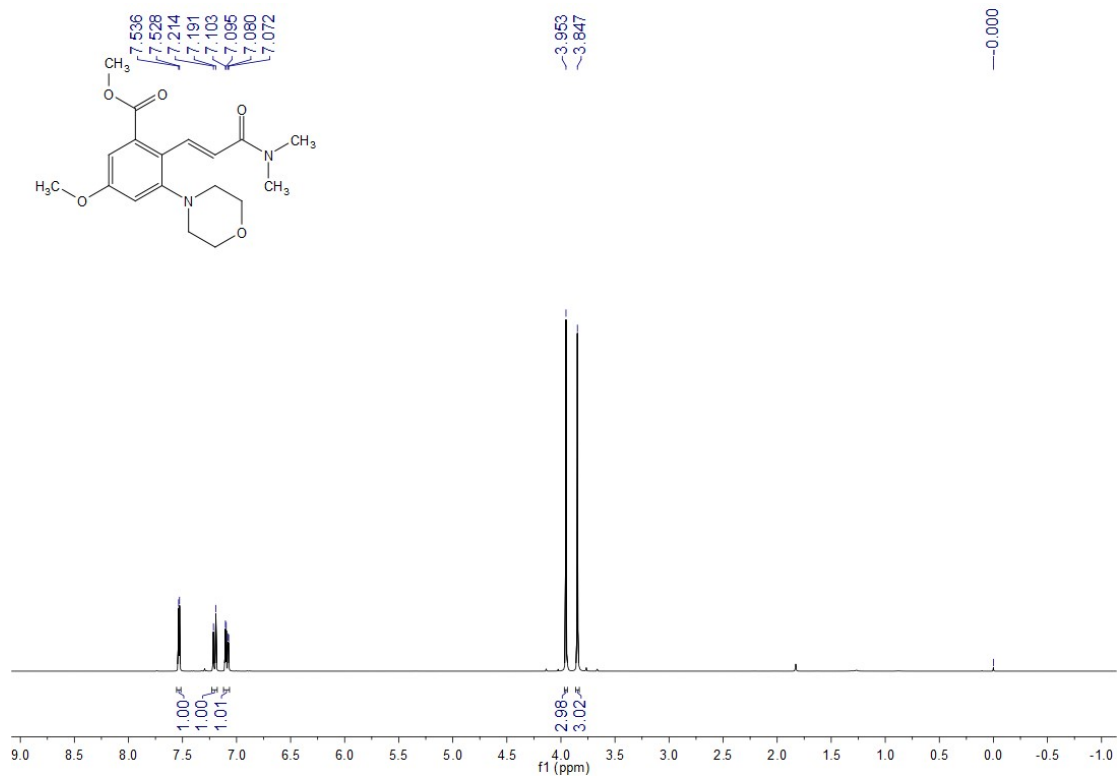

### <sup>13</sup>C NMR Spectrum of **1h**

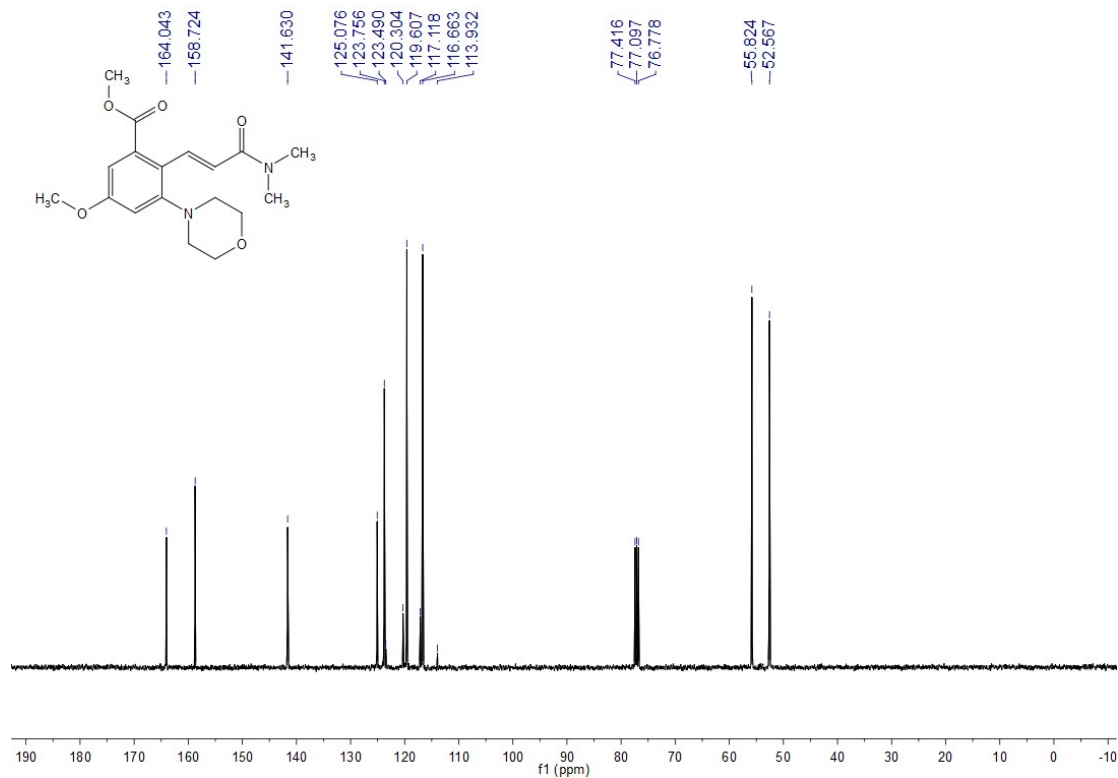

### <sup>1</sup>H NMR Spectrum of **1i**

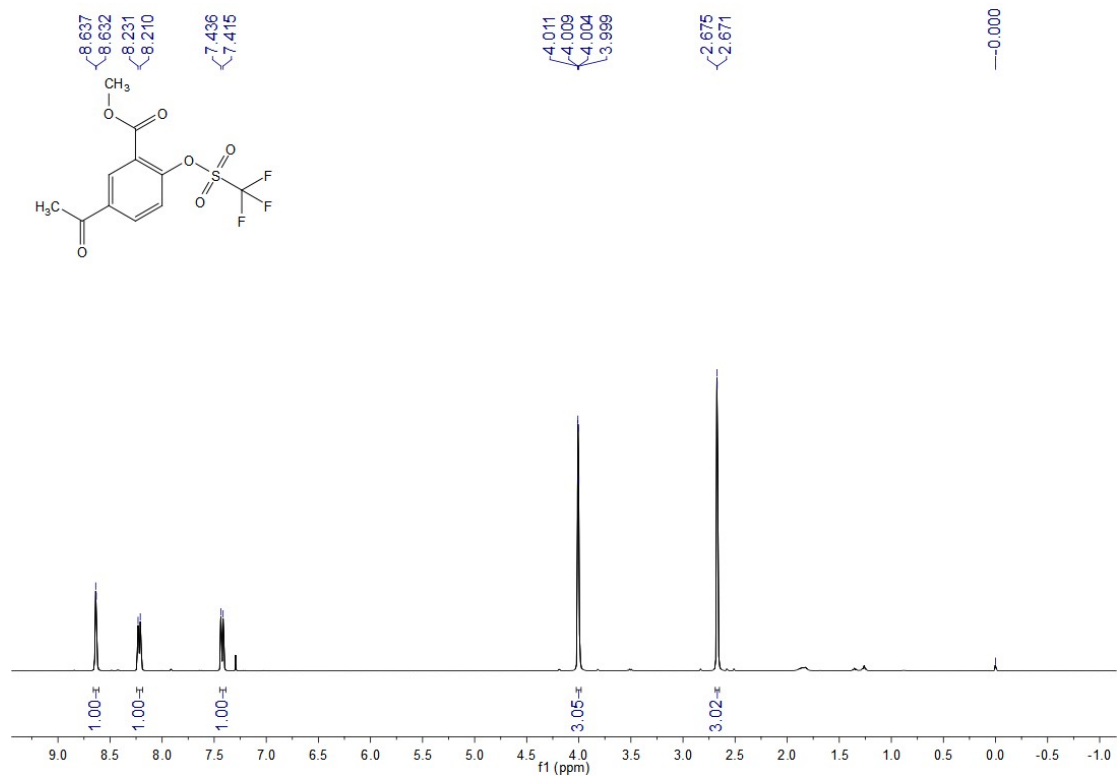

### <sup>13</sup>C NMR Spectrum of **1i**

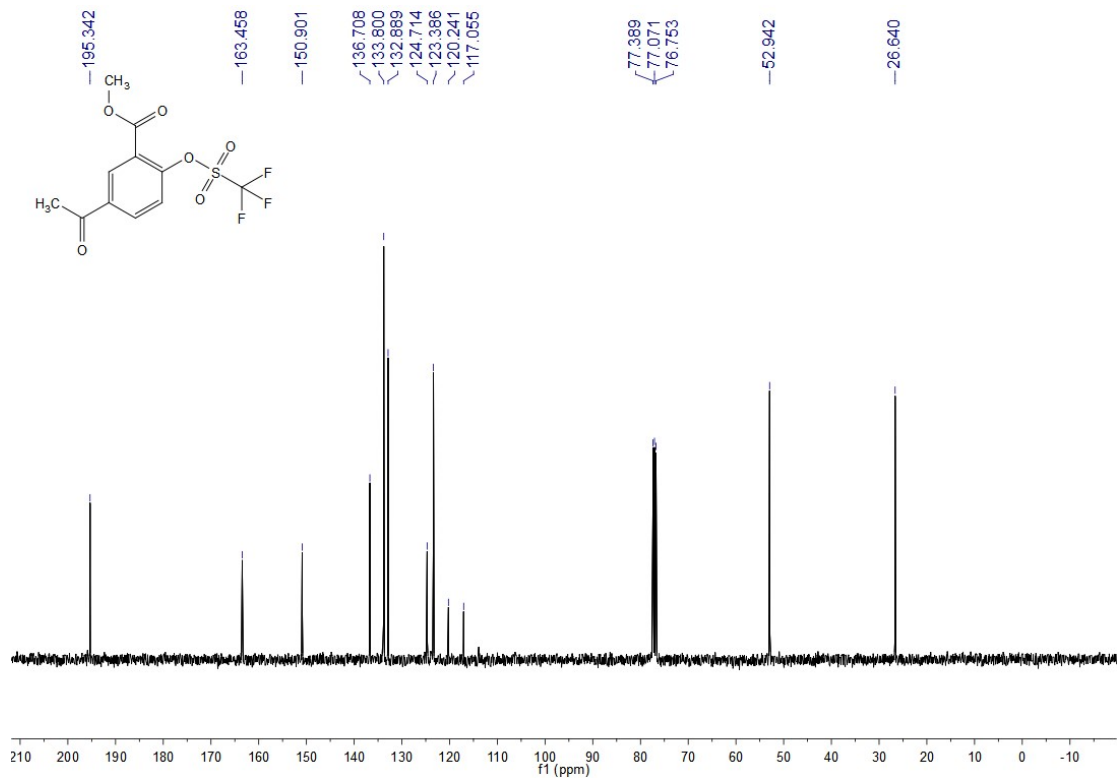

### <sup>1</sup>H NMR Spectrum of 1j

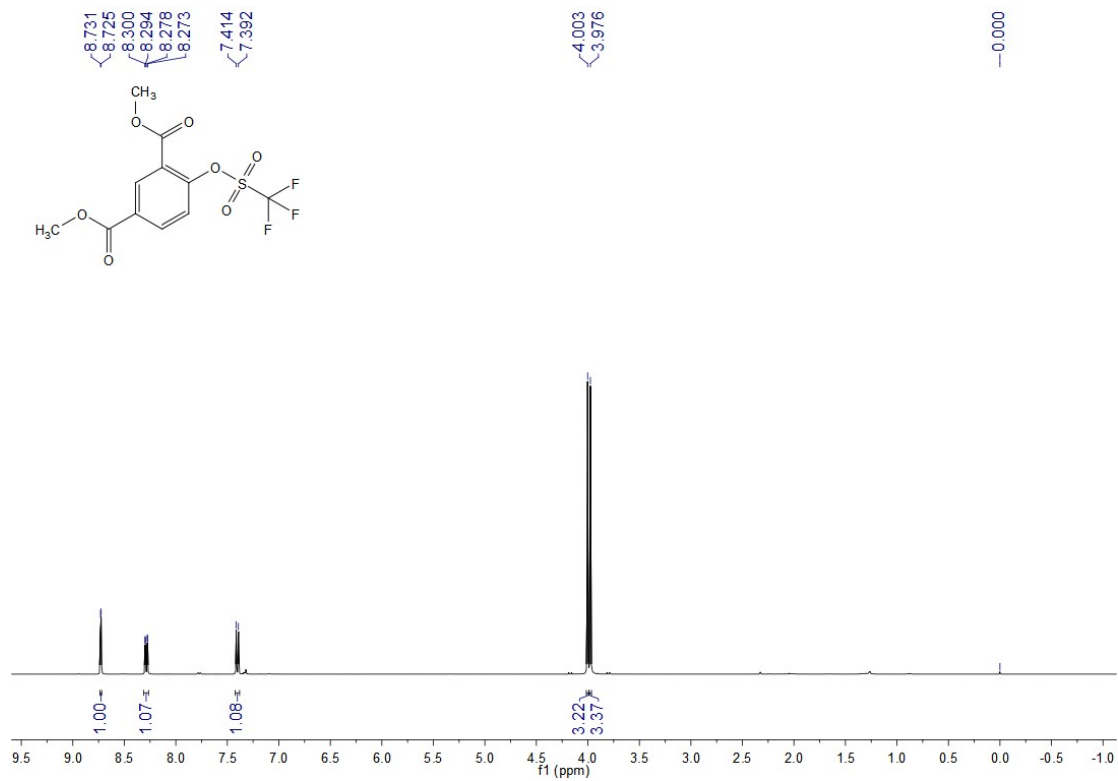

### <sup>13</sup>C NMR Spectrum of 1j

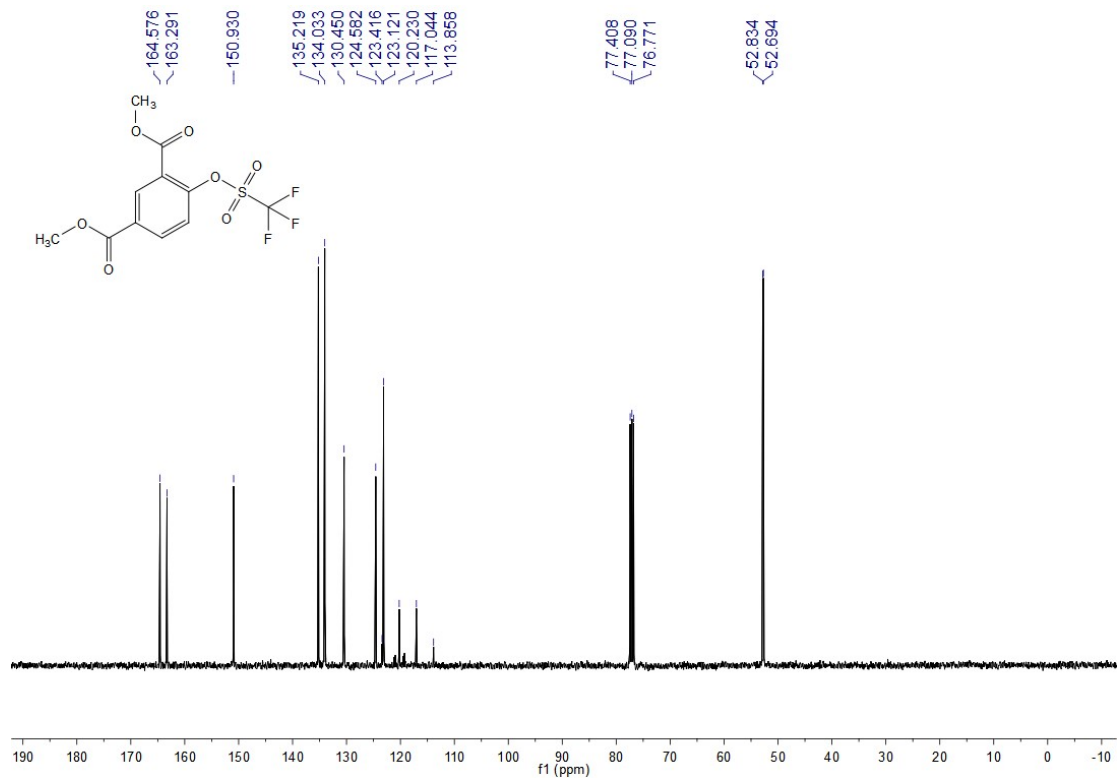



### <sup>1</sup>H NMR Spectrum of 1k

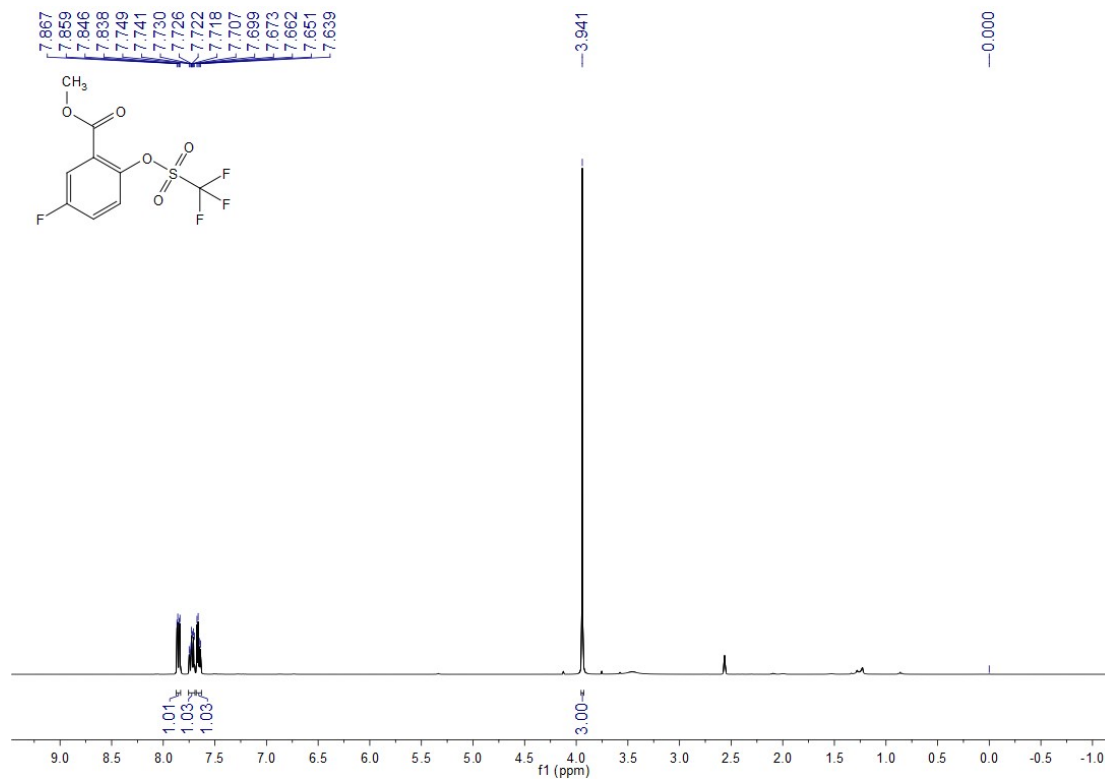

### <sup>13</sup>C NMR Spectrum of 1k

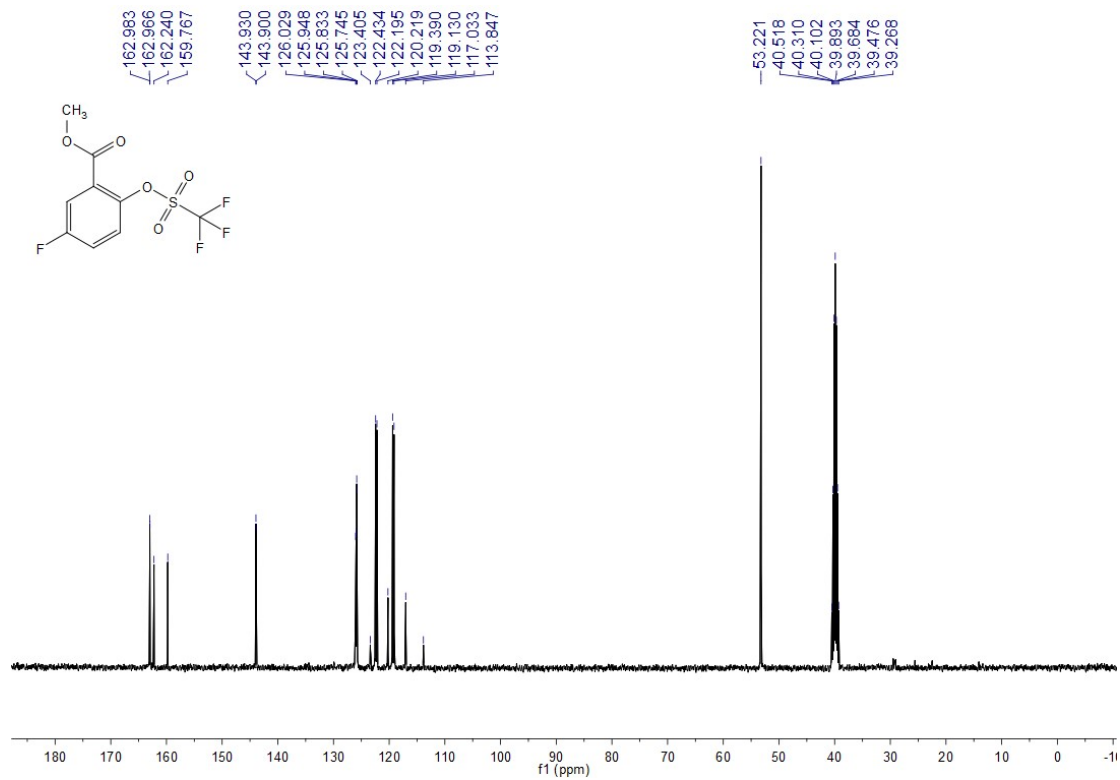

### <sup>1</sup>H NMR Spectrum of **11**

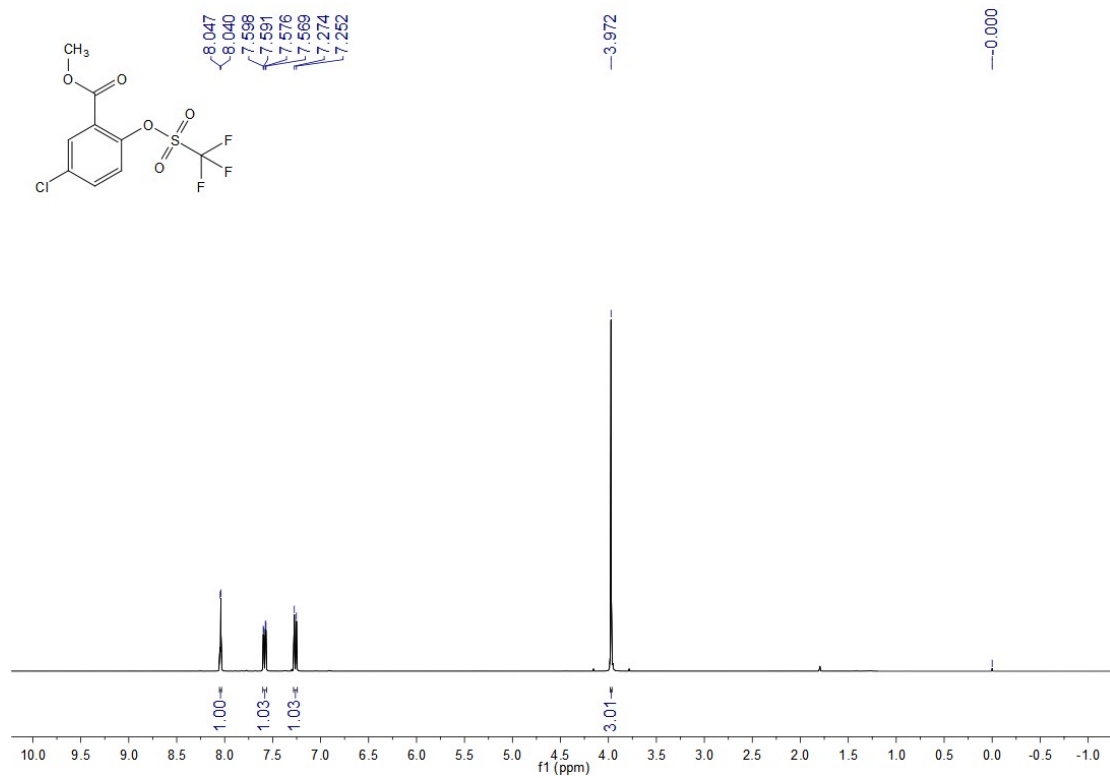

### <sup>13</sup>C NMR Spectrum of **11**

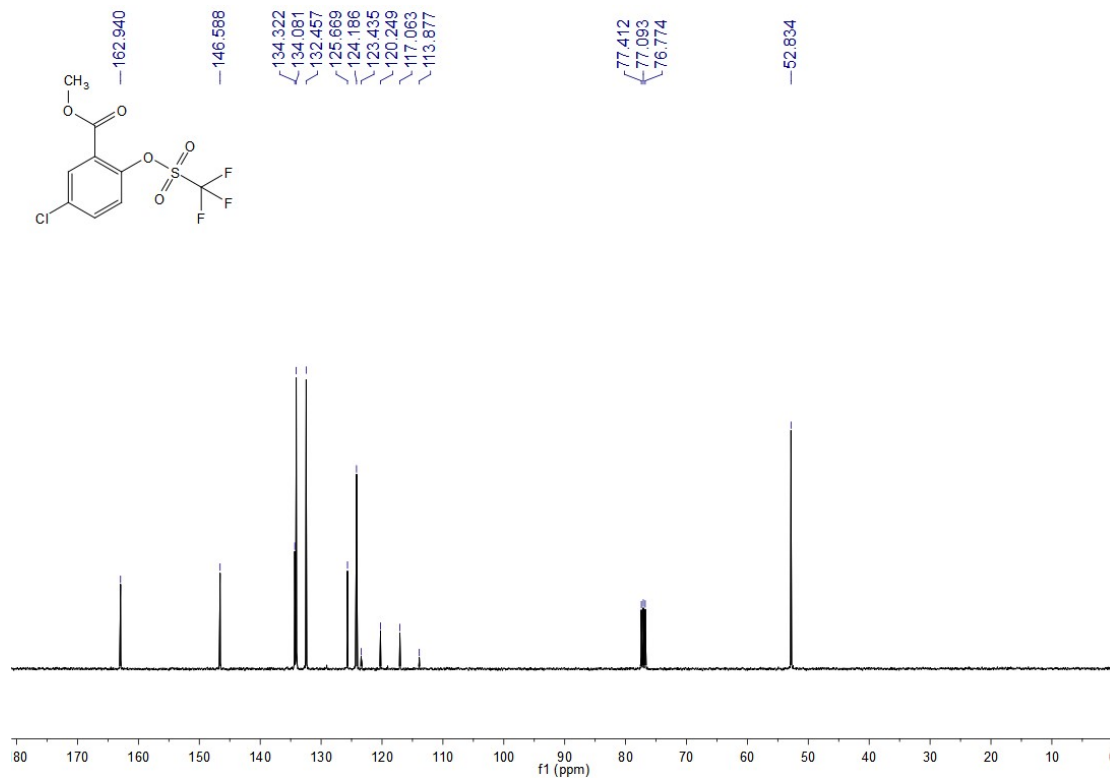

### <sup>1</sup>H NMR Spectrum of **1m**

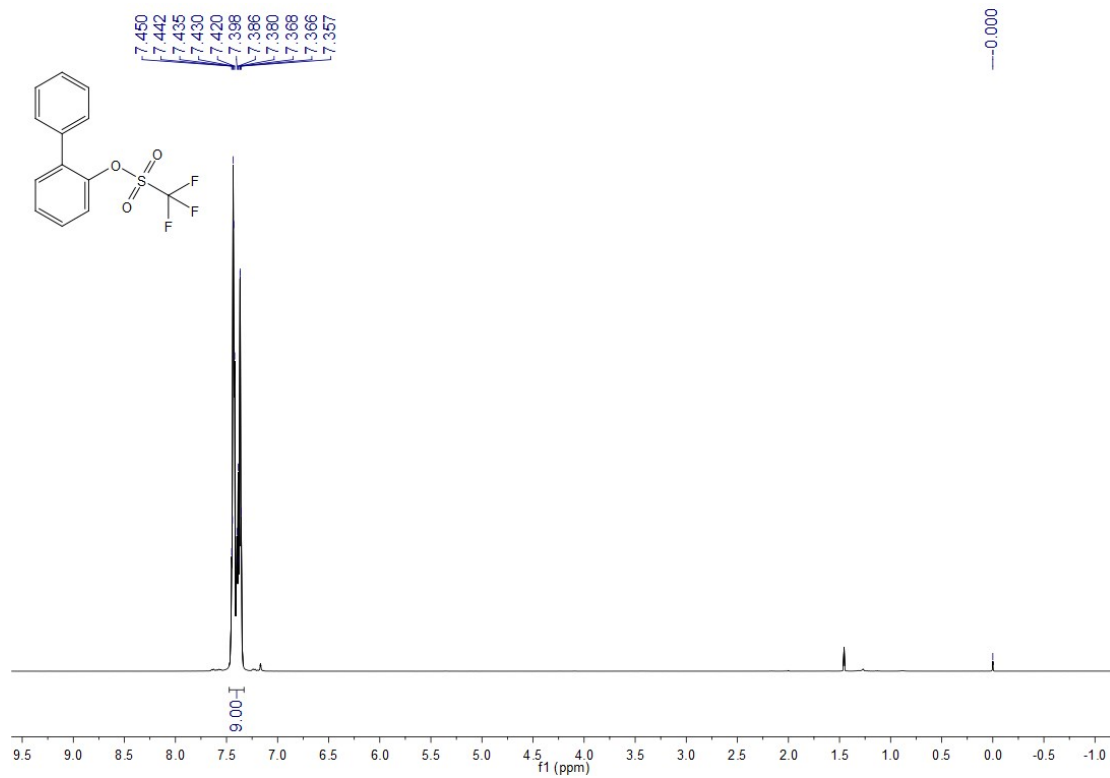

### <sup>13</sup>C NMR Spectrum of **1m**

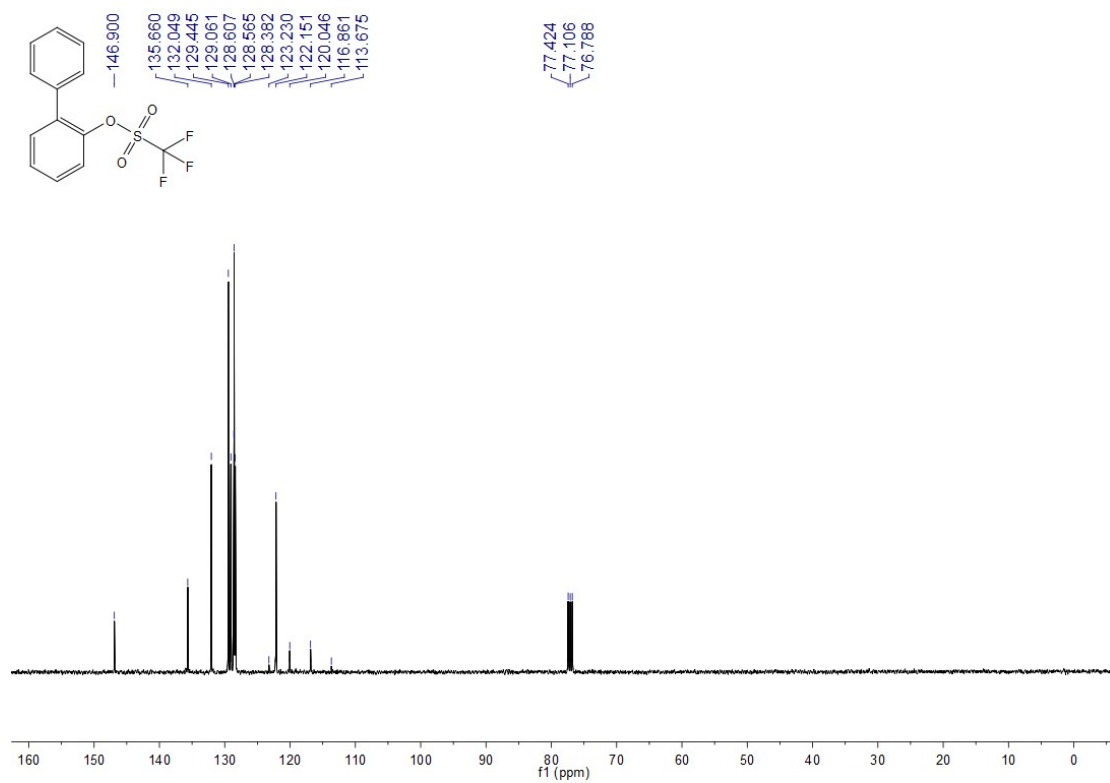

### <sup>1</sup>H NMR Spectrum of **1n**

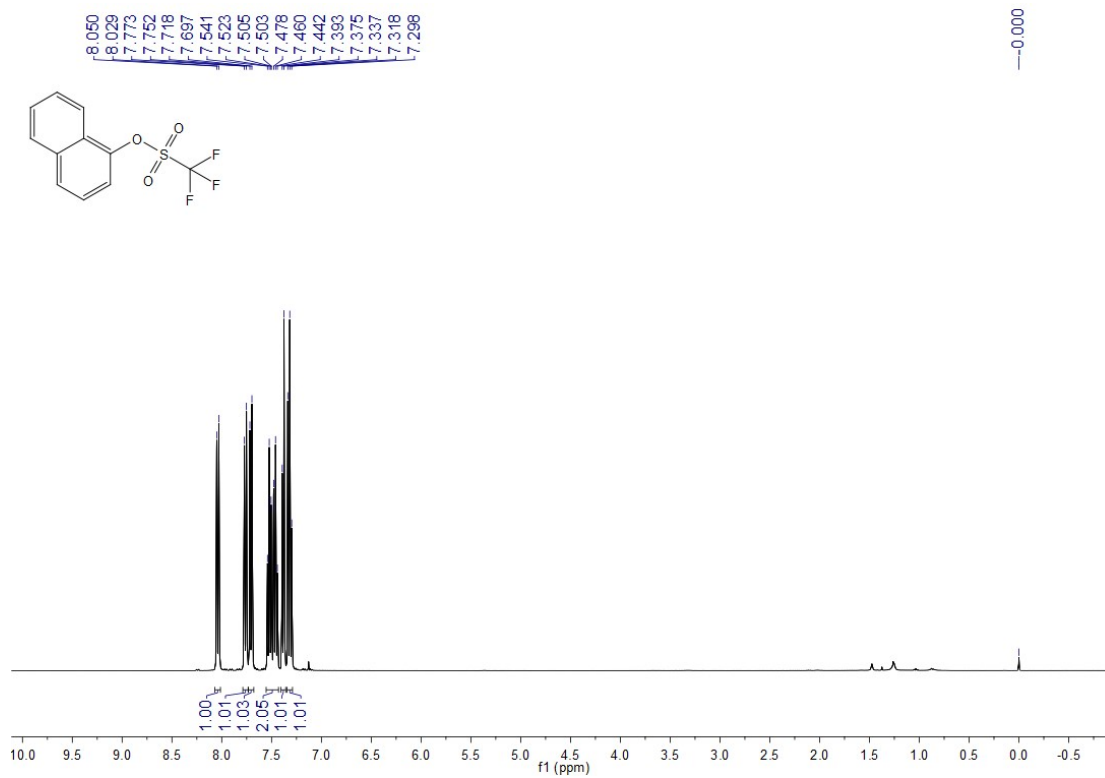

### <sup>13</sup>C NMR Spectrum of **1n**

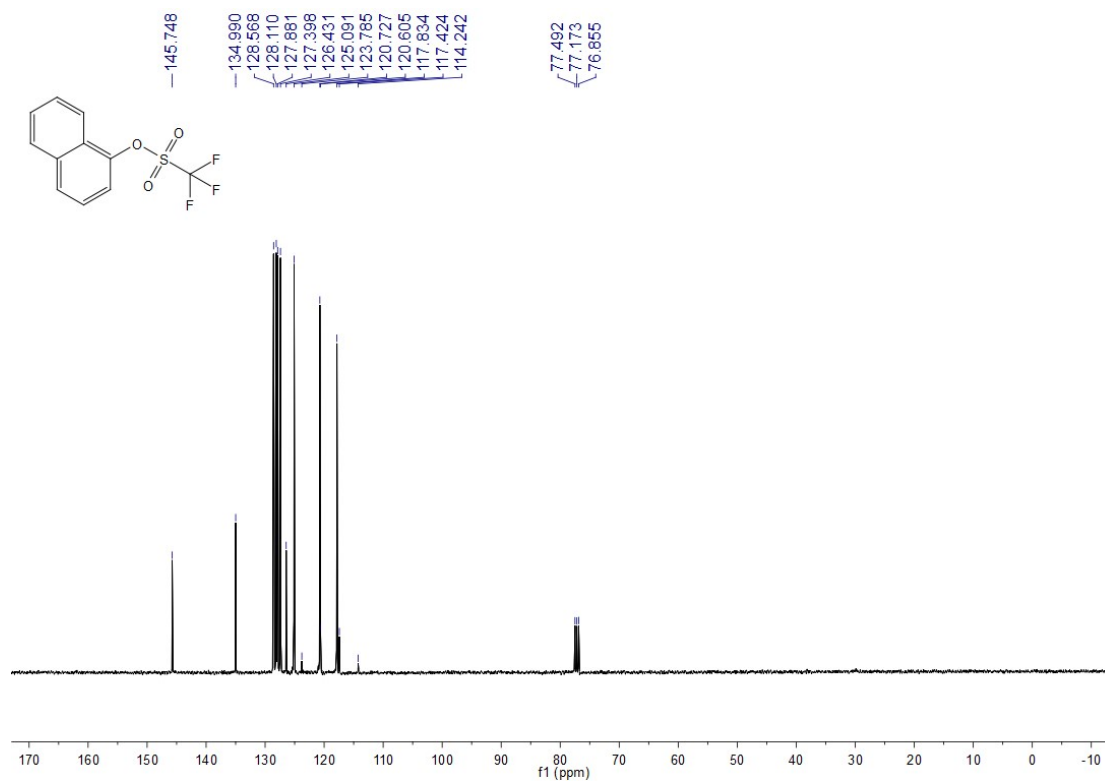

### <sup>1</sup>H NMR Spectrum of **1o**

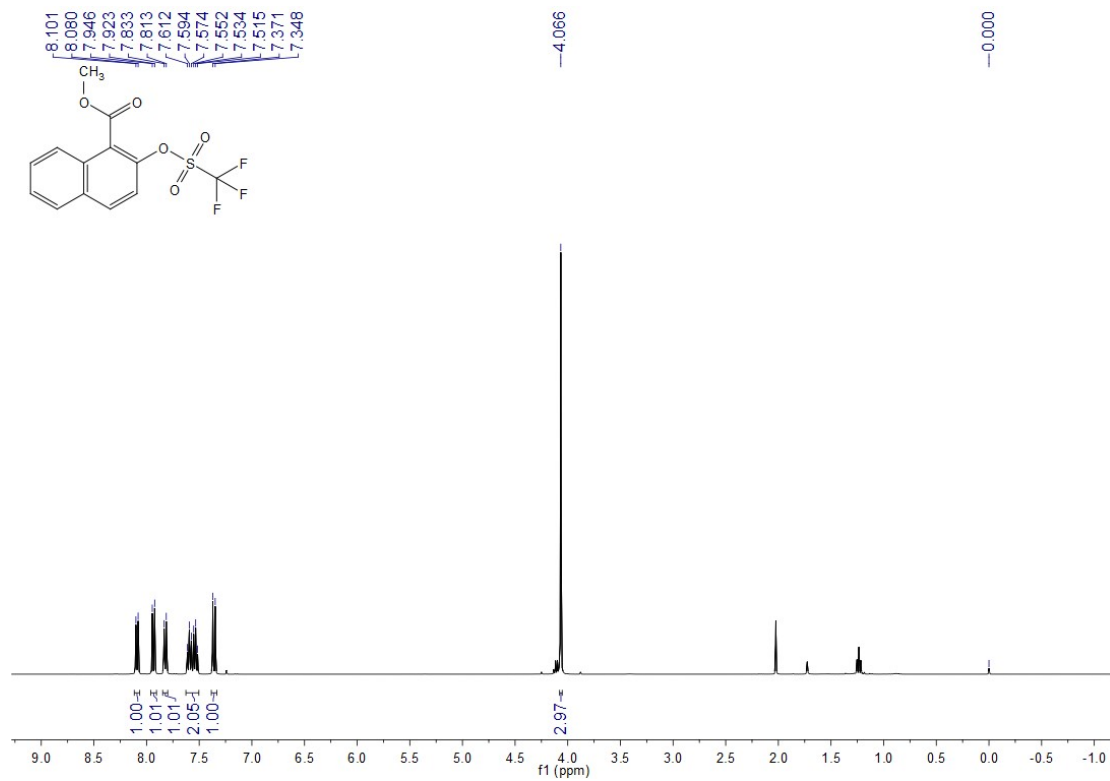

### <sup>13</sup>C NMR Spectrum of **1o**

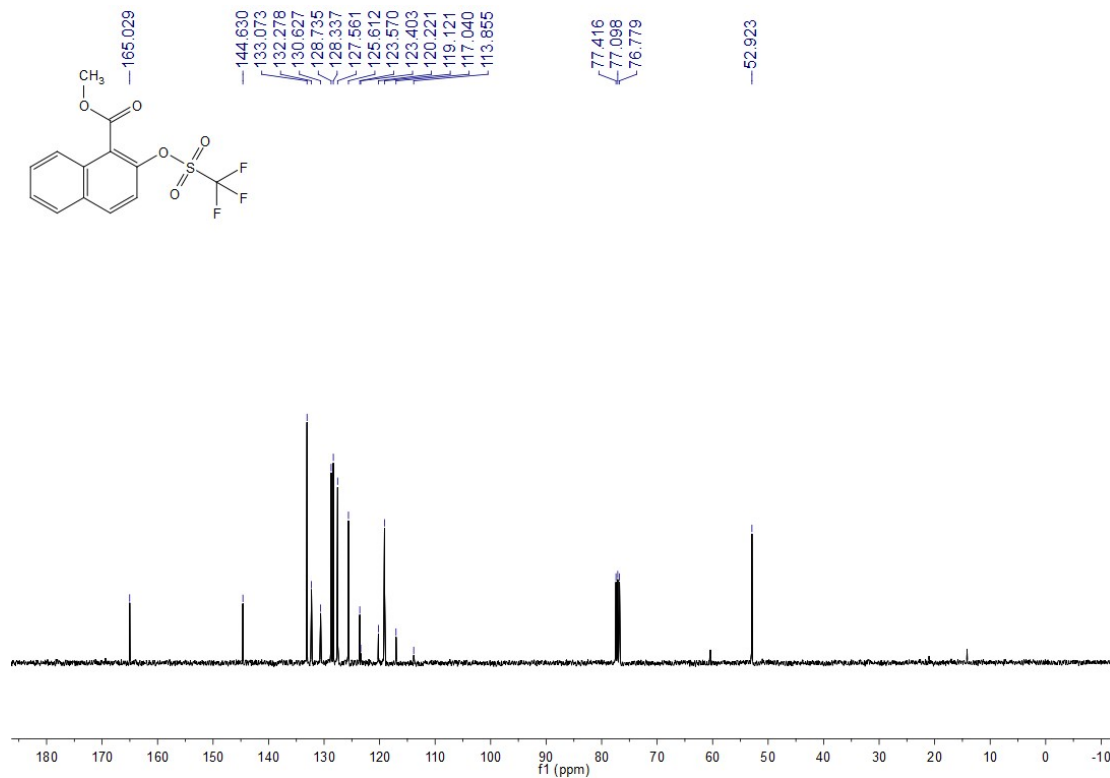

### <sup>1</sup>H NMR Spectrum of 2a

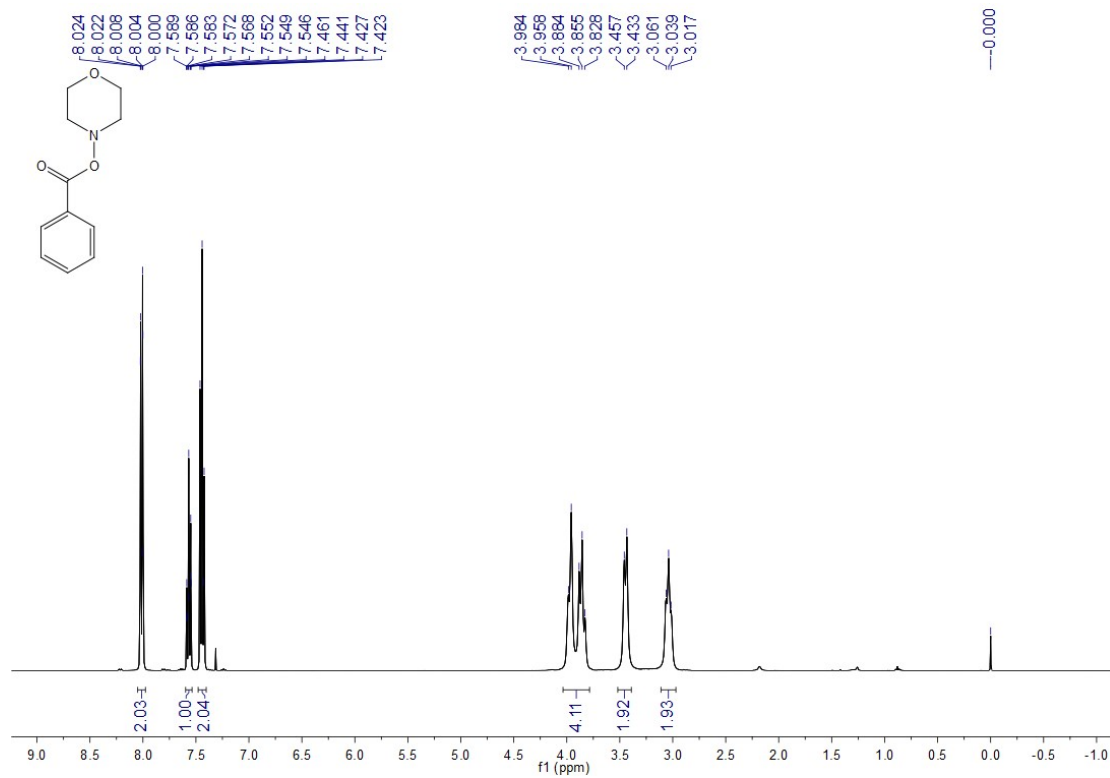

### <sup>13</sup>C NMR Spectrum of 2a

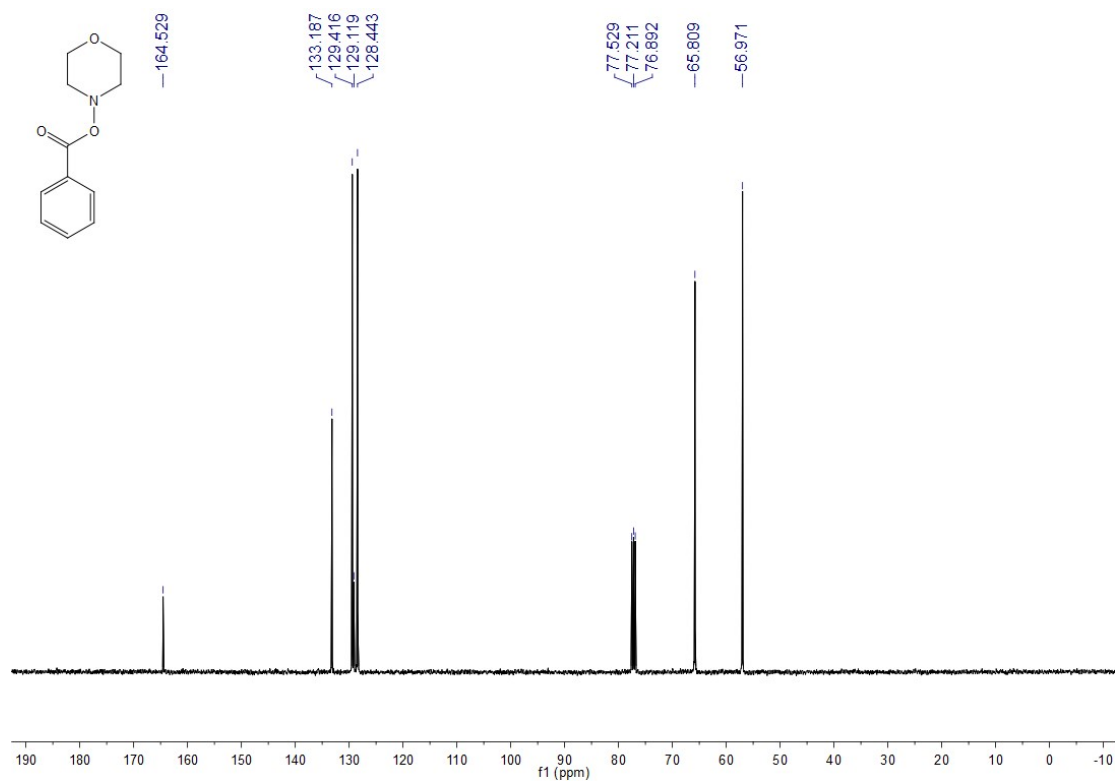

### <sup>1</sup>H NMR Spectrum of 2b

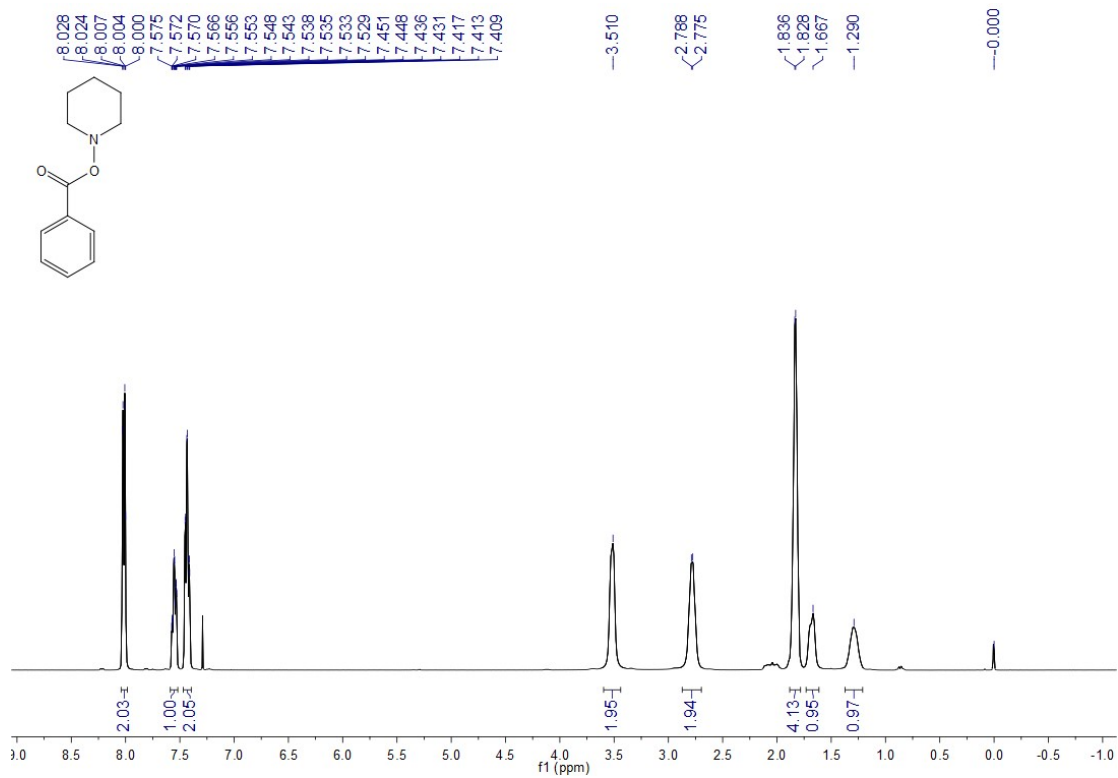

### <sup>13</sup>C NMR Spectrum of 2b

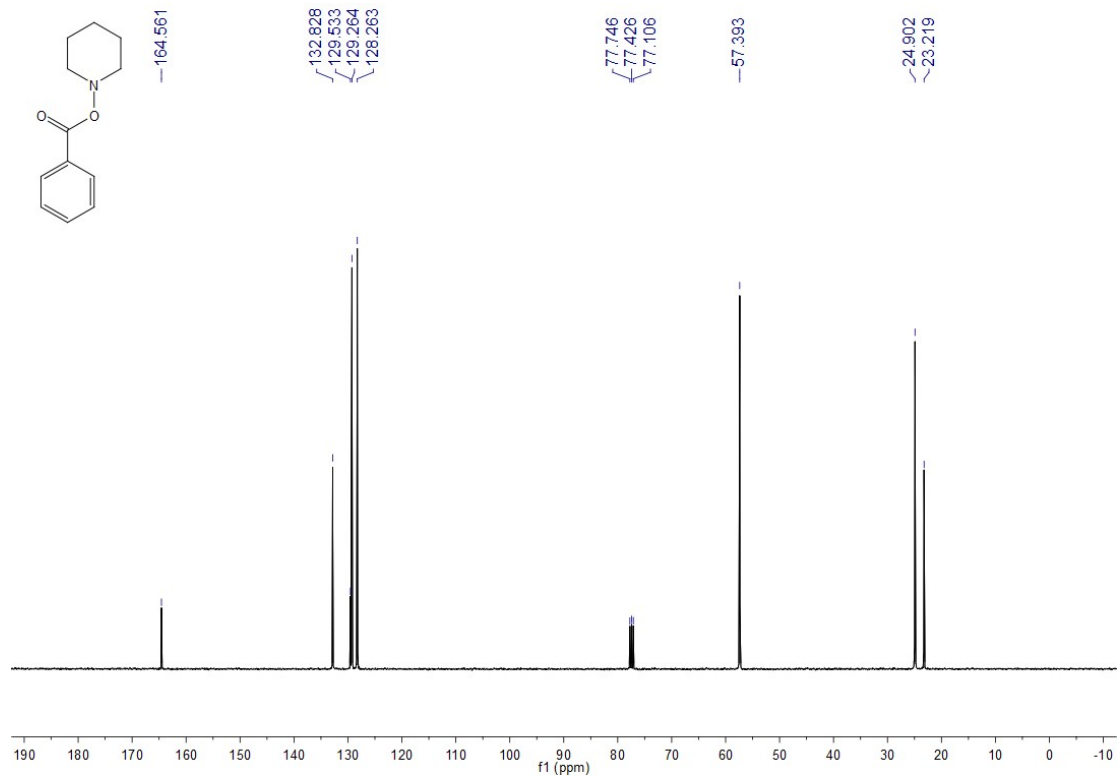

### <sup>1</sup>H NMR Spectrum of 2c

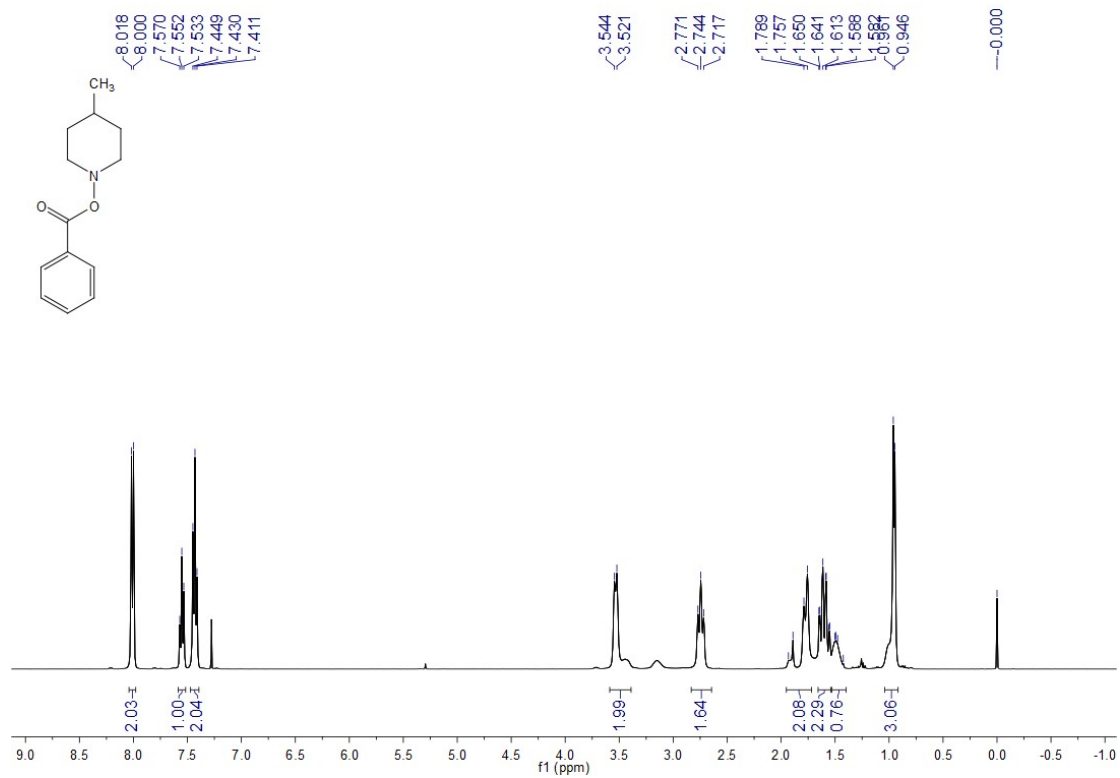

### <sup>13</sup>C NMR Spectrum of 2c

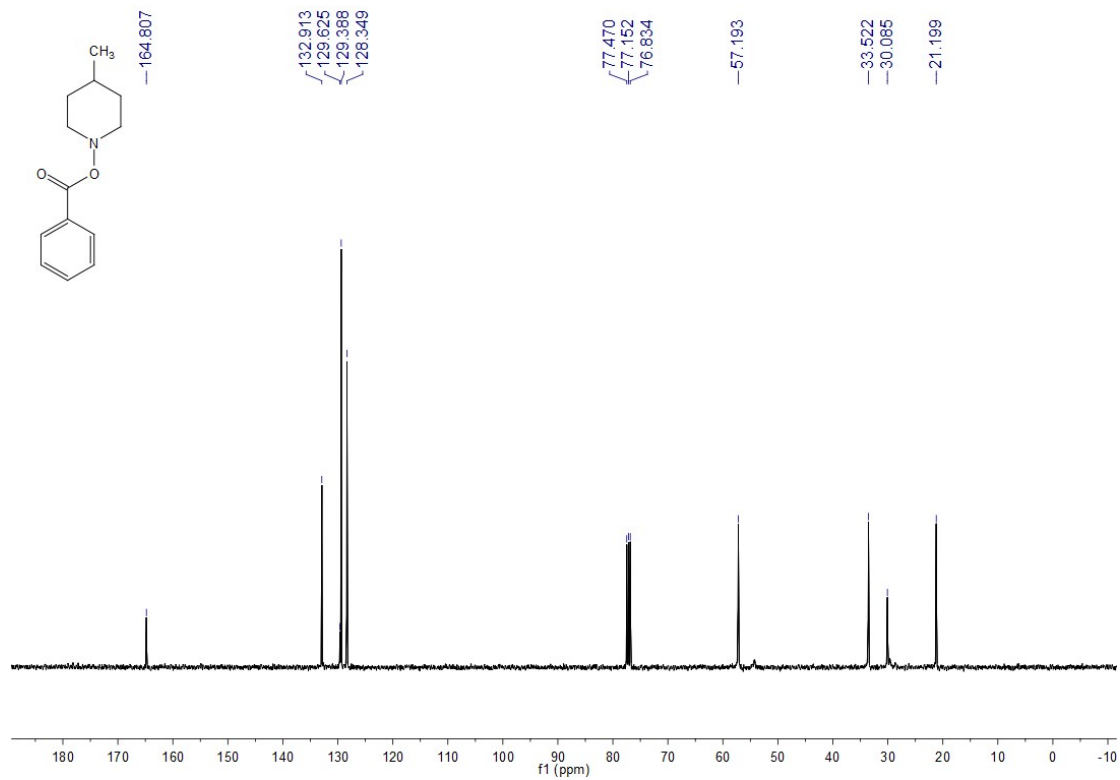



### <sup>1</sup>H NMR Spectrum of 2d

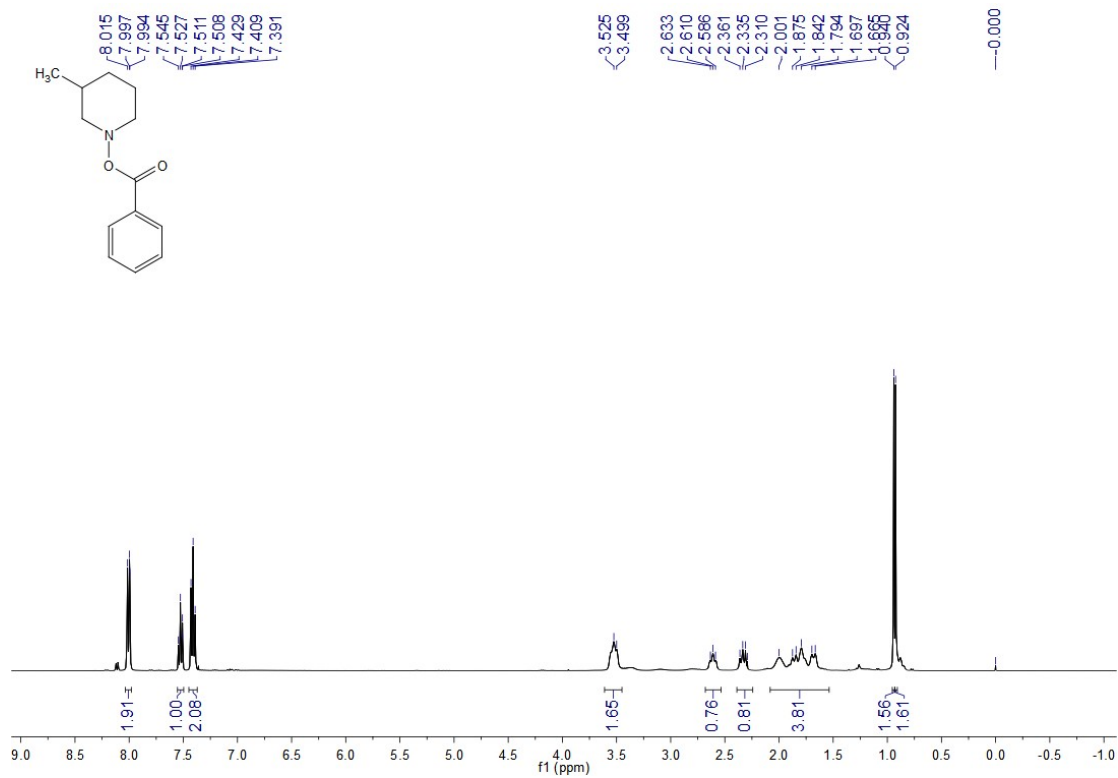

### <sup>13</sup>C NMR Spectrum of 2d

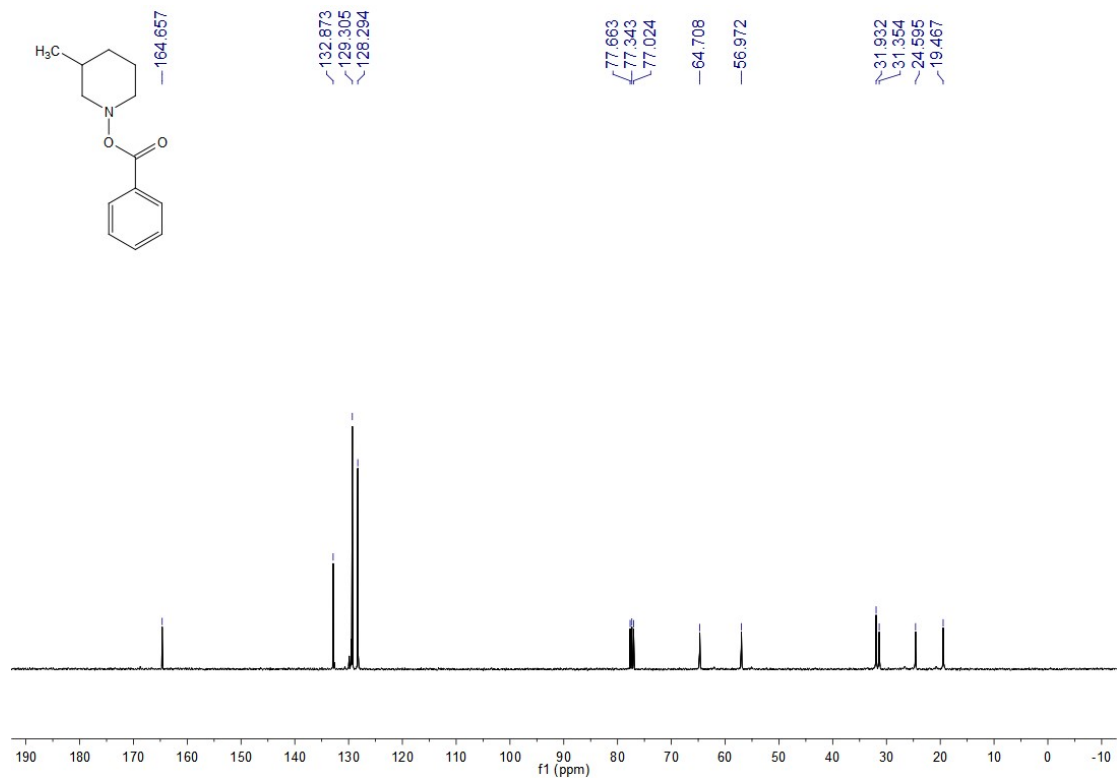

### <sup>1</sup>H NMR Spectrum of 2e

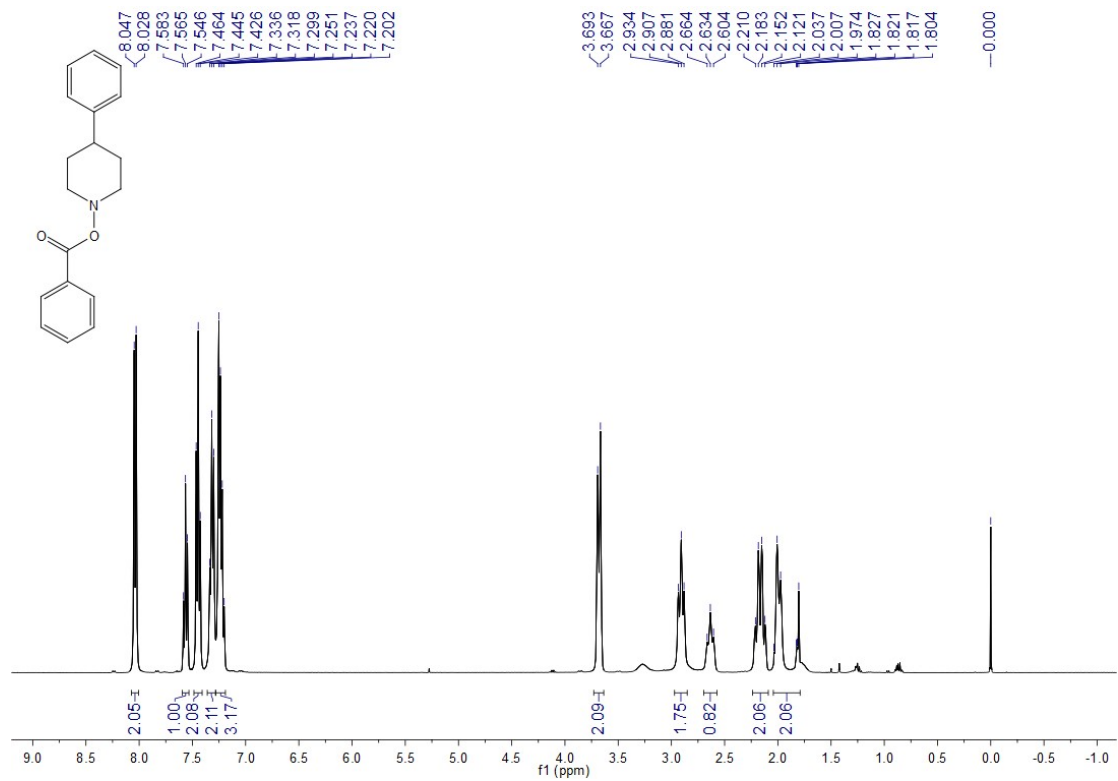

### <sup>13</sup>C NMR Spectrum of 2e

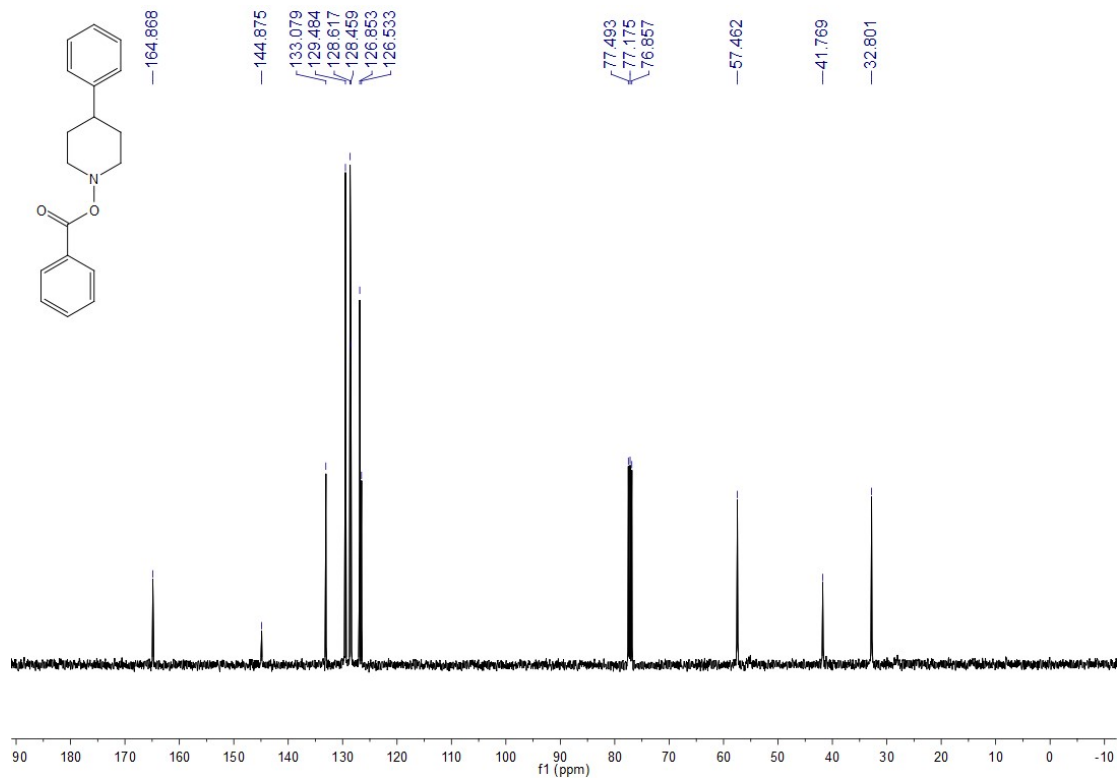

### <sup>1</sup>H NMR Spectrum of 2f

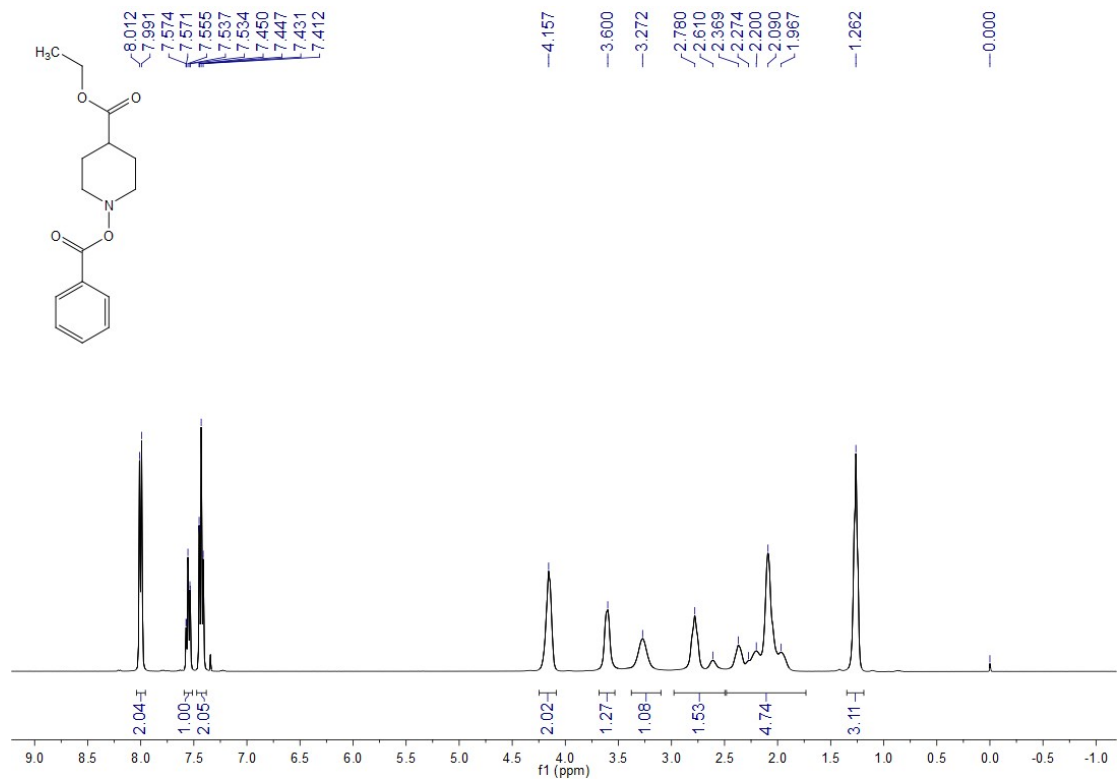

### <sup>13</sup>C NMR Spectrum of 2f

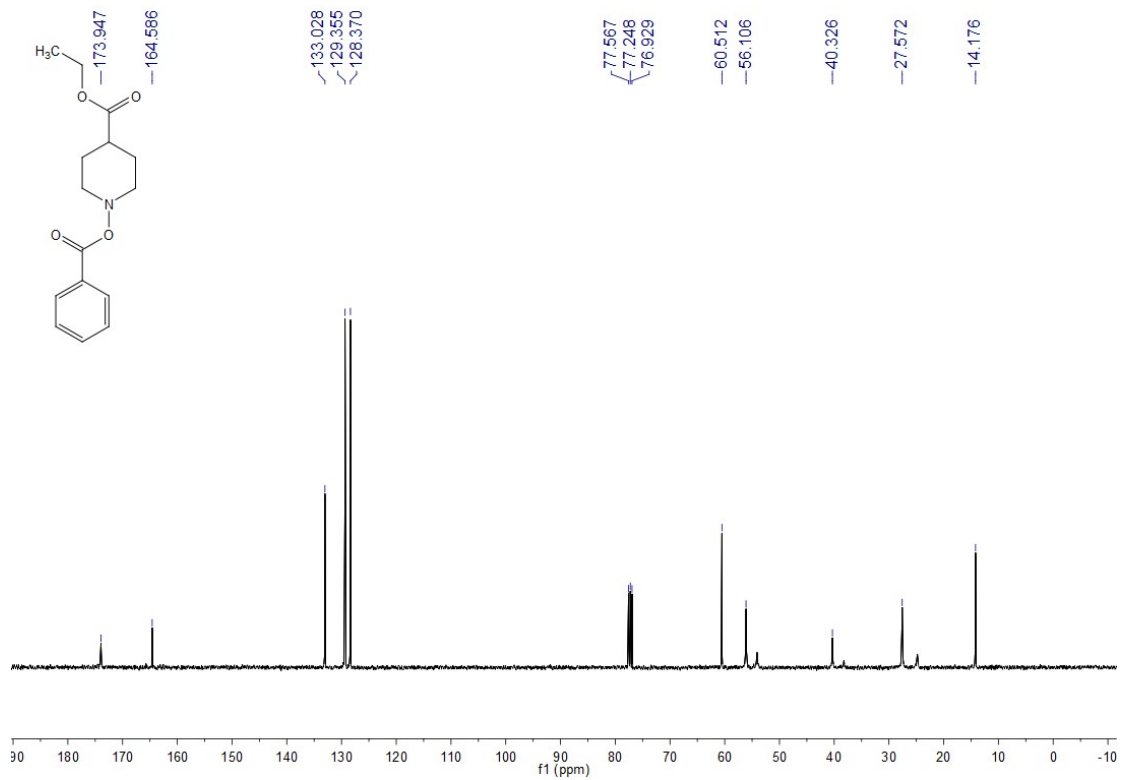

### <sup>1</sup>H NMR Spectrum of 2g

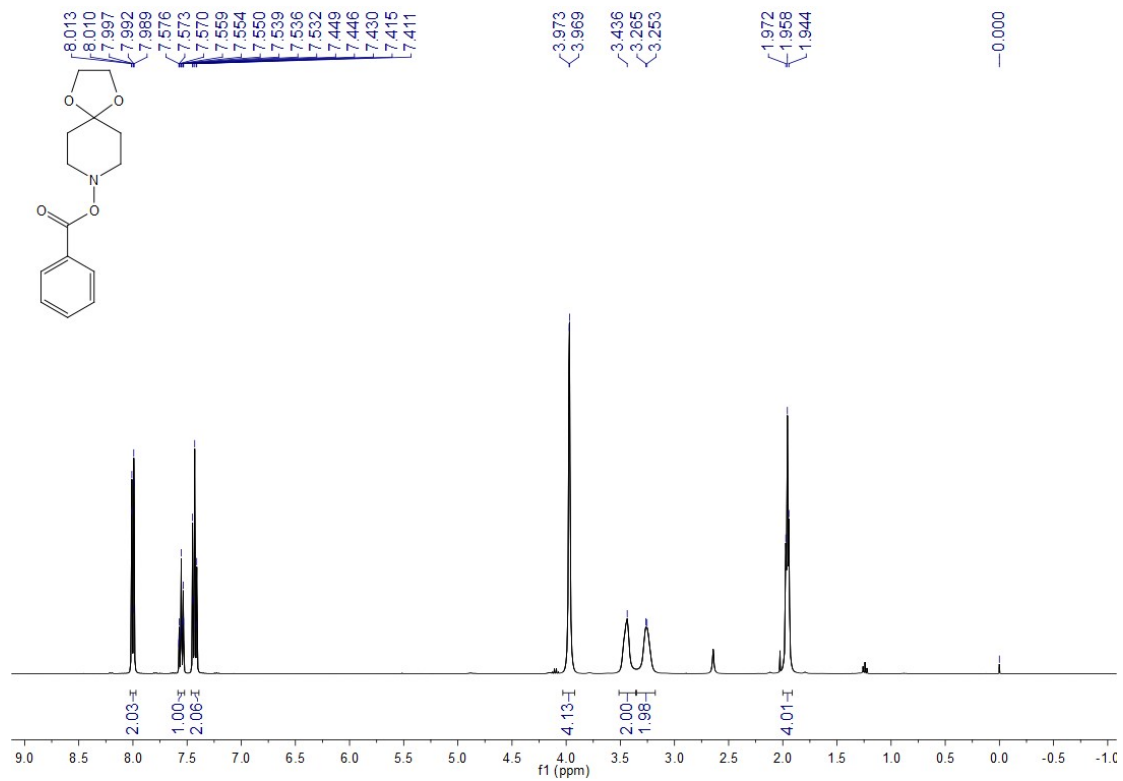

### <sup>13</sup>C NMR Spectrum of 2g

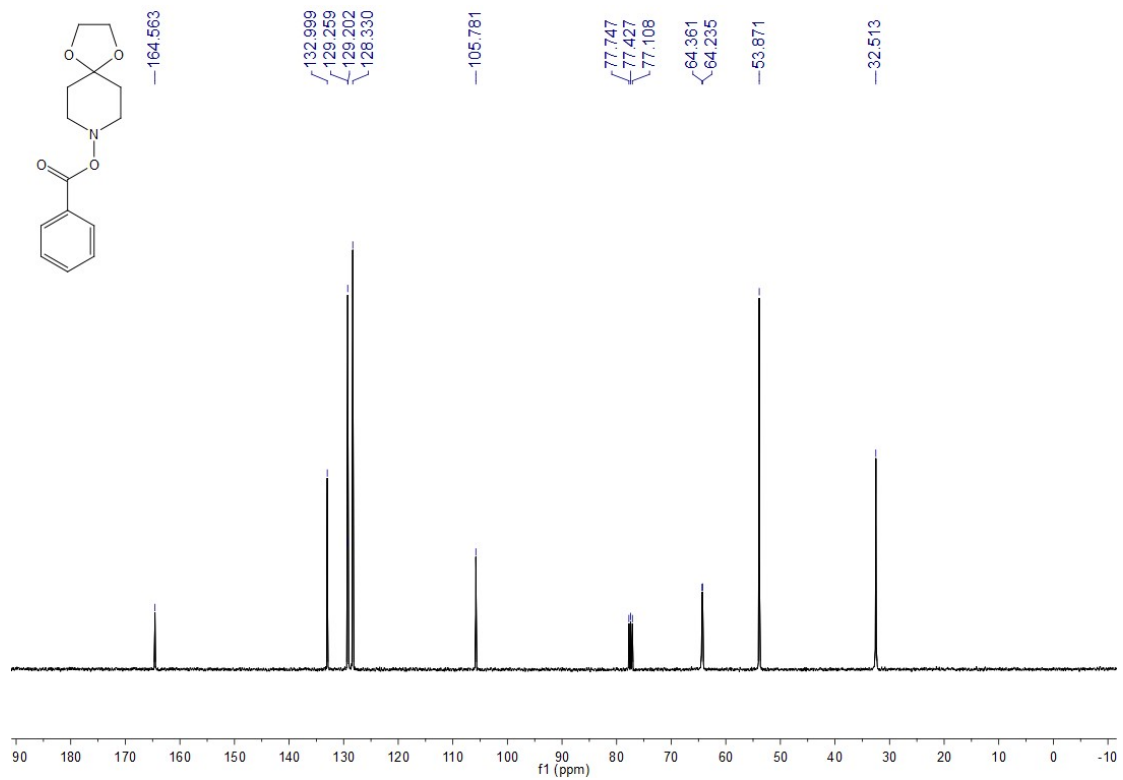

### <sup>1</sup>H NMR Spectrum of 2h

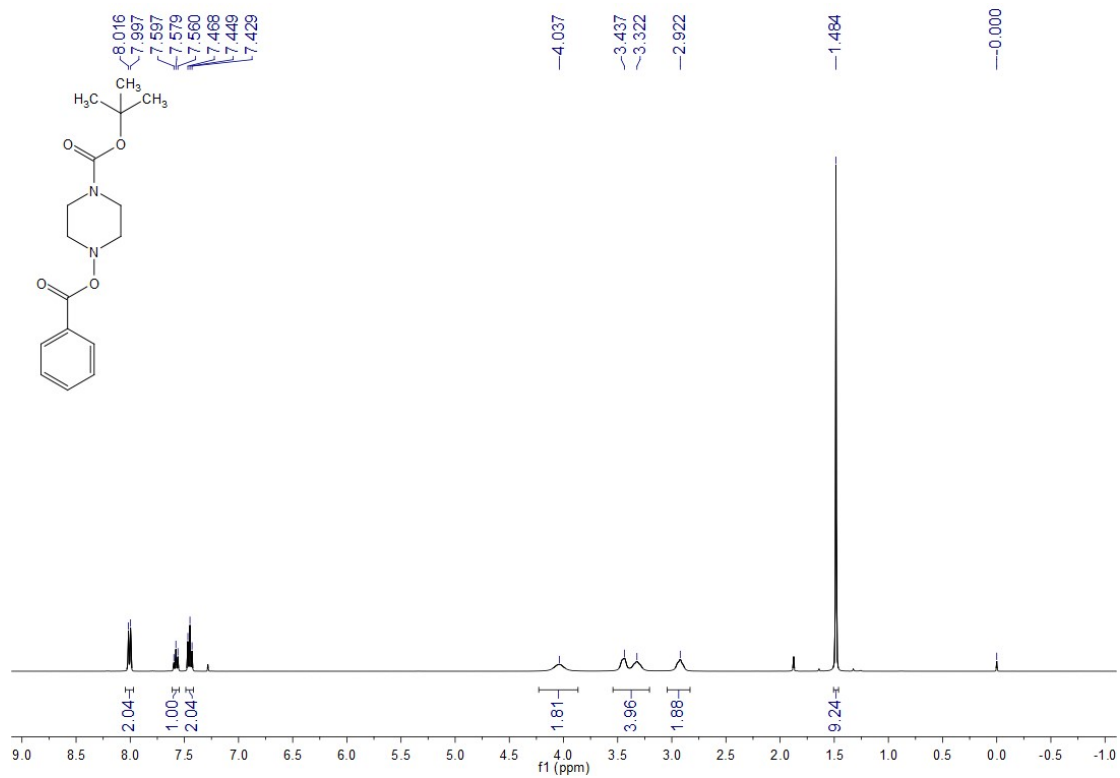

### <sup>13</sup>C NMR Spectrum of 2h

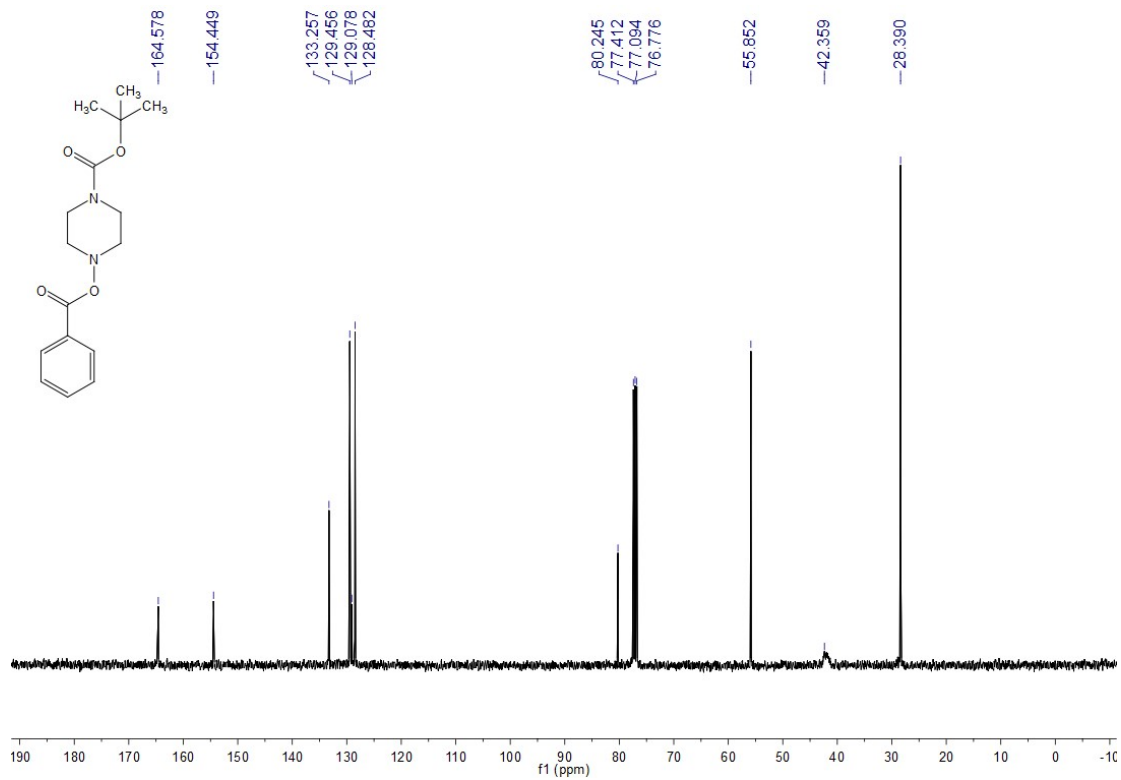

### <sup>1</sup>H NMR Spectrum of 2i

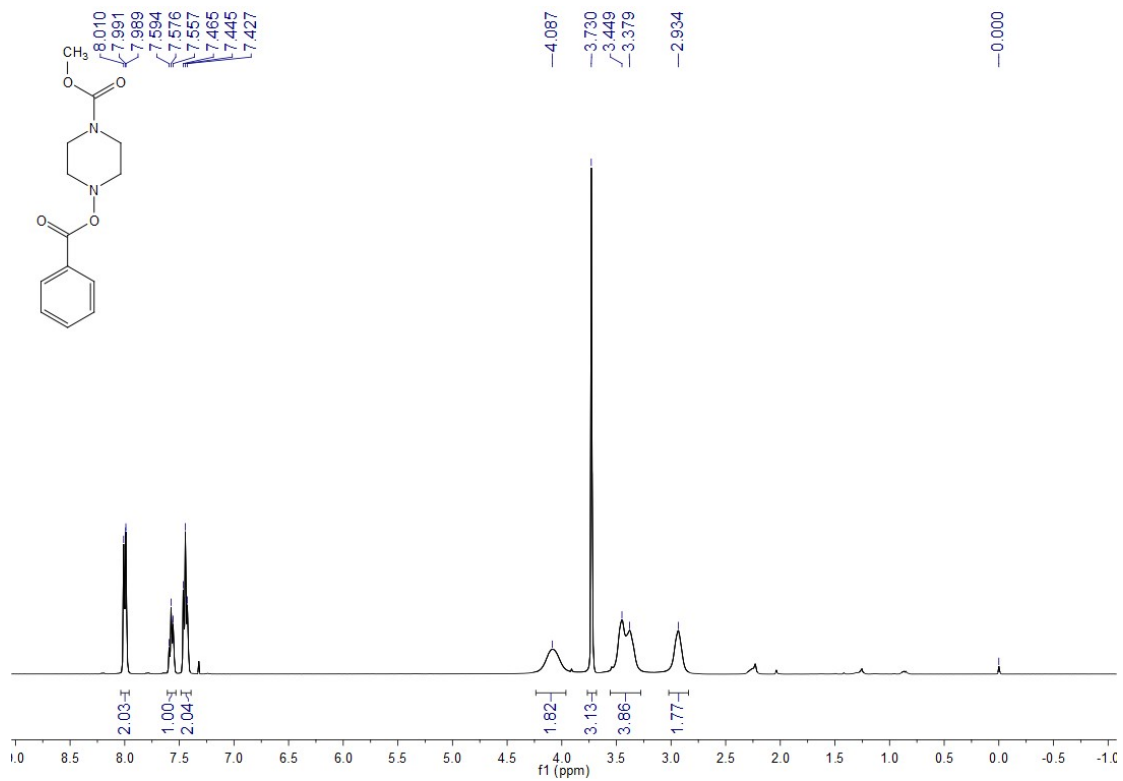

### <sup>13</sup>C NMR Spectrum of 2i

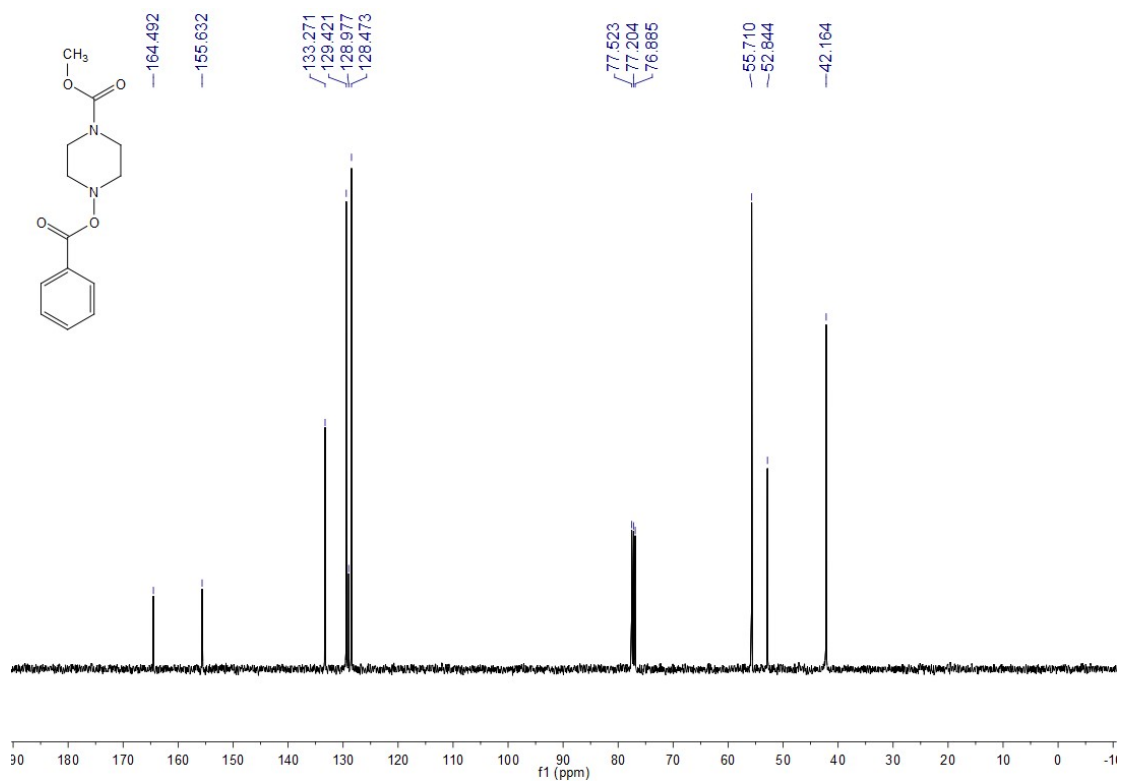

### <sup>1</sup>H NMR Spectrum of 2j

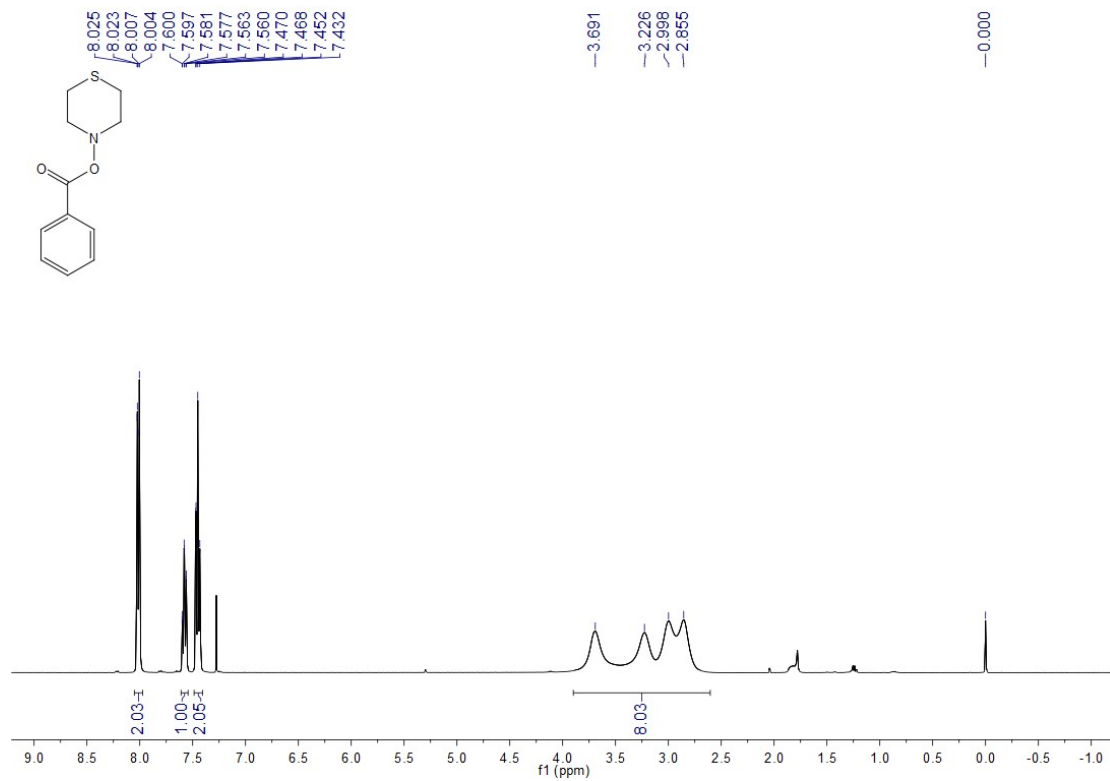

### <sup>13</sup>C NMR Spectrum of 2j

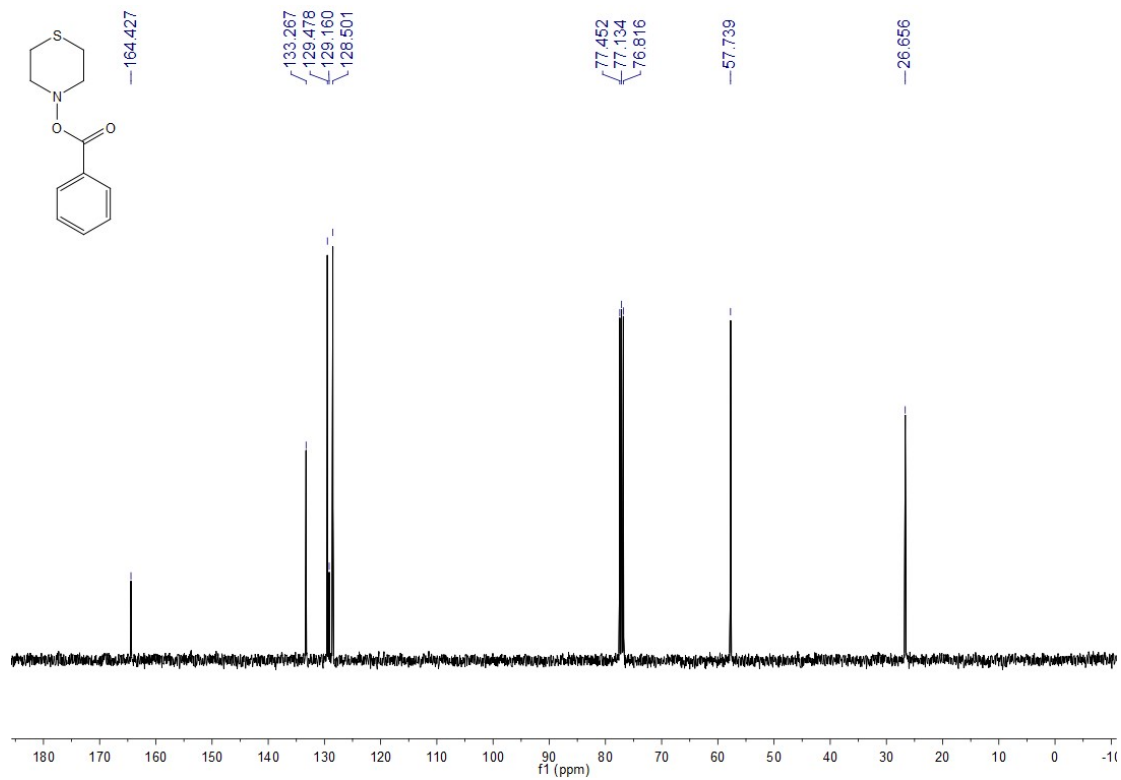

### <sup>1</sup>H NMR Spectrum of 2k

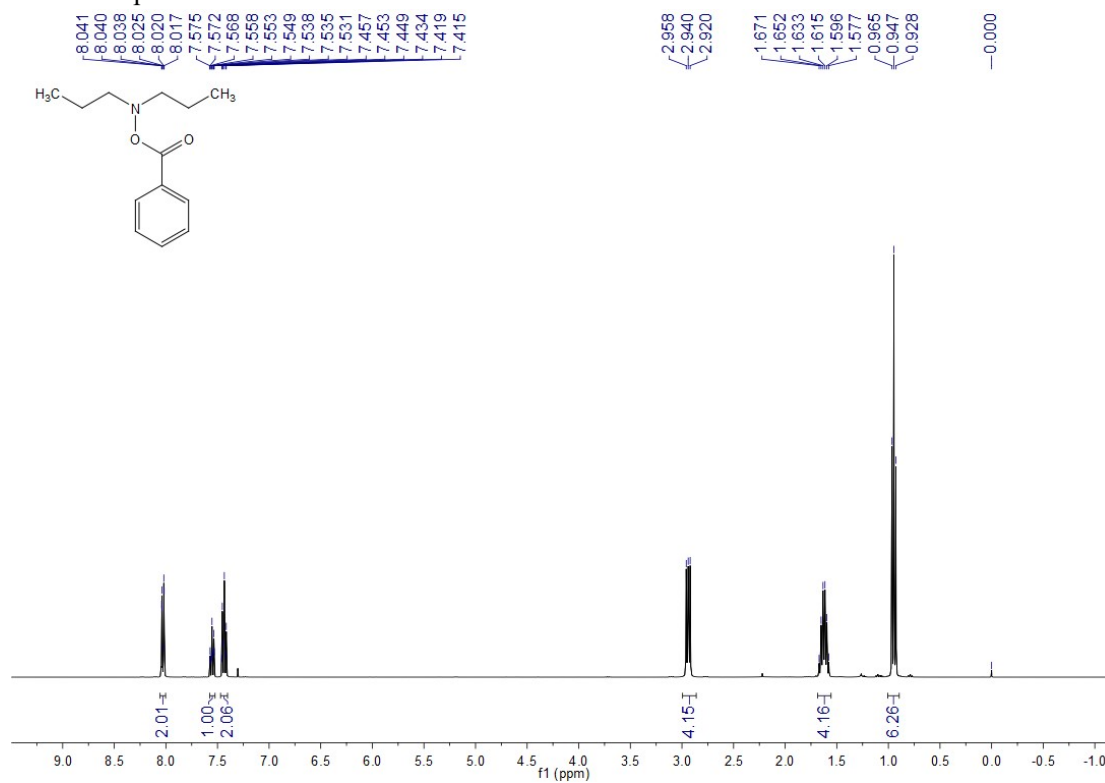

### <sup>13</sup>C NMR Spectrum of 2k

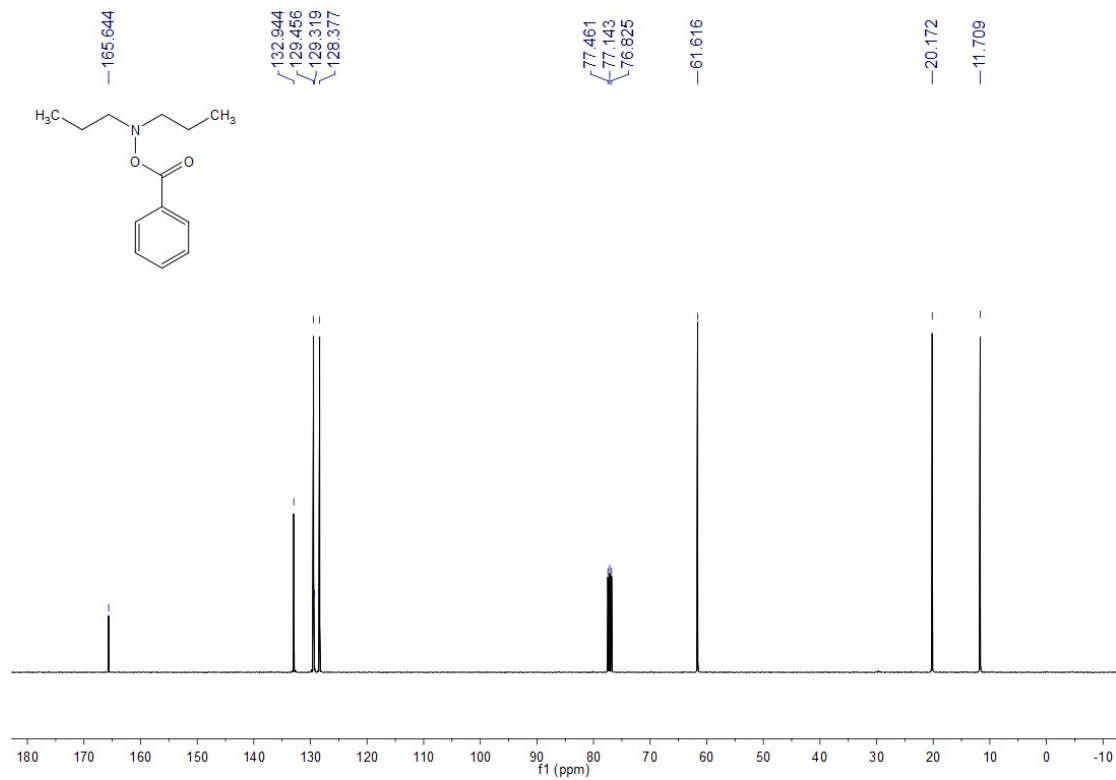



<sup>1</sup>H NMR Spectrum of N<sup>7</sup>

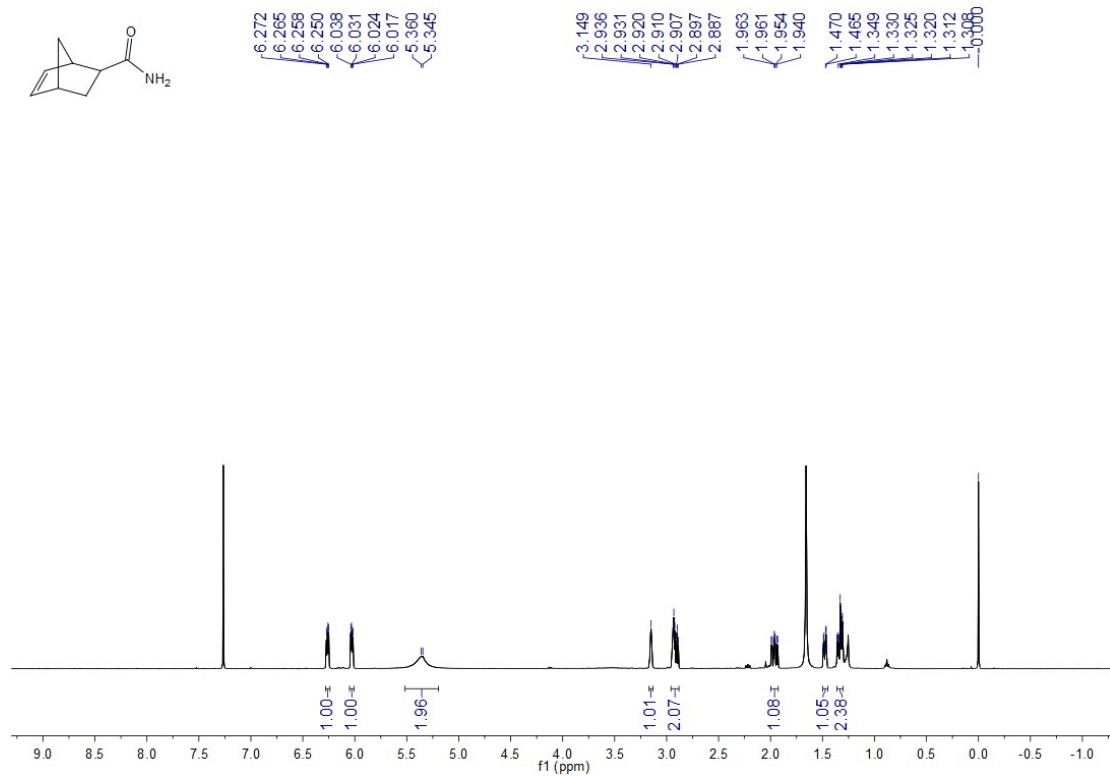

<sup>13</sup>C NMR Spectrum of N<sup>7</sup>

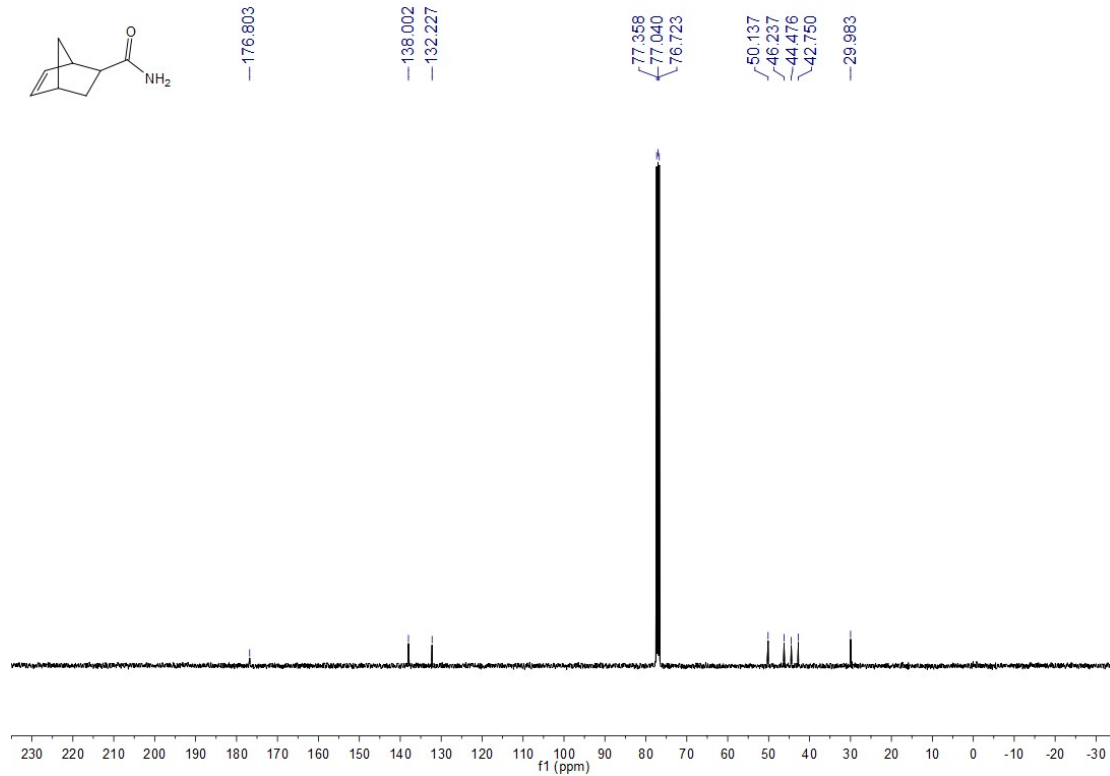

### <sup>1</sup>H NMR Spectrum of N<sup>8</sup>

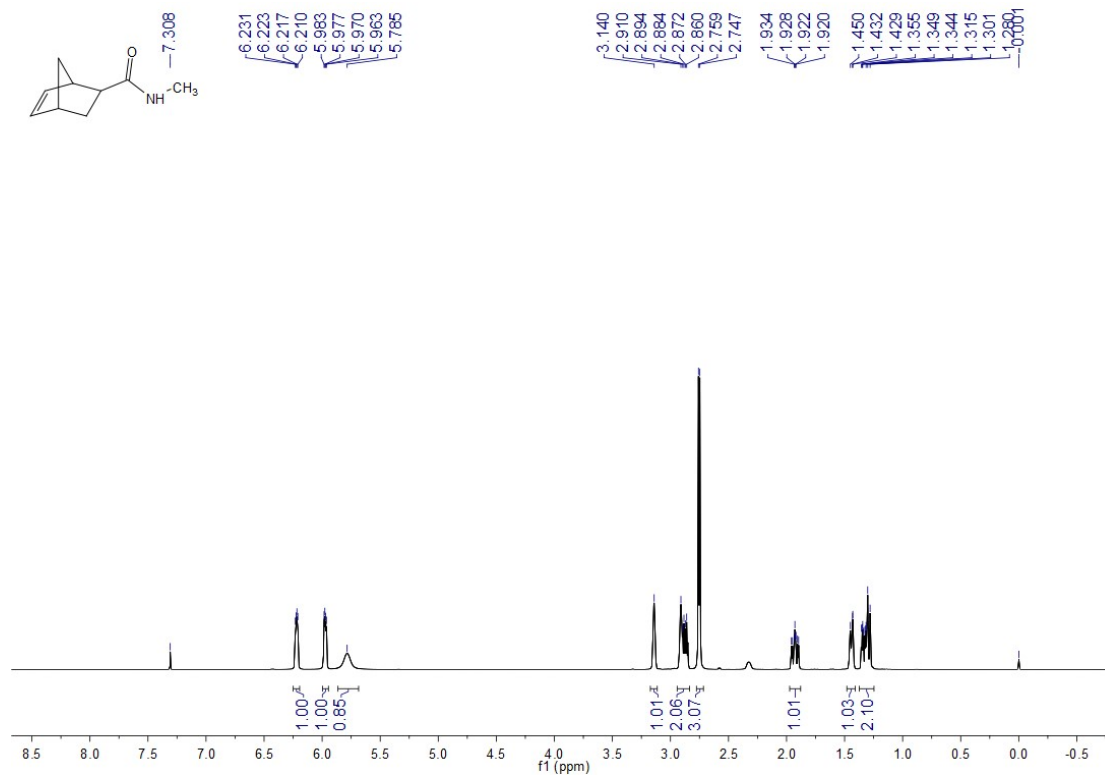

### <sup>13</sup>C NMR Spectrum of N<sup>8</sup>

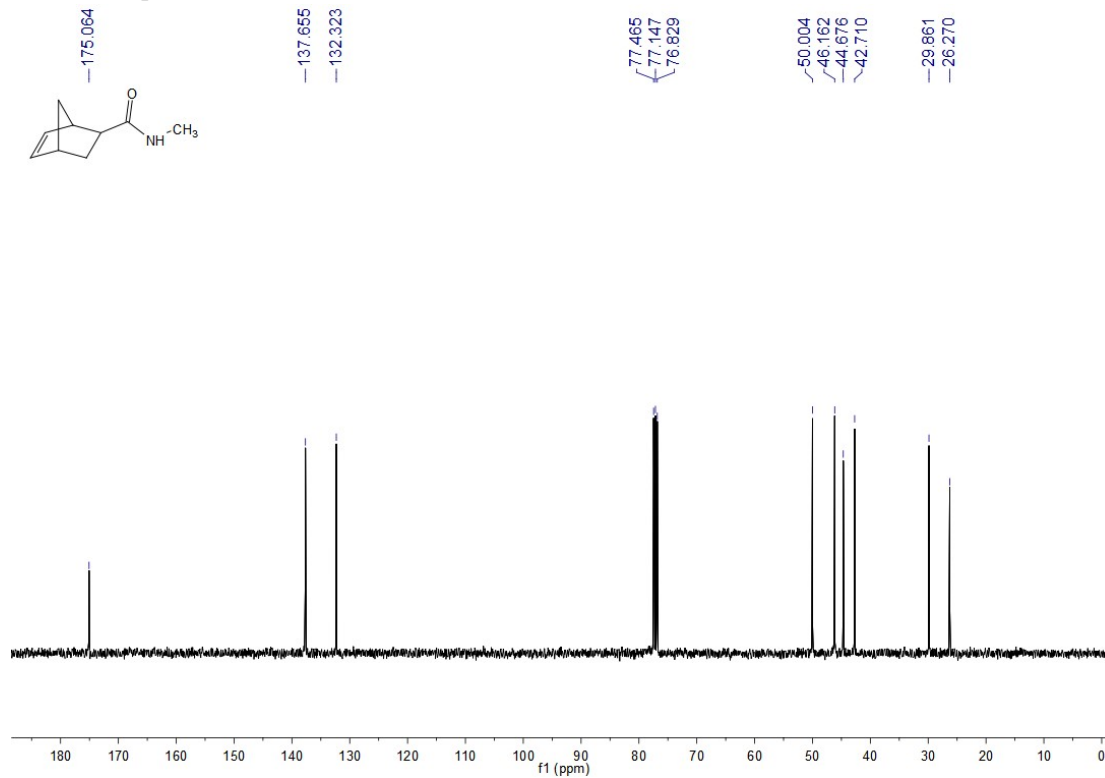

<sup>1</sup>H NMR Spectrum of N<sup>9</sup>

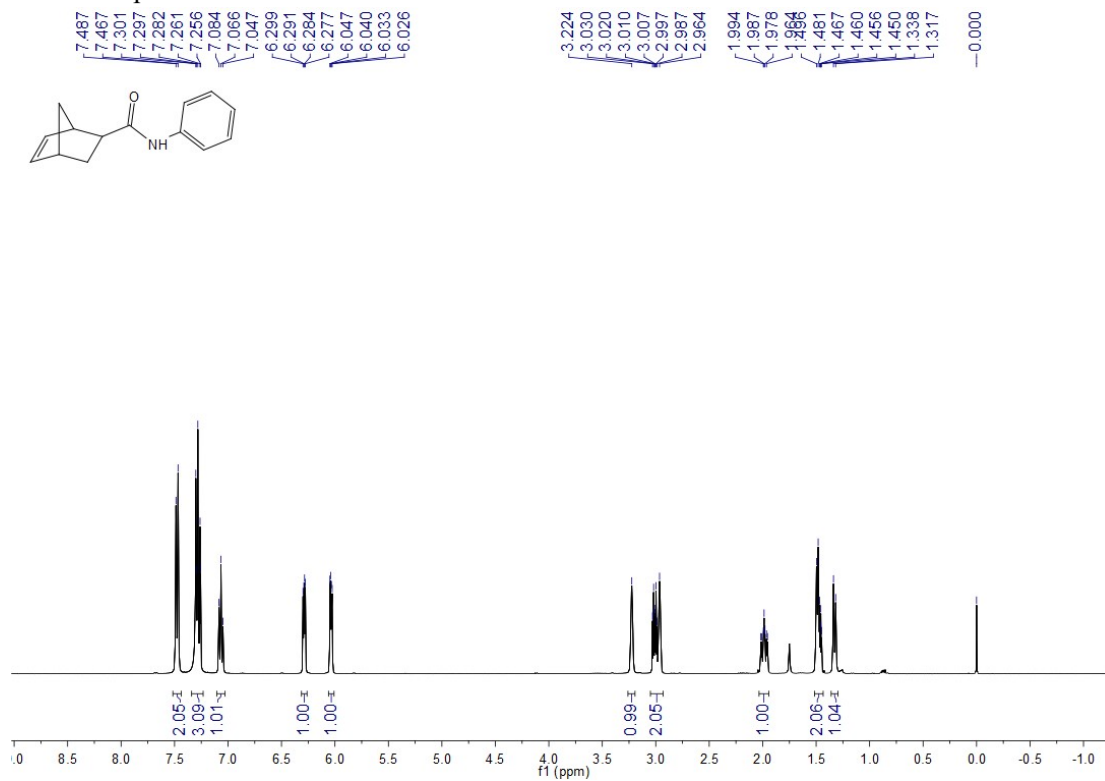

<sup>13</sup>C NMR Spectrum of N<sup>9</sup>

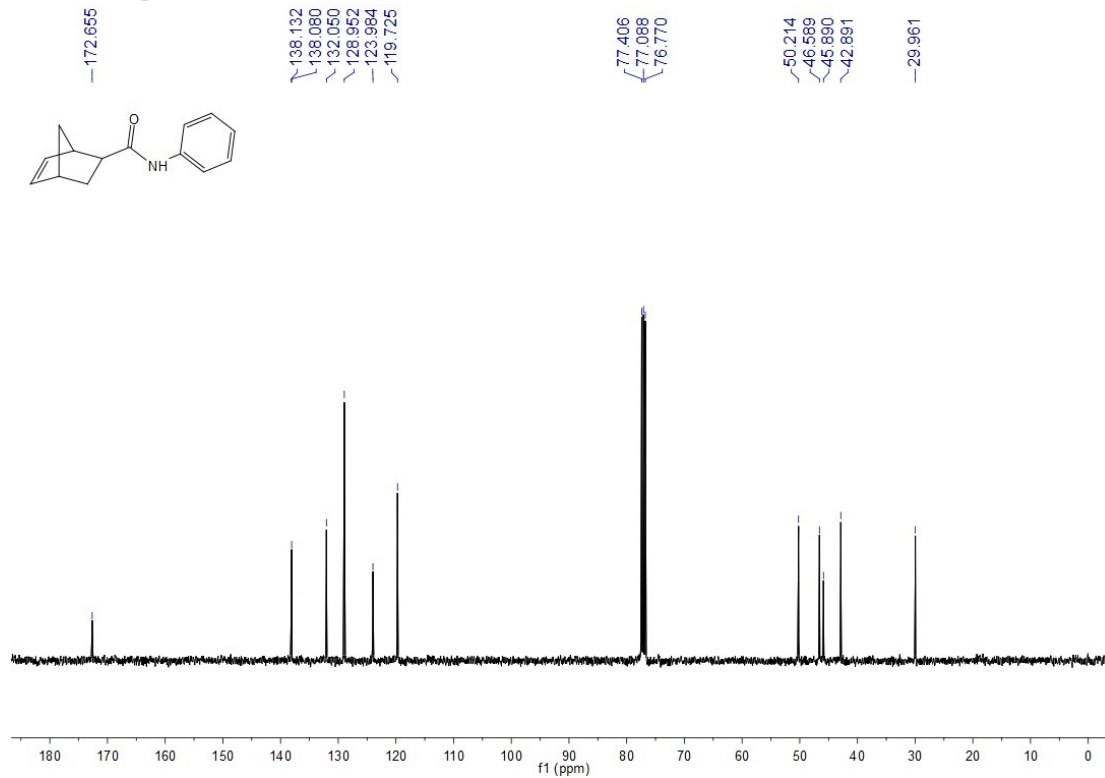

<sup>1</sup>H NMR Spectrum of N<sup>10</sup>

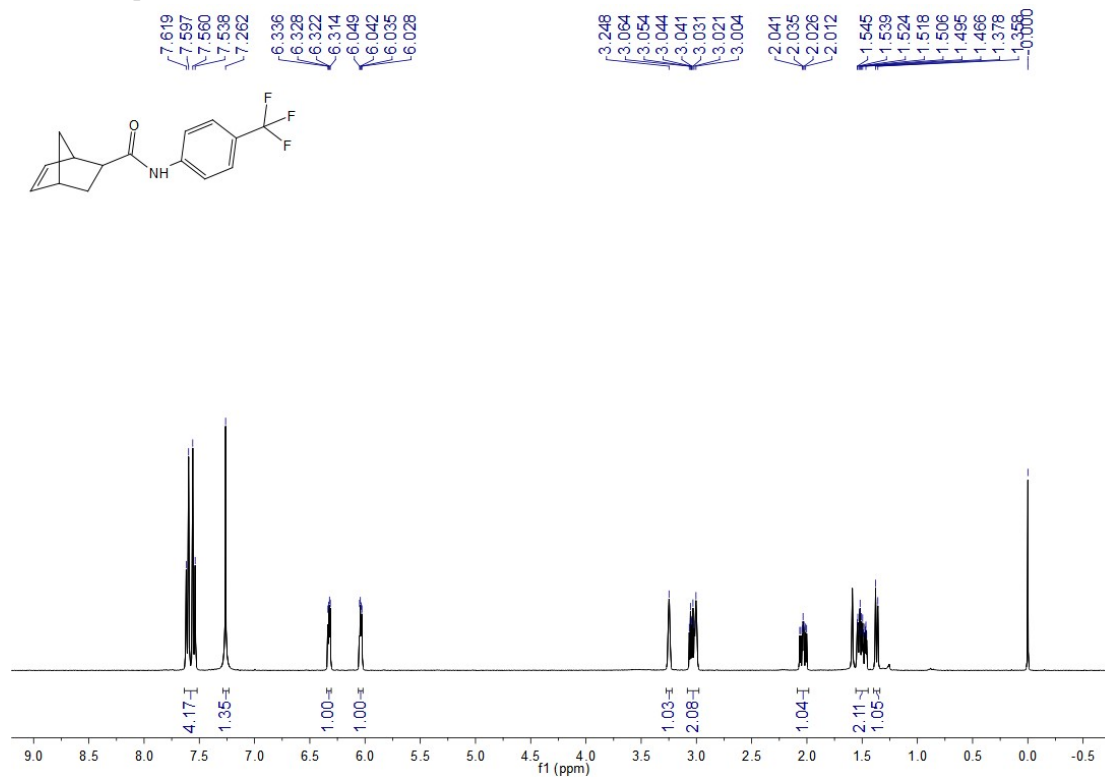

<sup>13</sup>C NMR Spectrum of N<sup>10</sup>

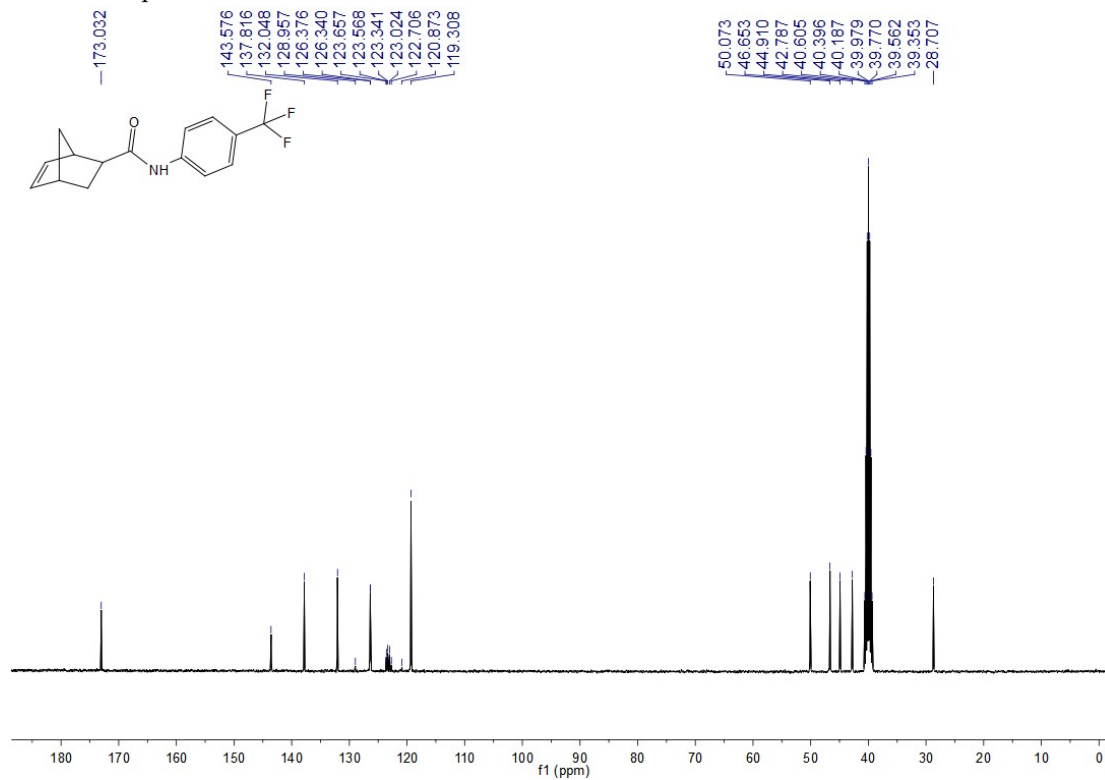

### <sup>1</sup>H NMR Spectrum of N<sup>11</sup>

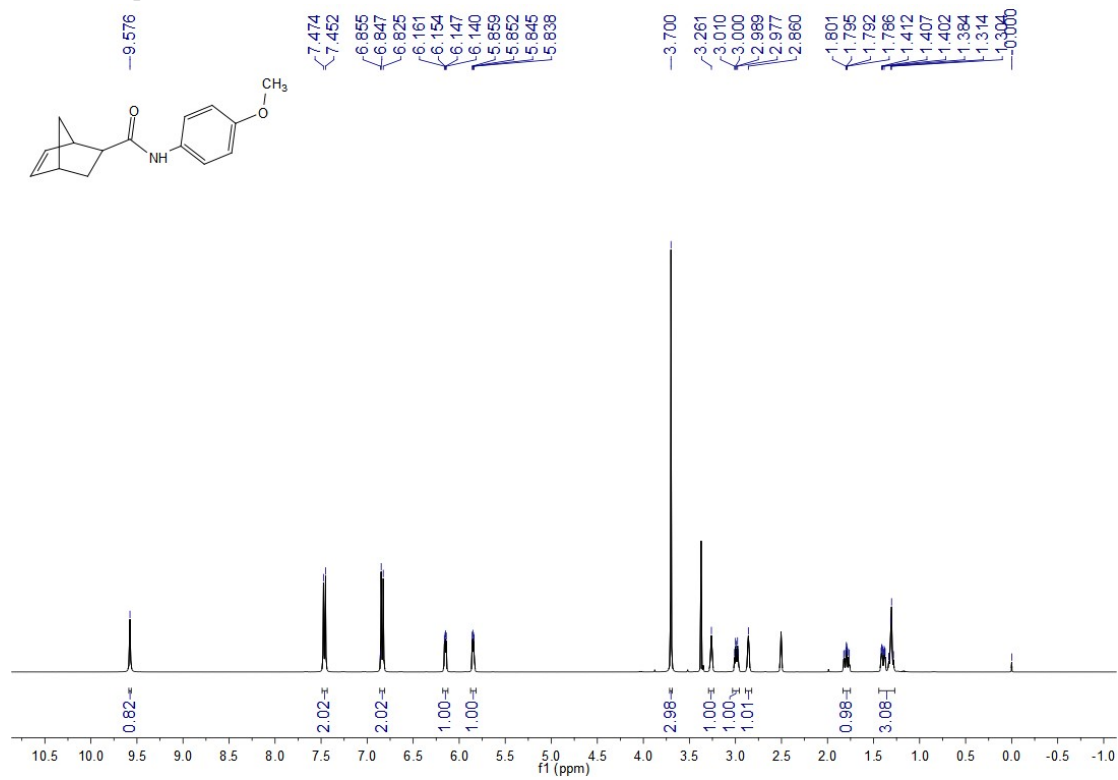

### <sup>13</sup>C NMR Spectrum of N<sup>11</sup>

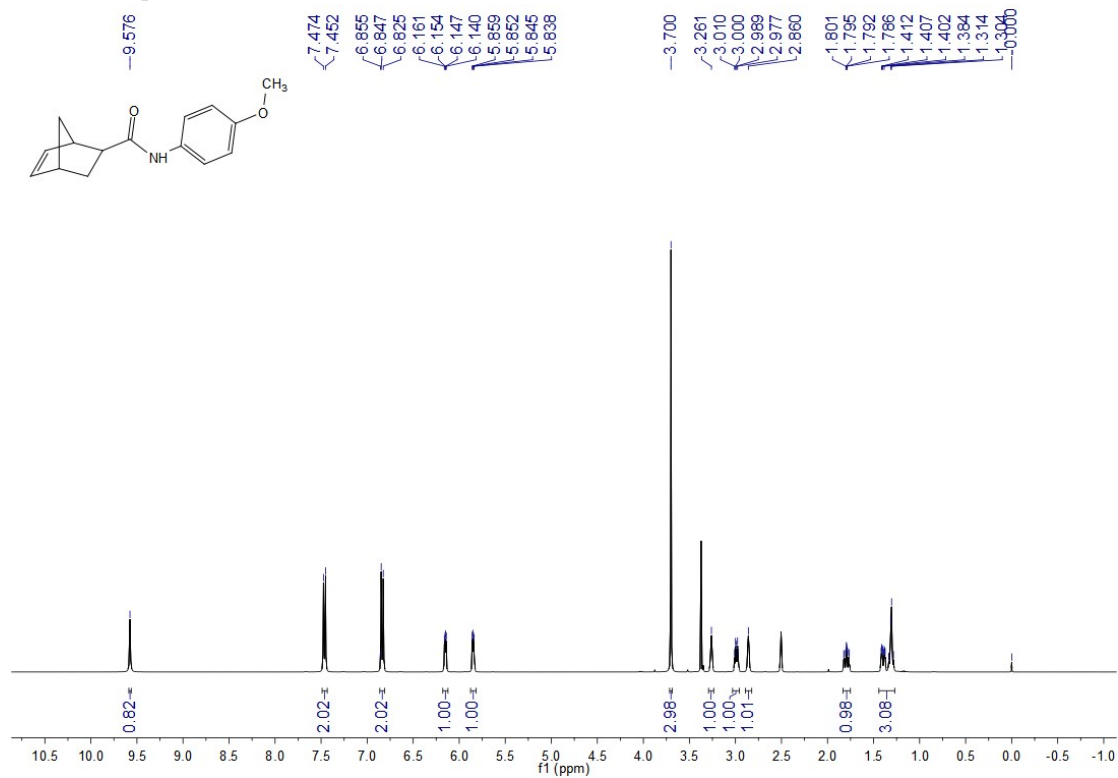

<sup>1</sup>H NMR Spectrum of N<sup>12</sup>

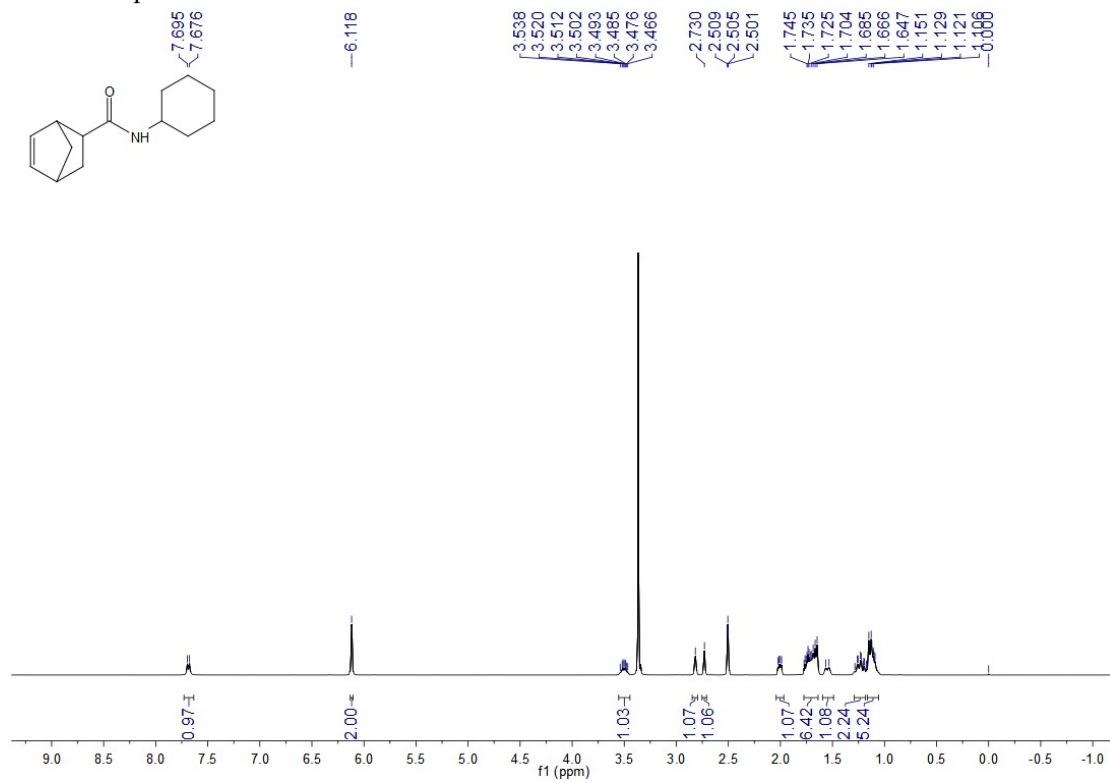

<sup>13</sup>C NMR Spectrum of N<sup>12</sup>

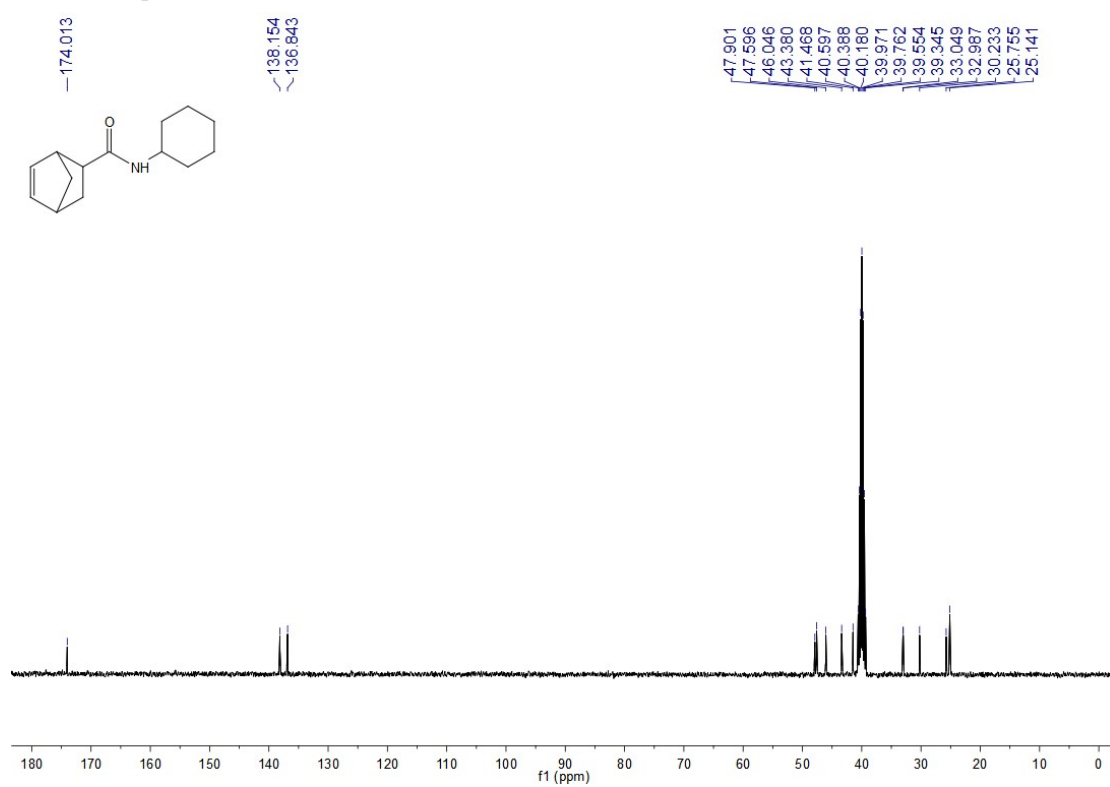

### <sup>1</sup>H NMR Spectrum of 4a

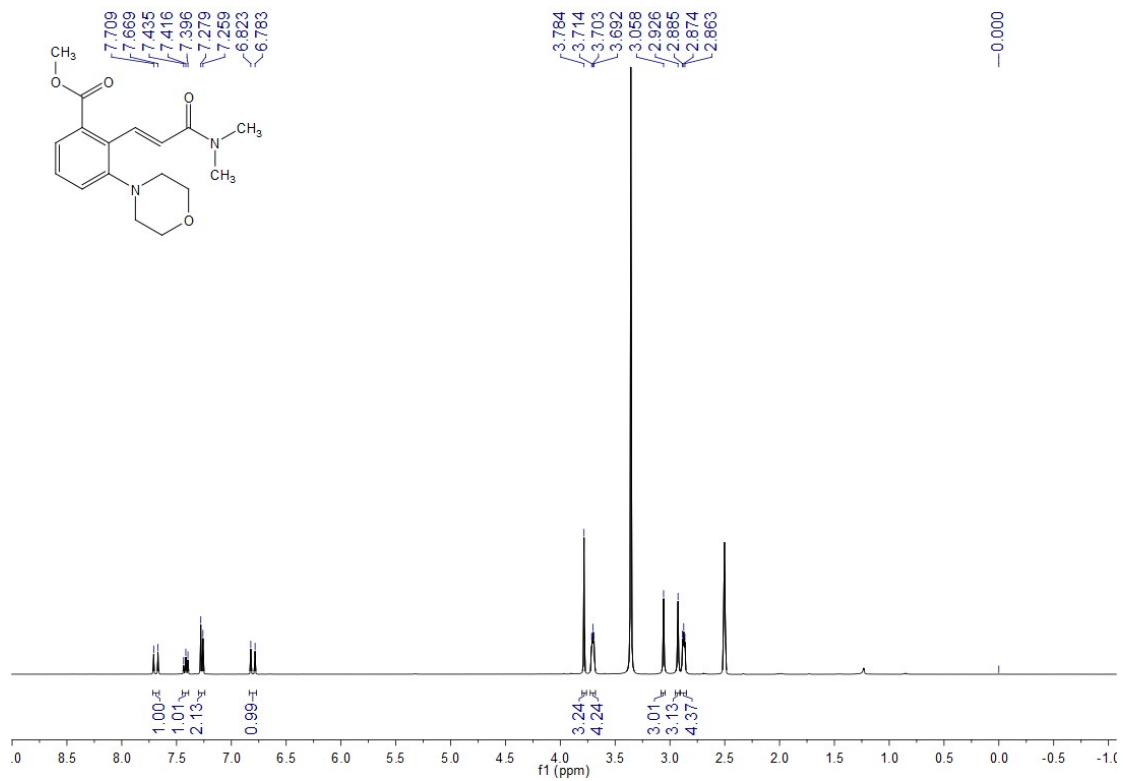

### <sup>13</sup>C NMR Spectrum of 4a

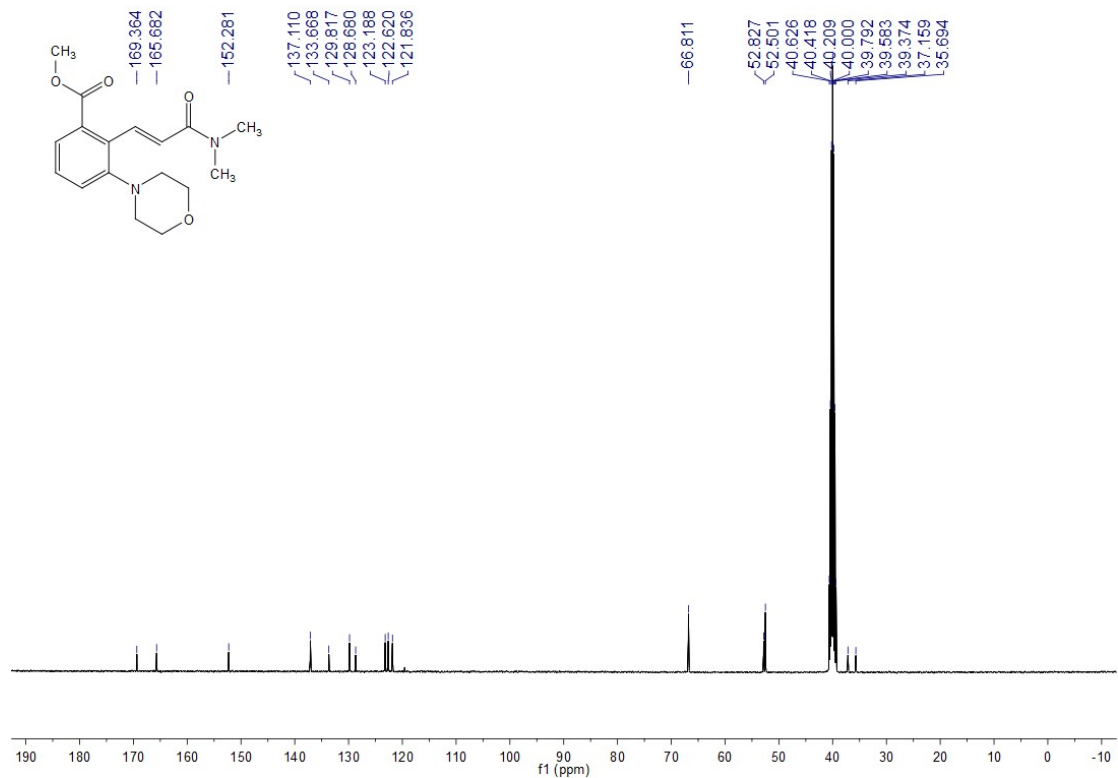

<sup>1</sup>H NMR Spectrum of **4b**

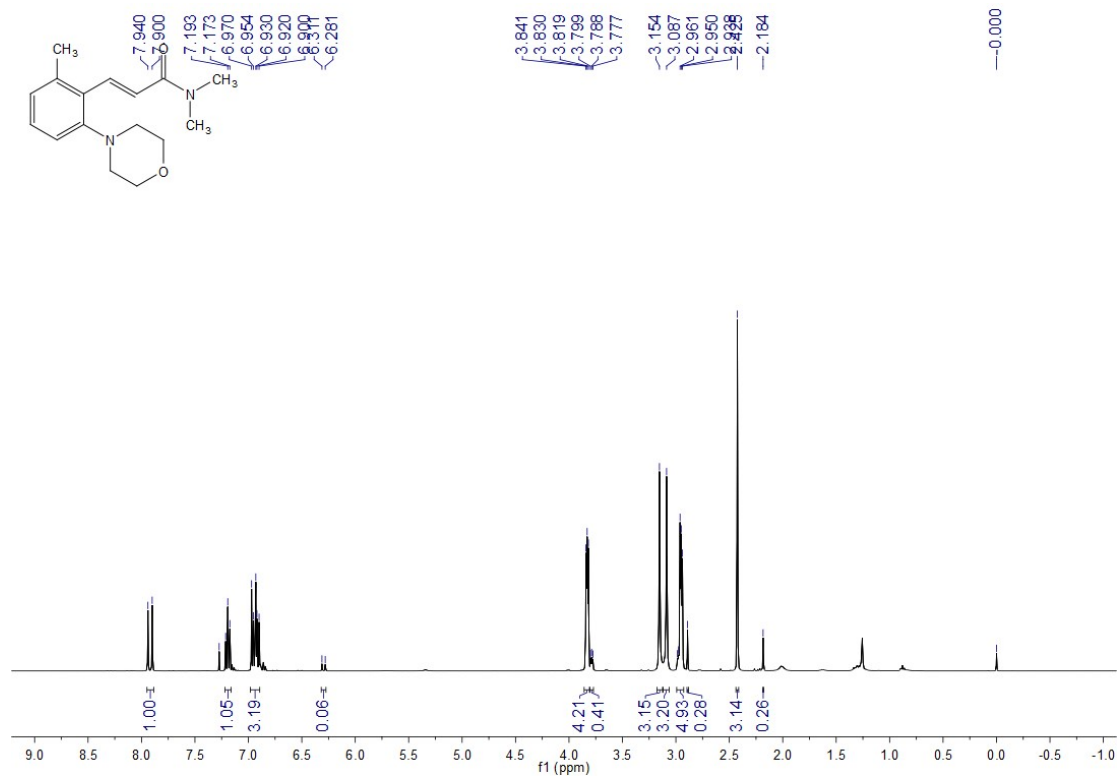

<sup>13</sup>C NMR Spectrum of **4b**

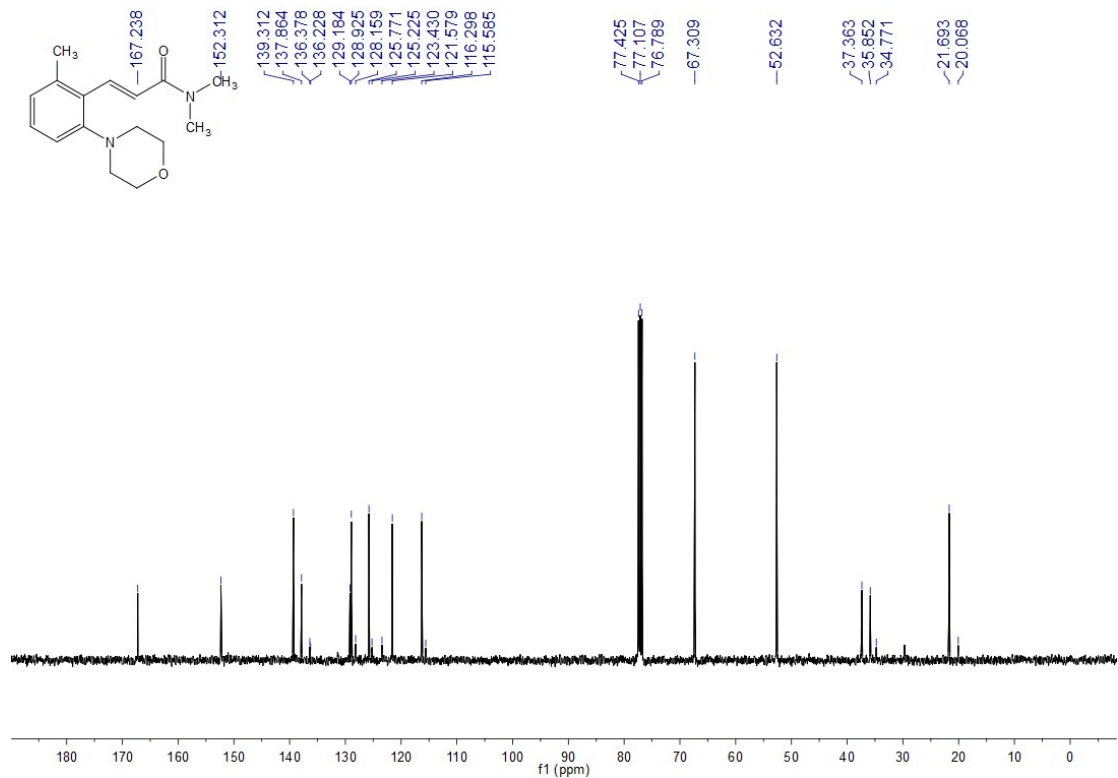



### <sup>1</sup>H NMR Spectrum of 4c

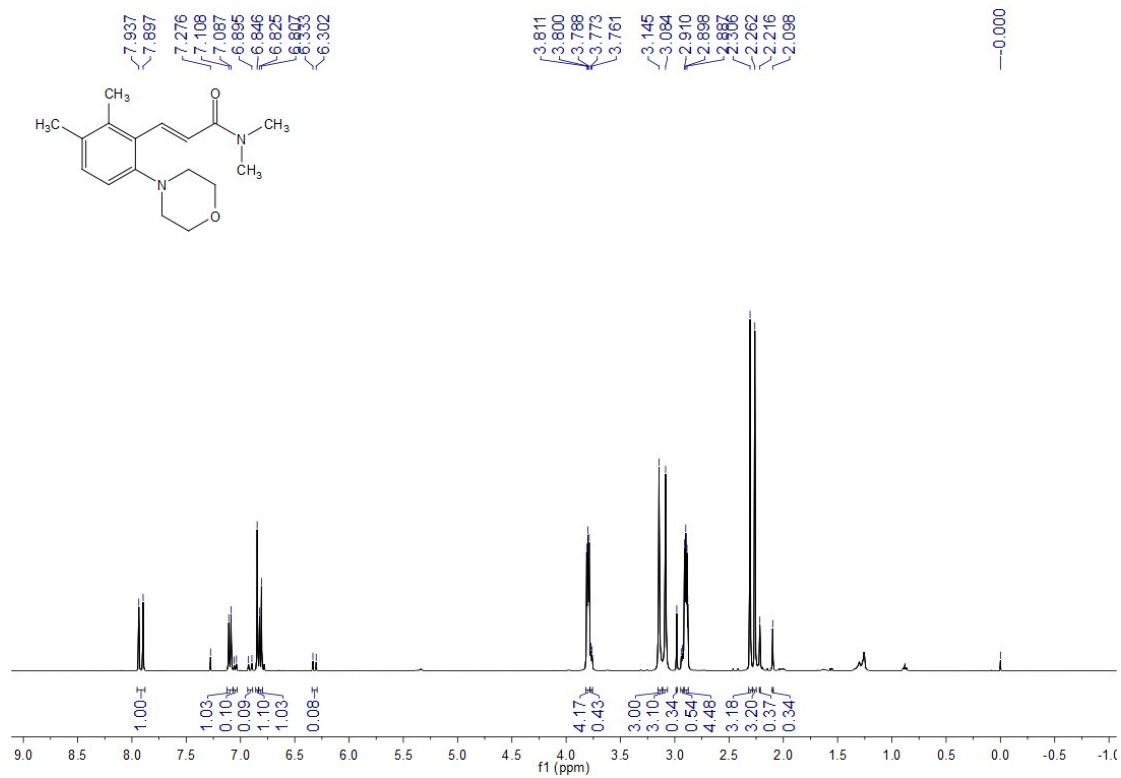

### <sup>13</sup>C NMR Spectrum of 4c

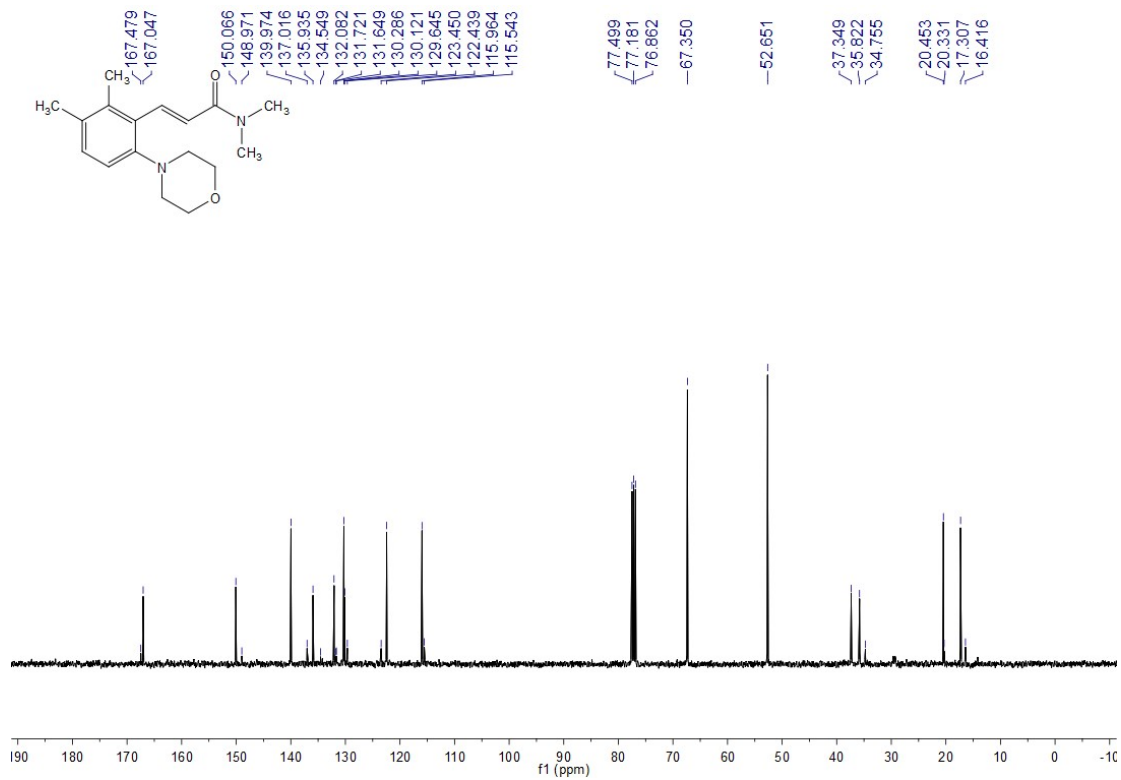

### $^1\text{H}$ NMR Spectrum of **4d**

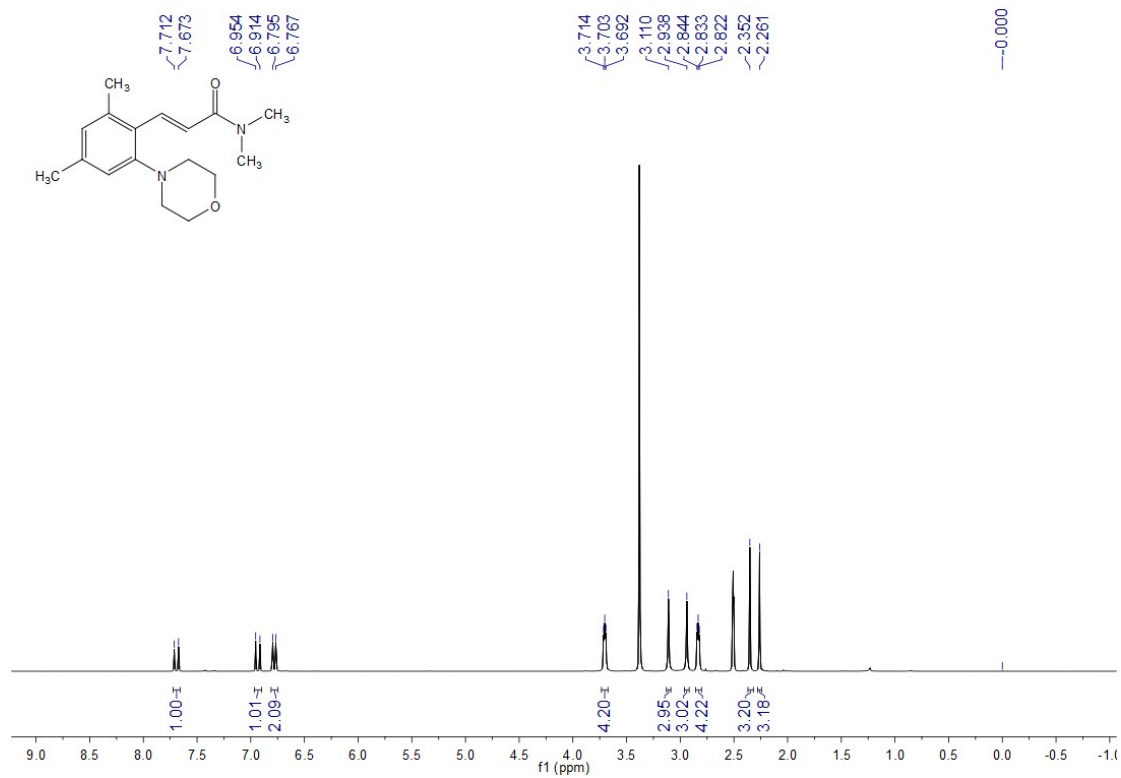

### $^{13}\text{C}$ NMR Spectrum of **4d**

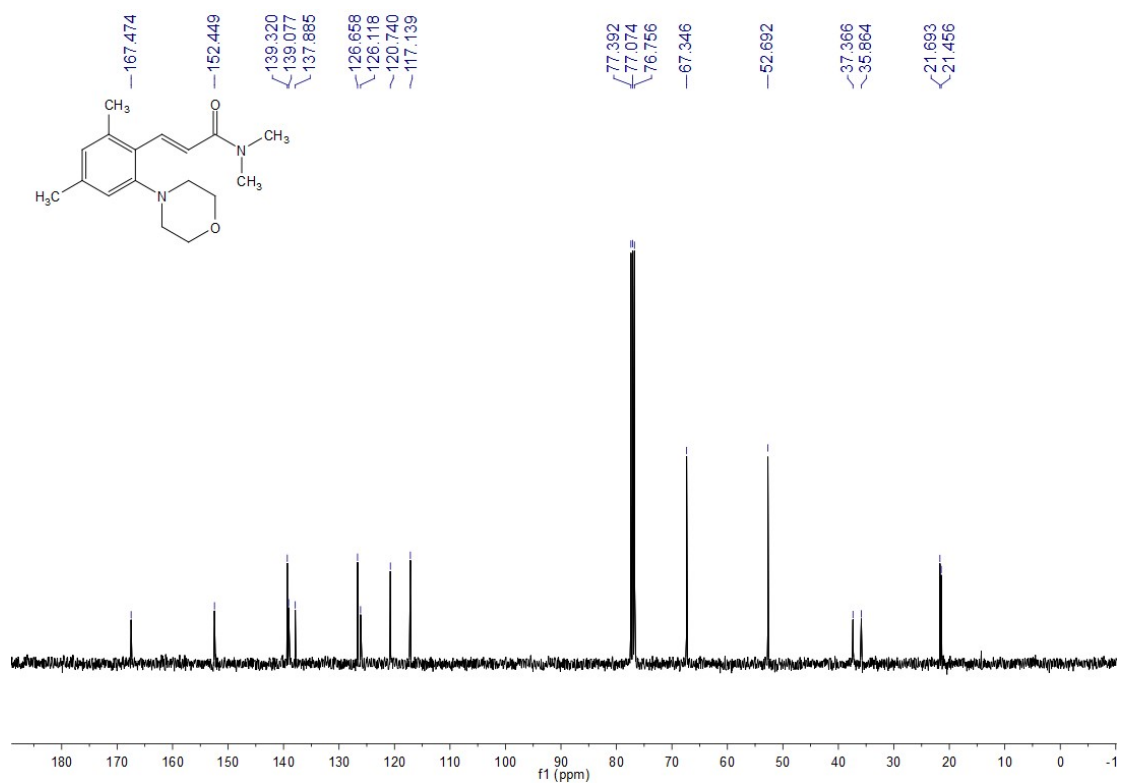

<sup>1</sup>H NMR Spectrum of 4e

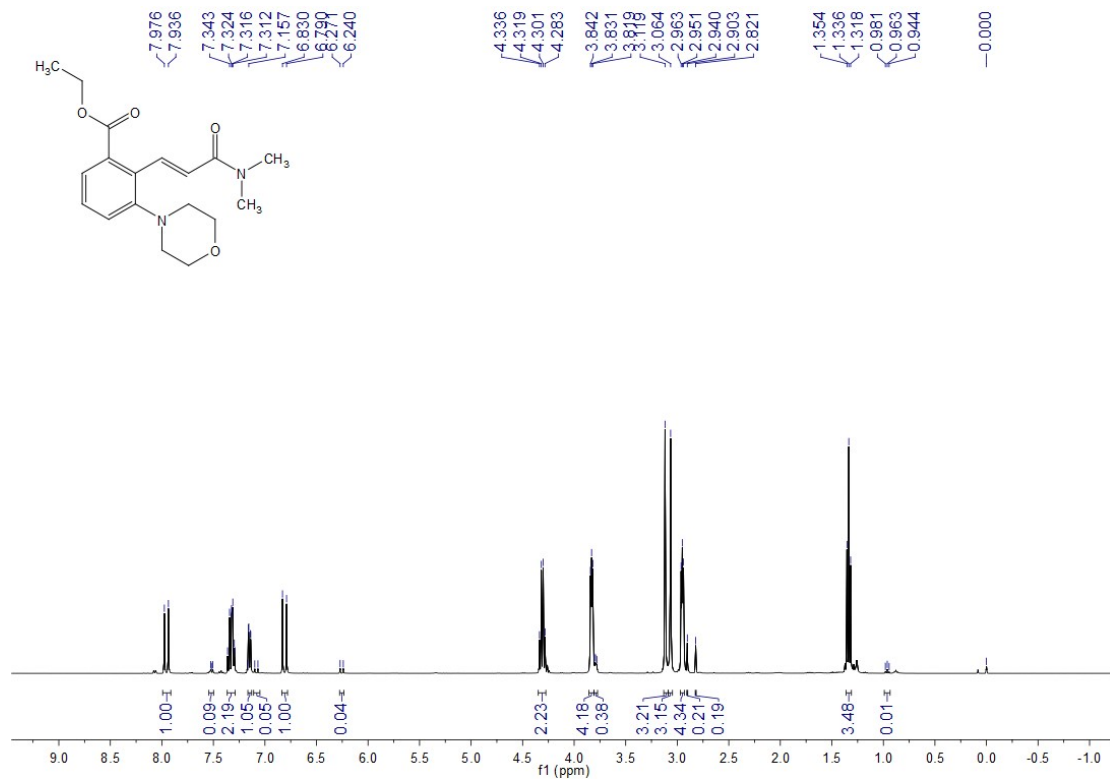

<sup>13</sup>C NMR Spectrum of 4e

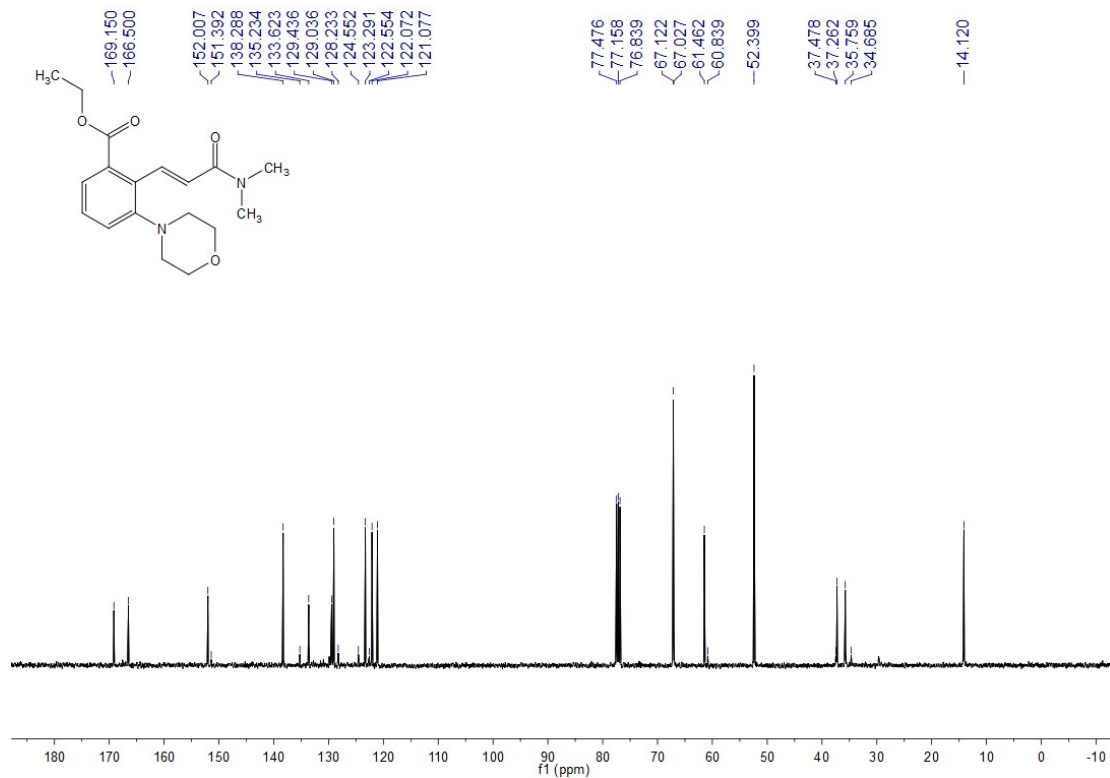

### <sup>1</sup>H NMR Spectrum of 4f

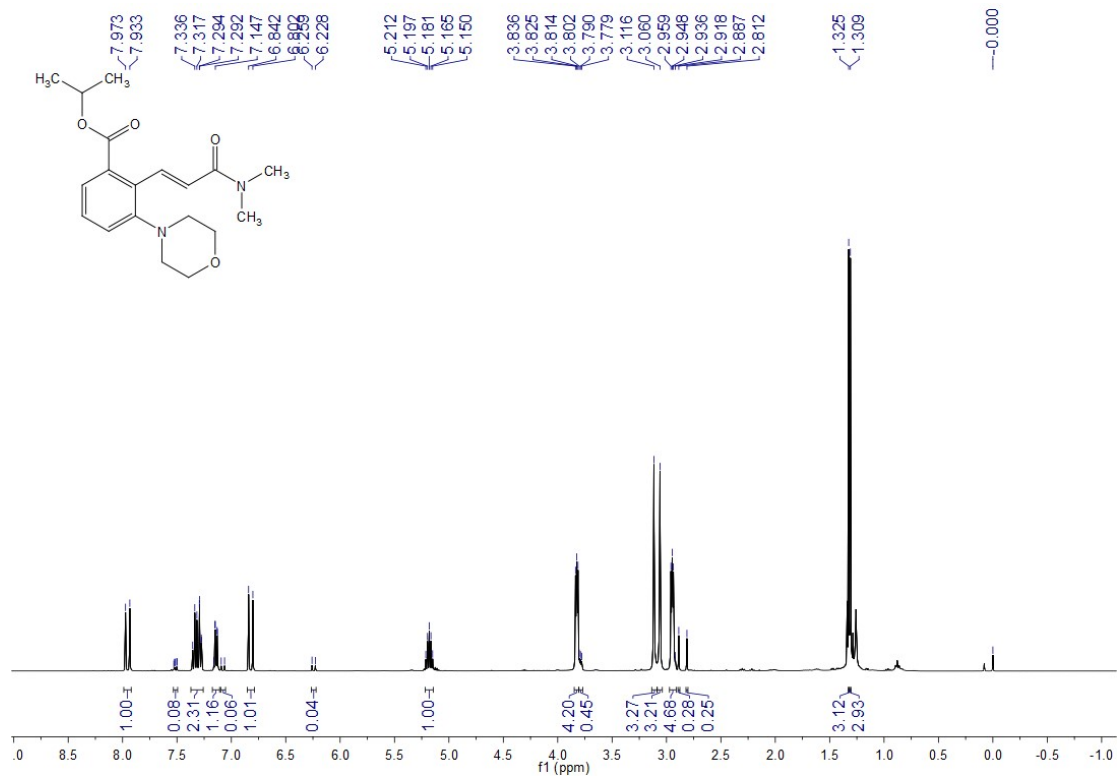

### <sup>13</sup>C NMR Spectrum of 4f

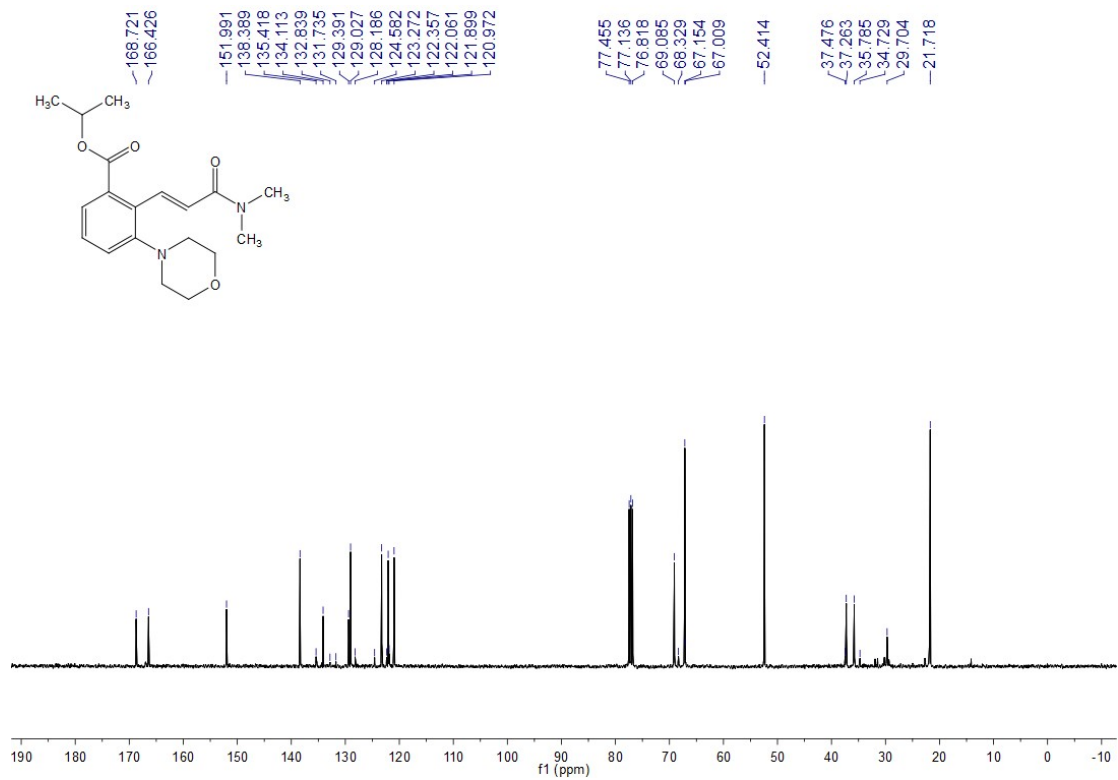

### <sup>1</sup>H NMR Spectrum of 4g

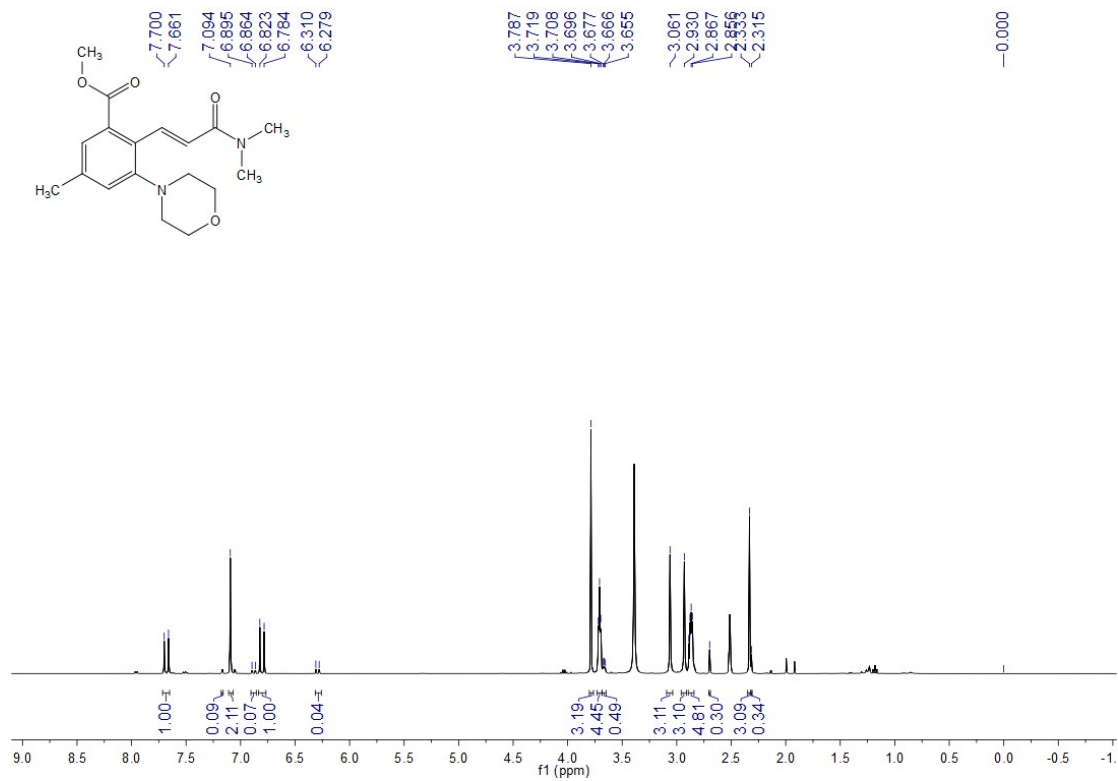

### <sup>13</sup>C NMR Spectrum of 4g

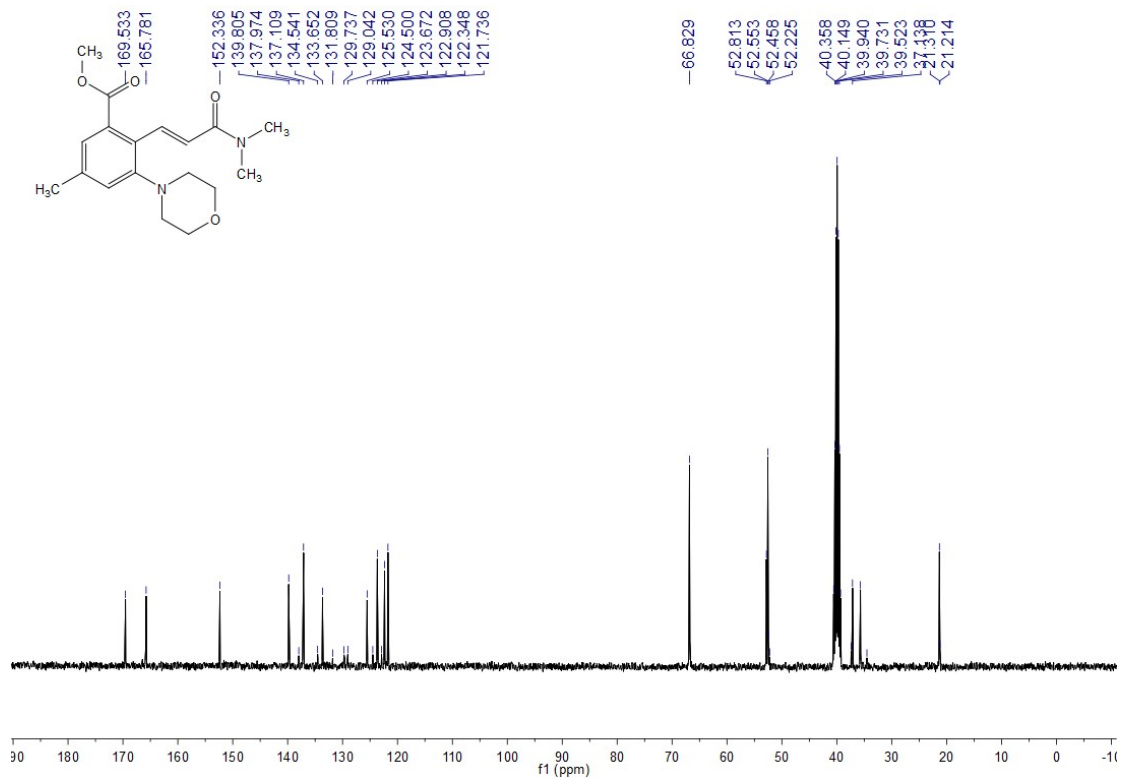

<sup>1</sup>H NMR Spectrum of **4h**

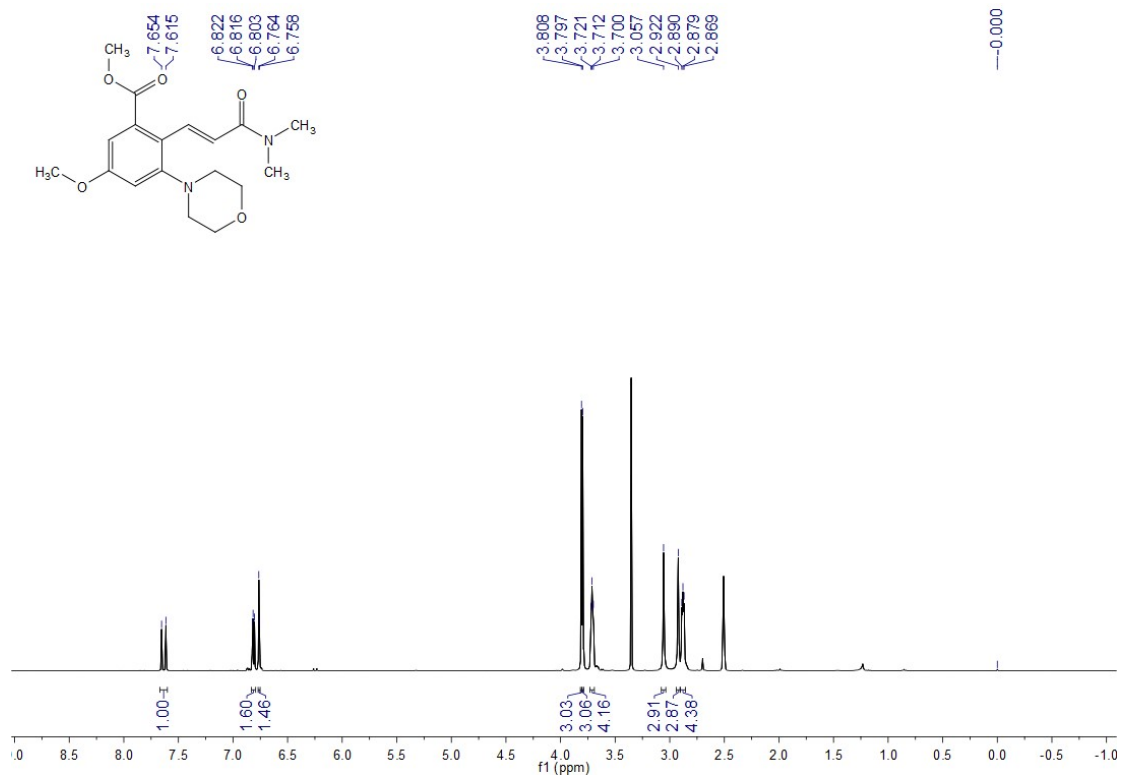

<sup>13</sup>C NMR Spectrum of **4h**

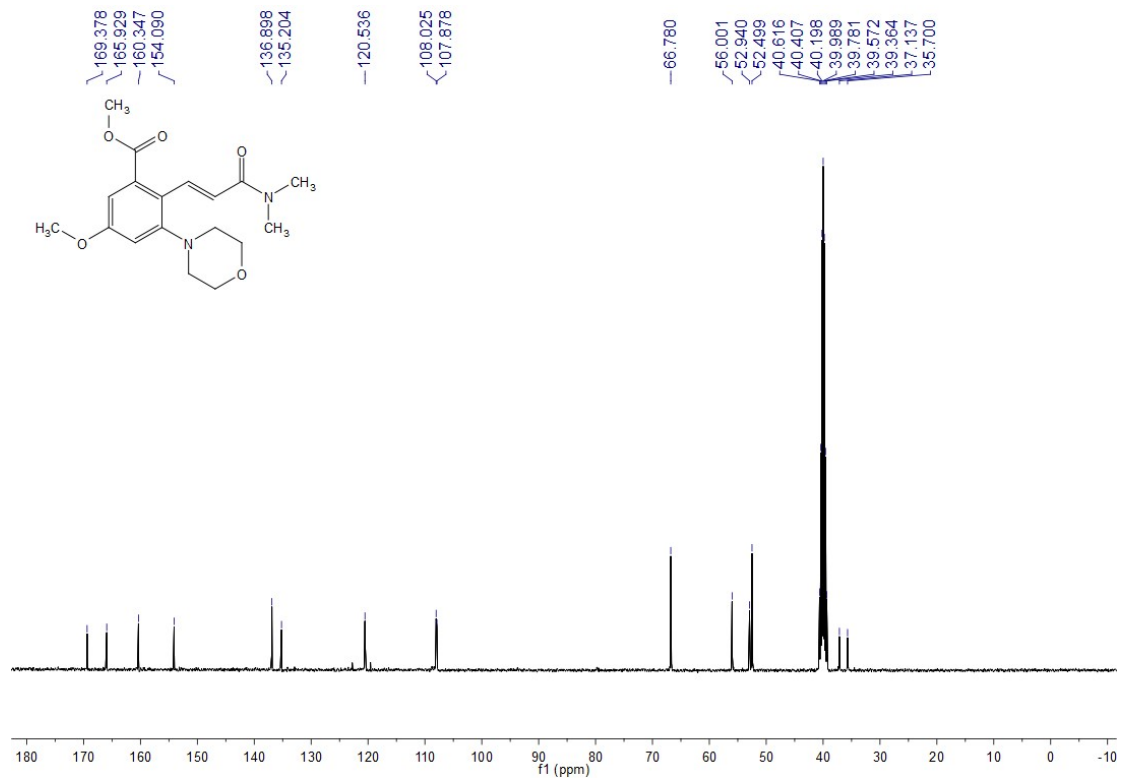

### <sup>1</sup>H NMR Spectrum of **4i**

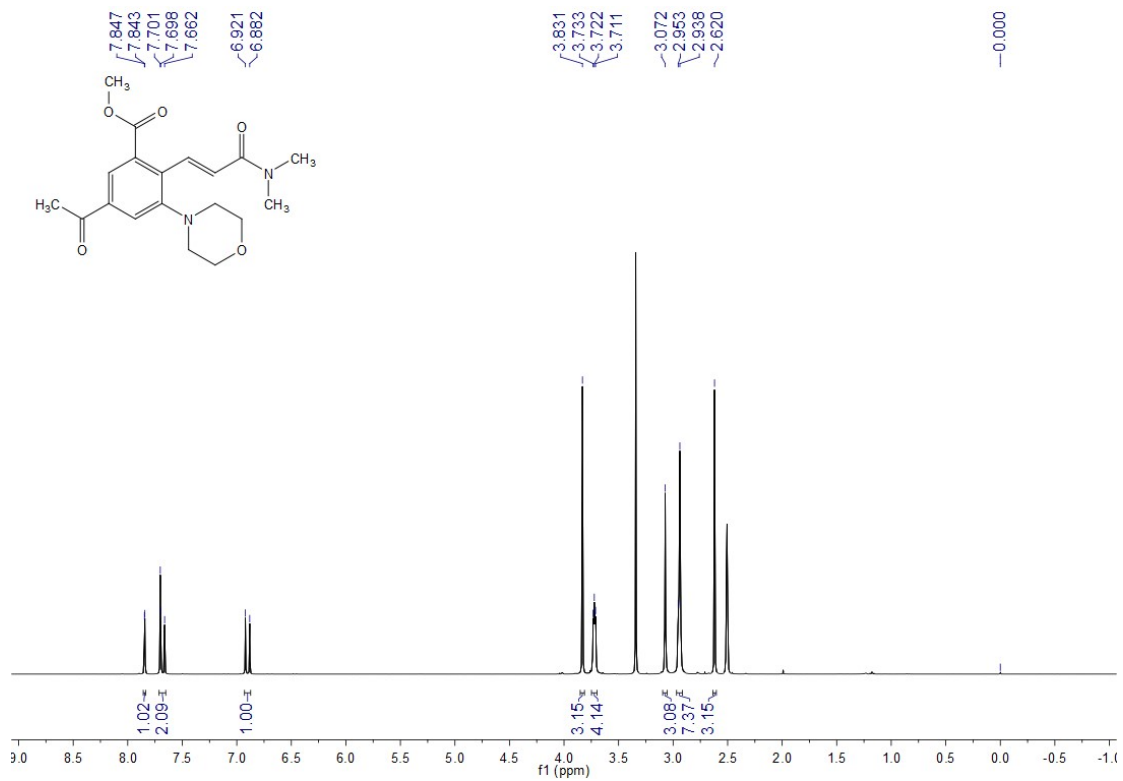

### <sup>13</sup>C NMR Spectrum of **4i**

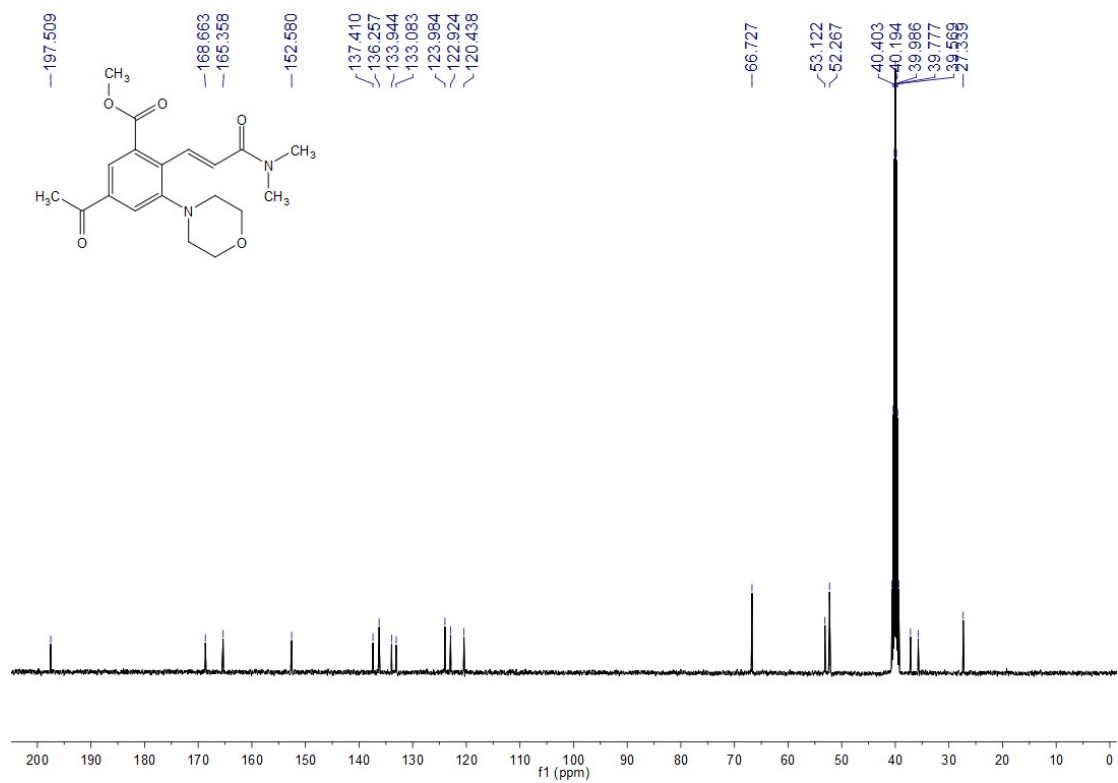

### <sup>1</sup>H NMR Spectrum of 4j

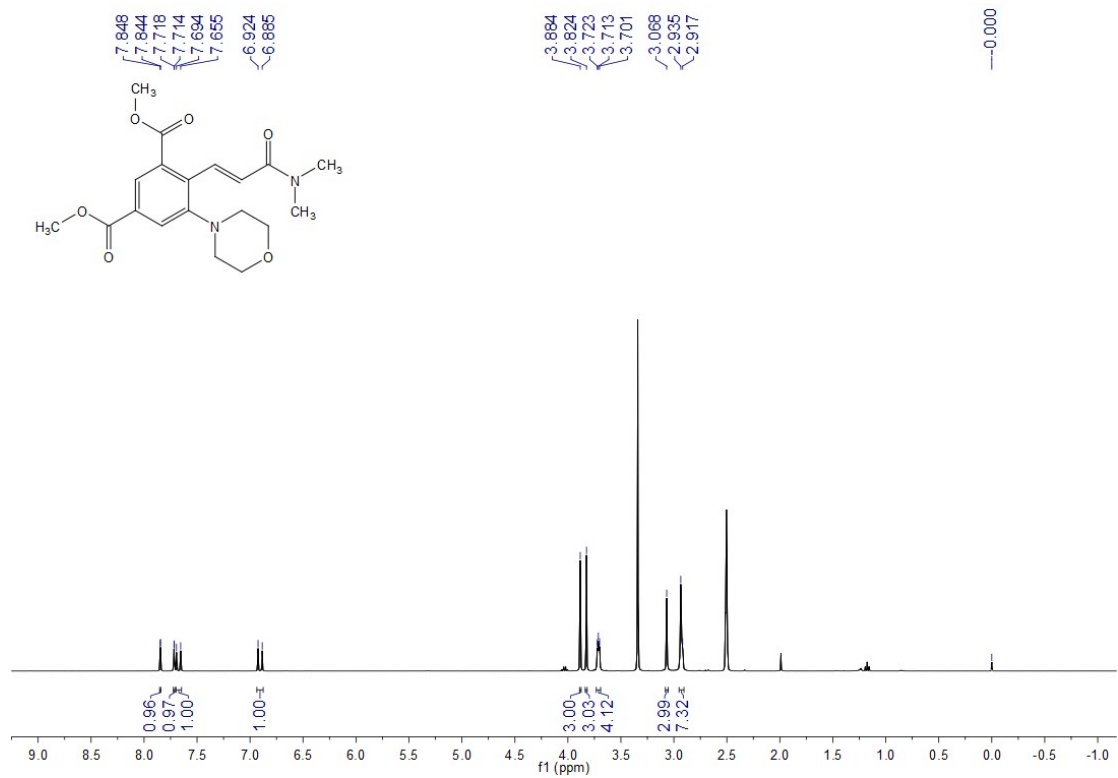

### <sup>13</sup>C NMR Spectrum of 4j

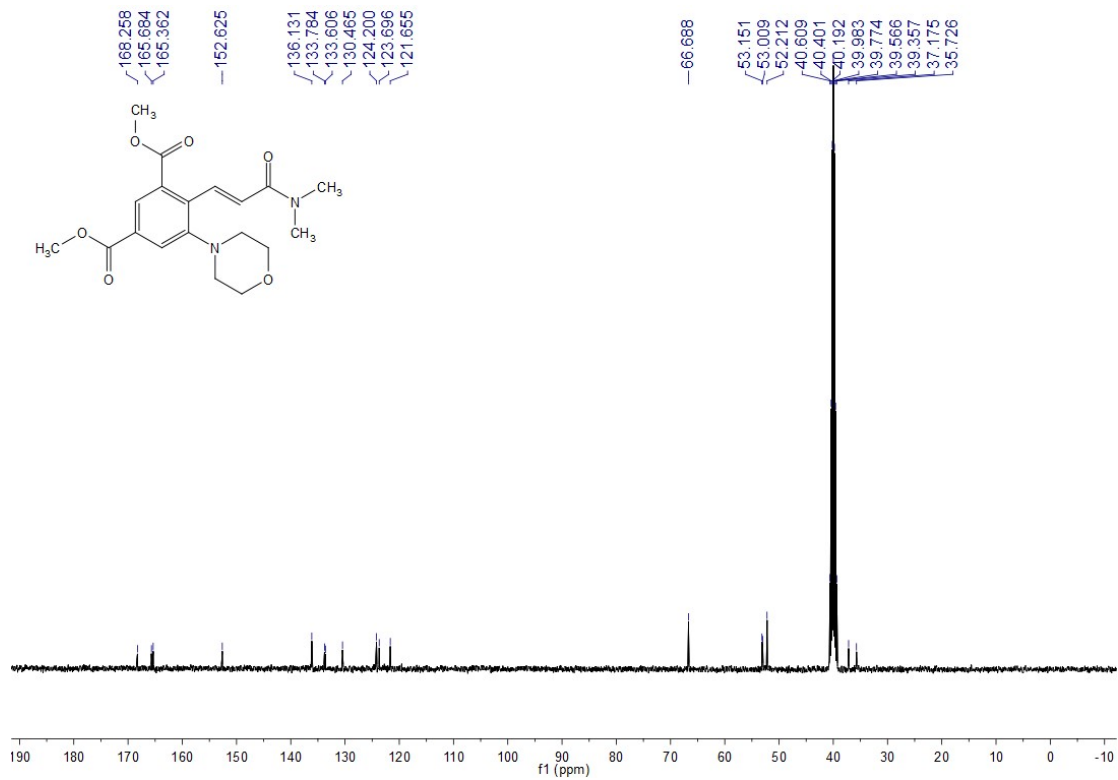



### <sup>1</sup>H NMR Spectrum of 4k

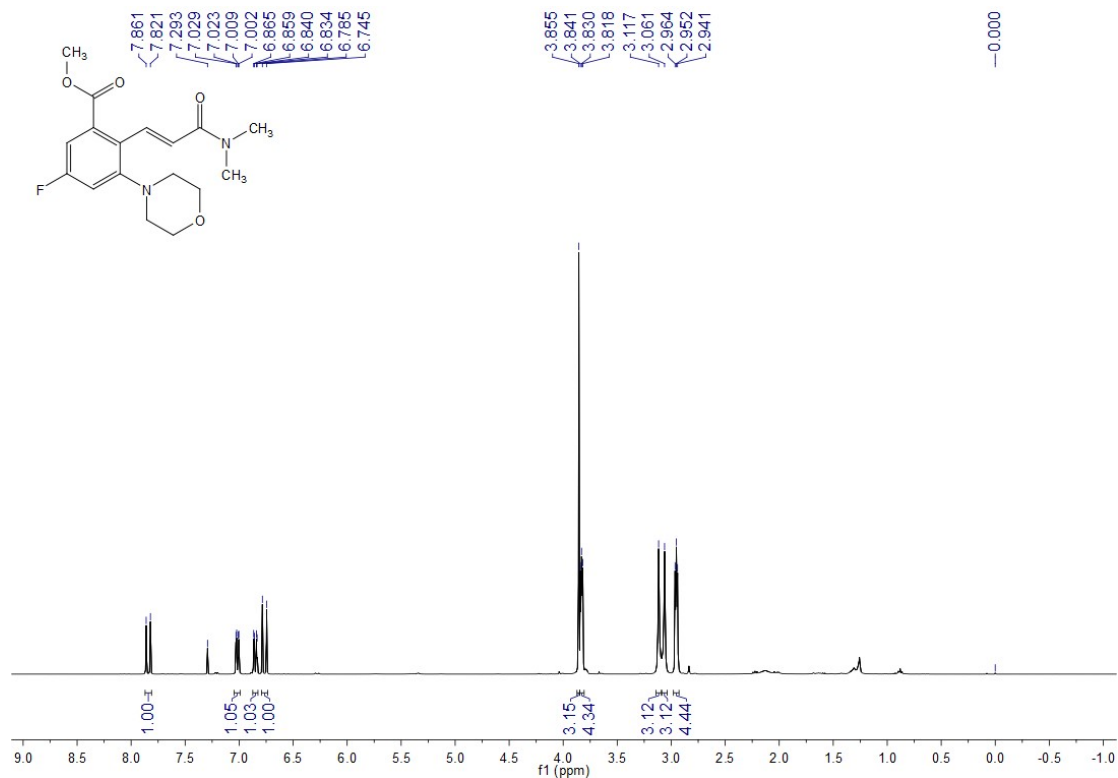

### <sup>13</sup>C NMR Spectrum of 4k

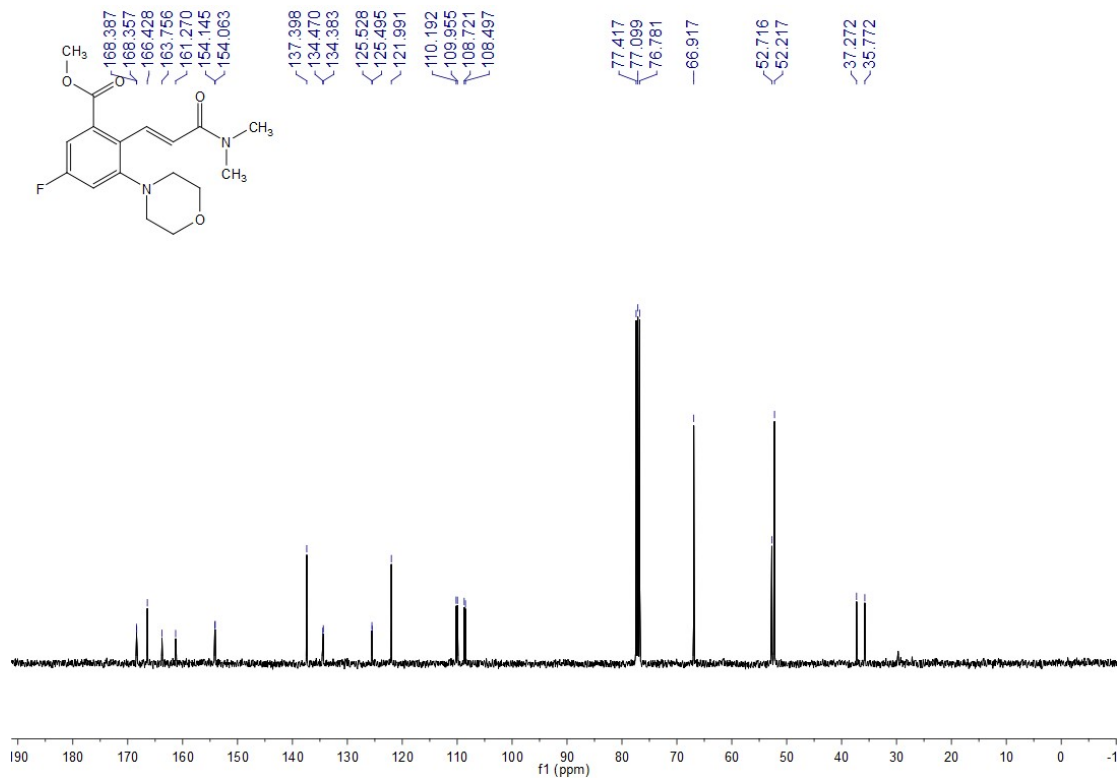

### <sup>1</sup>H NMR Spectrum of 4I

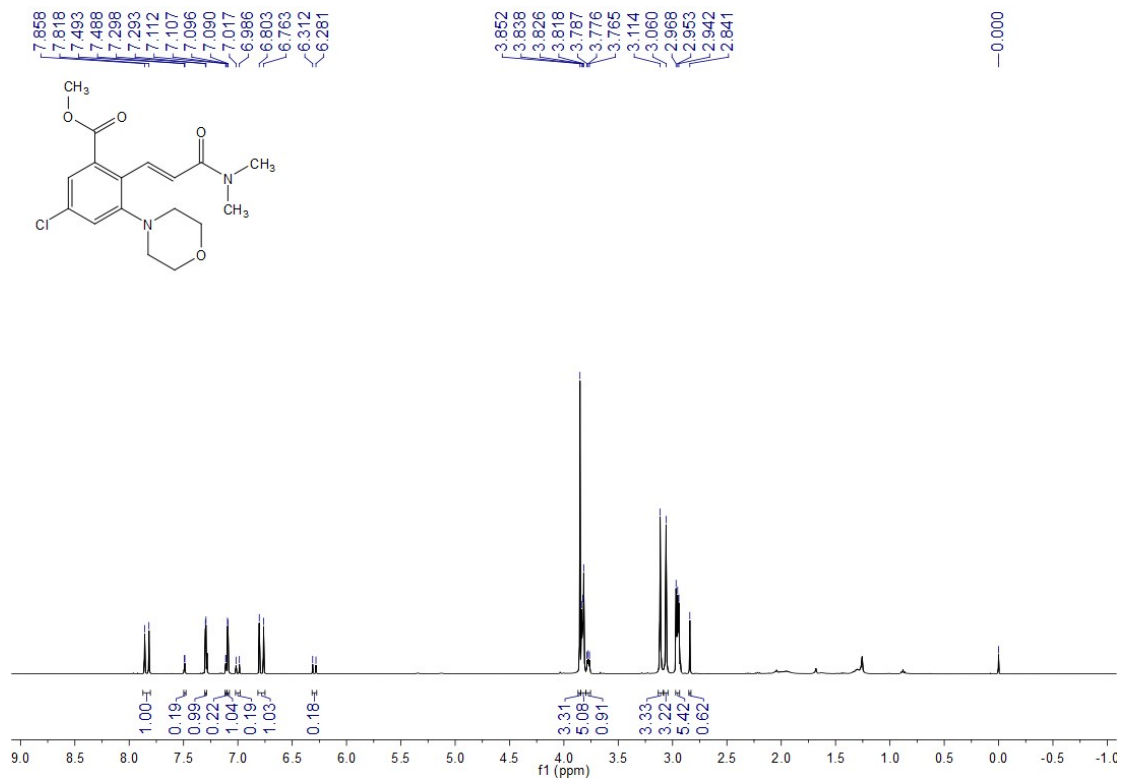

### <sup>13</sup>C NMR Spectrum of 4I

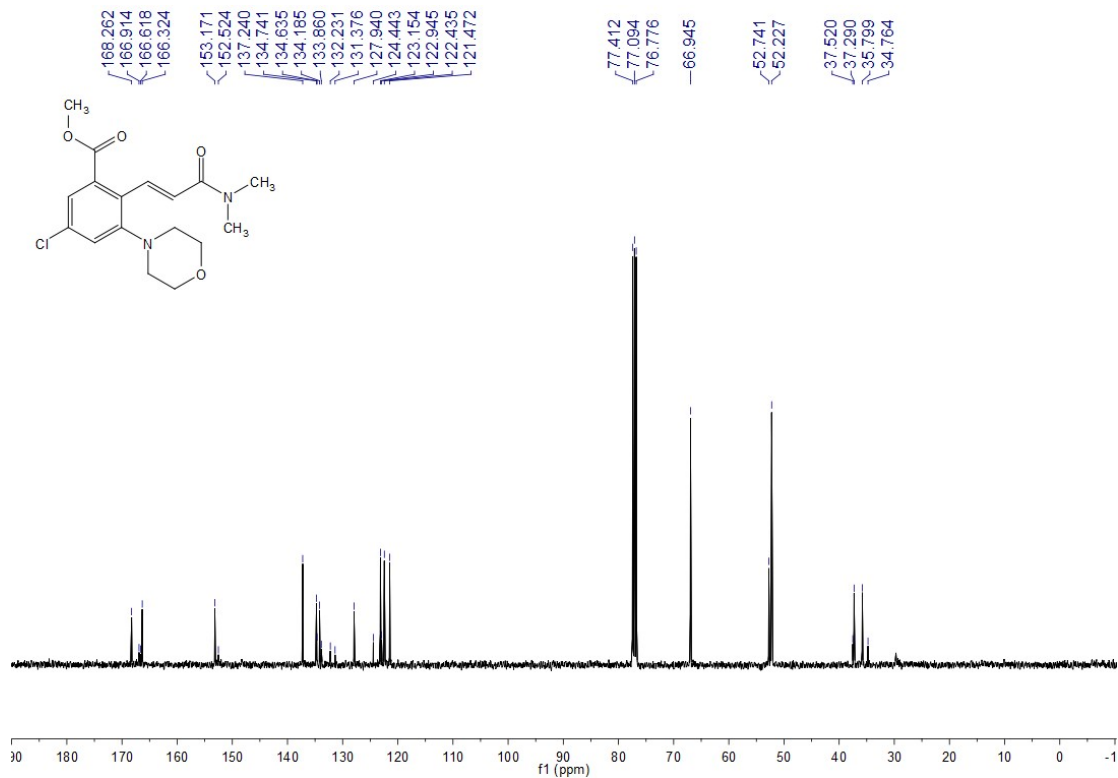

### <sup>1</sup>H NMR Spectrum of 4m

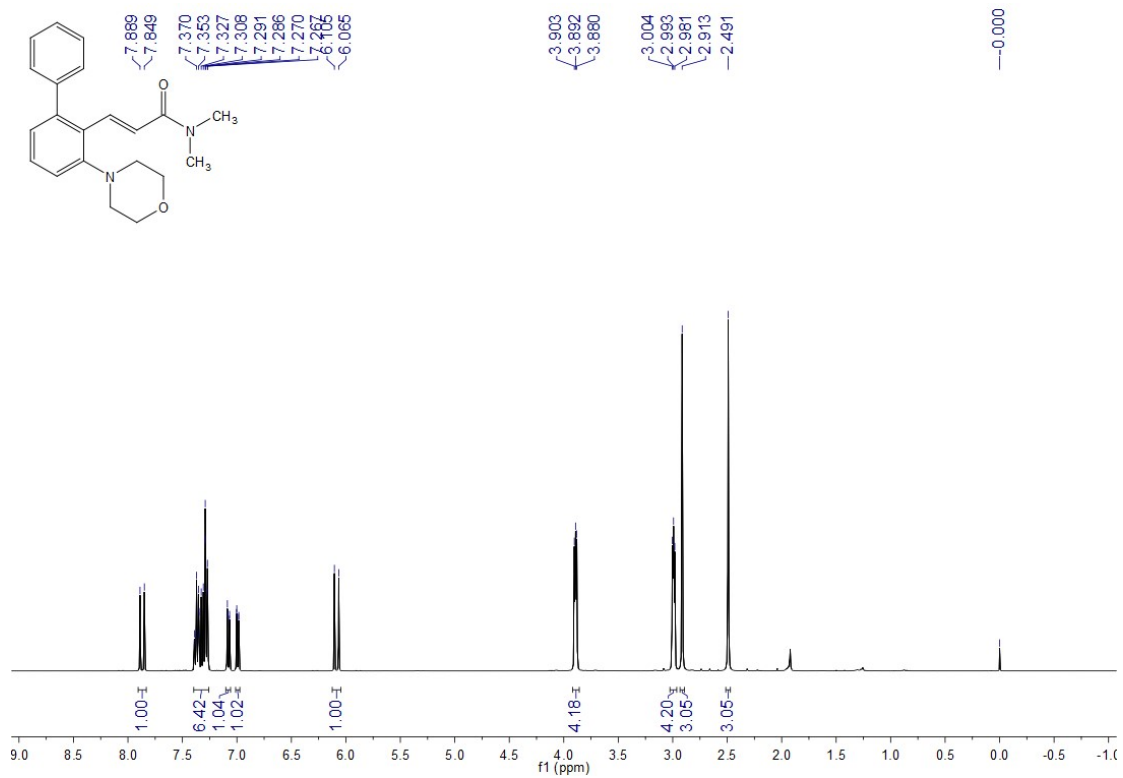

### <sup>13</sup>C NMR Spectrum of 4m

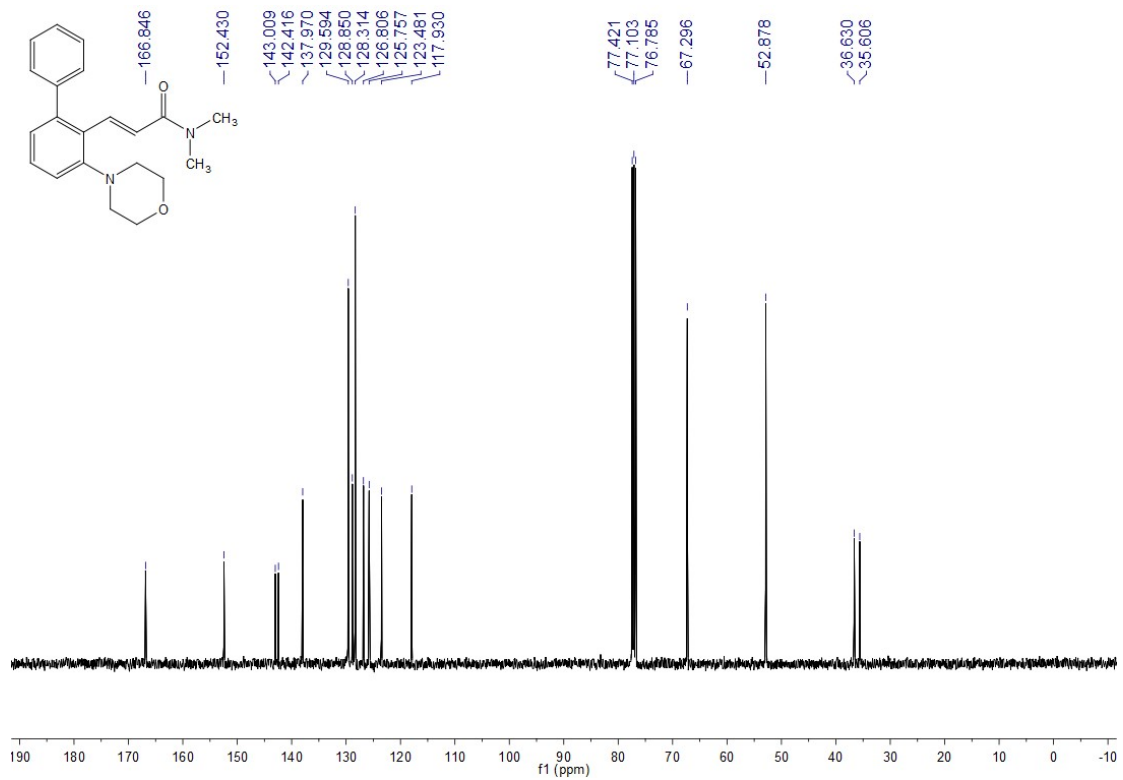

### <sup>1</sup>H NMR Spectrum of 4n

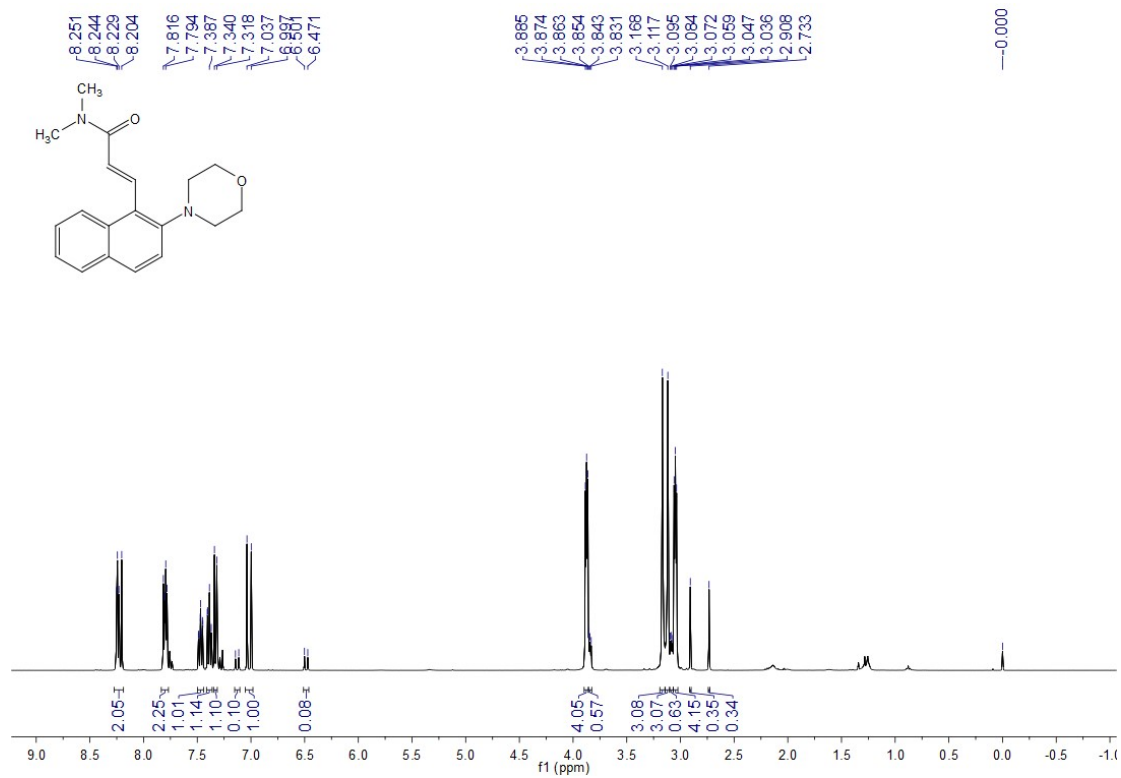

### <sup>13</sup>C NMR Spectrum of 4n

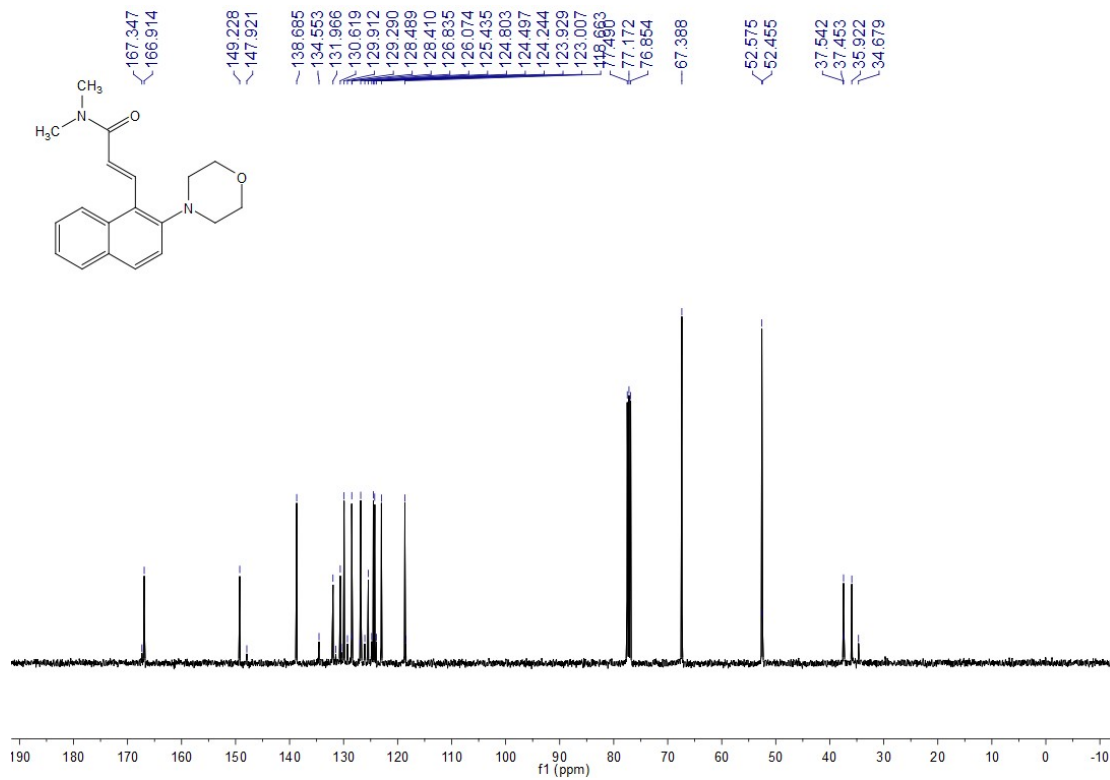

### <sup>1</sup>H NMR Spectrum of 4o

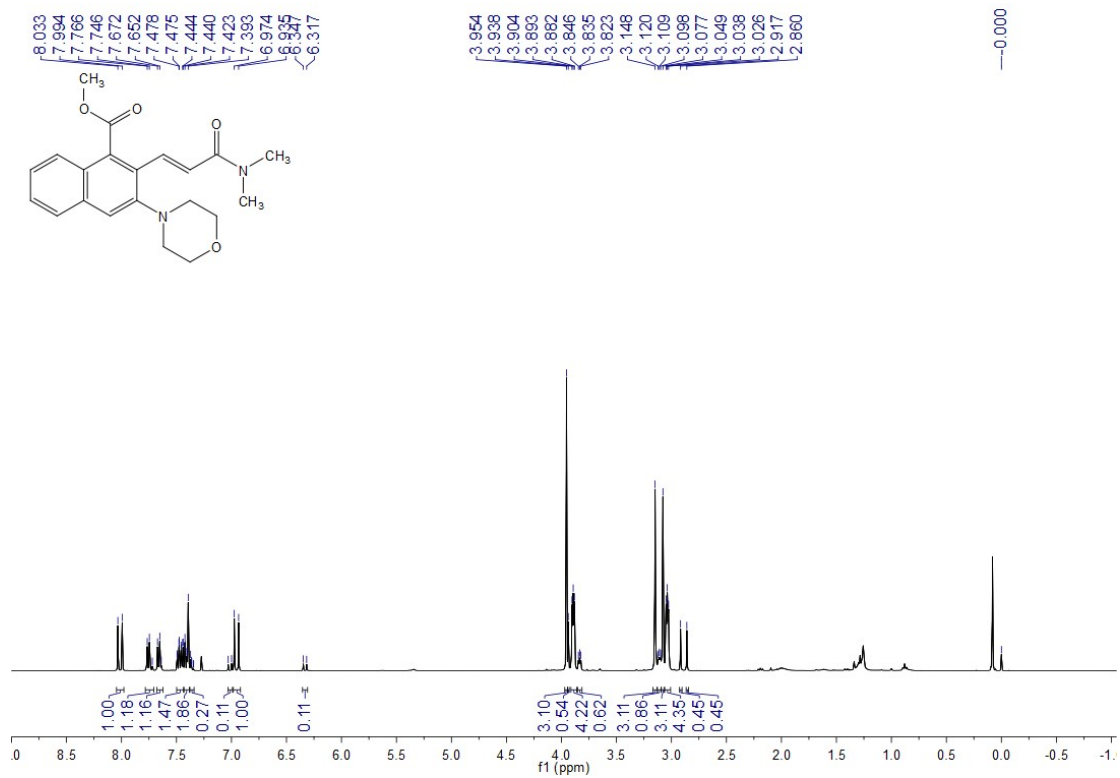

### <sup>13</sup>C NMR Spectrum of 4o

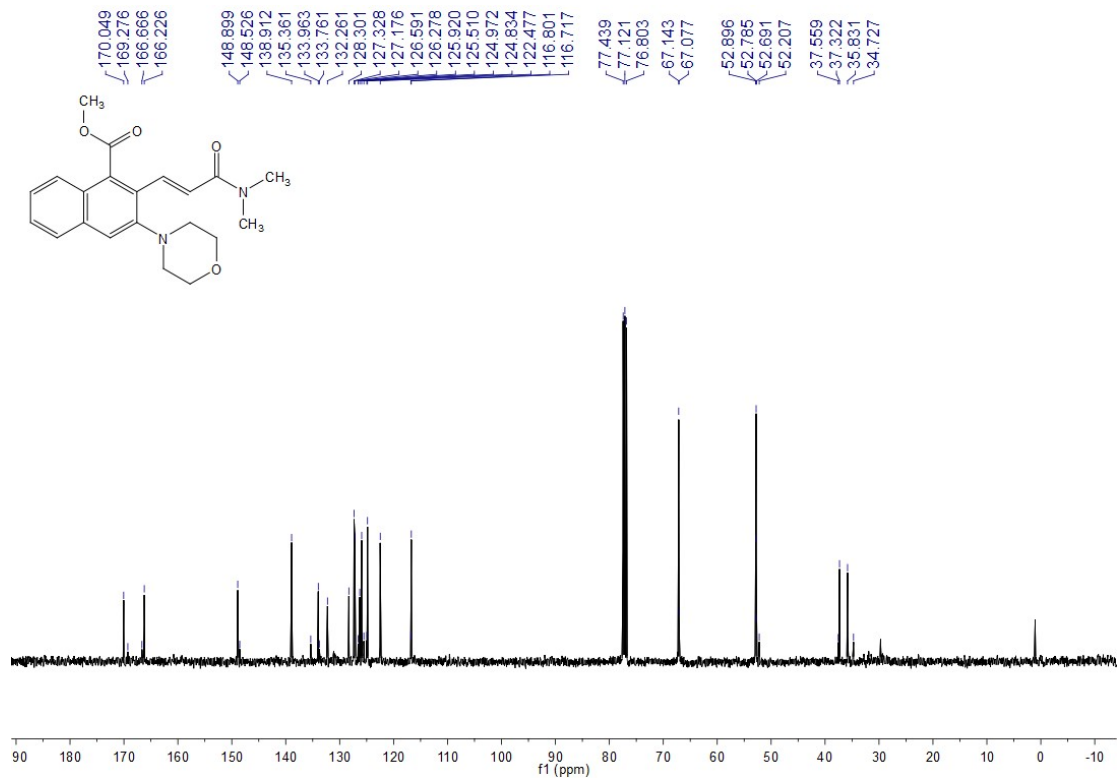

### <sup>1</sup>H NMR Spectrum of 4p

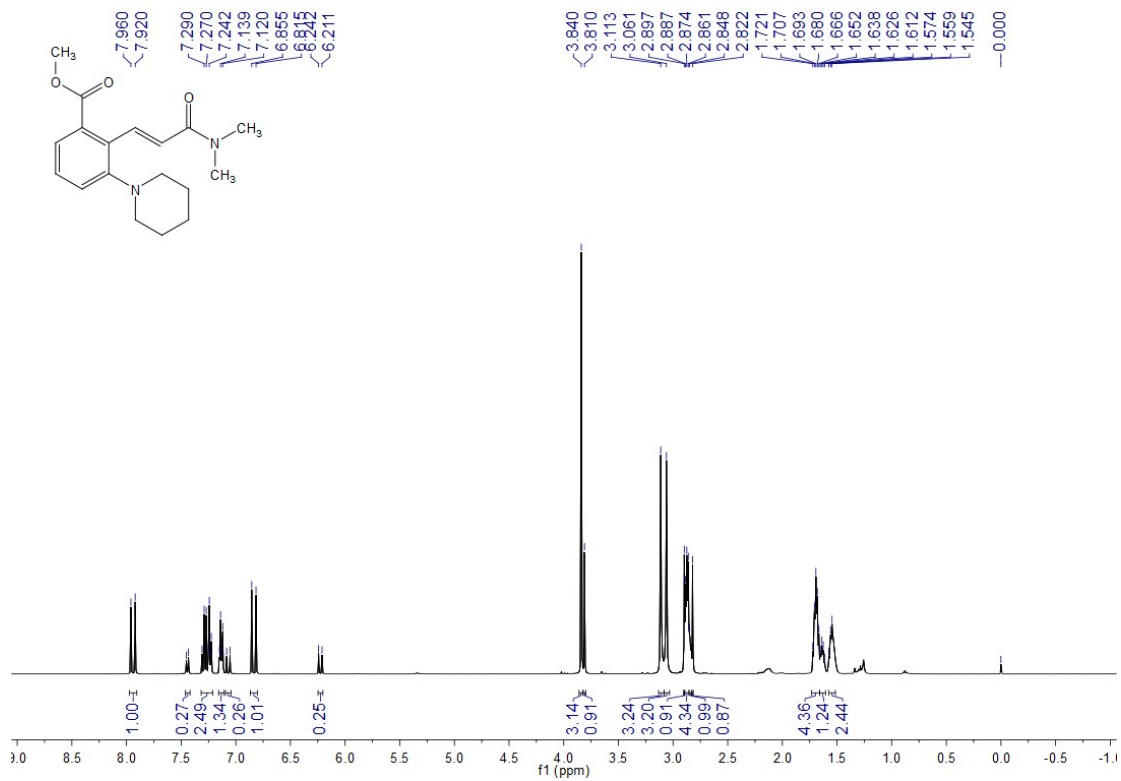

### <sup>13</sup>C NMR Spectrum of 4p

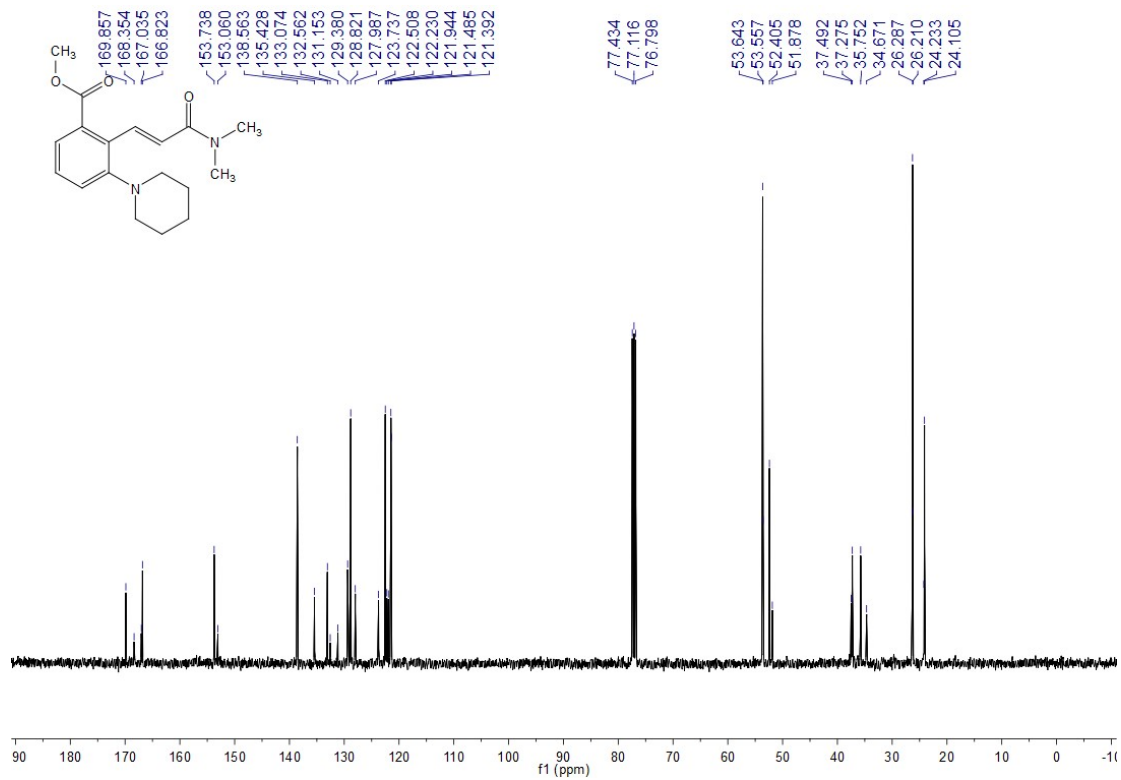

### <sup>1</sup>H NMR Spectrum of 4q

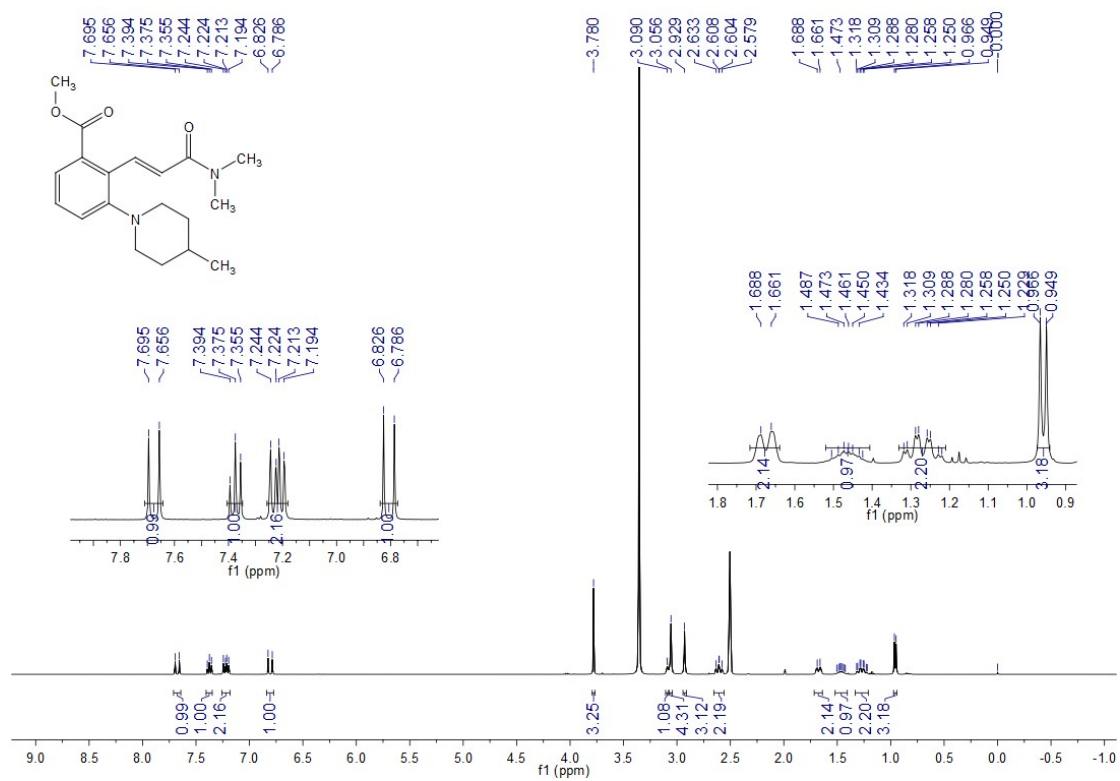

### <sup>13</sup>C NMR Spectrum of 4q

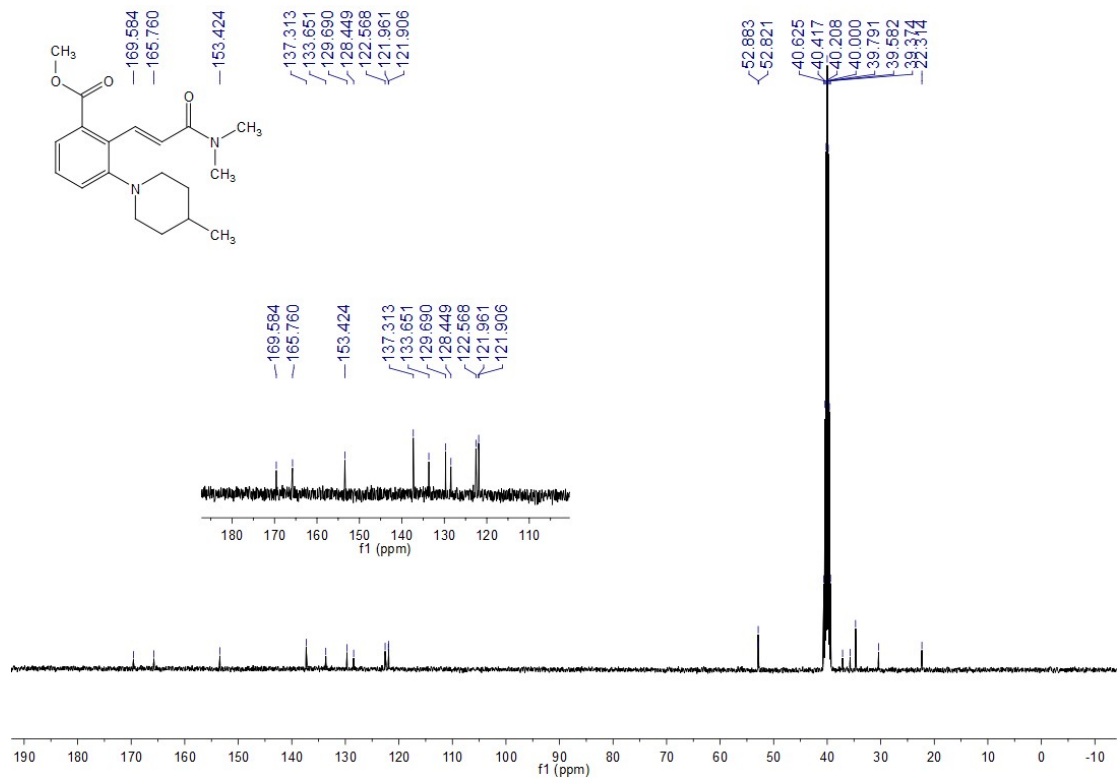

### <sup>1</sup>H NMR Spectrum of 4r

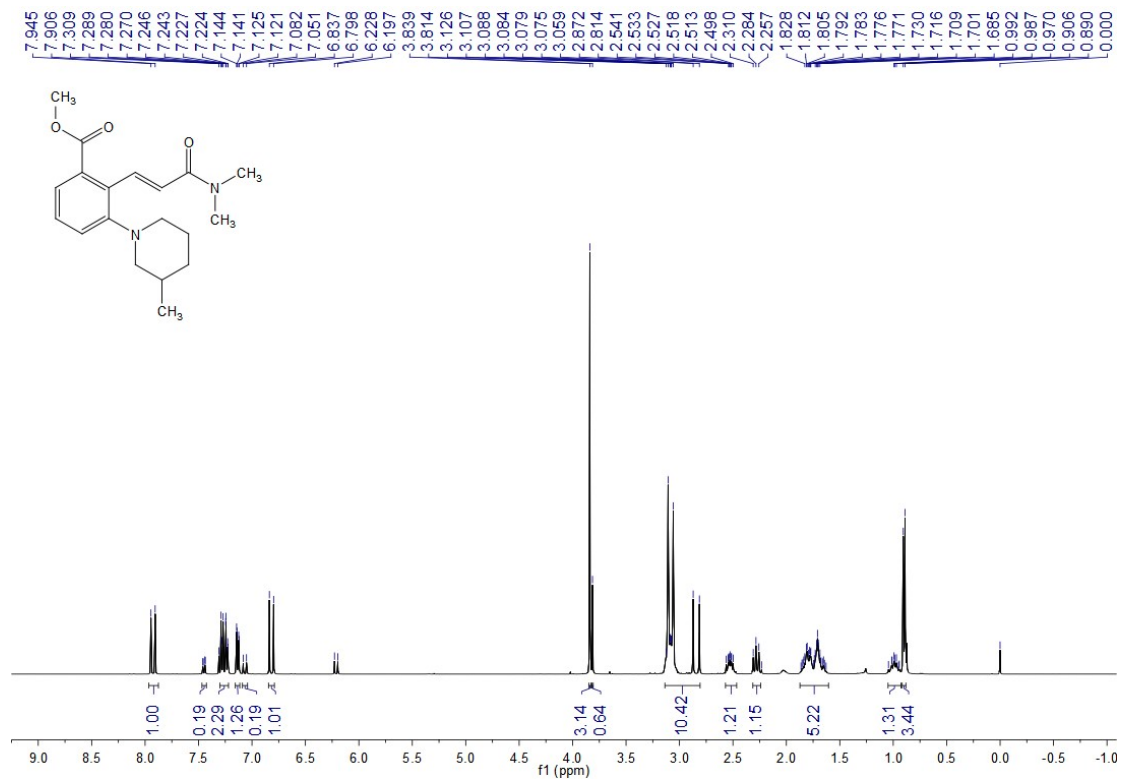

### <sup>13</sup>C NMR Spectrum of 4r

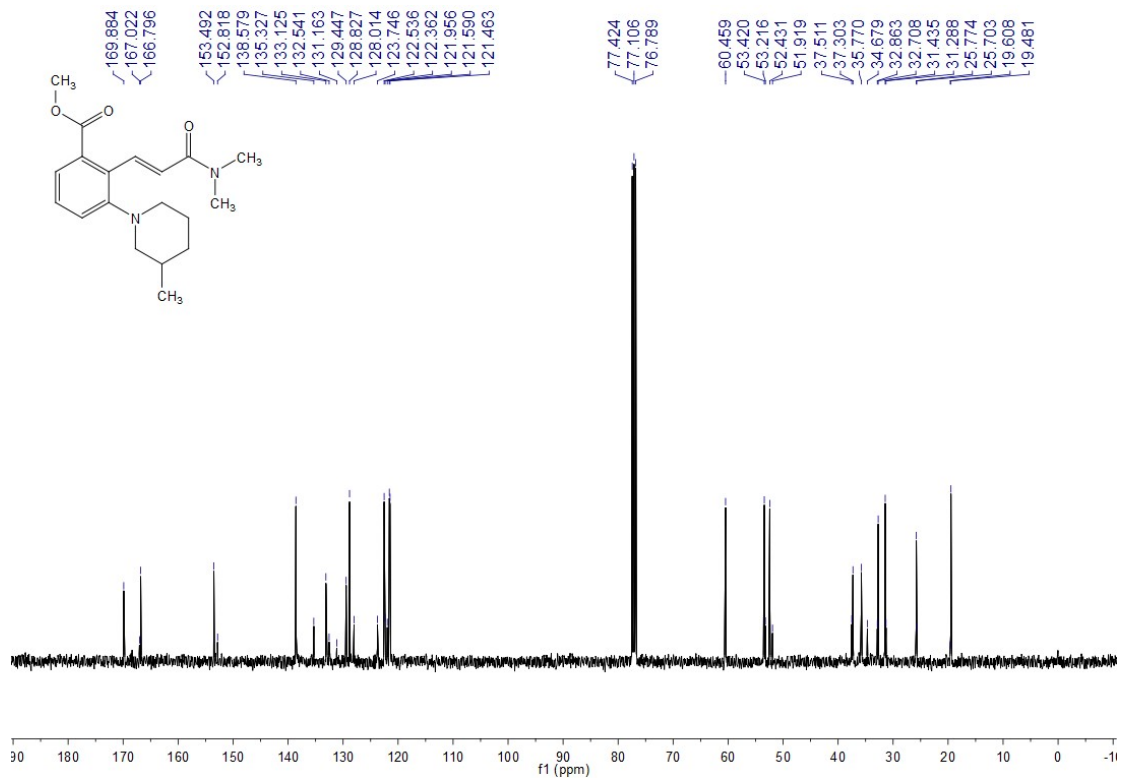



### <sup>1</sup>H NMR Spectrum of 4s

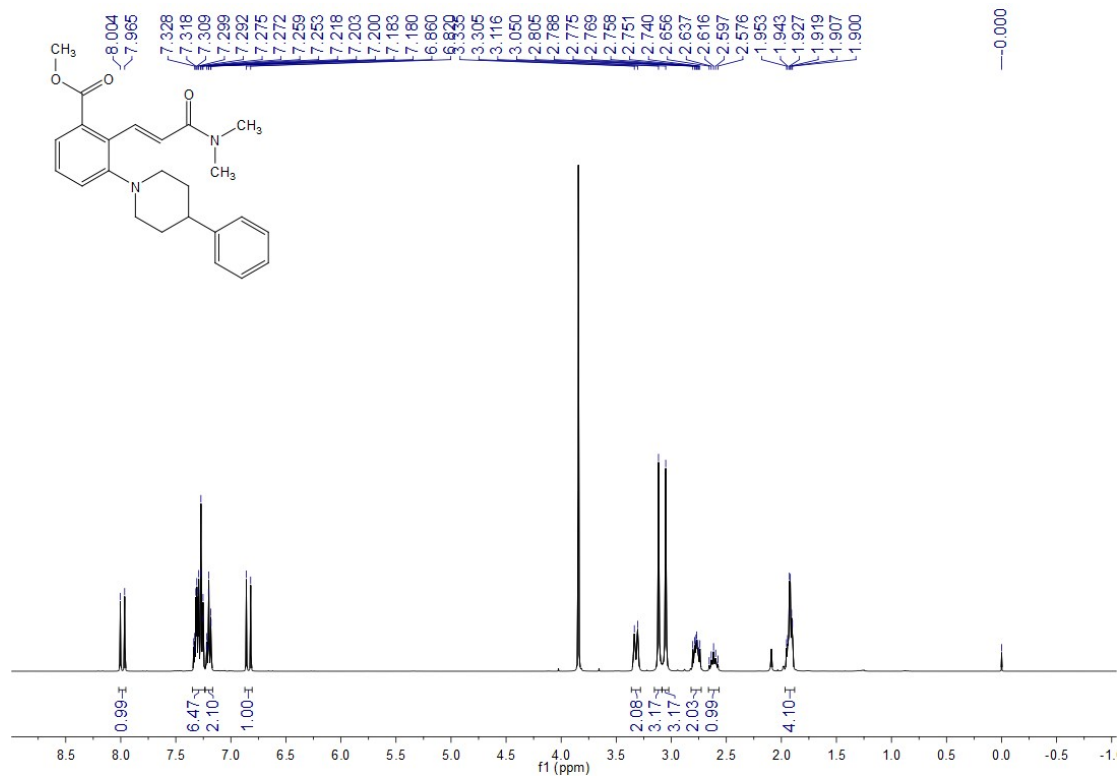

### <sup>13</sup>C NMR Spectrum of 4s

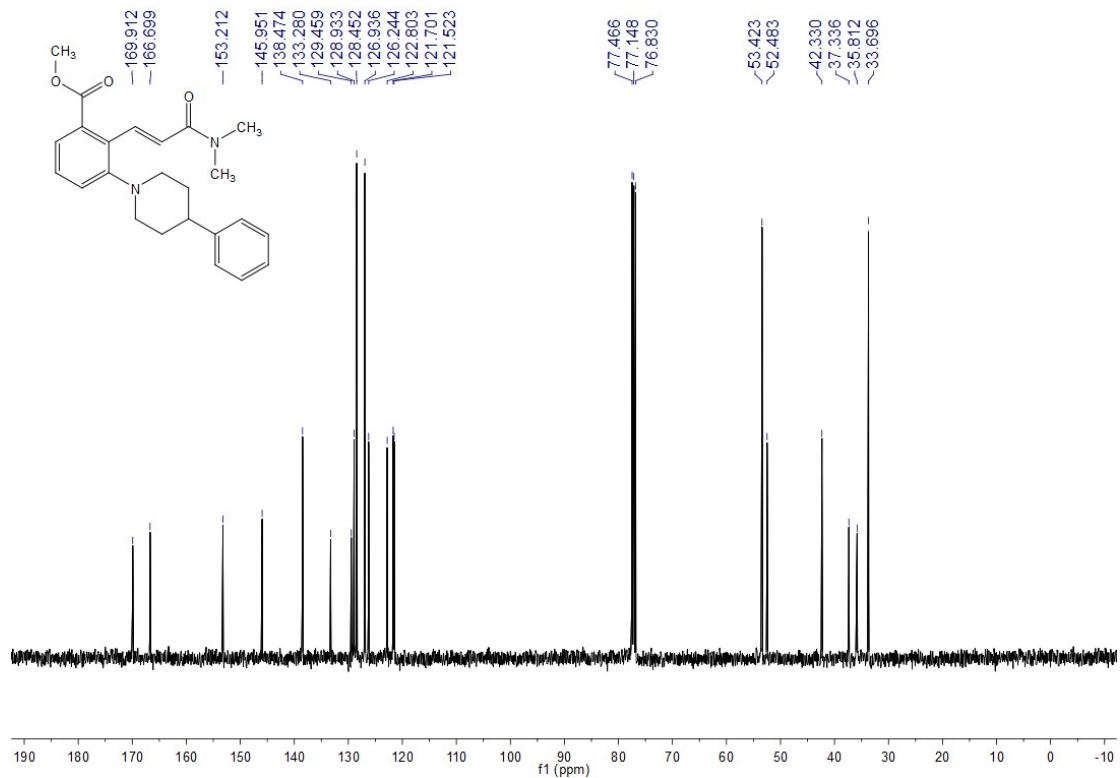

### <sup>1</sup>H NMR Spectrum of 4t

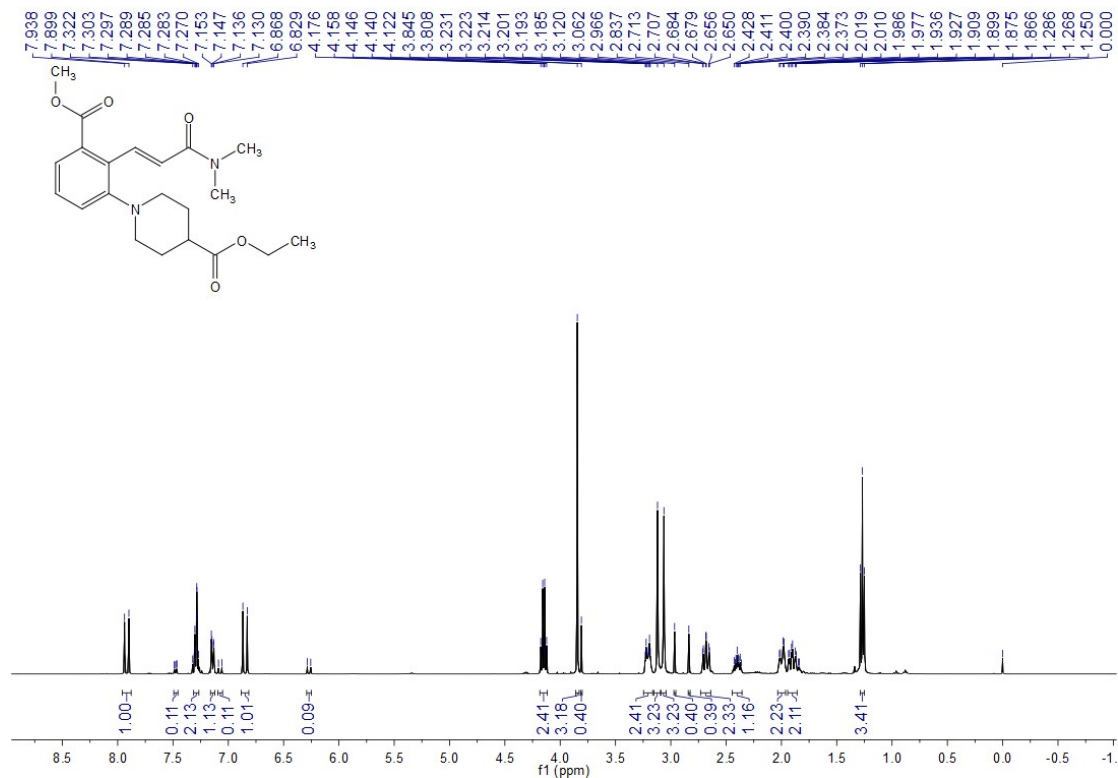

### <sup>13</sup>C NMR Spectrum of 4t

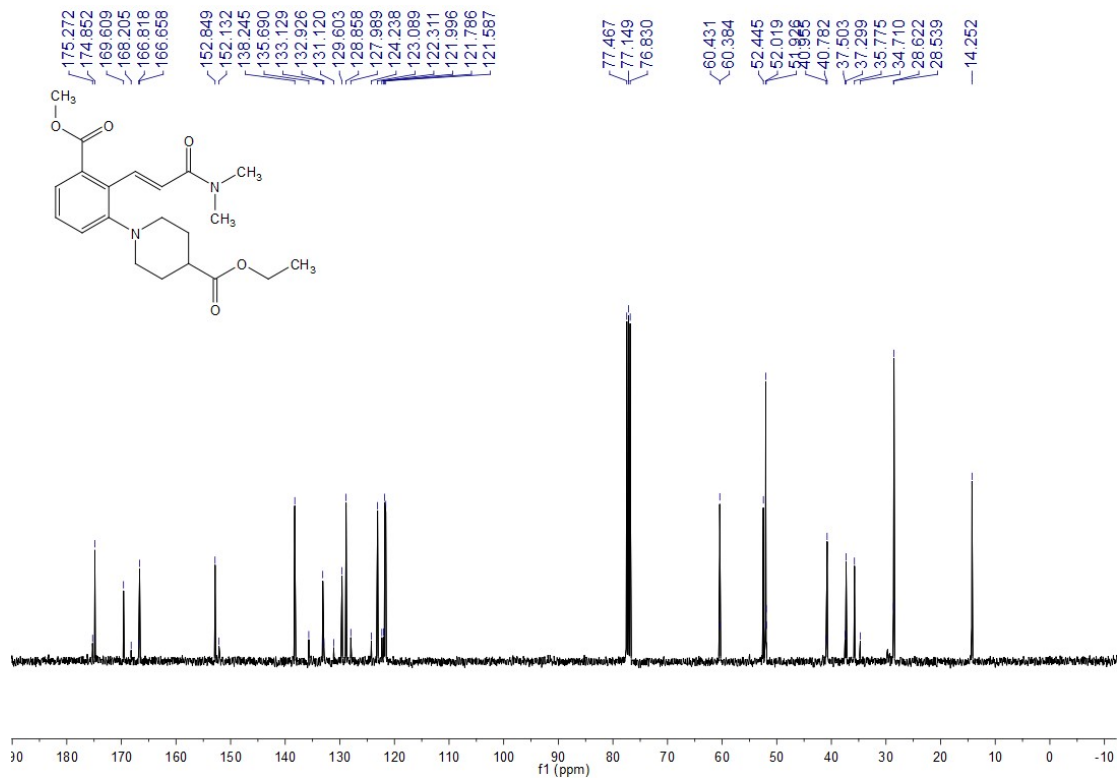

### <sup>1</sup>H NMR Spectrum of 4u

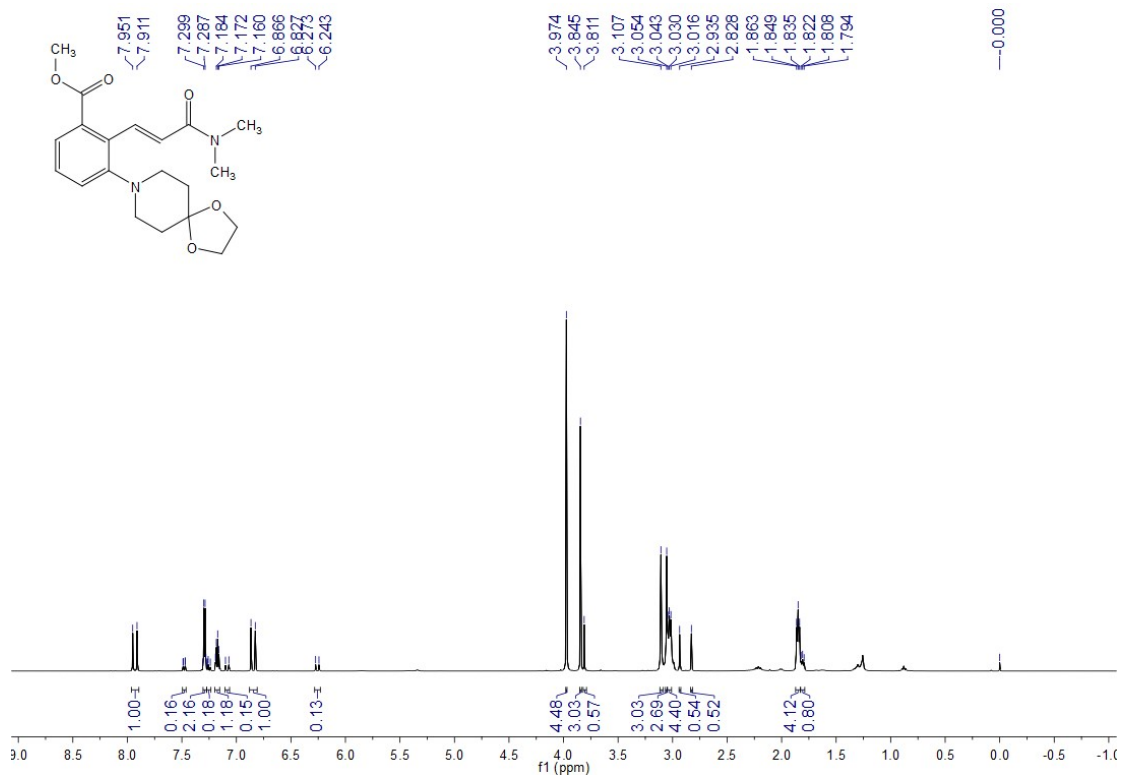

### <sup>13</sup>C NMR Spectrum of 4u

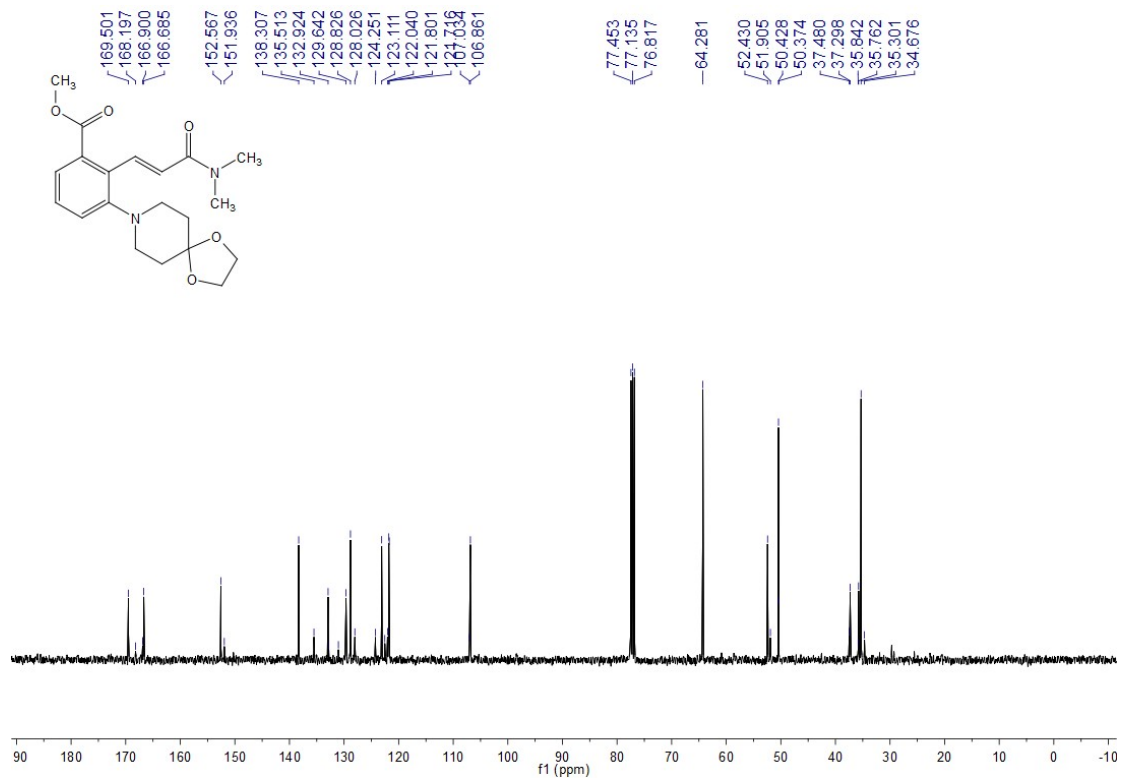

### <sup>1</sup>H NMR Spectrum of 4v

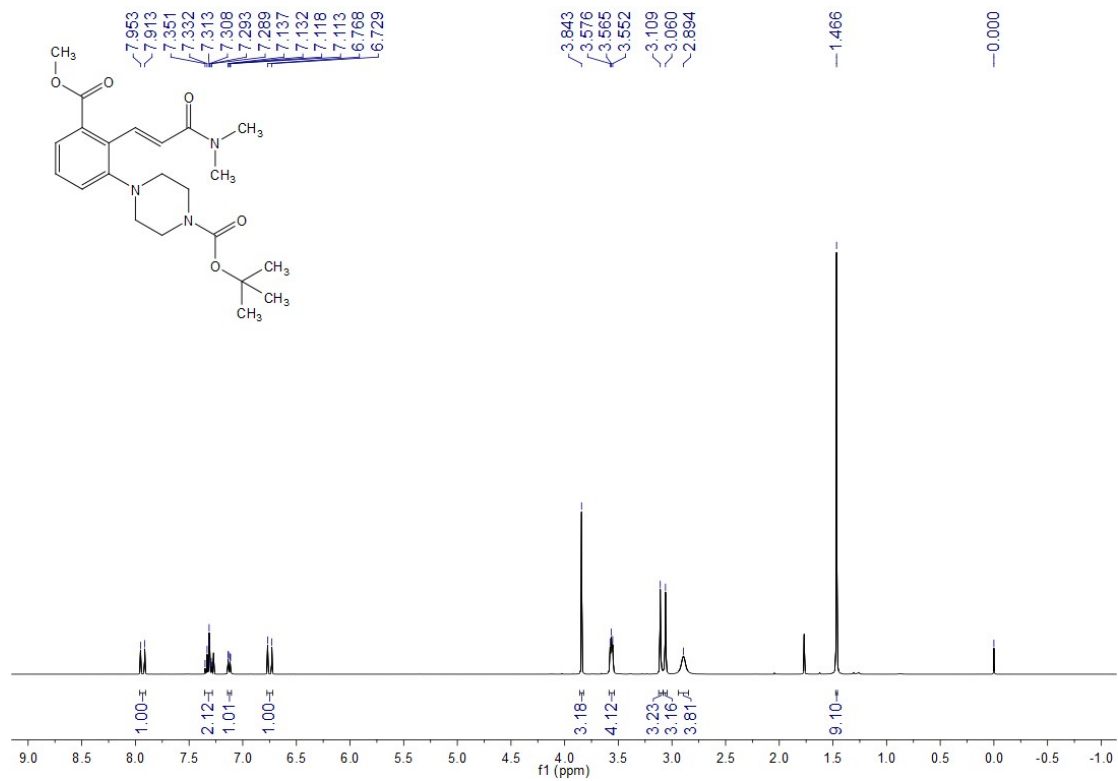

### <sup>13</sup>C NMR Spectrum of 4v

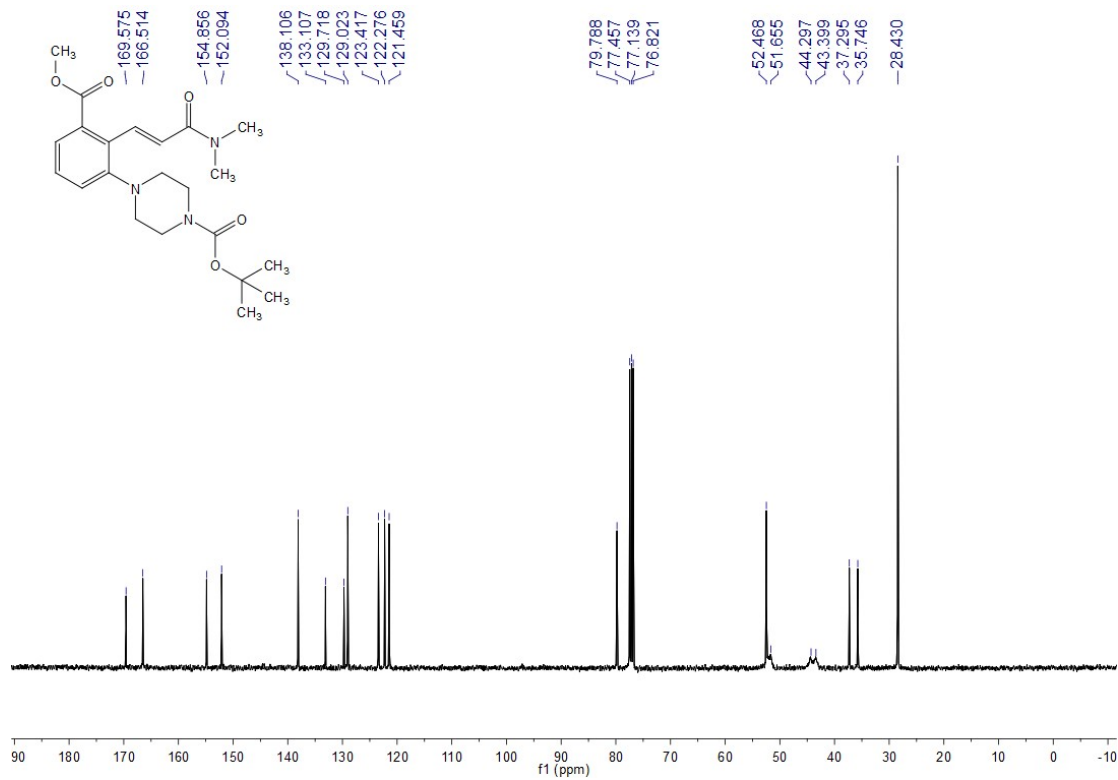

<sup>1</sup>H NMR Spectrum of **4w**

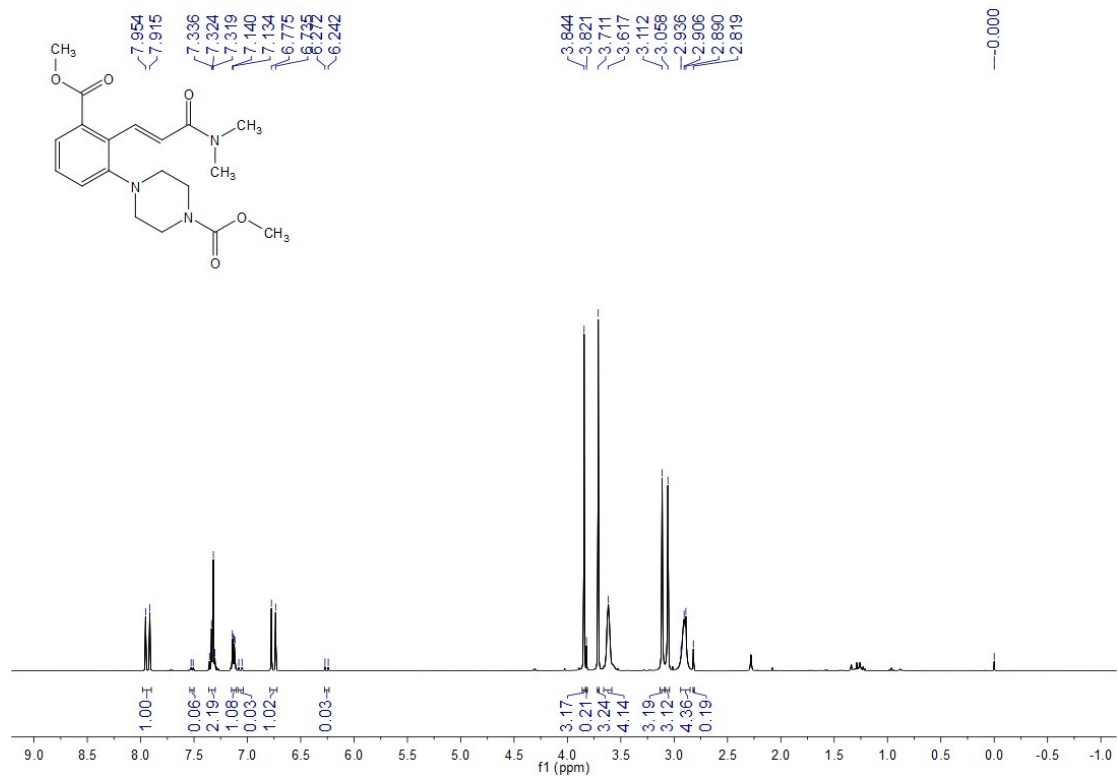

<sup>13</sup>C NMR Spectrum of **4w**

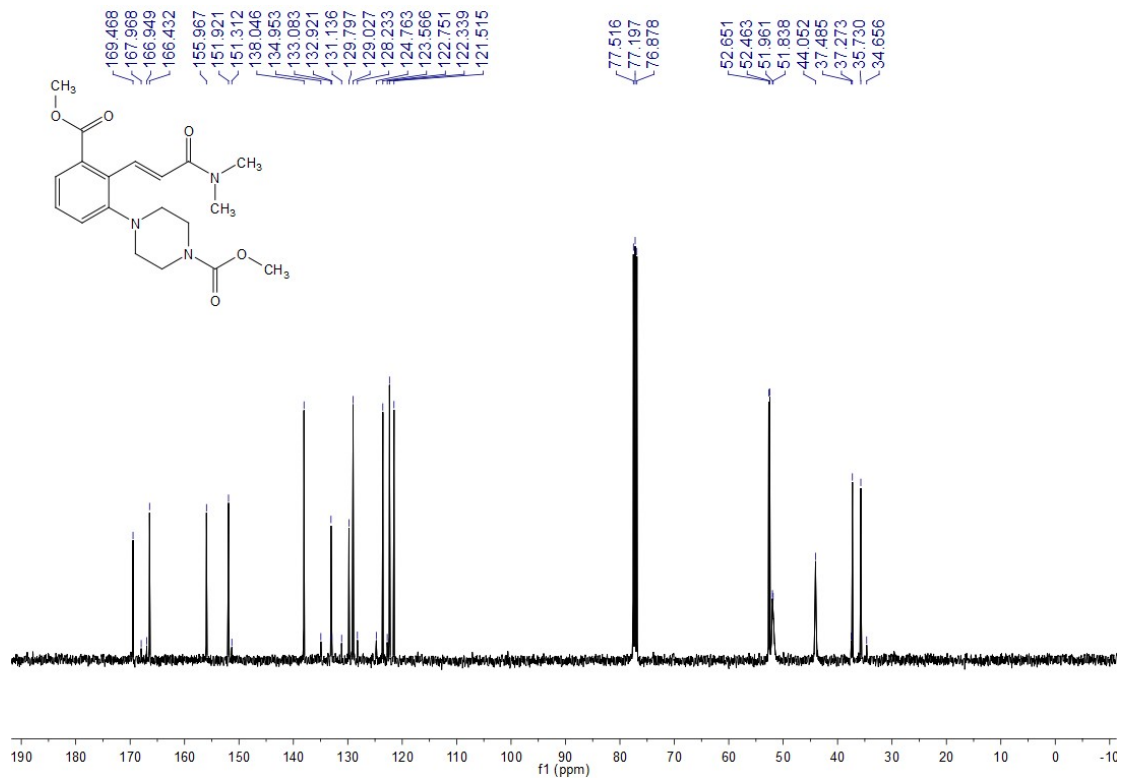

### <sup>1</sup>H NMR Spectrum of 4x

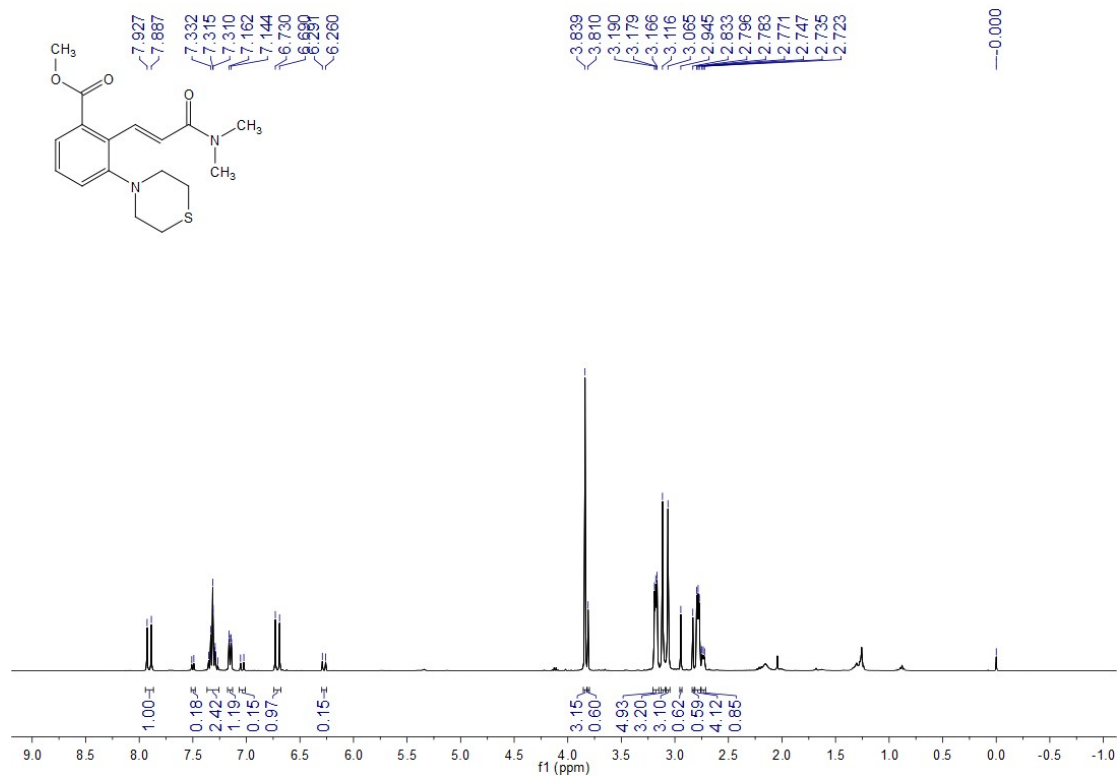

### <sup>13</sup>C NMR Spectrum of 4x

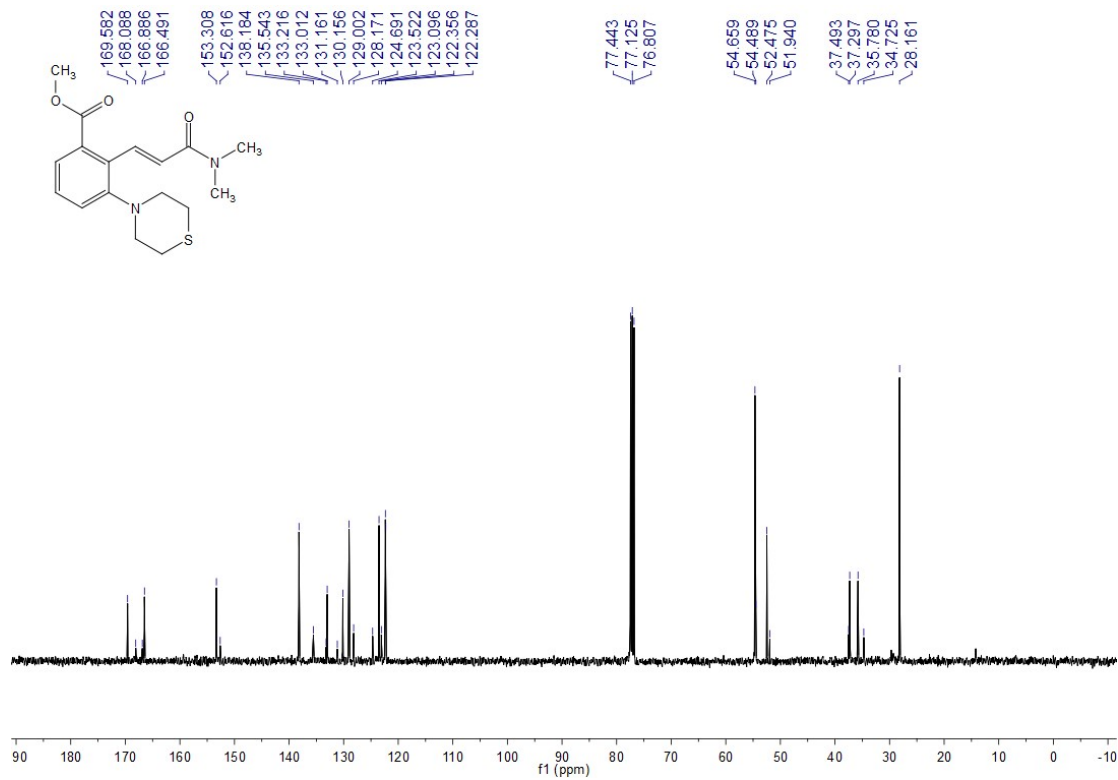

### <sup>1</sup>H NMR Spectrum of 4y

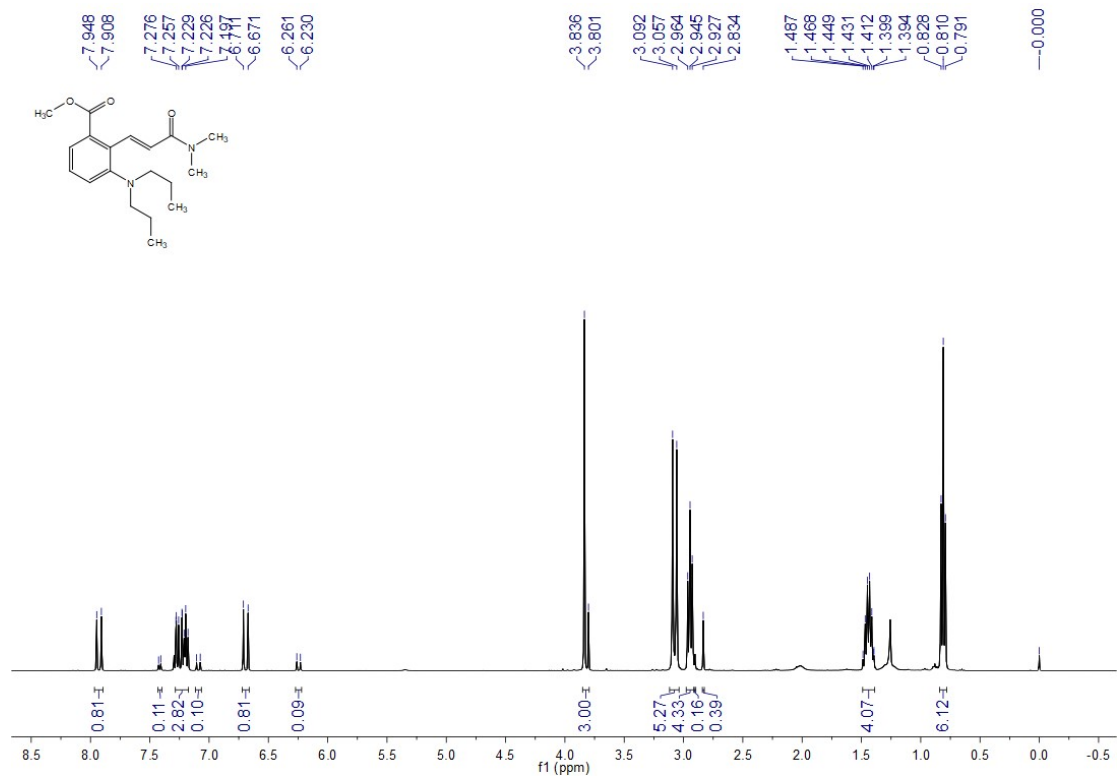

### <sup>13</sup>C NMR Spectrum of 4y

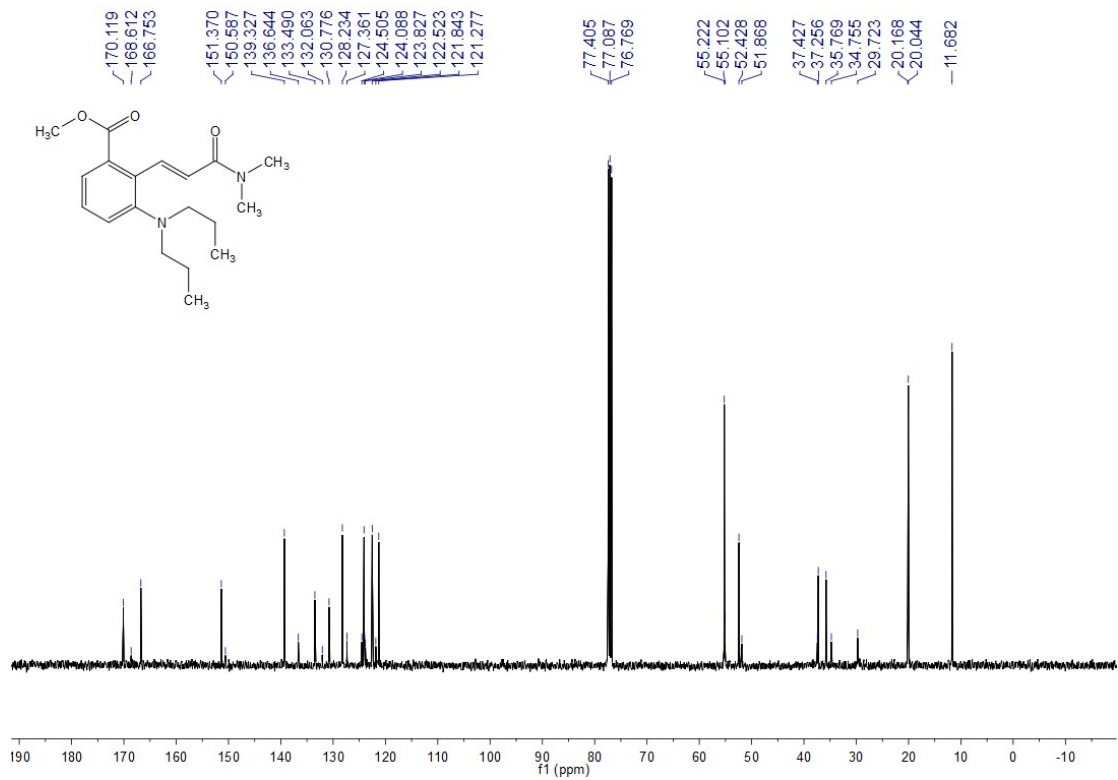

### <sup>1</sup>H NMR Spectrum of 4z

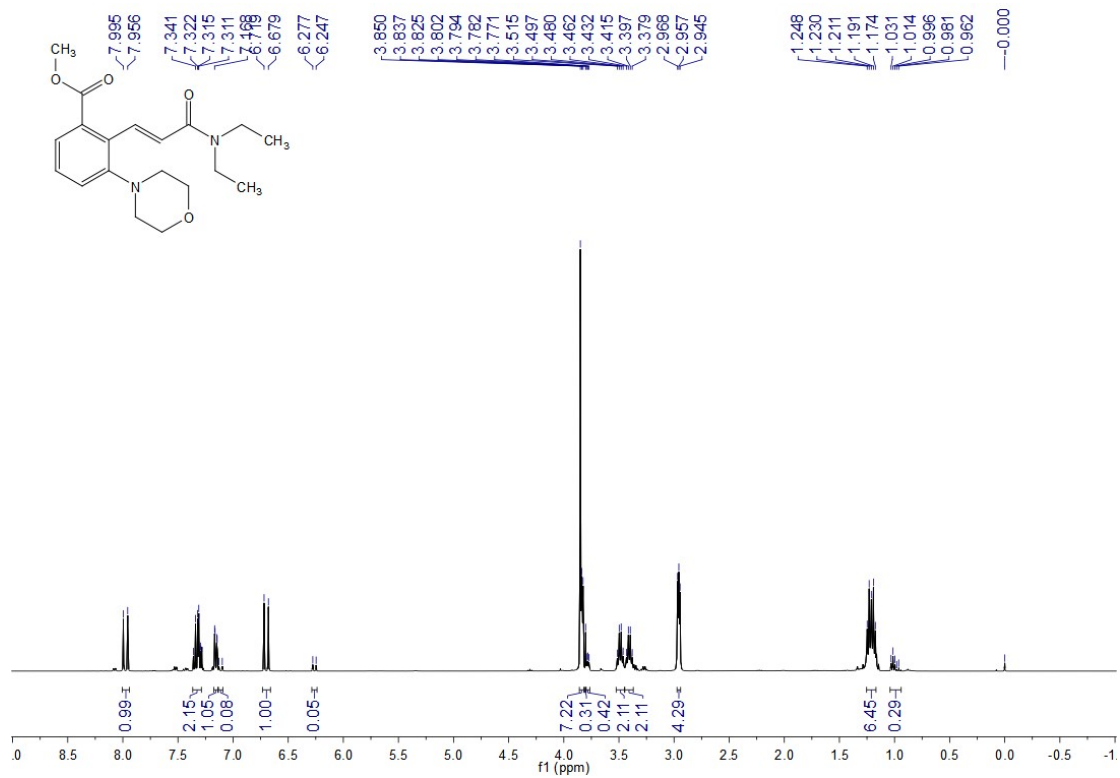

### <sup>13</sup>C NMR Spectrum of 4z

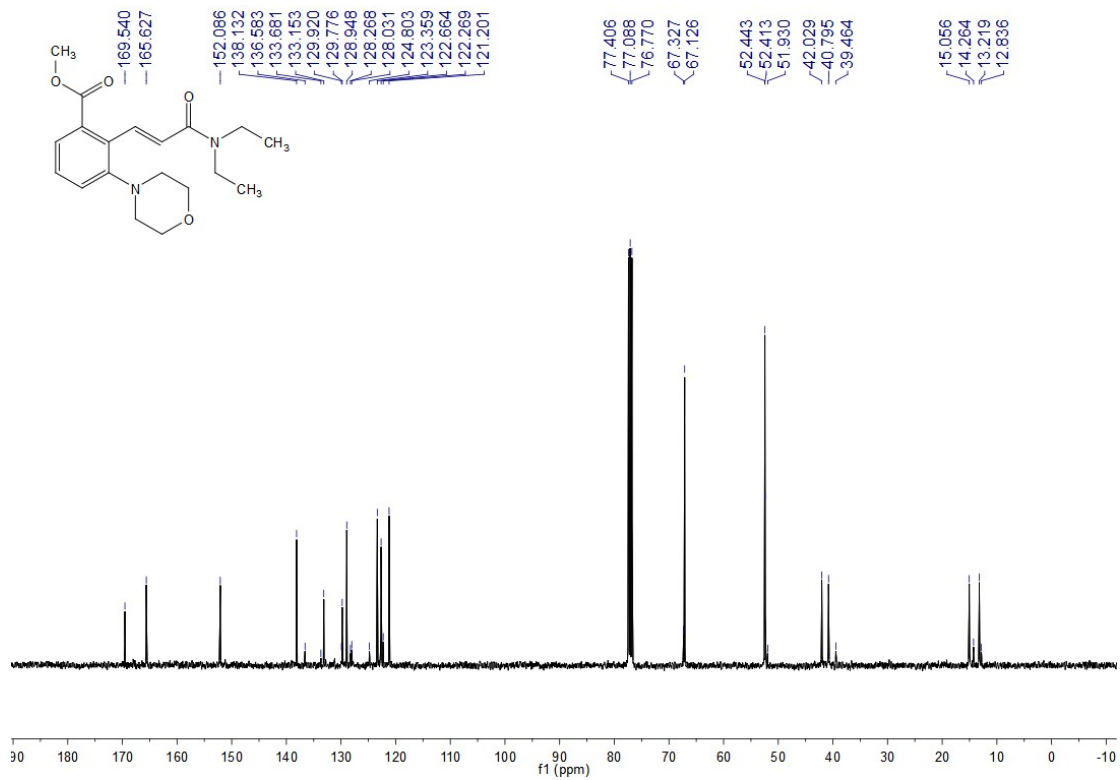



### <sup>1</sup>H NMR Spectrum of 4aa

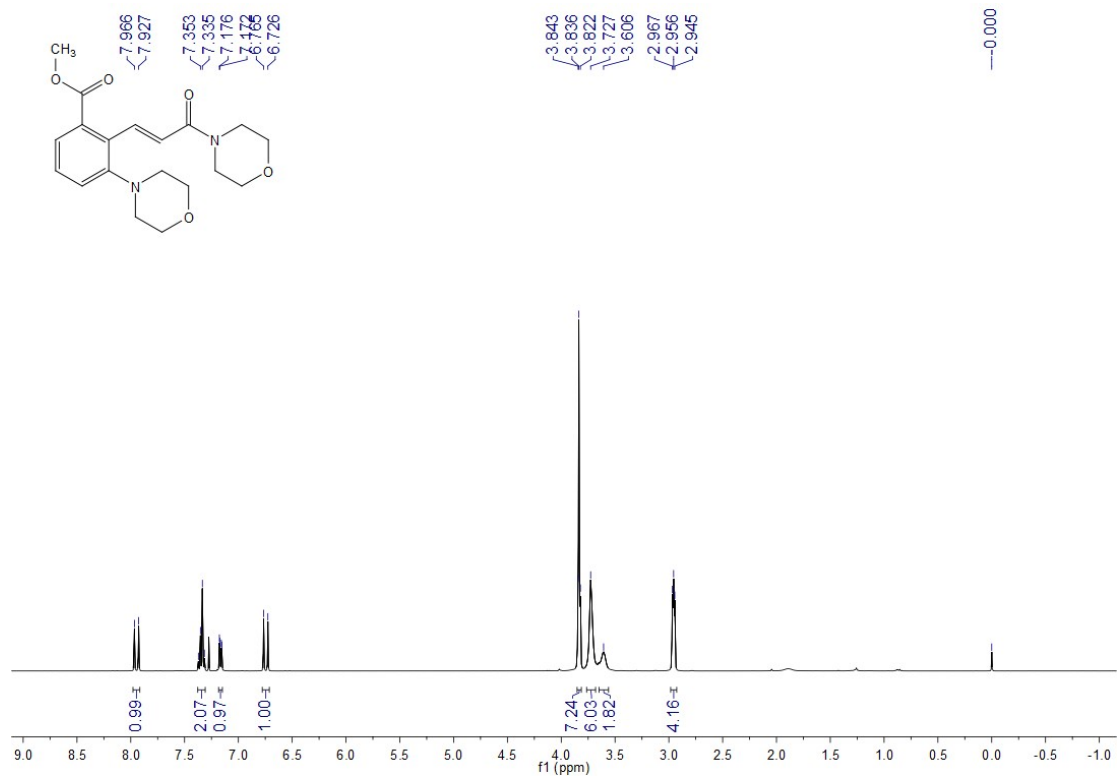

### <sup>13</sup>C NMR Spectrum of 4aa

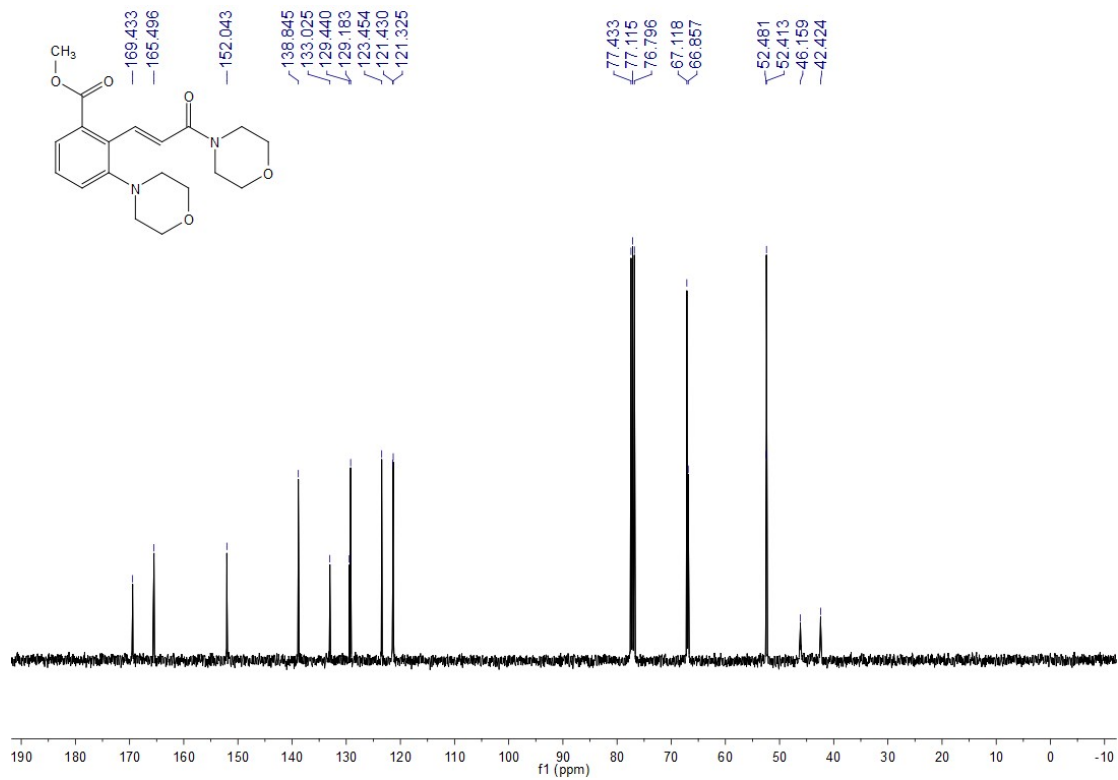

### <sup>1</sup>H NMR Spectrum of 4ab

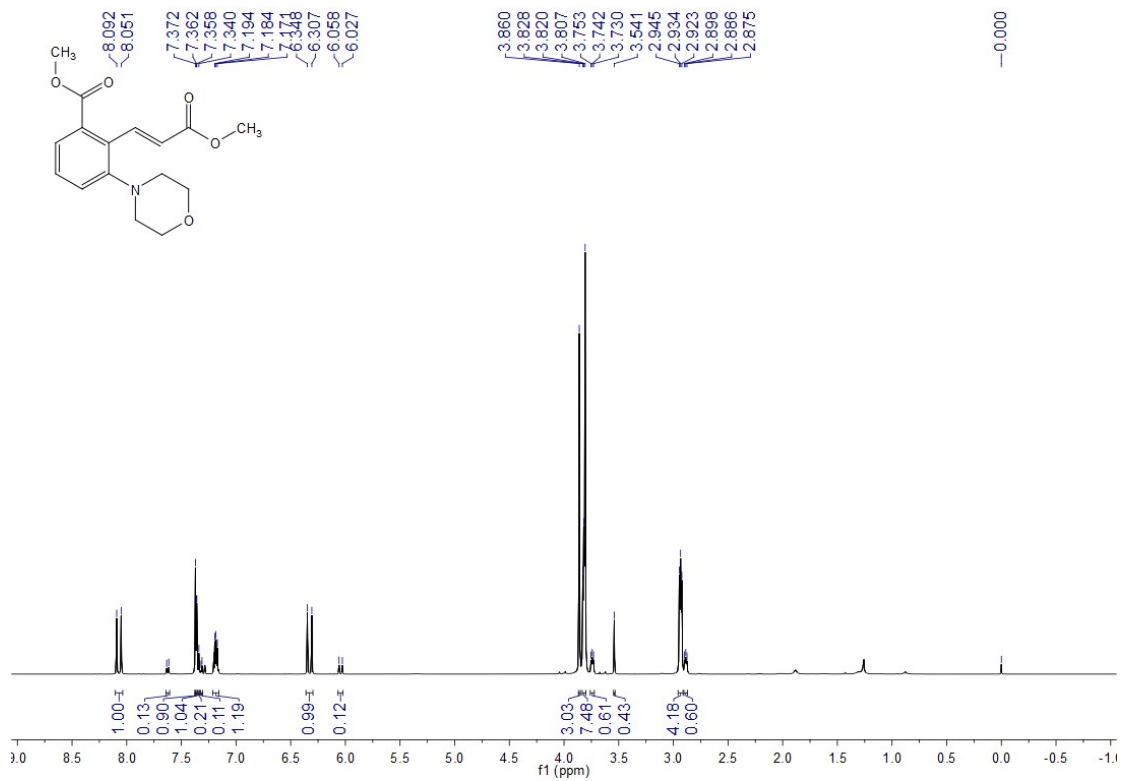

### <sup>13</sup>C NMR Spectrum of 4ab

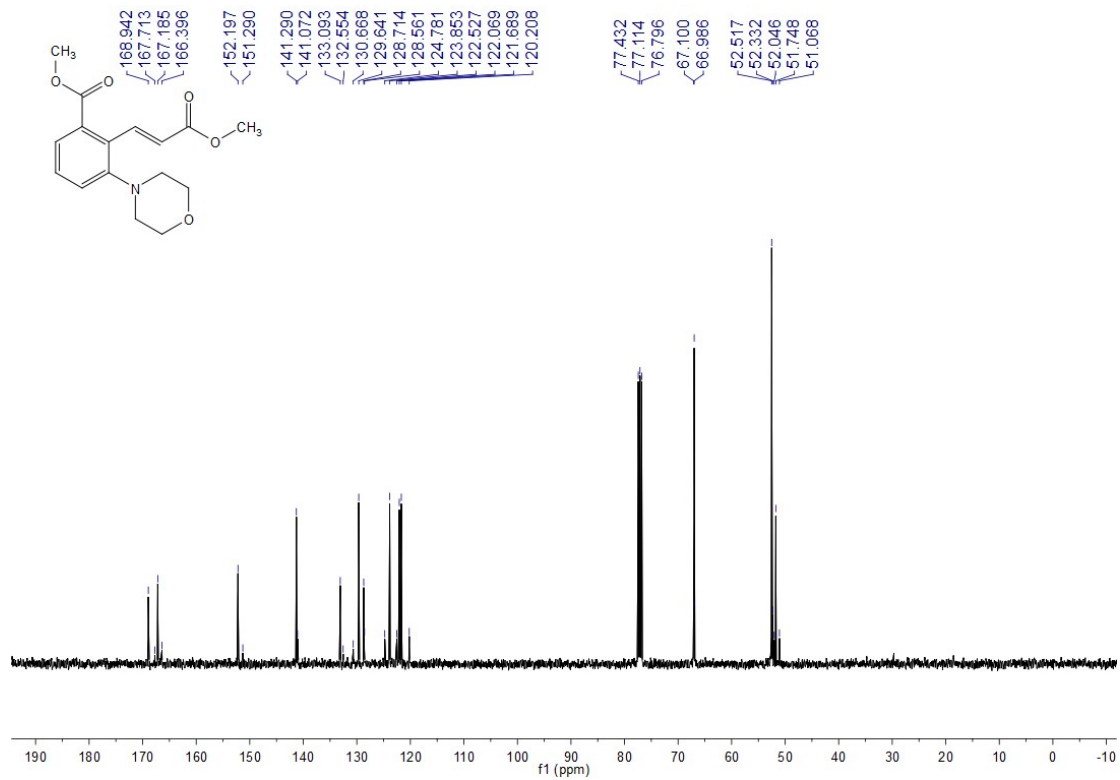

### <sup>1</sup>H NMR Spectrum of 4ac

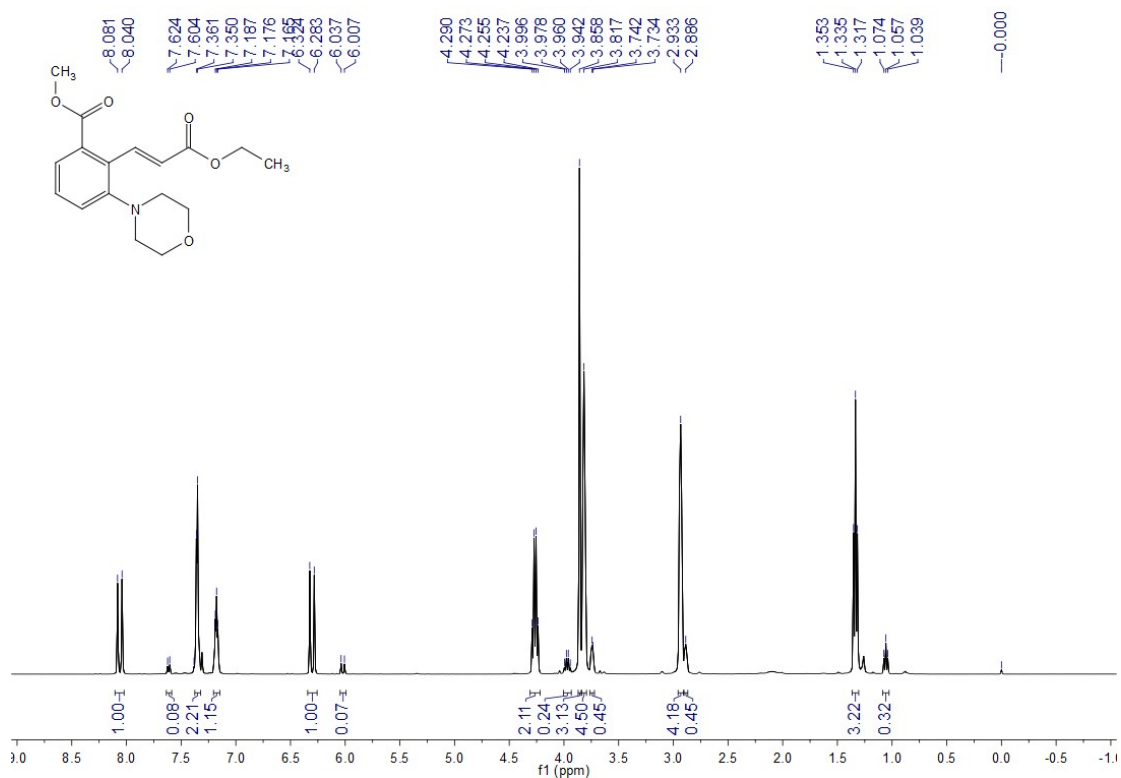

### <sup>13</sup>C NMR Spectrum of 4ac

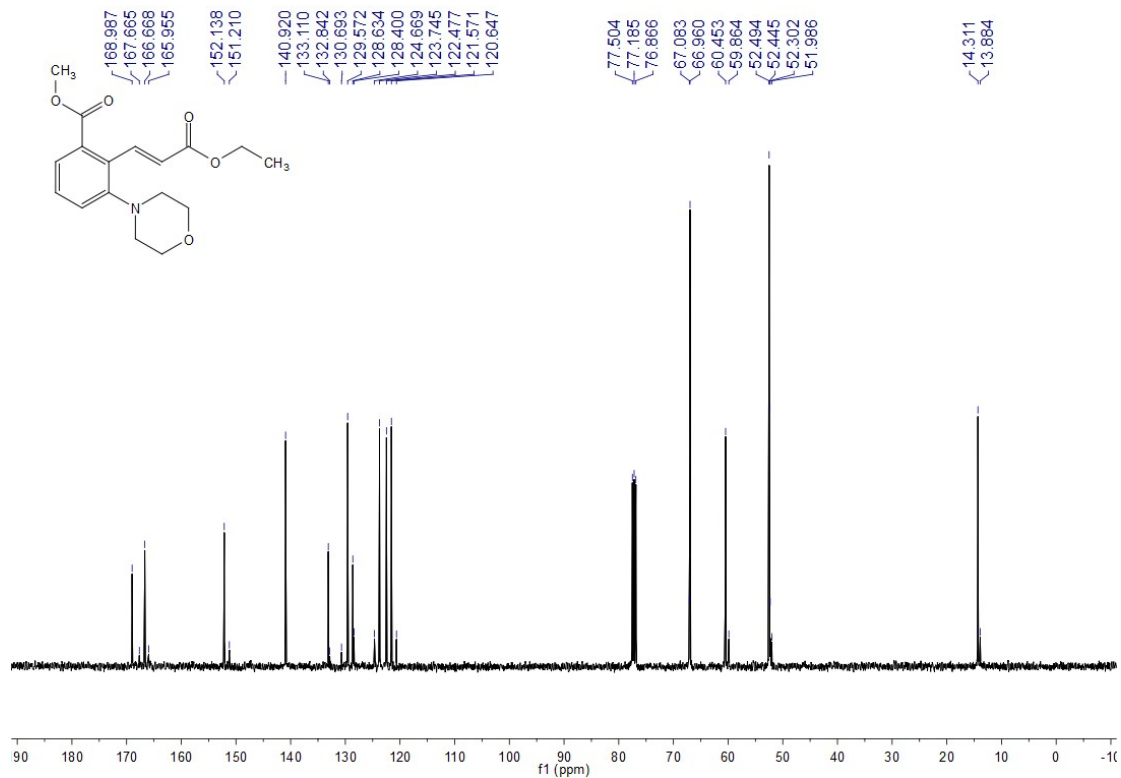

### <sup>1</sup>H NMR Spectrum of 4ad

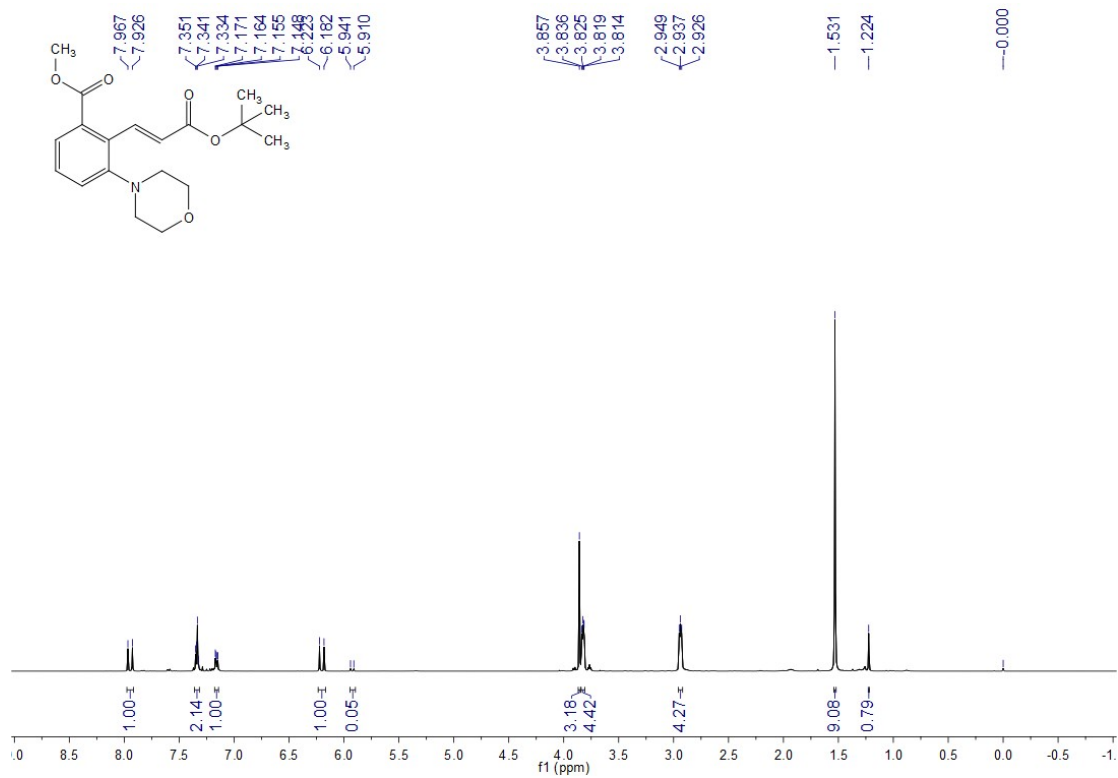

### <sup>13</sup>C NMR Spectrum of 4ad

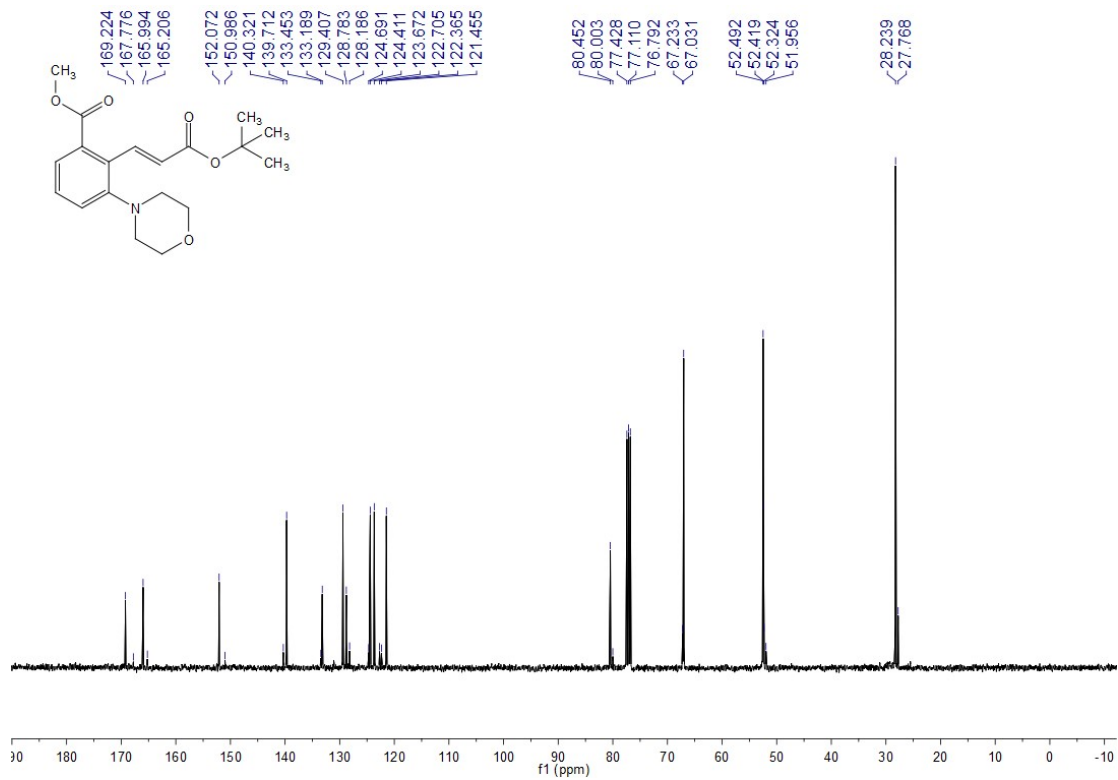

### <sup>1</sup>H NMR Spectrum of 4ae

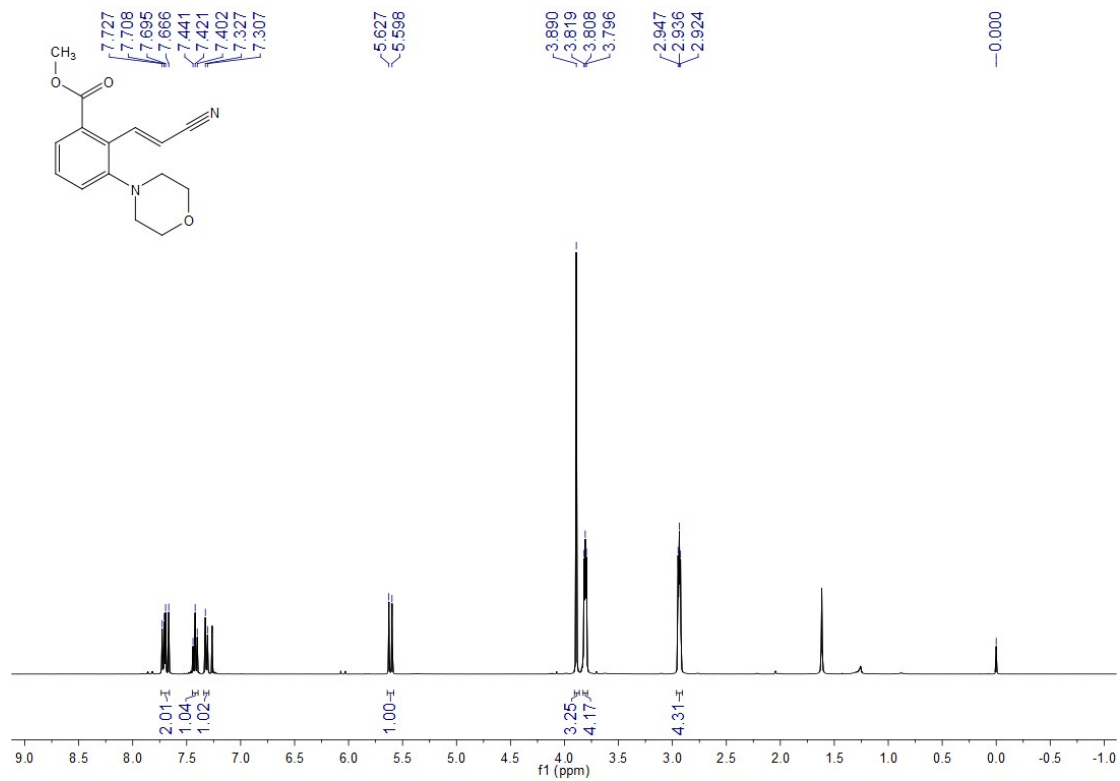

### <sup>13</sup>C NMR Spectrum of 4ae

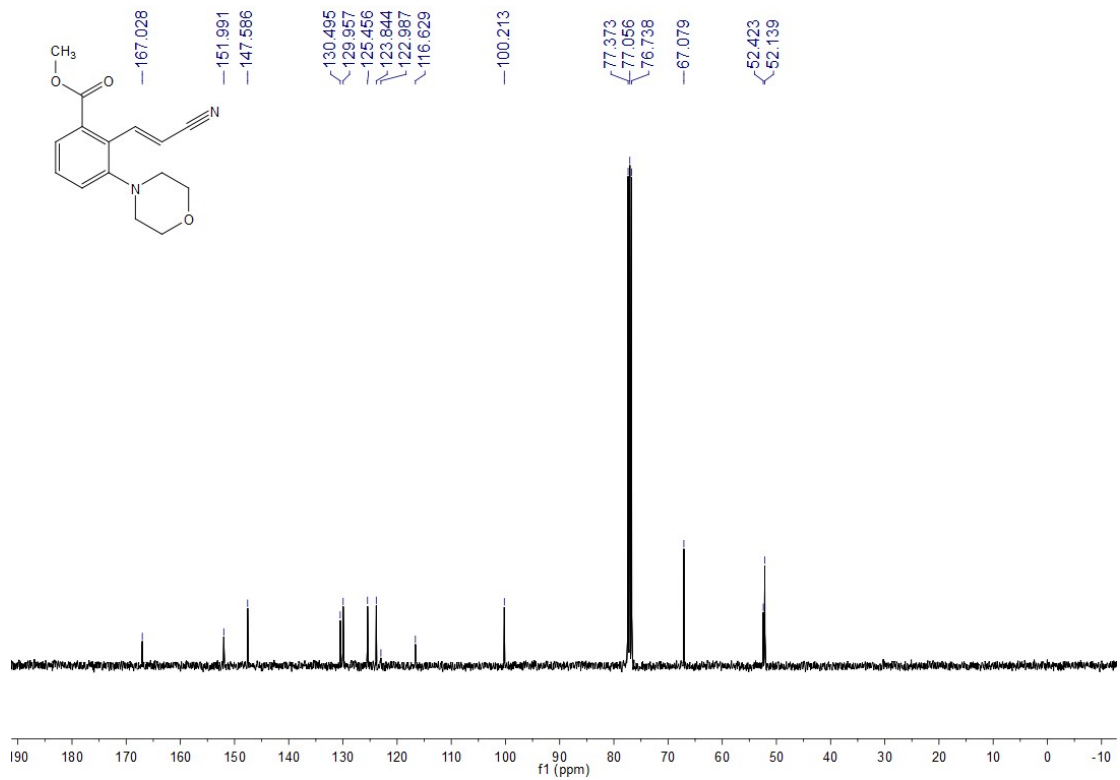

### <sup>1</sup>H NMR Spectrum of 4af

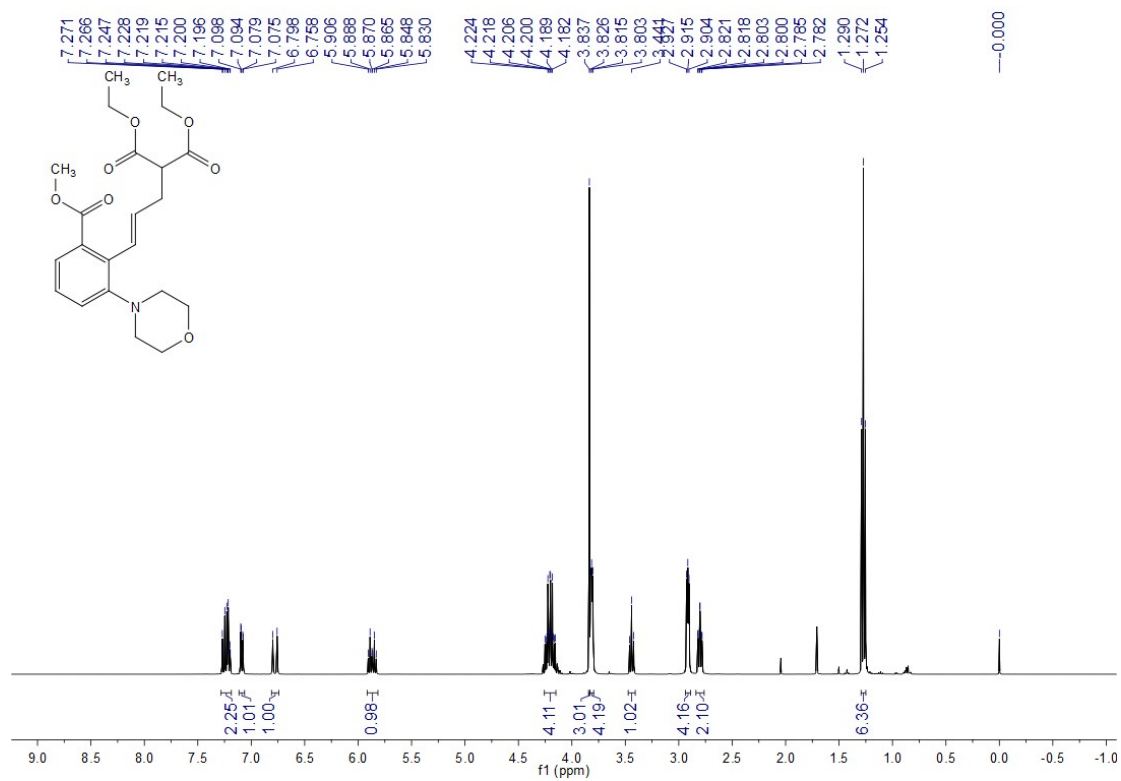

### <sup>13</sup>C NMR Spectrum of 4af

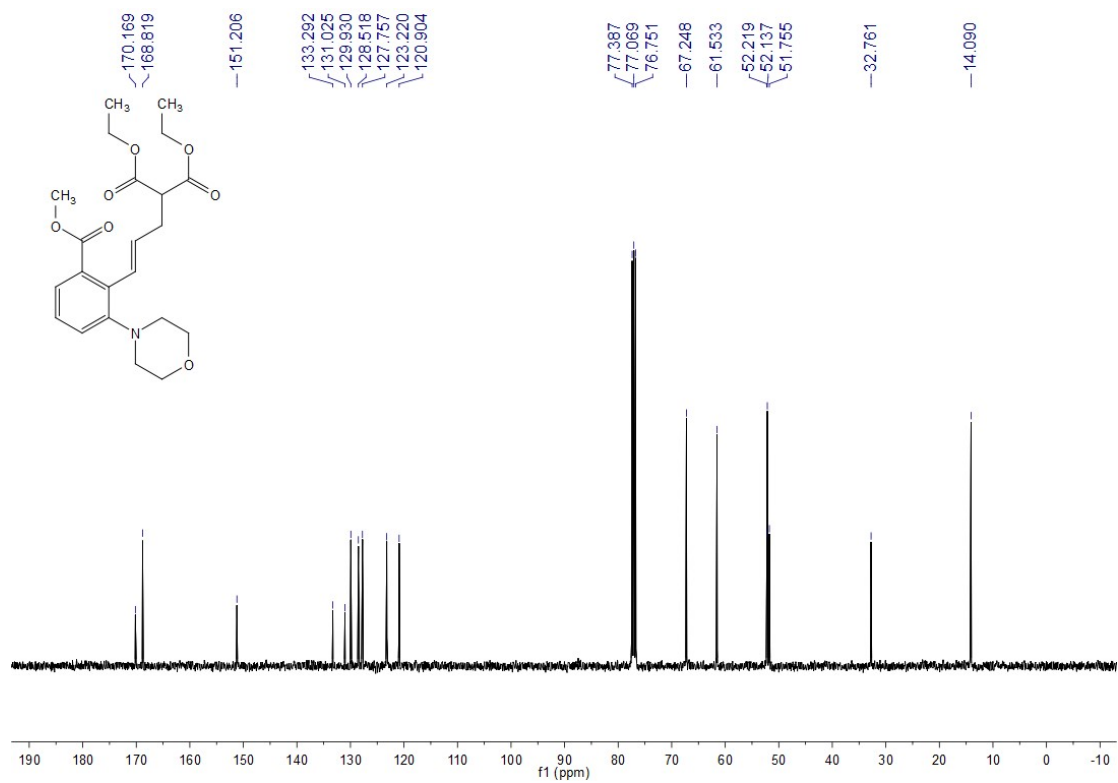

### <sup>1</sup>H NMR Spectrum of 4ag

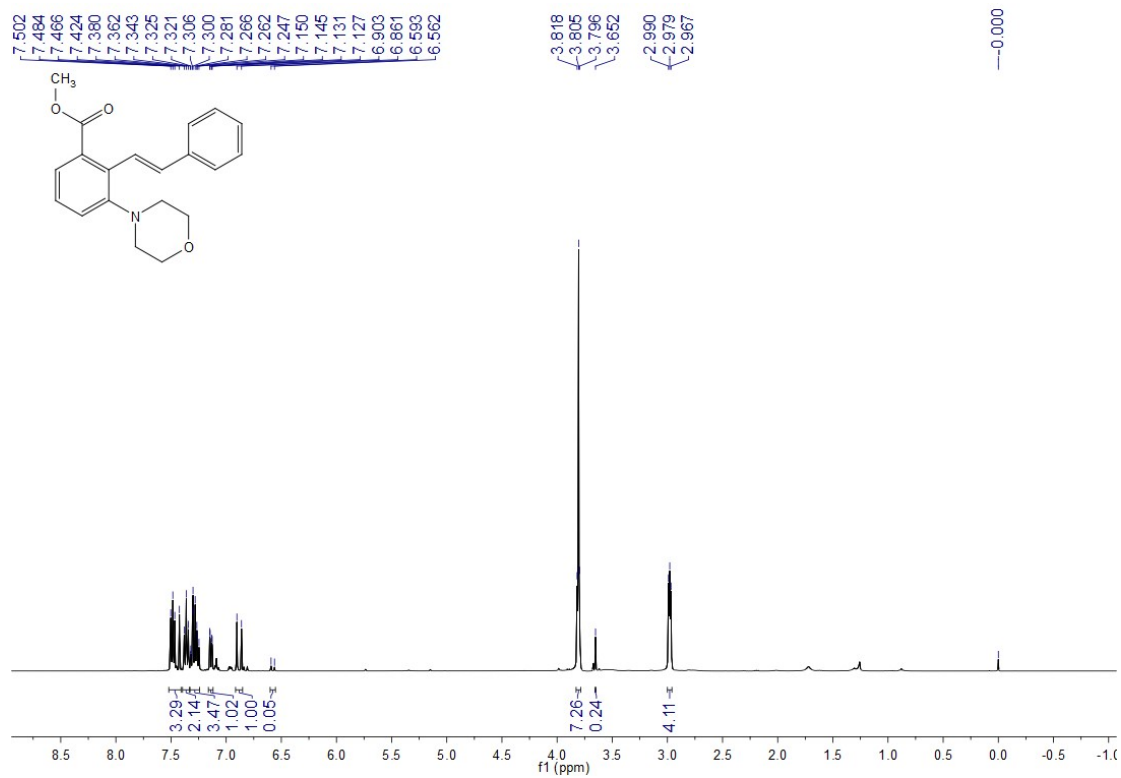

### <sup>13</sup>C NMR Spectrum of 4ag

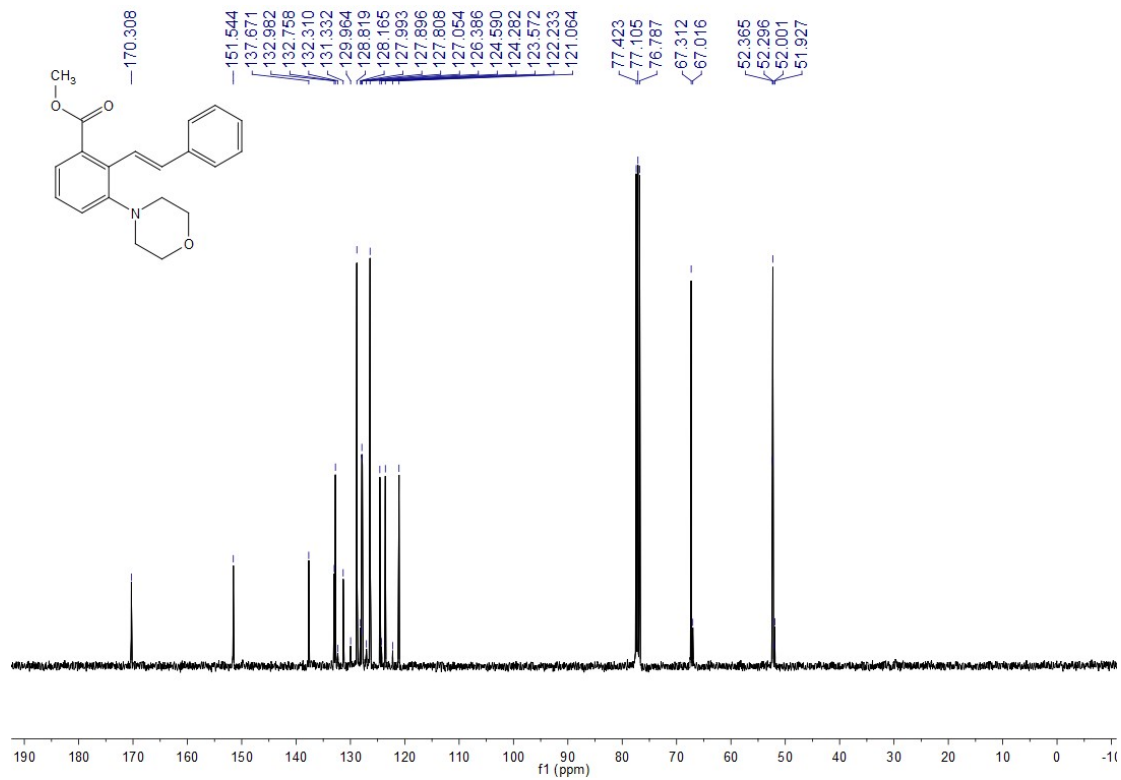

### <sup>1</sup>H NMR Spectrum of 4ah

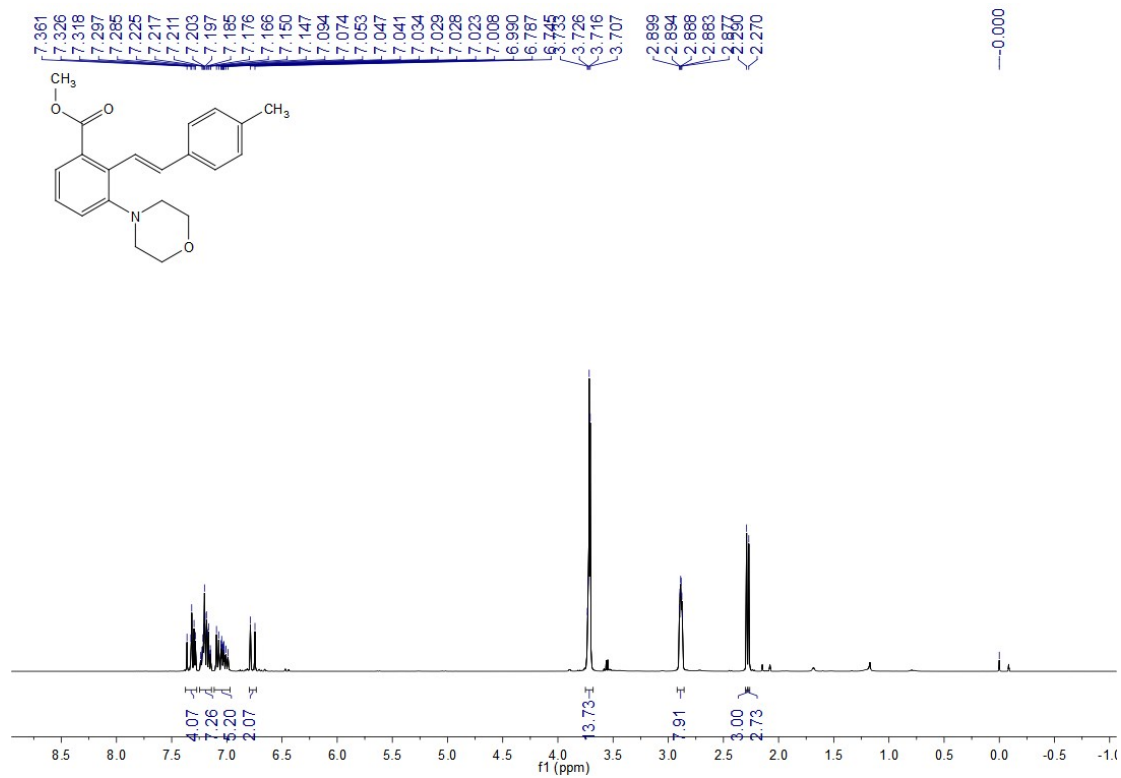

### <sup>13</sup>C NMR Spectrum of 4ah

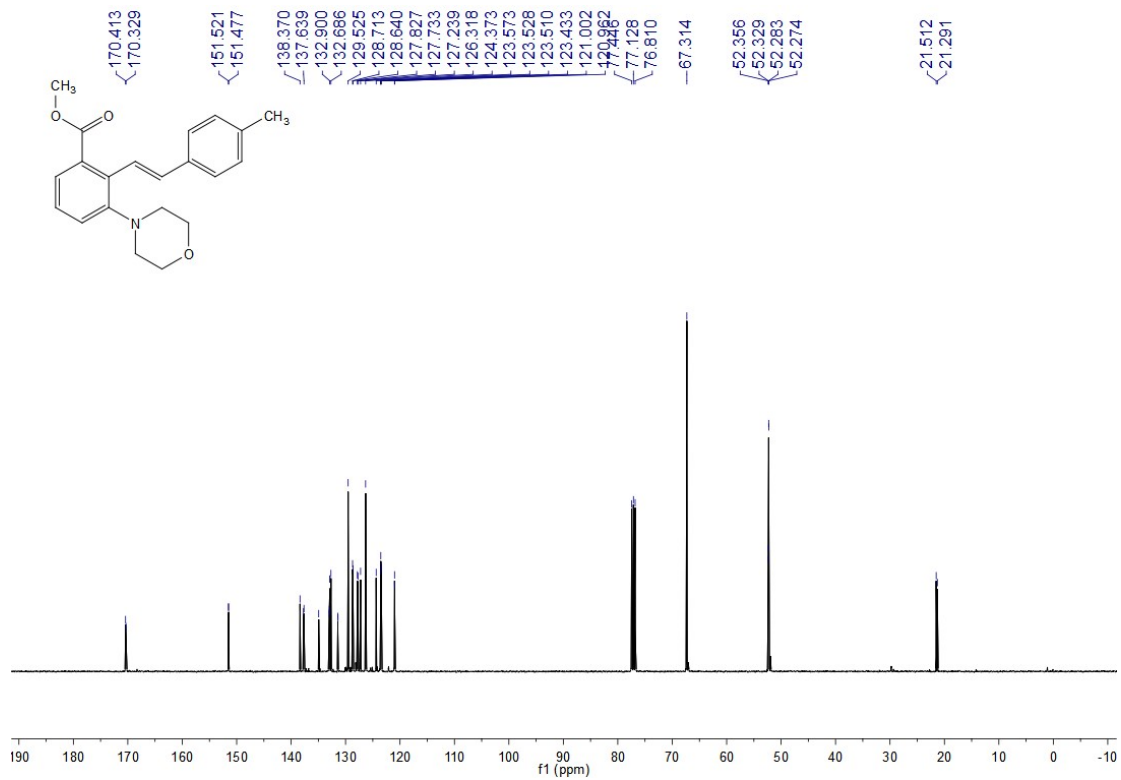



<sup>1</sup>H NMR Spectrum of **4ai**

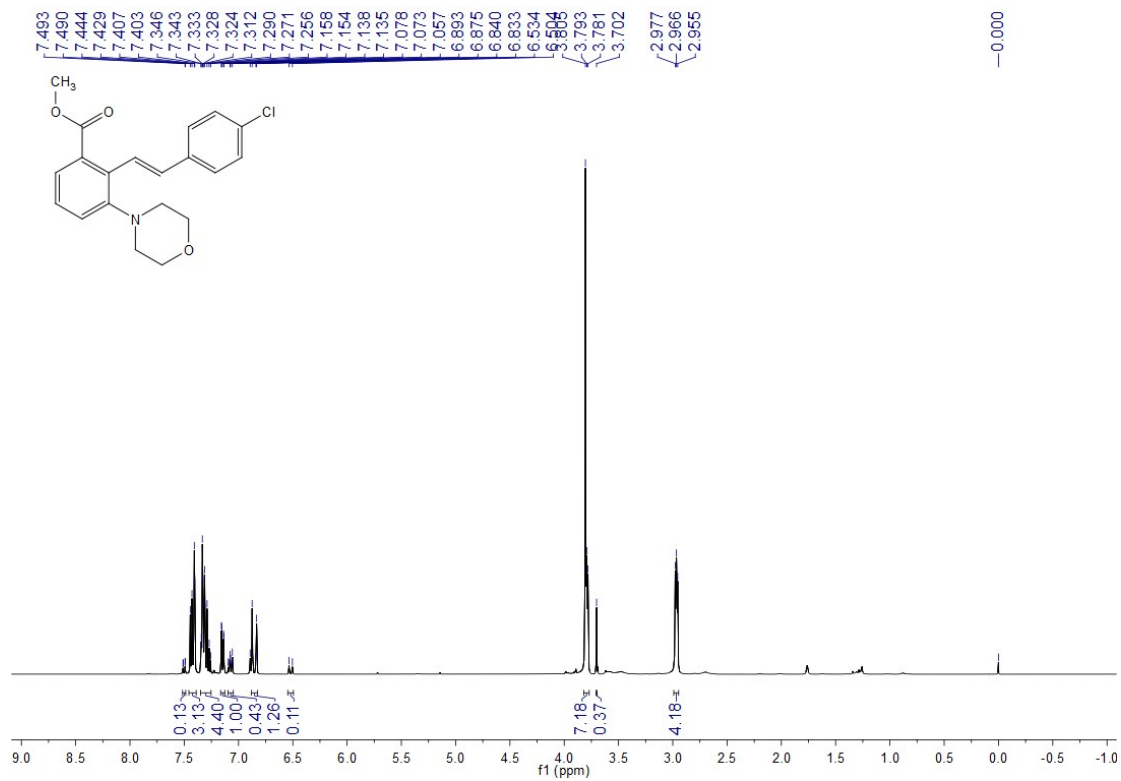

<sup>13</sup>C NMR Spectrum of **4ai**

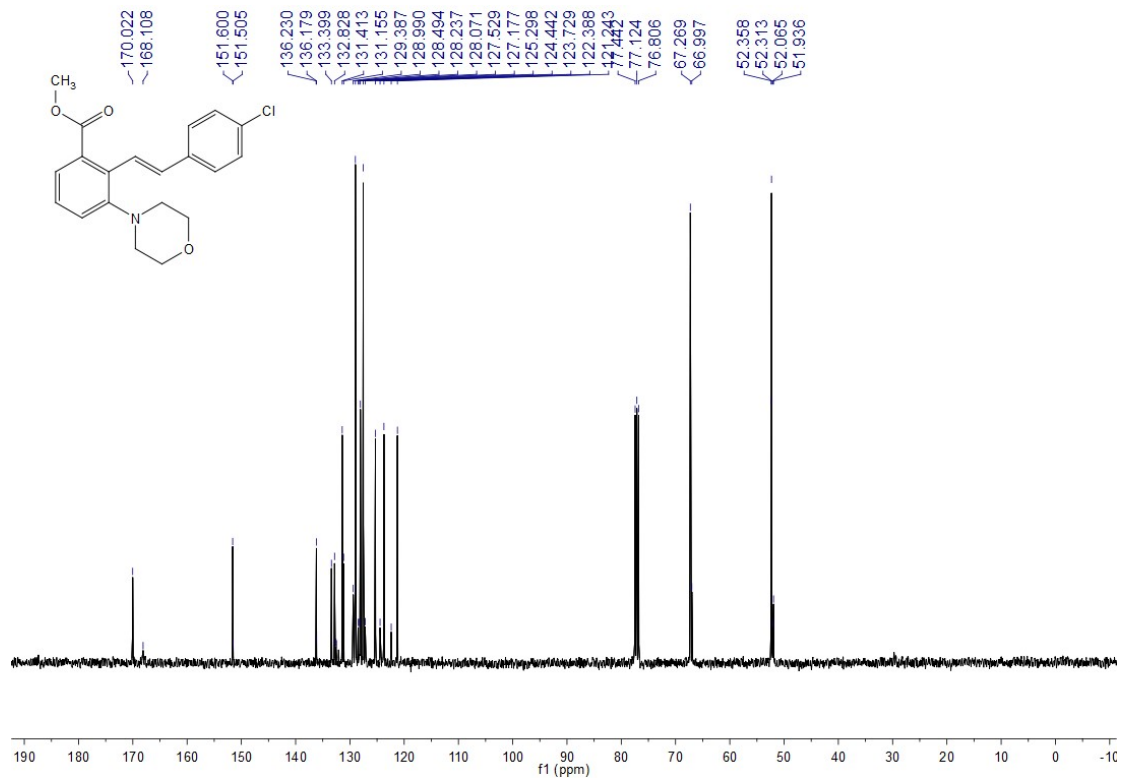

### <sup>1</sup>H NMR Spectrum of 4aj

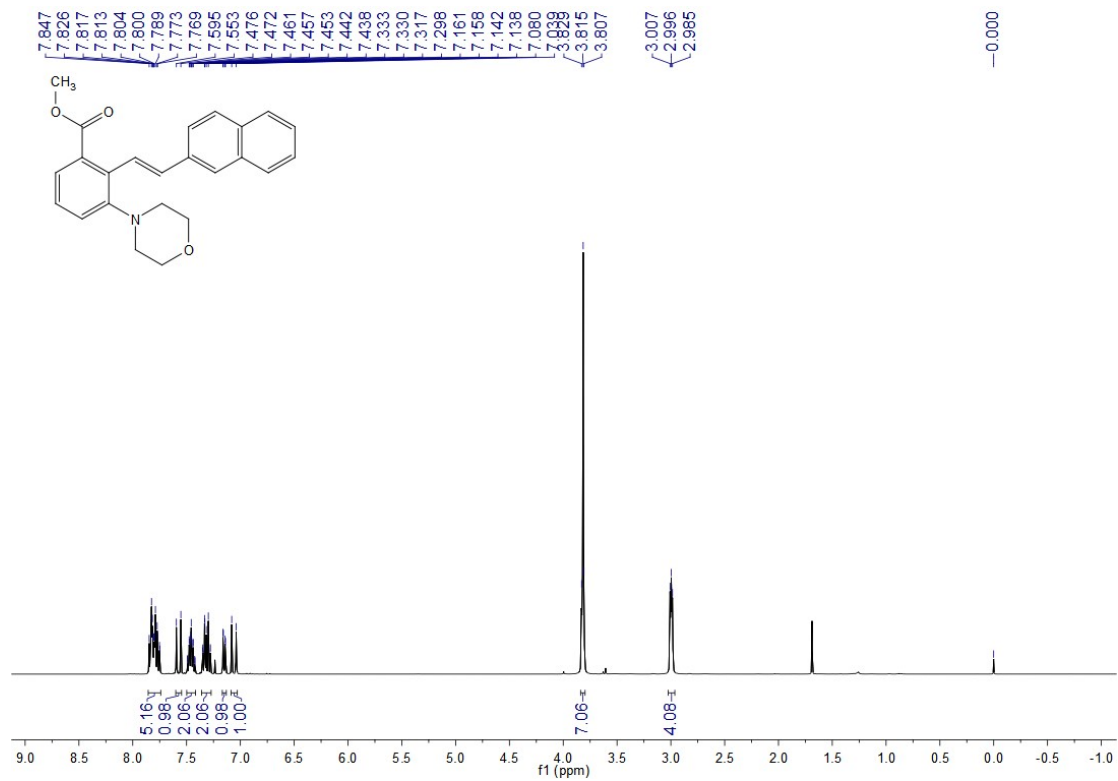

### <sup>13</sup>C NMR Spectrum of 4aj

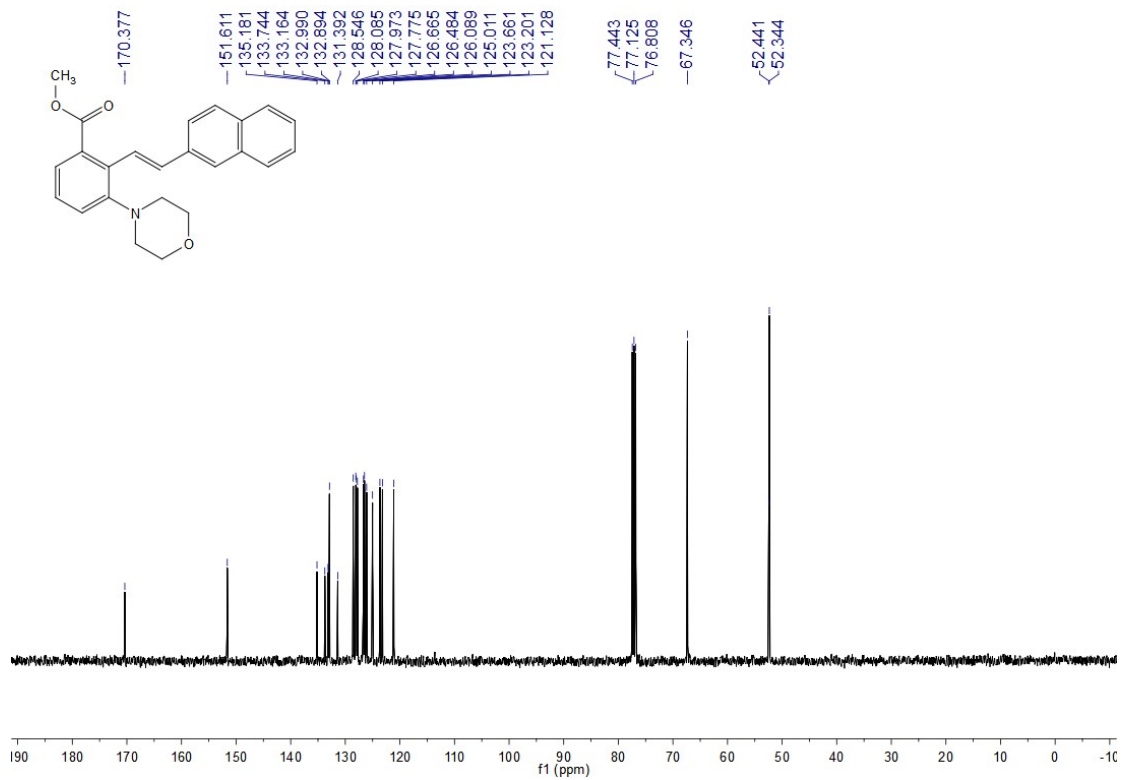

### <sup>1</sup>H NMR Spectrum of 4ak

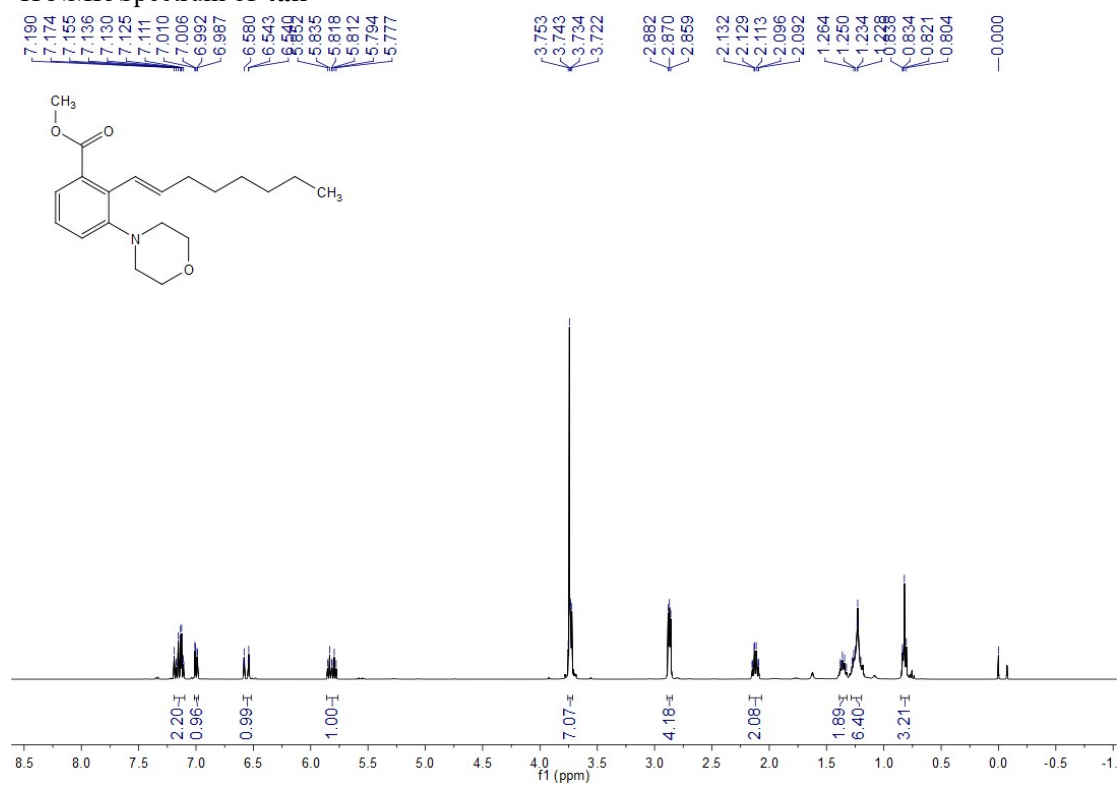

### <sup>13</sup>C NMR Spectrum of 4ak

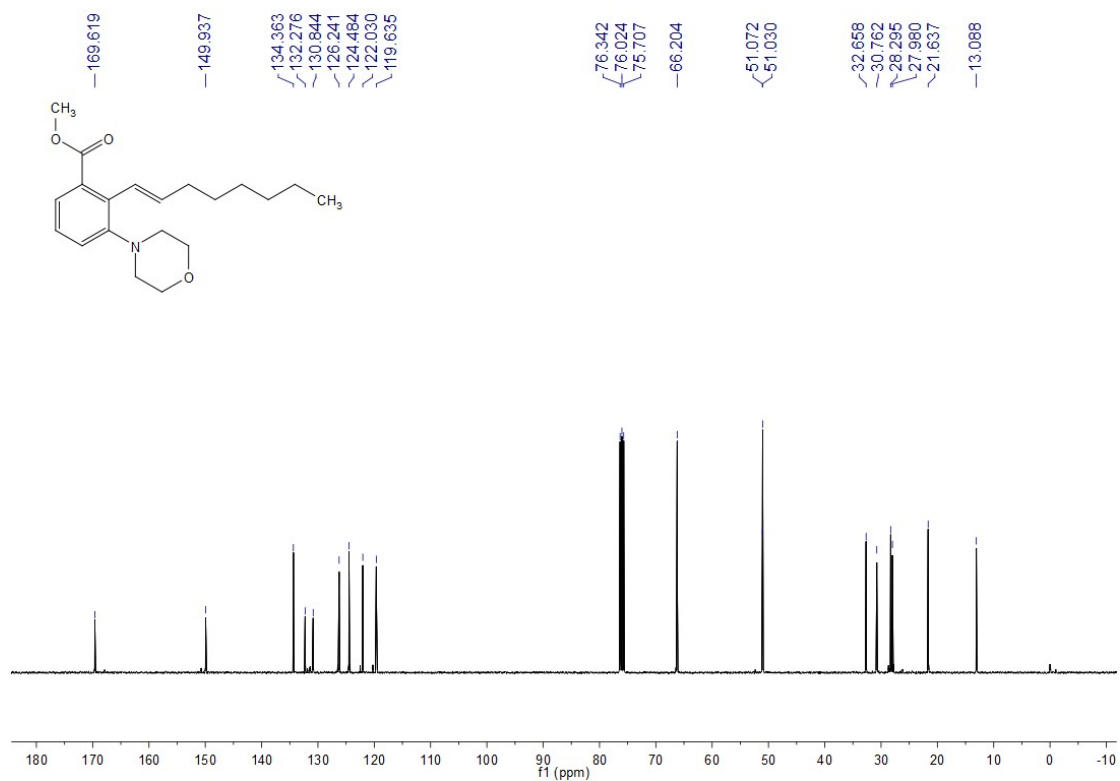

### <sup>1</sup>H NMR Spectrum of 4ak

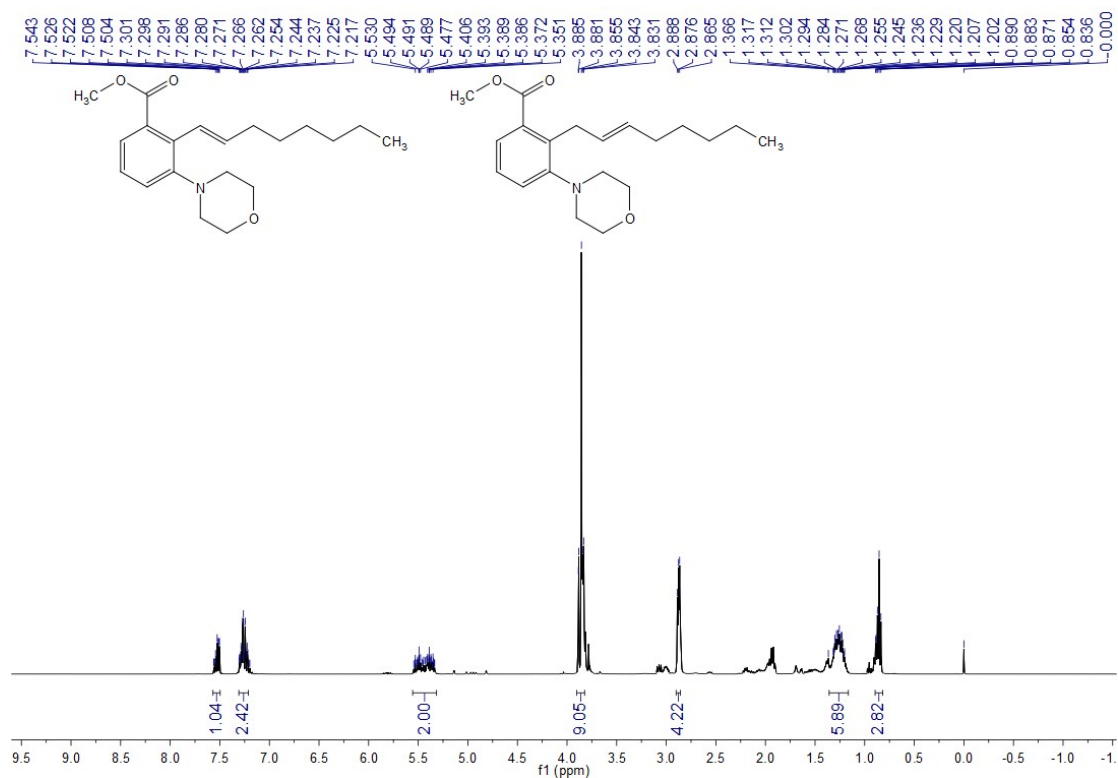

### <sup>13</sup>C NMR Spectrum of 4ak

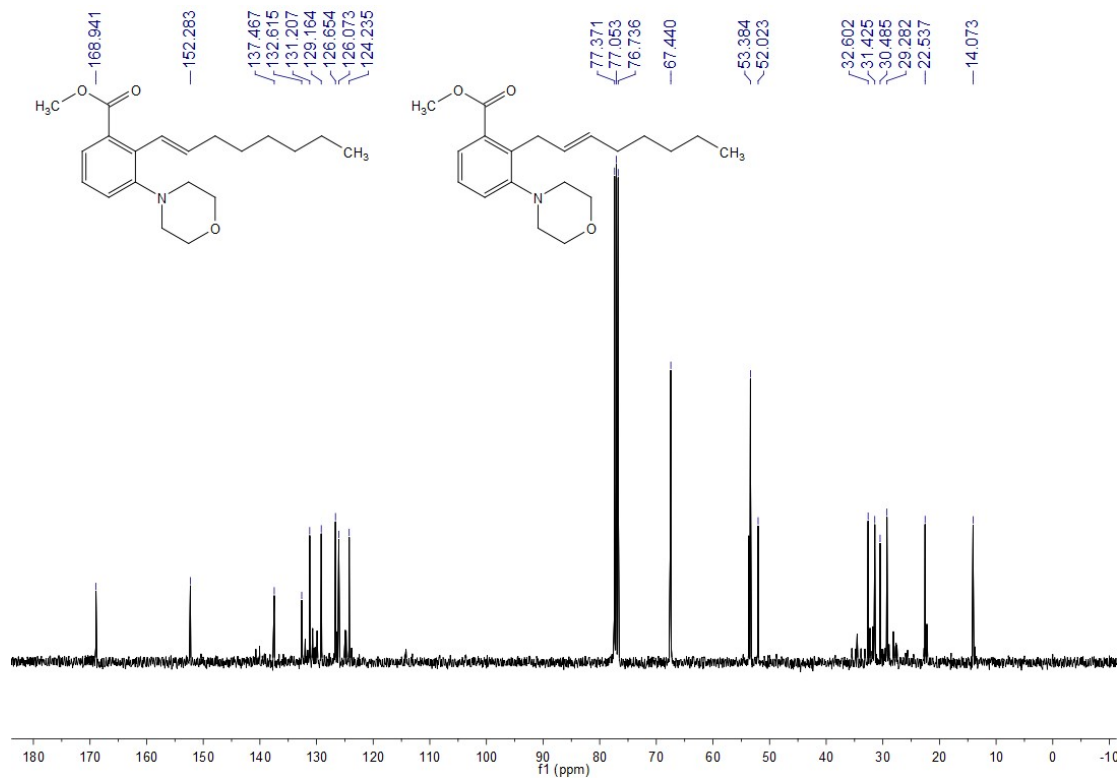

### <sup>1</sup>H NMR Spectrum of **4aI**

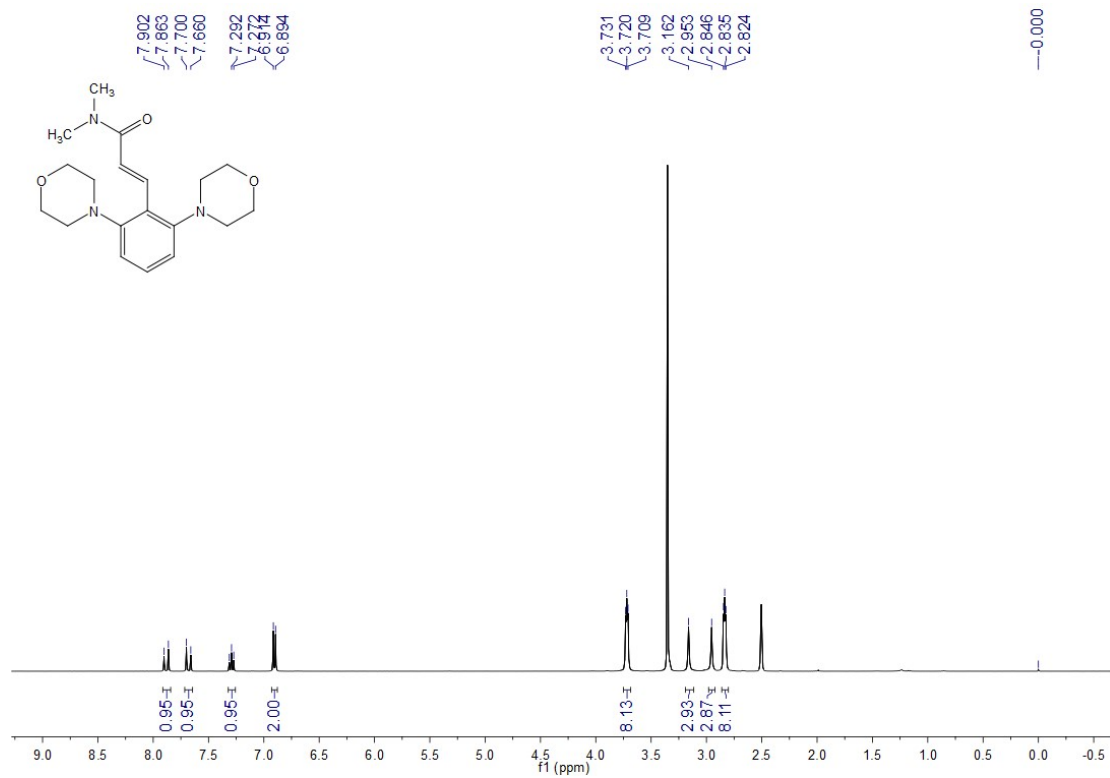

### <sup>13</sup>C NMR Spectrum of **4aI**

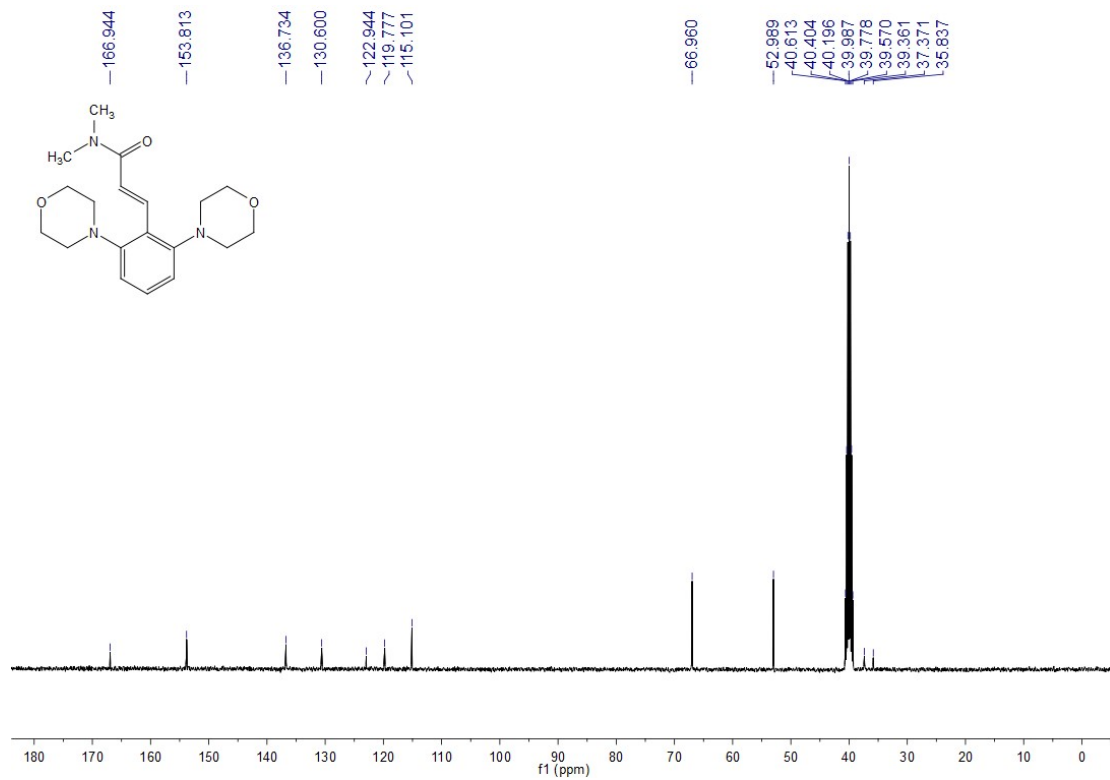

GC data diagram of 4a product,  $f = 1.46$

SHIMADZU LabSolutions 分析报告

<样品信息>

样品名 :  
 样品ID :  
 数据文件名 : N, N-二甲基丙烯酰胺. gcb  
 方法文件名 : 高温方法-280度-25min. gcm  
 批处理文件名 : 20220321. gcb  
 样品瓶号 : 3  
 进样体积 : 1 uL  
 分析日期 : 2022/3/21 23:43:12  
 处理日期 : 2022/3/21 0:08:17  
 样品类型 : 未知  
 分析者 : System Administrator  
 处理者 : System Administrator

<色谱图>

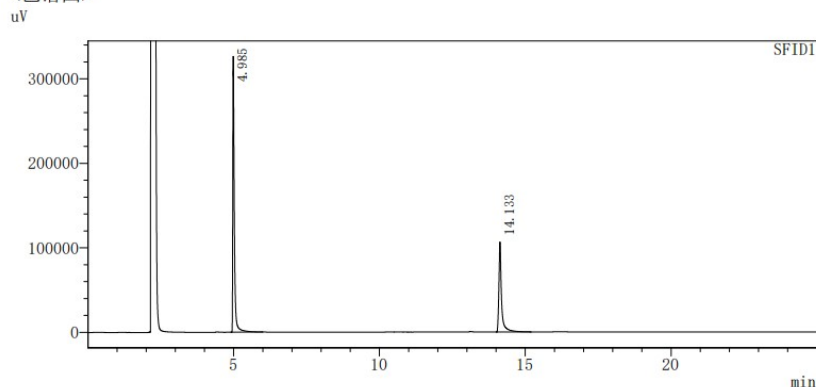

<峰表>

| 峰号 | 保留时间   | 面积      | 高度     | 浓度      | 浓度单位 | 标记 | 化合物名 |
|----|--------|---------|--------|---------|------|----|------|
| 1  | 4.985  | 1199051 | 324098 | 64.120  |      | V  |      |
| 2  | 14.133 | 670960  | 106385 | 35.880  |      |    |      |
| 总计 |        | 1870011 | 430483 | 100.000 |      |    |      |

GC data diagram of entry 1

SHIMADZU LabSolutions 分析报告

<样品信息>

样品名 :  
 样品ID :  
 数据文件名 : L-PP2. gcb  
 方法文件名 : 高温方法-280度-25min. gcm  
 批处理文件名 : 20220310. gcb  
 样品瓶号 : 13  
 进样体积 : 1 uL  
 分析日期 : 2022/3/10 17:21:47  
 处理日期 : 2022/3/10 17:46:50  
 样品类型 : 未知  
 分析者 : System Administrator  
 处理者 : System Administrator

<色谱图>

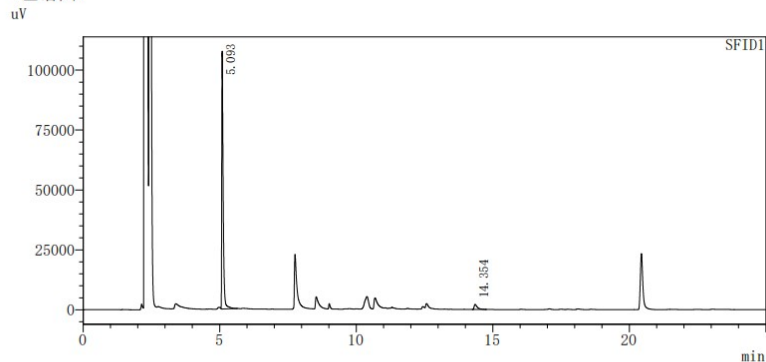

<峰表>

| 峰号 | 保留时间   | 面积     | 高度     | 浓度     | 浓度单位 | 标记 | 化合物名 |
|----|--------|--------|--------|--------|------|----|------|
| 1  | 5.093  | 388399 | 107051 | 95.758 |      |    |      |
| 2  | 14.354 | 17204  | 2137   | 4.242  |      |    |      |
| 总计 |        | 405603 | 109188 |        |      |    |      |

GC data diagram of entry 3

SHIMADZU LabSolutions 分析报告

<样品信息>

样品名 :  
 样品ID :  
 数据文件名 : L-5.gcd  
 方法文件名 : 高温方法-280度-25min.gcm  
 批处理文件名 : 20220307.gcb  
 样品瓶号 : 1  
 进样体积 : 1 uL  
 分析日期 : 2022/3/7 8:20:22  
 处理日期 : 2022/3/7 8:45:28  
 样品类型 : 未知  
 分析者 : System Administrator  
 处理者 : System Administrator

<色谱图>

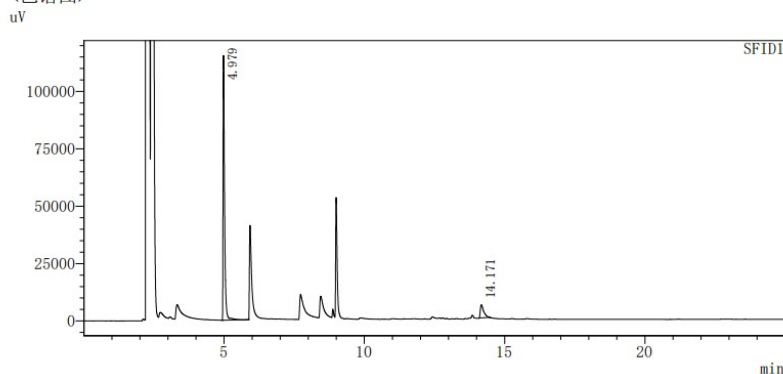

<峰表>

| 峰号 | 保留时间   | 面积     | 高度     | 浓度     | 浓度单位 | 标记 | 化合物名 |
|----|--------|--------|--------|--------|------|----|------|
| 1  | 4.979  | 427857 | 114979 | 89.833 |      | S  |      |
| 2  | 14.171 | 48423  | 5724   | 10.167 |      | M  |      |
| 总计 |        | 476280 | 120702 |        |      |    |      |

GC data diagram of entry 5

SHIMADZU LabSolutions 分析报告

<样品信息>

样品名 :  
 样品ID :  
 数据文件名 : L-7.gcb  
 方法文件名 : 高温方法-280度-25min.gcm  
 批处理文件名 : 20220307.gcb  
 样品瓶号 : 1  
 进样体积 : 1 uL  
 分析日期 : 2022/3/7 12:37:22  
 处理日期 : 2022/3/7 13:02:26  
 样品类型 : 未知  
 分析者 : System Administrator  
 处理者 : System Administrator

<色谱图>

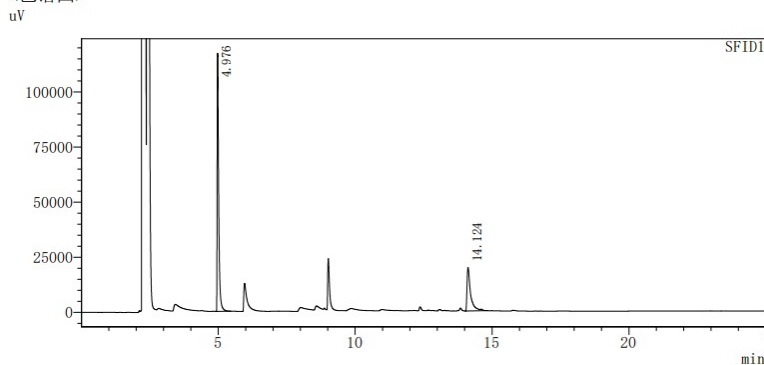

<峰表>

| 峰号 | 保留时间   | 面积     | 高度     | 浓度     | 浓度单位 | 标记 | 化合物名 |
|----|--------|--------|--------|--------|------|----|------|
| 1  | 4.976  | 448022 | 116256 | 71.375 |      |    |      |
| 2  | 14.124 | 179677 | 19674  | 28.625 |      |    |      |
| 总计 |        | 627699 | 135930 |        |      |    |      |

GC data diagram of entry 7

SHIMADZU LabSolutions 分析报告

<样品信息>

样品名 :  
 样品ID :  
 数据文件名 : L-9. gcb  
 方法文件名 : 高温方法-280度-25min. gcm  
 批处理文件名 : 20220309. gcb  
 样品瓶号 : 11  
 进样体积 : 1 uL  
 分析日期 : 2022/3/9 16:15:29  
 处理日期 : 2022/3/9 16:40:24  
 样品类型 : 未知  
 分析者 : System Administrator  
 处理者 : System Administrator

<色谱图>

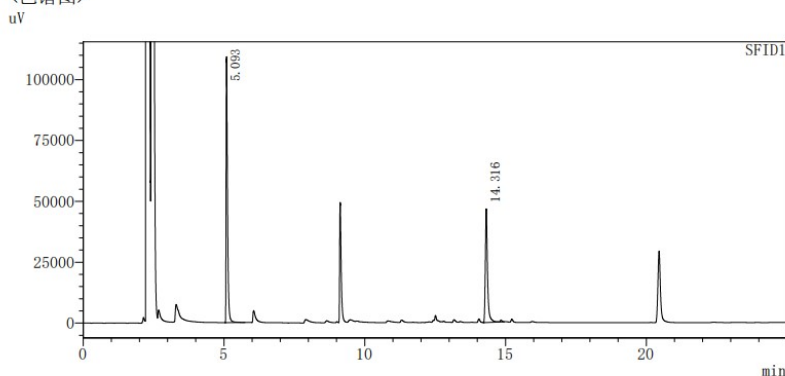

<峰表>

| 峰号 | 保留时间   | 面积     | 高度     | 浓度     | 浓度单位 | 标记 | 化合物名 |
|----|--------|--------|--------|--------|------|----|------|
| 1  | 5.093  | 383976 | 108703 | 60.329 |      |    |      |
| 2  | 14.316 | 252489 | 46562  | 39.671 |      | S  |      |
| 总计 |        | 636465 | 155264 |        |      |    |      |

GC data diagram of entry 9

SHIMADZU LabSolutions 分析报告

<样品信息>

样品名 :  
 样品ID :  
 数据文件名 : L-10. gcb  
 方法文件名 : 高温方法-280度-25min. gcm  
 批处理文件名 : 20220311. gcb  
 样品瓶号 : 25  
 进样体积 : 1 uL  
 分析日期 : 2022/3/11 1:13:23  
 处理日期 : 2022/3/11 1:38:37  
 样品类型 : 未知  
 分析者 : System Administrator  
 处理者 : System Administrator

<色谱图>

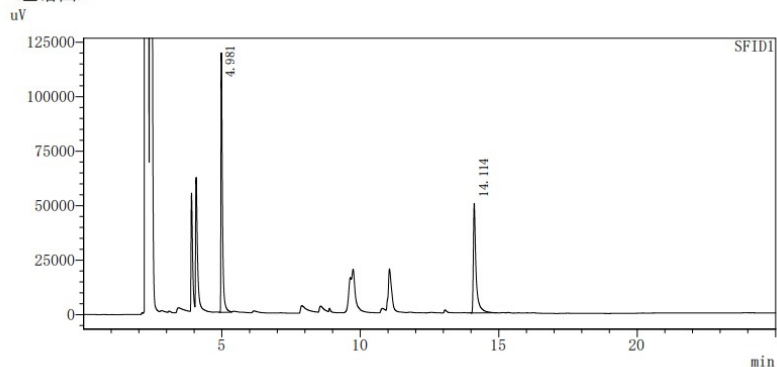

<峰表>

| 峰号 | 保留时间   | 面积     | 高度     | 浓度     | 浓度单位 | 标记 | 化合物名 |
|----|--------|--------|--------|--------|------|----|------|
| 1  | 4.981  | 445335 | 118342 | 56.713 |      |    |      |
| 2  | 14.114 | 339912 | 50163  | 43.287 |      |    |      |
| 总计 |        | 785247 | 168504 |        |      |    |      |



GC data diagram of entry 30

SHIMADZU LabSolutions 分析报告

<样品信息>

样品名 :  
 样品ID :  
 数据文件名 : wendu-3.gcd  
 方法文件名 : 高温方法-280度-25min.gcm  
 批处理文件名 : 20220417.gcb  
 样品瓶号 : 5  
 进样体积 : 1 uL  
 分析日期 : 2022/4/17 11:20:40  
 处理日期 : 2022/4/17 11:45:54  
 样品类型 : 未知  
 分析者 : System Administrator  
 处理者 : System Administrator

<色谱图>

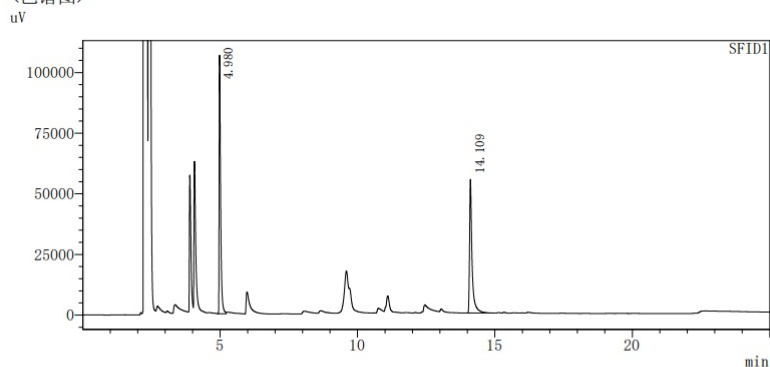

<峰表>

| 峰号 | 保留时间   | 面积     | 高度     | 浓度     | 浓度单位 | 标记 | 化合物名 |
|----|--------|--------|--------|--------|------|----|------|
| 1  | 4.980  | 391792 | 105736 | 53.208 |      |    |      |
| 2  | 14.109 | 344543 | 55040  | 46.792 |      |    |      |
| 总计 |        | 736335 | 160775 |        |      |    |      |

GC data diagram of entry 19

SHIMADZU LabSolutions 分析报告

<样品信息>

样品名 :  
 样品ID :  
 数据文件名 : 20220318-N-5.gcd  
 方法文件名 : 高温方法-280度-22min.gcm  
 批处理文件名 : 20220415.gcb  
 样品瓶号 : 2  
 进样体积 : 1 uL  
 分析日期 : 2022/4/15 11:05:41  
 处理日期 : 2022/4/15 11:27:43  
 样品类型 : 未知  
 分析者 : System Administrator  
 处理者 : System Administrator

<色谱图>

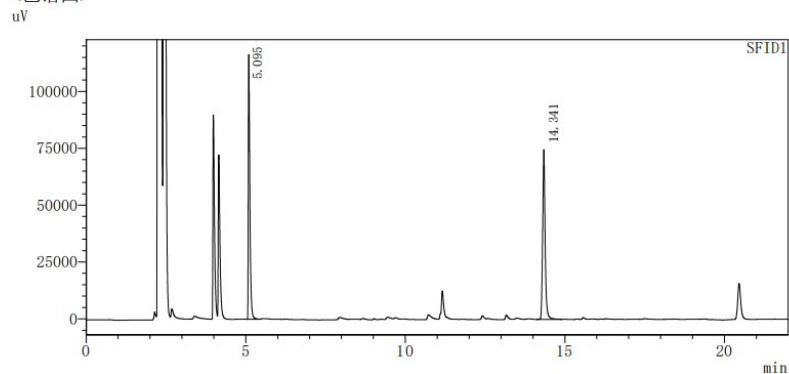

<峰表>

| 峰号 | 保留时间   | 面积     | 高度     | 浓度     | 浓度单位 | 标记 | 化合物名 |
|----|--------|--------|--------|--------|------|----|------|
| 1  | 5.095  | 393989 | 115912 | 49.642 |      |    |      |
| 2  | 14.341 | 399675 | 74367  | 50.358 |      | S  |      |
| 总计 |        | 793663 | 190279 |        |      |    |      |

GC data diagram of entry 31

SHIMADZU LabSolutions 分析报告

<样品信息>

样品名 :  
 样品ID :  
 数据文件名 : 2023.3.14-1.gcd  
 方法文件名 : 高温方法-280度-25min.gcm  
 批处理文件名 : 20230314.gcb  
 样品瓶号 : 1  
 进样体积 : 1 uL  
 分析日期 : 2023/3/14 22:50:59  
 处理日期 : 2023/3/14 23:16:05  
 样品类型 : 未知  
 分析者 : System Administrator  
 处理者 : System Administrator

<色谱图>

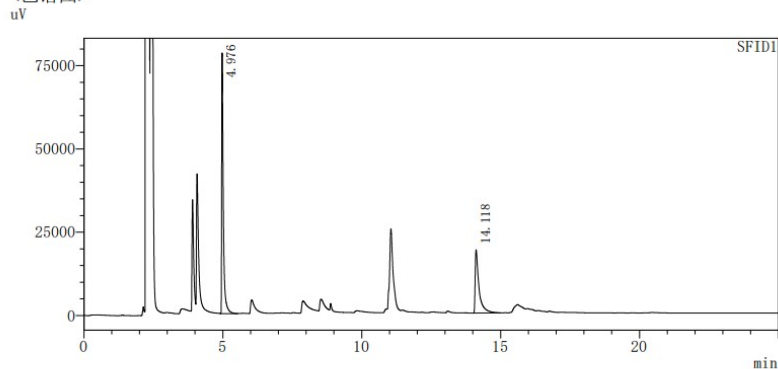

<峰表>

| 峰号 | 保留时间   | 面积     | 高度    | 浓度      | 浓度单位 | 标记 | 化合物名 |
|----|--------|--------|-------|---------|------|----|------|
| 1  | 4.976  | 323576 | 77921 | 64.252  |      |    |      |
| 2  | 14.118 | 180031 | 18982 | 35.748  |      |    |      |
| 总计 |        | 503606 | 96903 | 100.000 |      |    |      |

### HRMS of 4b

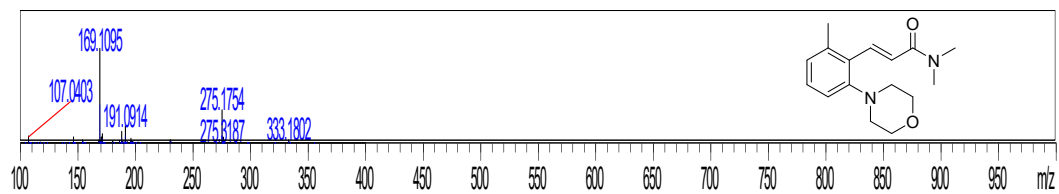

### HRMS of 4c

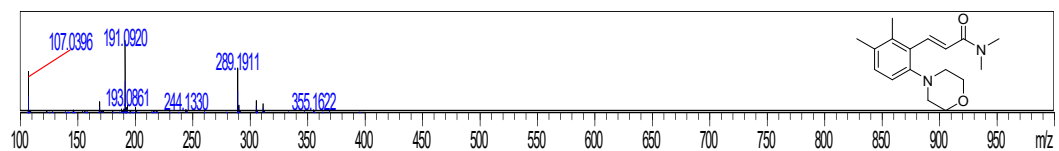

### HRMS of 4d

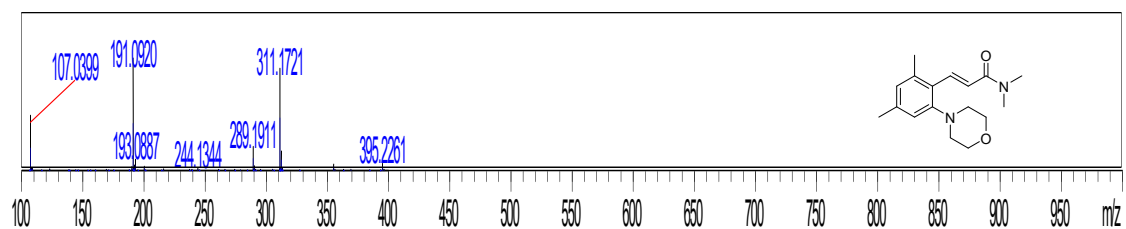

### HRMS of 4f

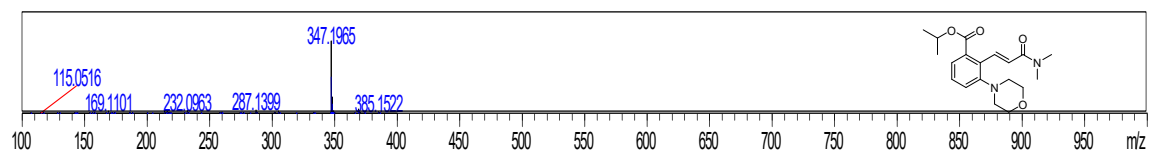

### HRMS of 4i

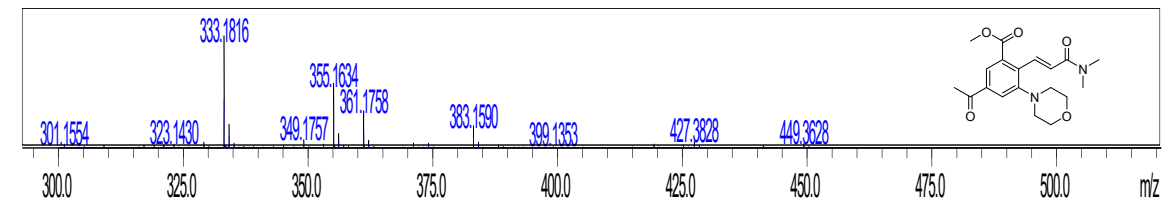

### HRMS of 4m

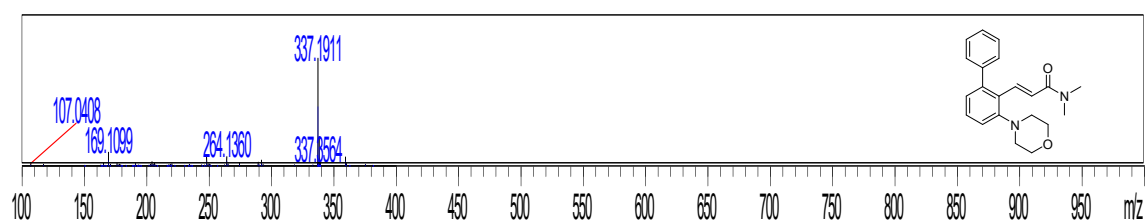

### HRMS of 4n

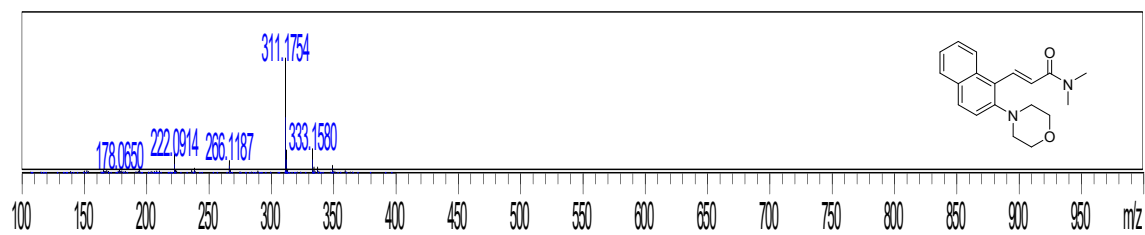

### HRMS of 4o

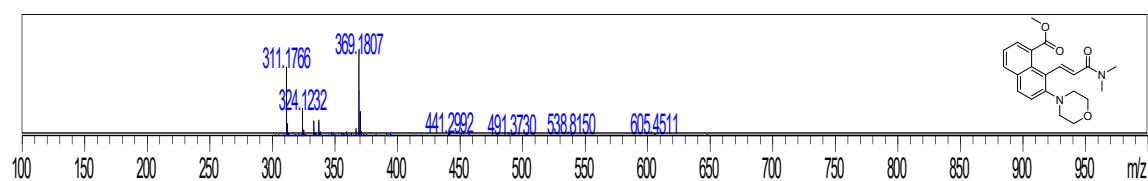

### HRMS of 4p

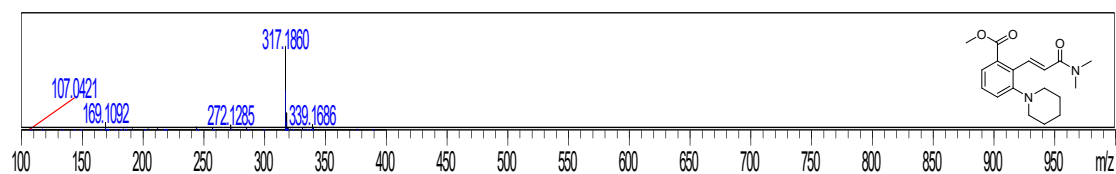

### HRMS of 4q

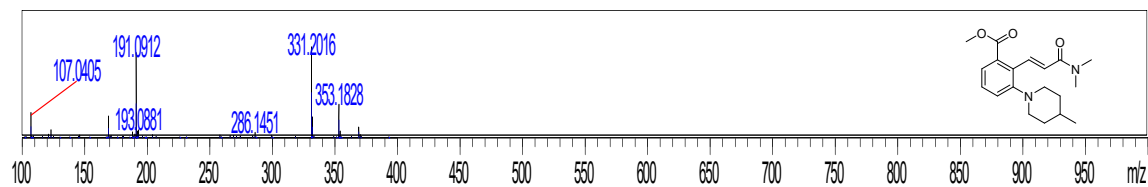

### HRMS of 4r

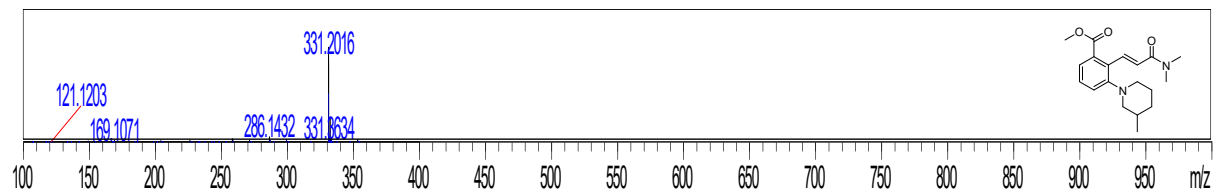

### HRMS of 4s

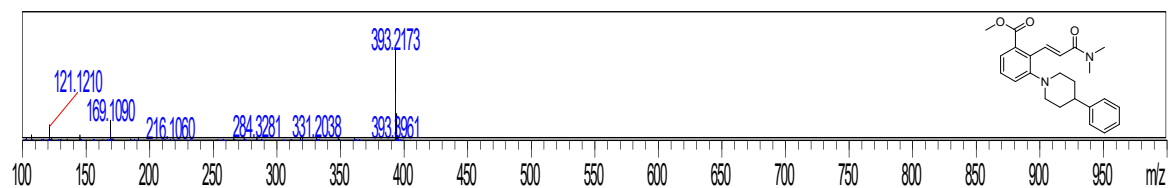

### HRMS of 4t

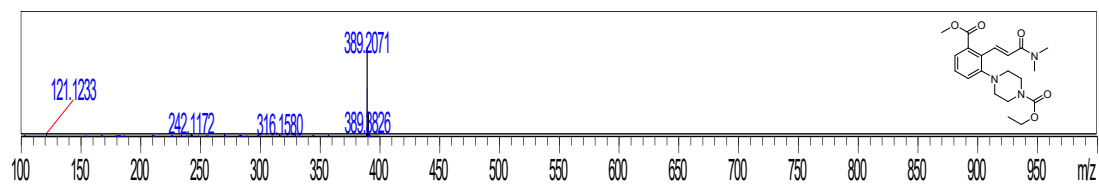

### HRMS of 4v

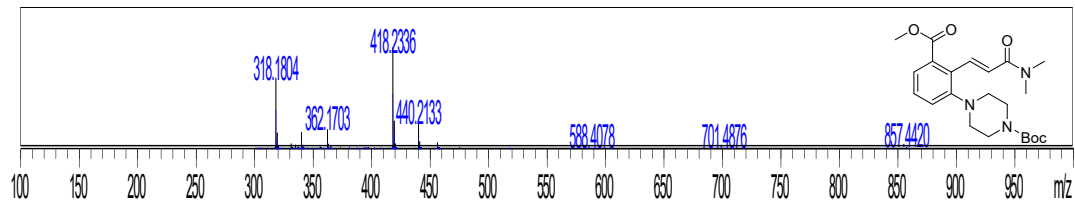

### HRMS of 4w

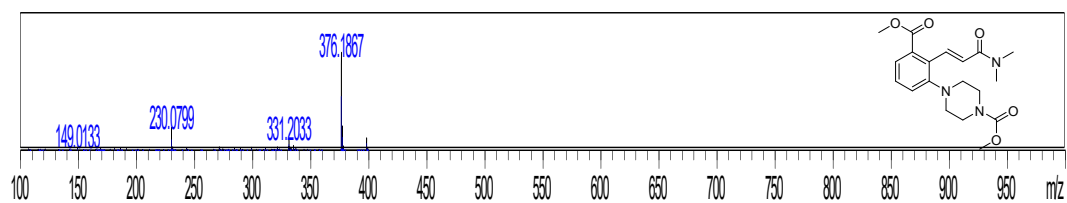

### HRMS of 4x

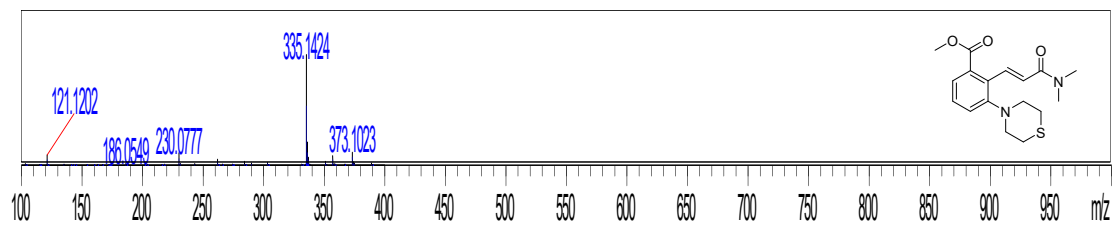

### HRMS of 4z

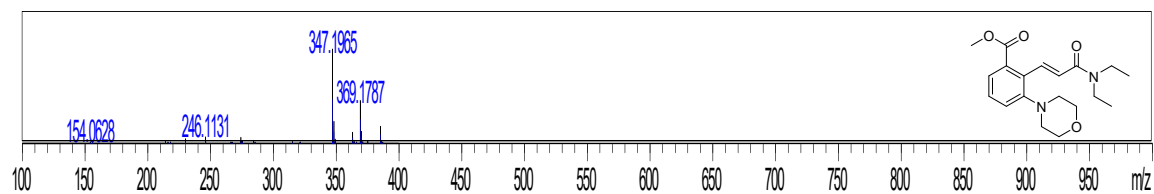

### HRMS of 4ab

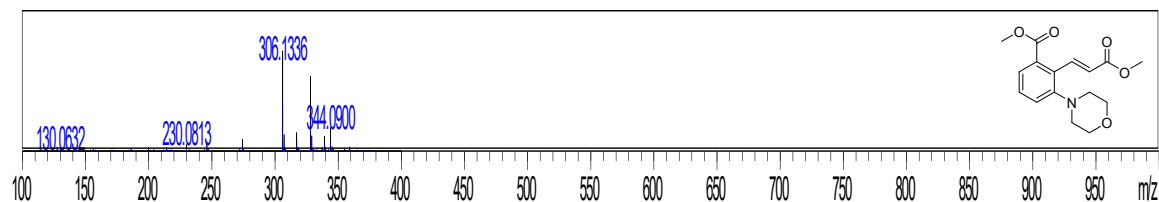

### HRMS of 4ad

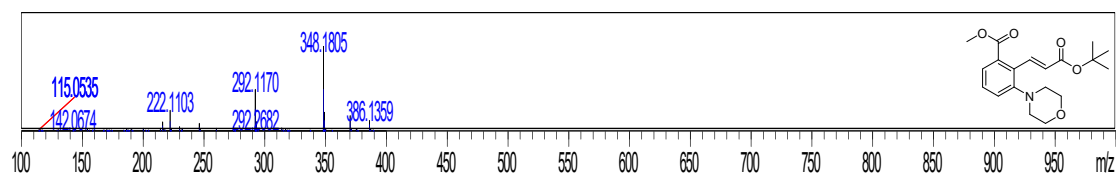

### HRMS of 4ae

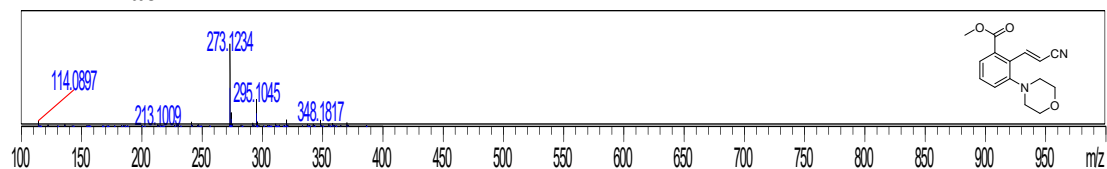

### HRMS of 4af

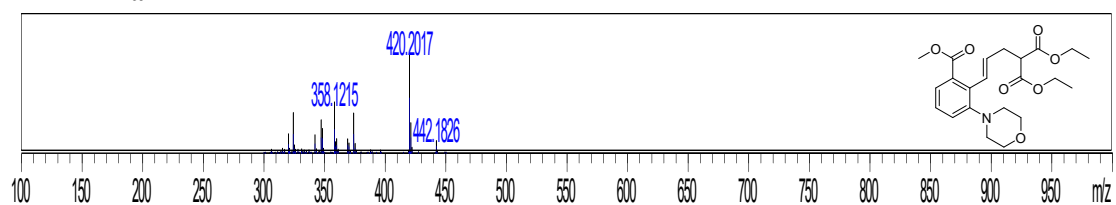

### HRMS of 4ah

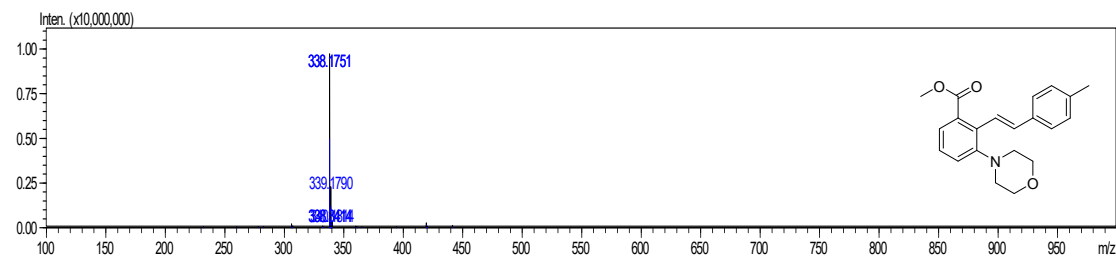

### HRMS of 4ai

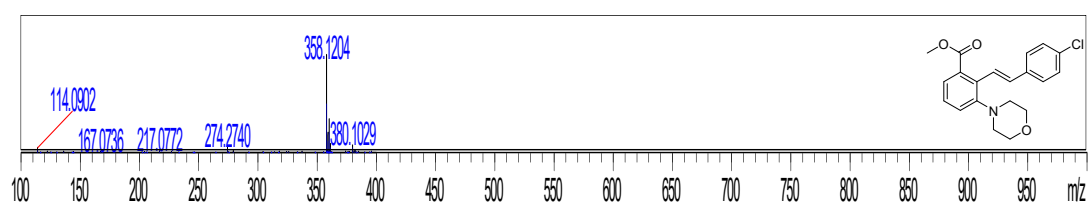

### HRMS of 4aj

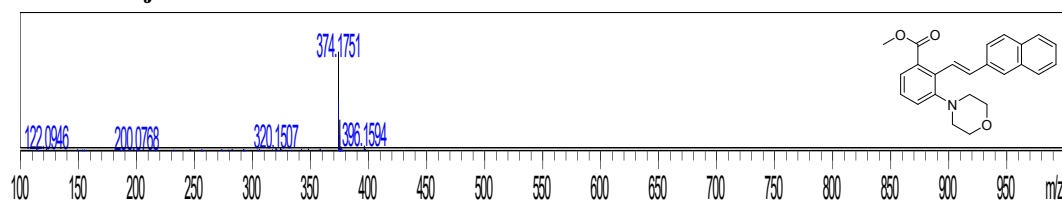

# HRMS of 4ak

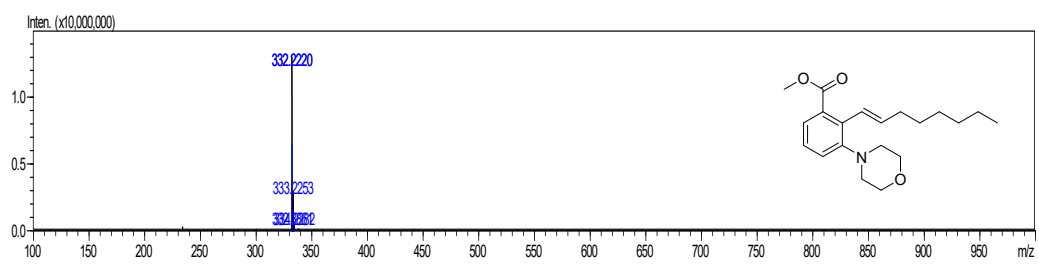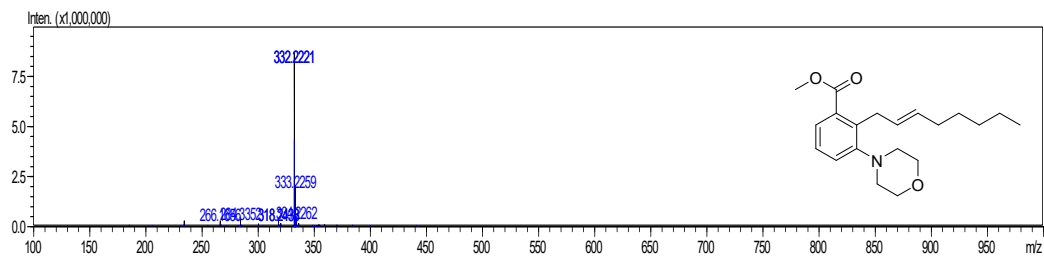

### GC-MS of 4a

质谱

流路号:1 保留时间:19.555(扫描数:3312)  
质量峰:146  
原始模式:平均 18.785-19.780(3158-3357) 基峰:72(20652)  
背景模式:19.755(3352) 组 1 - 事件 1 Scan

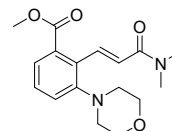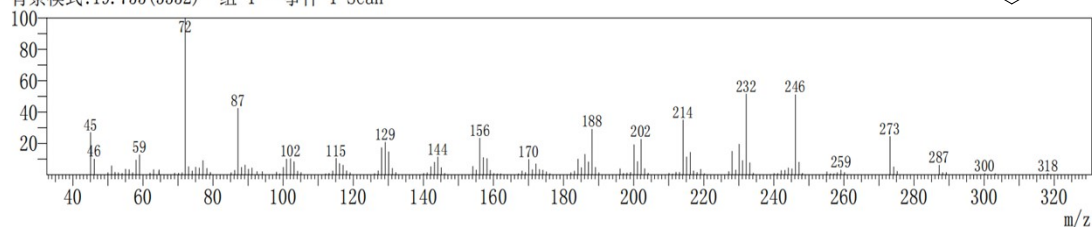

### GC-MS of 4b

质谱

流路号:1 保留时间:16.345(扫描数:2670)  
质量峰:79  
原始模式:平均 16.290-16.375(2659-2676) 基峰:202(145074)  
背景模式:无 组 1 - 事件 1 Scan

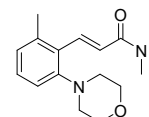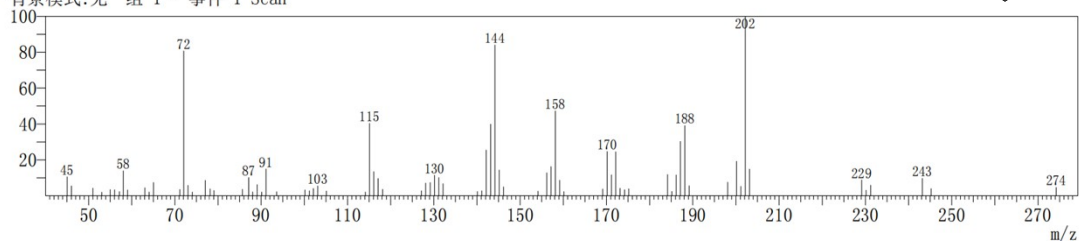

### GC-MS of 4c

质谱

流路号:1 保留时间:17.925(扫描数:2986)  
质量峰:81  
原始模式:平均 17.040-18.895(2809-3180) 基峰:216(42719)  
背景模式:无 组 1 - 事件 1 Scan

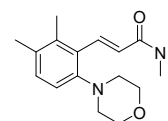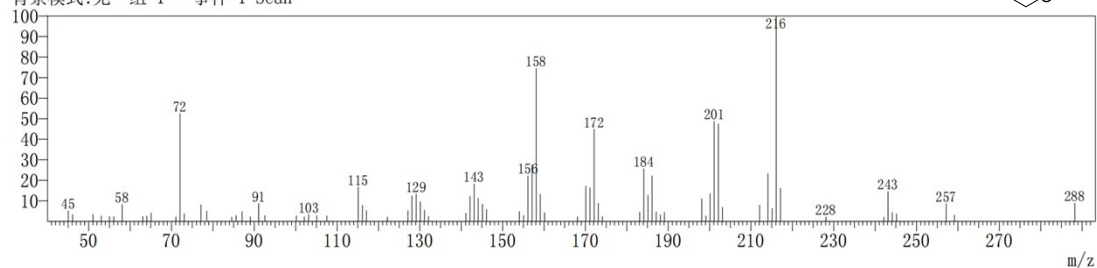



### GC-MS of 4d

质谱

流路号:1 保留时间:17.505(扫描数:2902)  
质量峰:68  
原始模式:平均 16.850-17.900(2771-2981) 基峰:216(86826)  
背景模式:无 组 1 - 事件 1 Scan

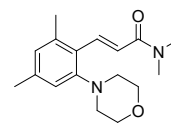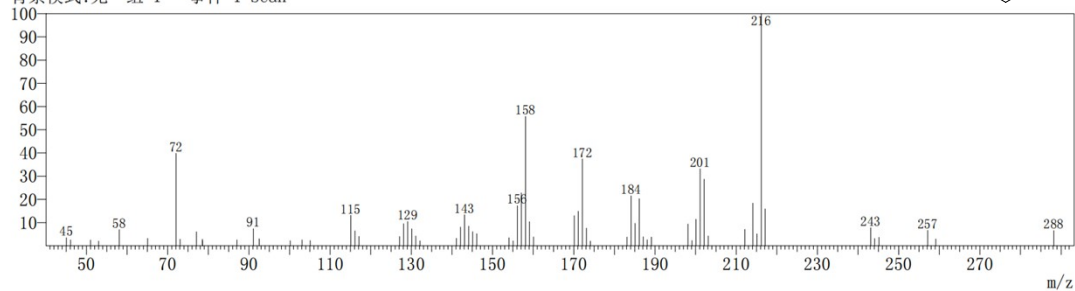

### GC-MS of 4e

质谱

流路号:1 保留时间:20.475(扫描数:3496)  
质量峰:149  
原始模式:平均 20.350-20.495(3471-3500) 基峰:72(195973)  
背景模式:无 组 1 - 事件 1 Scan

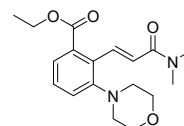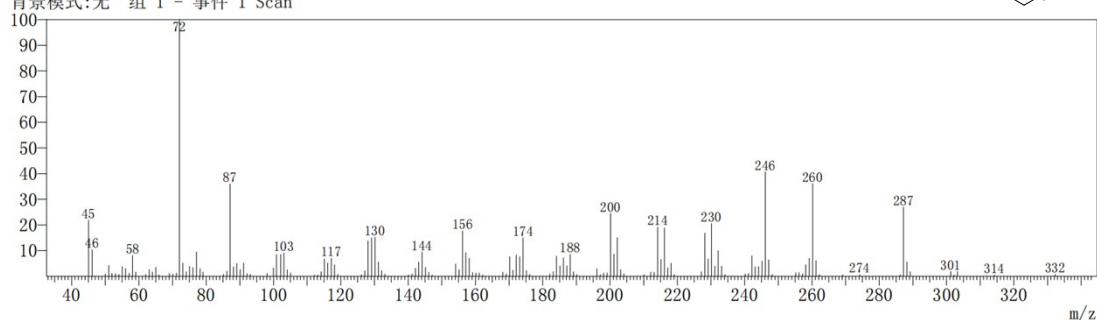

### GC-MS of 4f

质谱

流路号:1 保留时间:20.620(扫描数:3525)  
质量峰:123  
原始模式:平均 20.270-20.770(3455-3555) 基峰:72(232661)  
背景模式:20.945(3590) 组 1 - 事件 1 Scan

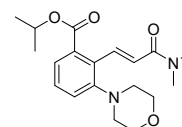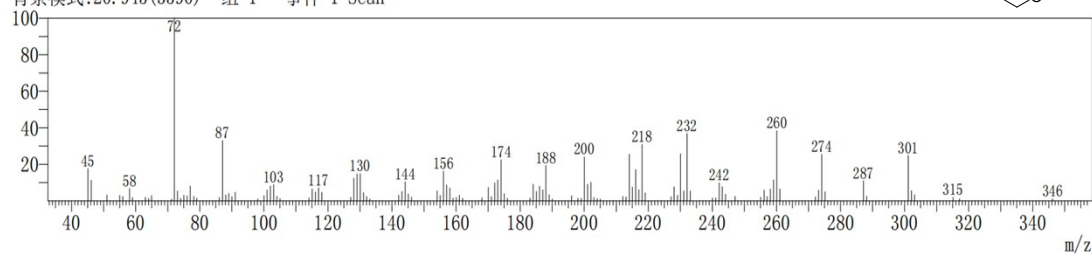

## GC-MS of 4g

质谱

流路号:1 保留时间:21.425(扫描数:3686)  
质量峰:115  
原始模式:平均 21.315-21.455(3664-3692) 基峰:72(113459)  
背景模式:无 组 1 - 事件 1 Scan

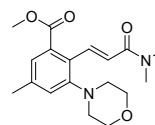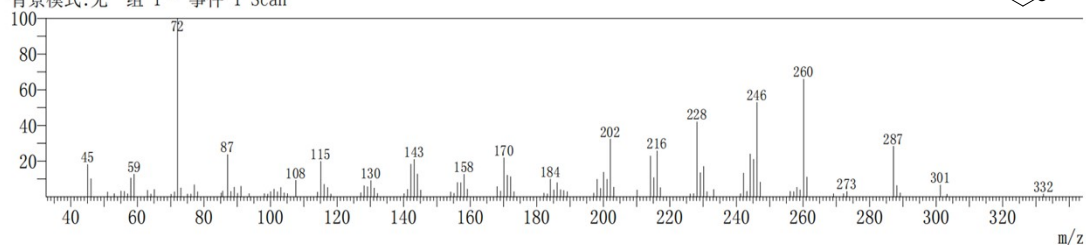

## GC-MS of 4h

质谱

流路号:1 保留时间:24.880(扫描数:4377)  
质量峰:101  
原始模式:平均 24.600-25.015(4321-4404) 基峰:72(32525)  
背景模式:25.120(4425) 组 1 - 事件 1 Scan

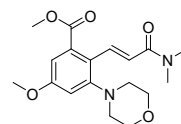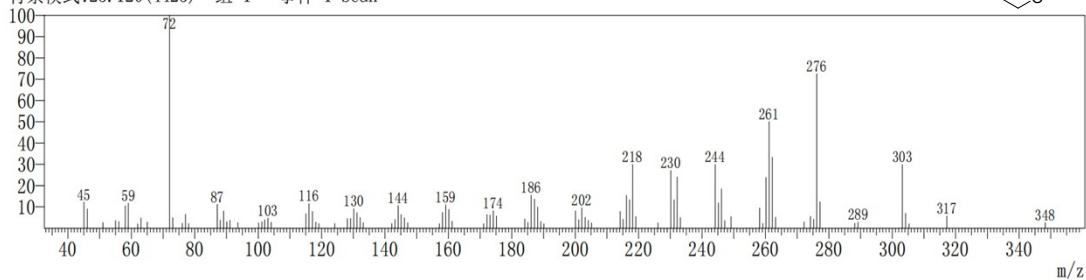

## GC-MS of 4i

质谱

流路号:1 保留时间:26.720(扫描数:4745)  
质量峰:136  
原始模式:平均 26.510-26.775(4703-4756) 基峰:72(72181)  
背景模式:26.505(4702) 组 1 - 事件 1 Scan

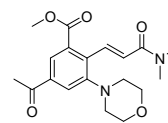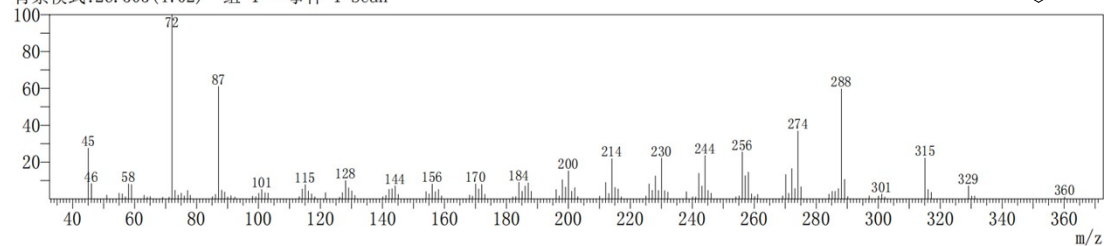

### GC-MS of 4j

质谱

流路号:1 保留时间:27.545(扫描数:4910)  
质量峰:152  
原始模式:平均 27.425-27.590(4886-4919) 基峰:72(329836)  
背景模式:27.360(4873) 组 1 - 事件 1 Scan

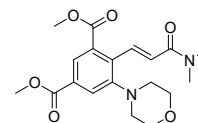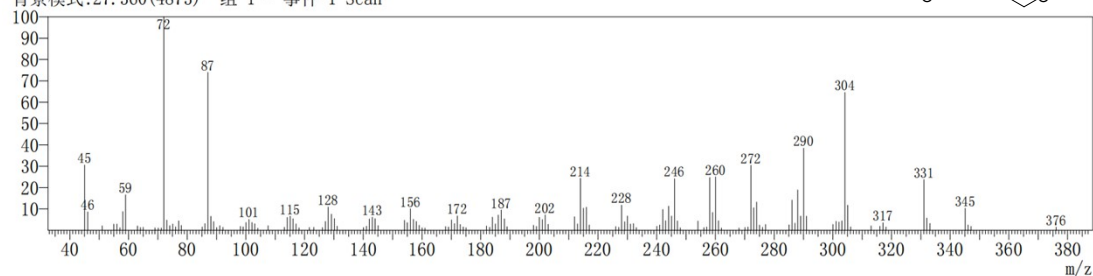

### GC-MS of 4k

质谱

流路号:1 保留时间:18.520(扫描数:3105)  
质量峰:129  
原始模式:平均 18.220-18.895(3045-3180) 基峰:72(43510)  
背景模式:19.080(3217) 组 1 - 事件 1 Scan

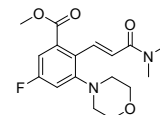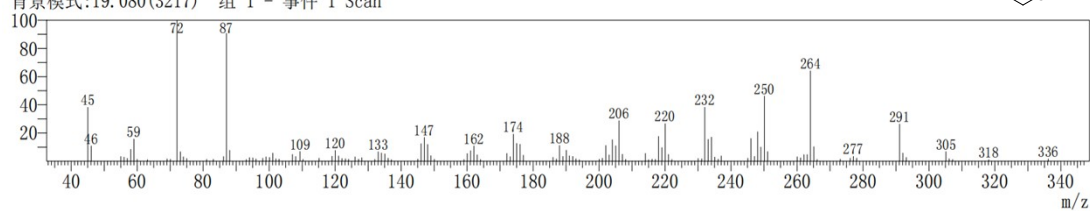

### GC-MS of 4m

质谱

流路号:1 保留时间:25.210(扫描数:4443)  
质量峰:77  
原始模式:平均 25.055-25.365(4412-4474) 基峰:264(88780)  
背景模式:无 组 1 - 事件 1 Scan

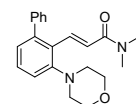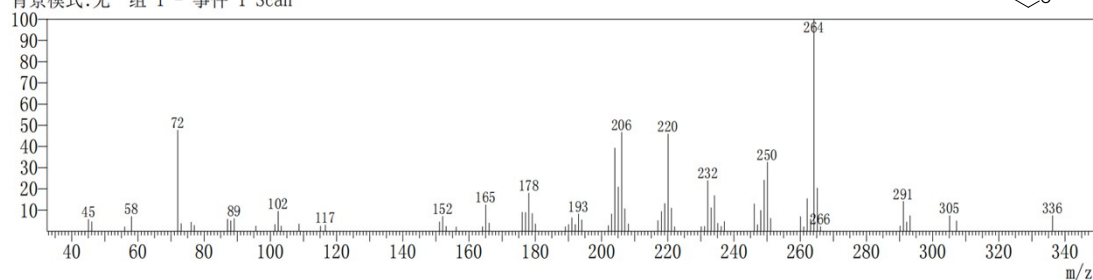

### GC-MS of 4n

质谱

流路号:1 保留时间:25.755(扫描数:4552)  
质量峰:76  
原始模式:平均 24.970-26.345(4395-4670) 基峰:238(69847)  
背景模式:无 组 1 - 事件 1 Scan

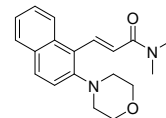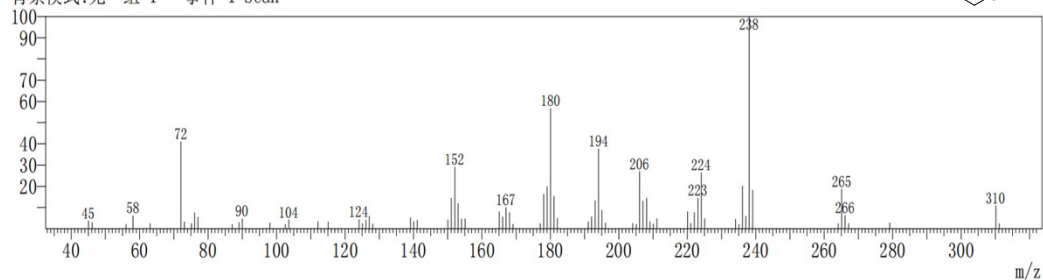

### GC-MS of 4p

质谱

流路号:1 保留时间:19.140(扫描数:3229)  
质量峰:97  
原始模式:平均 18.250-19.565(3051-3314) 基峰:228(17451)  
背景模式:无 组 1 - 事件 1 Scan

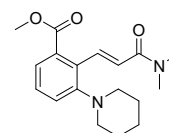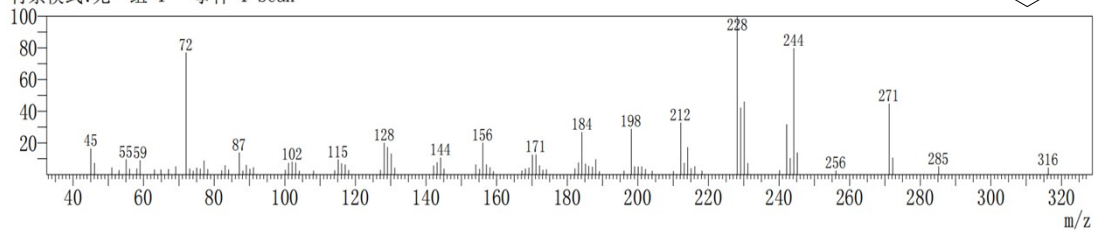

### GC-MS of 4q

质谱

流路号:1 保留时间:19.800(扫描数:3361)  
质量峰:125  
原始模式:平均 19.405-21.205(3282-3642) 基峰:242(7603)  
背景模式:无 组 1 - 事件 1 Scan

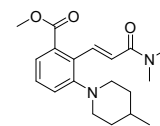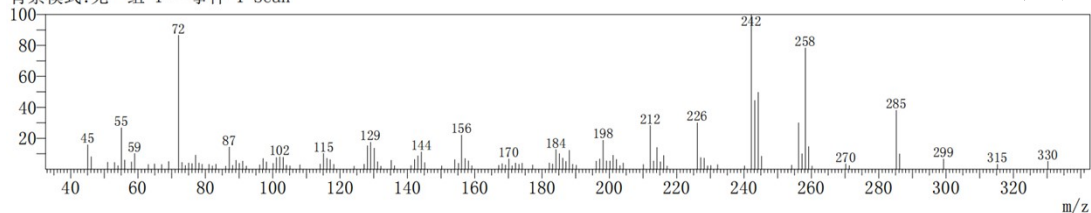

## GC-MS of 4s

质谱

流路号:1 保留时间:34.540(扫描数:6309)  
质量峰:110  
原始模式:平均 33.930-34.950(6187-6391) 基峰:72(17521)  
背景模式:无 组 1 - 事件 1 Scan

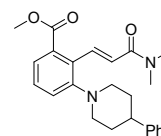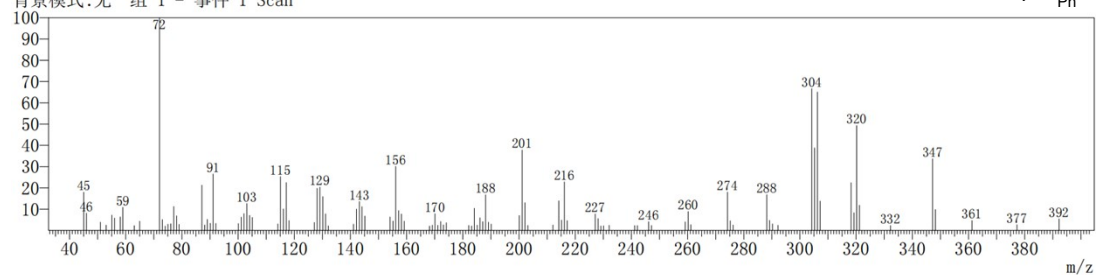

## GC-MS of 4z

质谱

流路号:1 保留时间:21.090(扫描数:3619)  
质量峰:140  
原始模式:平均 19.940-22.175(3389-3836) 基峰:100(40137)  
背景模式:无 组 1 - 事件 1 Scan

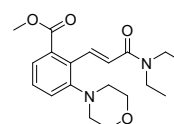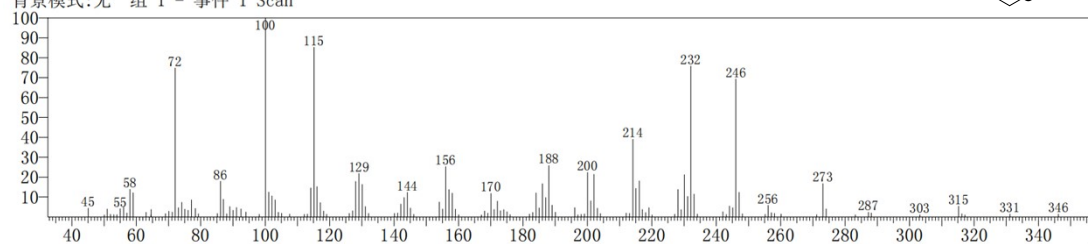

## GC-MS of 4aa

质谱

流路号:1 保留时间:26.695(扫描数:4740)  
质量峰:116  
原始模式:平均 26.455-26.710(4692-4743) 基峰:232(64929)  
背景模式:无 组 1 - 事件 1 Scan

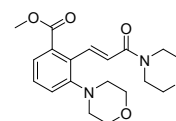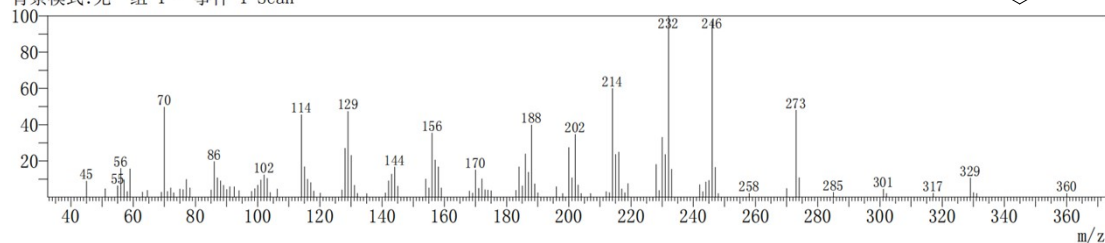

## GC-MS of 4ab

质谱

流路号:1 保留时间:15.490(扫描数:2499)  
质量峰:81  
原始模式:平均 15.045-15.960(2410-2593) 基峰:188(162205)  
背景模式:无 组 1 - 事件 1 Scan

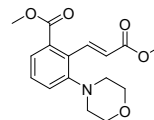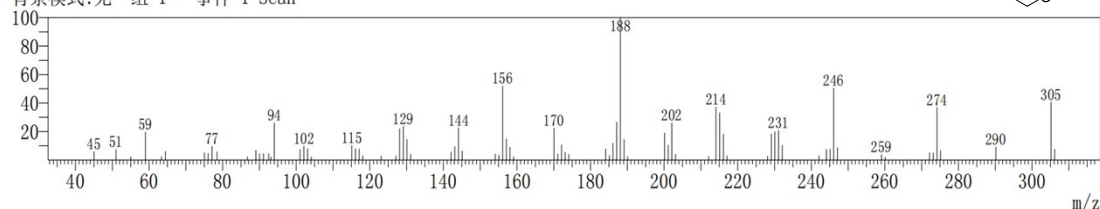

## GC-MS of 4ac

质谱

流路号:1 保留时间:16.055(扫描数:2612)  
质量峰:94  
原始模式:平均 15.975-16.260(2596-2653) 基峰:188(104140)  
背景模式:无 组 1 - 事件 1 Scan

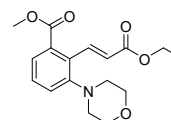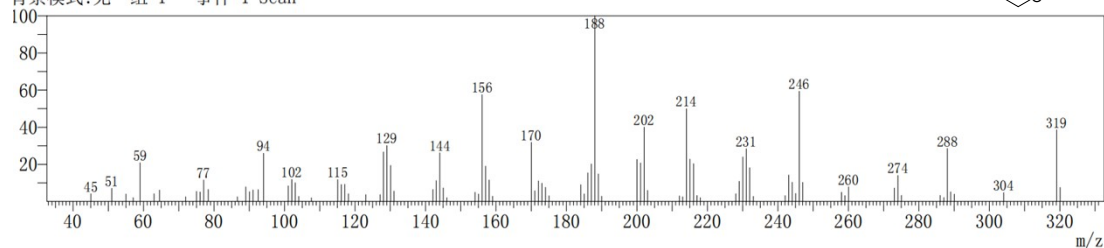

## GC-MS of 4ad

质谱

流路号:1 保留时间:16.595(扫描数:2720)  
质量峰:95  
原始模式:平均 16.310-17.040(2663-2809) 基峰:246(26780)  
背景模式:无 组 1 - 事件 1 Scan

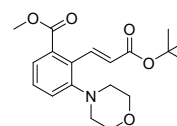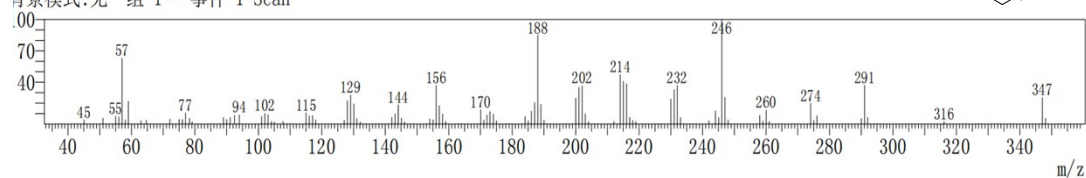

### GC-MS of 4ae

质谱

流路号:1 保留时间:14.995(扫描数:2400)  
质量峰:106  
原始模式:平均 14.780-15.560(2357-2513) 基峰:272(22317)  
背景模式:无 组 1 - 事件 1 Scan

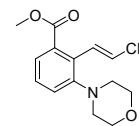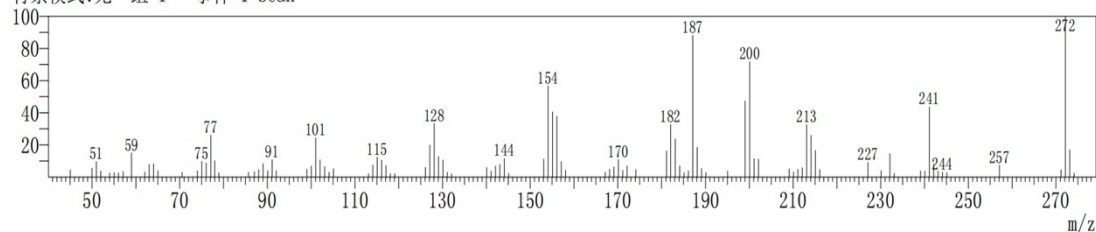

### GC-MS of 4af

质谱

流路号:1 保留时间:24.645(扫描数:4330)  
质量峰:176  
原始模式:平均 24.460-24.810(4293-4363) 基峰:188(75436)  
背景模式:无 组 1 - 事件 1 Scan

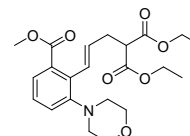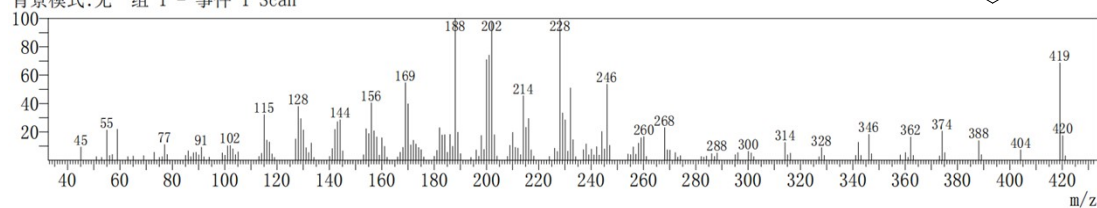

### GC-MS of 4ag

质谱

流路号:1 保留时间:19.830(扫描数:3367)  
质量峰:82  
原始模式:平均 19.245-20.290(3250-3459) 基峰:323(40539)  
背景模式:无 组 1 - 事件 1 Scan

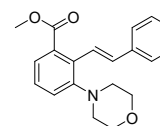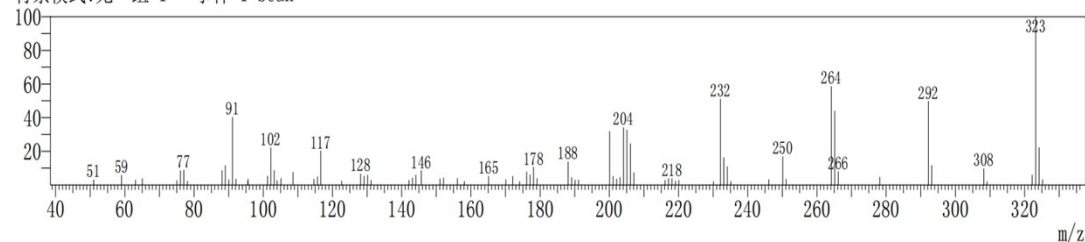



### GC-MS of 4ah

质谱

流路号:1 保留时间:21.060(扫描数:3613)  
质量峰:90  
原始模式:平均 20.830-21.285(3567-3658) 基峰:337(25817)  
背景模式:无 组 1 - 事件 1 Scan

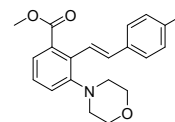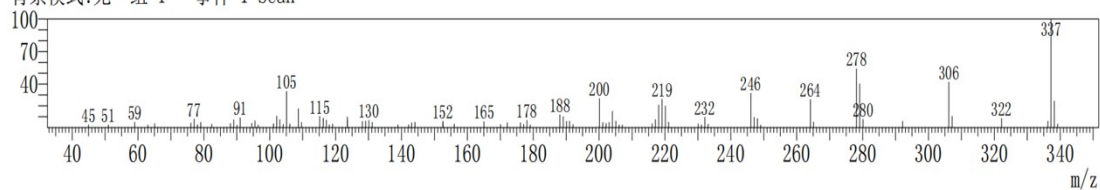

### GC-MS of 4ai

质谱

流路号:1 保留时间:24.150(扫描数:4231)  
质量峰:187  
原始模式:平均 23.495-24.405(4100-4282) 基峰:357(3344)  
背景模式:无 组 1 - 事件 1 Scan

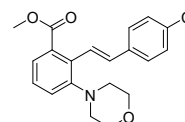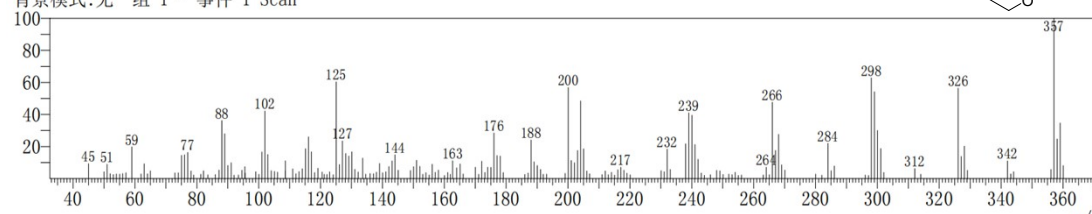

### GC-MS of 4aj

质谱

流路号:1 保留时间:32.830(扫描数:5967)  
质量峰:111  
原始模式:平均 32.555-33.200(5912-6041) 基峰:373(9809)  
背景模式:无 组 1 - 事件 1 Scan

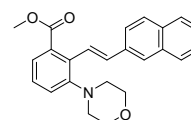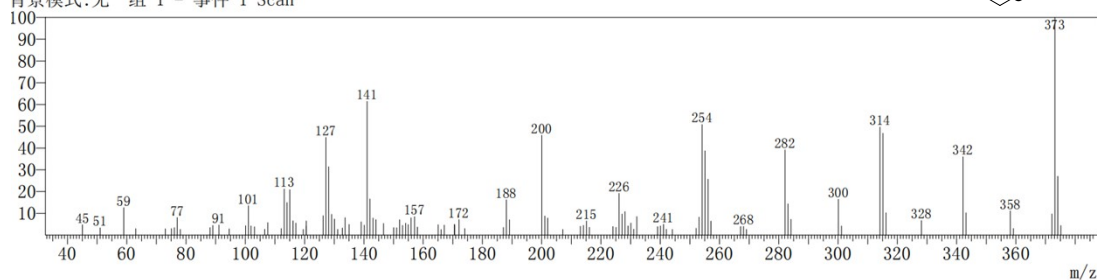



## GC-MS of 4y

质谱

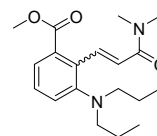

流路号:1 保留时间:16.625(扫描数:2726)  
质量峰:54  
原始模式:平均 16.545-16.660(2710-2733) 基峰:72(86014)  
背景模式:16.690(2739) 组 1 - 事件 1 Scan

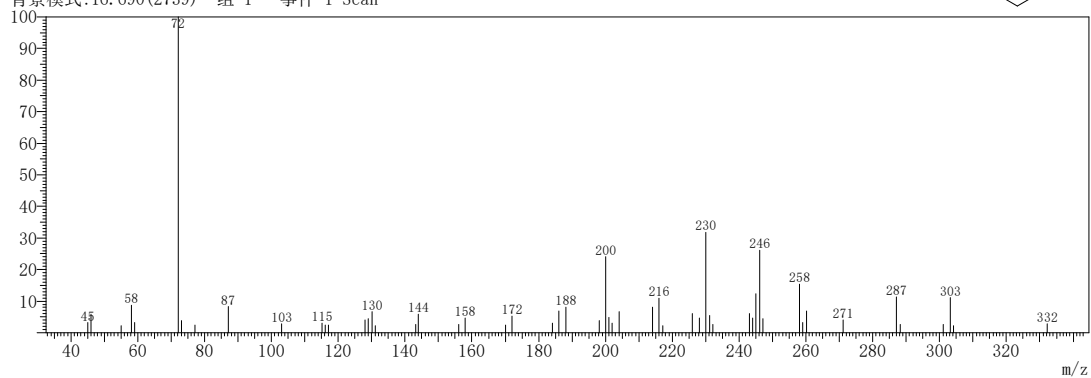

色谱图 D:\张翔\底物拓展\正二丙胺N-OBZ. qgd

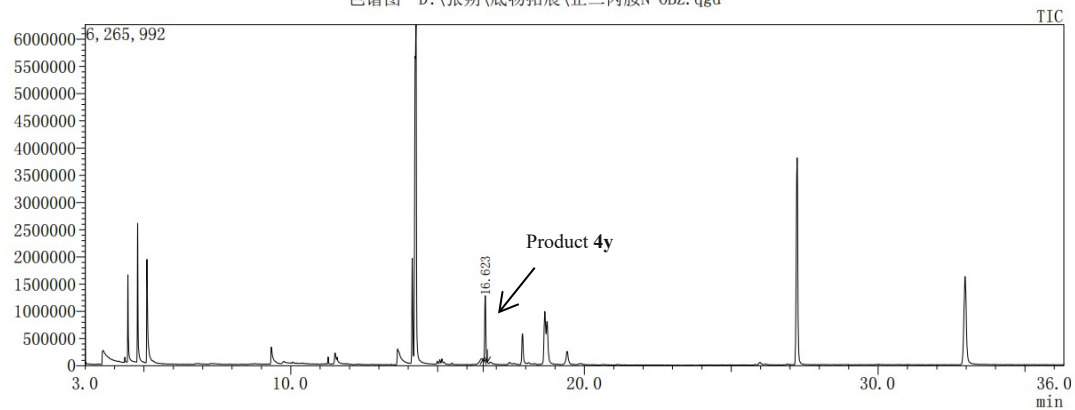

## HRMS of 4y

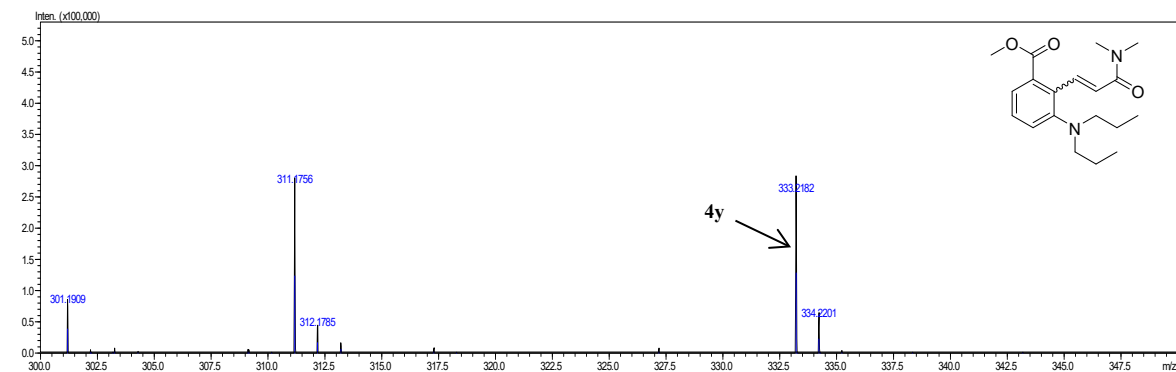

# GC-MS of 4ak

质谱

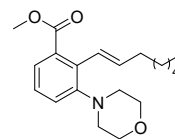

流路号:1 保留时间:16.525(扫描数:2706)  
质量峰:76  
原始模式:平均 16.320-16.680(2665-2737) 基峰:188(23413)  
背景模式:16.435(2688) 组 1 - 事件 1 Scan

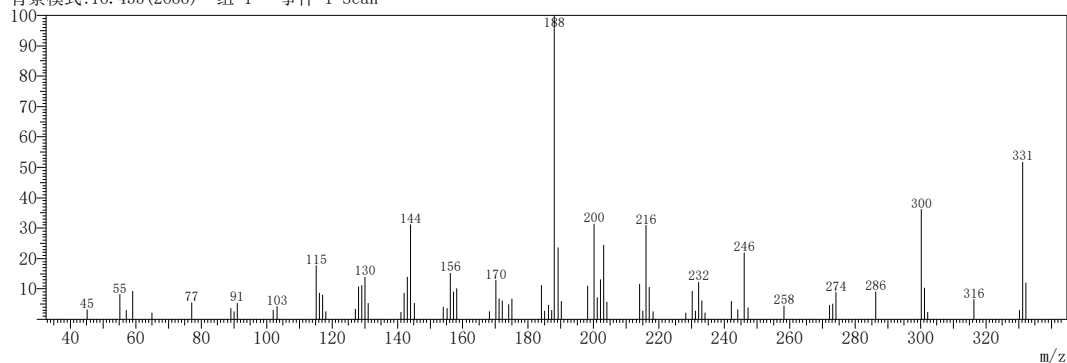

质谱

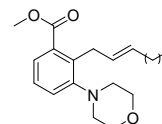

流路号:1 保留时间:15.775(扫描数:2556)  
质量峰:120  
原始模式:平均 15.735-15.820(2548-2565) 基峰:188(60828)  
背景模式:15.700(2541) 组 1 - 事件 1 Scan

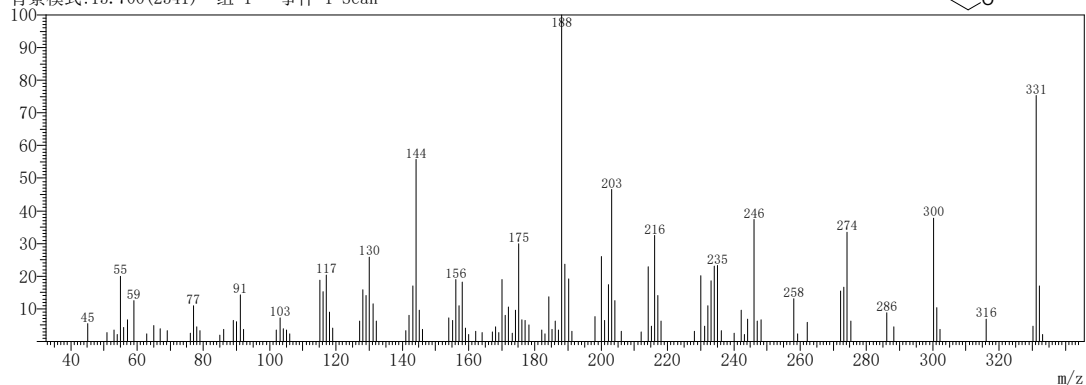

- [1] L.-J. Goossen, C. Linder, N. Rodríguez and P.-P. Lange, *Chemistry - A European Journal* 2009, **15**, 9336-9349.
- [2] a) A.-J. Biloski and B. Ganem, *Synthesis* 1983, **1983**, 537-538. b) Z. Dong, G. Lu, J. Wang, P. Liu and G. Dong, *J Am Chem Soc* 2018, **140**, 8551-8562.
- [3] Z. Zhu, Y. Gong, W. Tong, W. Xue and H. Gong, *Org Lett* 2021, **23**, 2158-2163.
- [4] V. Dimakos, D.-P. Canterbury, S. Monfette, P.-C. Roosen and S.-G. Newman, *ACS Catalysis* 2022, **12**, 11557-11562.
- [5] P. Yu, B. Morandi, *Angew Chem Int Ed Engl* 2017, **56**, 15693-15697.
- [6] A. Picado, S. Li and R.-K. Dieter, *J Org Chem* 2016, **81**, 1391-1400.
- [7] J. W. Chang, E. Y. Chia, C. L. Chai and J. Seayad, *Org Biomol Chem* 2012, **10**, 2289-2299.
- [8] T. Morack, J.-B. Metternich and R. Gilmour, *Org Lett* 2018, **20**, 1316-1319.
- [9] R. Y. Liu, J.-M. Dennis and S.-L. Buchwald, *J Am Chem Soc* 2020, **142**, 4500-4507.
- [10] X. Du, P.-J. Dransfield, D. C. Lin, S. Wong and Y. Wang, *ACS Med Chem Lett* 2014, **5**, 384-389.
- [11] A. R. Kizhakkayil Mangadan, J. Liu and A. Aponick, *Angew Chem Int Ed Engl* 2021, **60**, 22224-22229.
- [12] T. Taeufer, J. Pospech, *J Org Chem* 2020, **85**, 7097-7111.
- [13] B. Perez-Saavedra, A. Velasco-Rubio, E. Rivera-Chao, J.-A. Varela, C. Saa and M. Fananas-Mastral, *J Am Chem Soc* 2022, **144**, 16206-16216.
- [14] J. L. Wang, M. L. Liu, J. Y. Zou, W. H. Sun and X. Y. Liu, *Org Lett* 2022, **24**, 309-313.
- [15] Z. Zhang, B. S. Zhang, K. L. Li, Y. An, C. Liu, X. Y. Gou and Y. M. Liang, *J Org Chem* 2020, **85**, 7817-7839.
- [16] Z. Wang, M.-Y. Han, P. Li and L. Wang, *European Journal of Organic Chemistry* 2018, **2018**, 5954-5960.
- [17] W. Lv, Y. Chen, S. Wen, D. Ba and G. Cheng, *J Am Chem Soc* 2020, **142**, 14864-14870.
- [18] Y. Yuan, F. Zhao and X. F. Wu, *Chem Sci* 2021, **12**, 12676-12681.
