# Supplementary material for: Palladium-catalyzed and norbornene-mediated C–H amination and C–O alkenylation of aryl triflates
Source: Royal Society of Chemistry journal article supplement (doi:10.1039/d3ob00260h), 2023-01-01
Supplement: d3ob00260h2.xlsx [file d3ob00260h2.xlsx]

## Sheet: 4a
[MS Spectrum]
# of Peaks	69
Raw Spectrum	[1.290],(scan:[517])
Background Spectrum	No Background Spectrum
Base Peak	m/z 191.0918 (Inten : 4,230,323)
m/z	Abs. Inten.	Rel. Inten.
106.031	39296	0.93
107.04	1578407	37.31
107.131	19584	0.46
107.239	13056	0.31
108.042	32768	0.77
109.039	78720	1.86
123.016	22912	0.54
138.068	13056	0.31
139.063	13056	0.31
146.057	32768	0.77
154.051	39168	0.93
154.549	13056	0.31
156.079	16320	0.39
168.1	19584	0.46
169.11	992913	23.47
169.228	13056	0.31
170.115	59072	1.4
171.106	68864	1.63
180.094	16320	0.39
181.093	13056	0.31
184.067	13056	0.31
186.055	13056	0.31
188.084	178380	4.22
189.076	13056	0.31
190.086	157760	3.73
190.945	13056	0.31
190.978	13056	0.31
191.092	4230323	100	1
191.212	154689	3.66	7
191.295	73833	1.75
191.355	110464	2.61	7
191.506	62650	1.48	7
191.698	13056	0.31
192.093	297385	7.03	1
193.088	469713	11.1	1
194.09	16320	0.39
196.073	49088	1.16
197.07	13056	0.31
214.084	32768	0.77
218.077	13056	0.31
221.084	13056	0.31
230.081	134491	3.18
231.085	35904	0.85
237.15	124736	2.95	1
238.148	13056	0.31	1
239.149	49088	1.16	1
246.112	88640	2.1
247.116	19584	0.46
259.148	13056	0.31
263.113	52352	1.24
271.088	13056	0.31
274.107	197150	4.66
275.118	16320	0.39
287.137	72128	1.71
319.165	2647681	62.59	1
319.323	104168	2.46	10
319.425	13056	0.31	10
319.508	69602	1.65	10
319.707	26112	0.62
320.169	671183	15.87	1
321.174	65600	1.55	1
340.928	13056	0.31
341.148	1244164	29.41
341.307	13056	0.31
341.503	16320	0.39
342.149	221482	5.24
346.131	13056	0.31
349.185	13056	0.31
357.131	81173	1.92
Event	1

## Sheet: 4l
[MS Spectrum]
# of Peaks	60
Raw Spectrum	[4.120],(scan:[1649])
Background Spectrum	No Background Spectrum
Base Peak	m/z 353.1262 (Inten : 4,433,269)
m/z	Abs. Inten.	Rel. Inten.
107.042	13184	0.3
108.076	13184	0.3
116.989	13184	0.3
117.087	13184	0.3
133.049	13184	0.3
149.009	13184	0.3
154.063	19712	0.44
169.11	46080	1.04
178.042	13184	0.3
190.042	13184	0.3
206.03	13184	0.3
220.032	63562	1.43
222.015	13184	0.3
222.058	13184	0.3
234.032	13184	0.3
236.03	26368	0.59
248.046	72384	1.63
250.058	16448	0.37
256.266	13184	0.3
264.043	134976	3.04	1
265.053	13184	0.3	1
266.048	55936	1.26	1
278.049	13184	0.3
280.075	181062	4.08	1
281.075	13184	0.3	1
282.07	26304	0.59	1
282.285	13184	0.3
293.109	19776	0.45
308.071	181550	4.1	1
309.074	13184	0.3	1
310.067	49344	1.11	1
319.168	218270	4.92
320.176	19712	0.44
321.104	55936	1.26
323.105	13184	0.3
337.191	23040	0.52
352.915	13184	0.3
353.126	4433269	100	1
353.295	152595	3.44	1
353.411	85988	1.94
353.483	112308	2.53
353.707	108008	2.44
353.955	76310	1.72
354.028	13184	0.3
354.13	846731	19.1	1
354.289	13184	0.3	1
354.981	13184	0.3
355.126	1662177	37.49	1
355.296	19712	0.44	1
355.395	13184	0.3
355.485	26368	0.59
355.692	13184	0.3
356.127	344294	7.77	1
357.131	85988	1.94	1
372.093	13184	0.3
375.11	442412	9.98	1
376.106	55936	1.26	1
377.109	143899	3.25	1
391.084	52672	1.19
398.191	36160	0.82
Event	1

## Sheet: 4h
[MS Spectrum]
# of Peaks	73
Raw Spectrum	[1.150],(scan:[461])
Background Spectrum	No Background Spectrum
Base Peak	m/z 349.1755 (Inten : 4,375,309)
m/z	Abs. Inten.	Rel. Inten.
104.03	13184	0.3
107.04	706272	16.14
107.185	13184	0.3
108.037	13184	0.3
109.036	23040	0.53
117.082	32896	0.75
123.013	13184	0.3
144.084	13184	0.3
146.06	78976	1.81	2
146.554	13184	0.3	2
147.057	13184	0.3	2
154.045	13184	0.3
168.101	158855	3.63
169.109	3386964	77.41	1
169.225	119012	2.72
169.298	42816	0.98
169.356	93268	2.13
169.499	63562	1.45
169.676	13184	0.3
170.112	216082	4.94	1
171.107	328207	7.5	1
174.089	19712	0.45
186.055	19712	0.45
186.087	13184	0.3
188.084	209911	4.8	2
188.582	16448	0.38	2
189.085	49408	1.13	2
190.085	72448	1.66
190.971	13184	0.3
191.092	1758335	40.19	1
191.214	23040	0.53	7
191.361	13184	0.3	7
191.5	13184	0.3	7
191.526	13184	0.3
192.093	98752	2.26	1
193.088	151424	3.46	1
194.098	13184	0.3	1
194.924	13184	0.3
195.564	13184	0.3
196.072	13184	0.3
202.081	13184	0.3
216.079	64720	1.48
217.077	26368	0.6
230.09	67709	1.55
232.101	13184	0.3
236.089	19712	0.45
242.084	13184	0.3
244.096	59328	1.36
246.112	13184	0.3
260.092	208704	4.77	1
261.096	13184	0.3	1
262.1	13184	0.3	1
274.115	32896	0.75
276.122	213858	4.89	1
277.119	13184	0.3	1
278.117	62592	1.43	1
304.119	356986	8.16	1
305.125	52608	1.2	1
306.127	13184	0.3	1
317.158	71555	1.64
348.926	32896	0.75
349.175	4375309	100	1
349.344	160339	3.66	5
349.452	88956	2.03
349.53	125412	2.87	5
349.75	114536	2.62	5
349.997	26368	0.6
350.18	956199	21.85	1
350.453	13184	0.3
350.73	13184	0.3
351.183	137371	3.14	1
371.158	276330	6.32
372.152	46144	1.05
Event	1

## Sheet: 4j
[MS Spectrum]
# of Peaks	69
Raw Spectrum	[2.620],(scan:[1049])
Background Spectrum	No Background Spectrum
Base Peak	m/z 377.1708 (Inten : 2,975,154)
m/z	Abs. Inten.	Rel. Inten.
107.039	75840	2.55
108.082	13184	0.44
116.983	16512	0.55
117.085	19776	0.66
149.014	23104	0.78
168.106	33024	1.11
169.011	13184	0.44
169.109	600886	20.2
170.111	13184	0.44
171.104	62656	2.11
171.147	13184	0.44
179.113	13184	0.44
181.048	26368	0.89
189.974	19776	0.66
191.091	69184	2.33
194.93	33024	1.11
201.037	33024	1.11
217.007	13184	0.44
219.184	16512	0.55
228.06	13184	0.44
244.064	13184	0.44
244.094	13184	0.44
245.094	13184	0.44
253.066	13184	0.44
258.073	13184	0.44
260.094	13184	0.44
272.092	46144	1.55
274.273	19840	0.67
276.126	13184	0.44
279.101	13184	0.44
284.294	13184	0.44
288.088	85696	2.88
292.123	13184	0.44
299.125	13184	0.44
301.119	13184	0.44
304.12	85696	2.88
305.142	33024	1.11
317.151	13184	0.44
318.298	16512	0.55
319.16	39552	1.33
321.125	26368	0.89
323.147	13184	0.44
332.117	108736	3.65
333.119	13184	0.44
337.194	124647	4.19
338.192	13184	0.44
338.341	19840	0.67
340.259	13184	0.44
340.77	13184	0.44
345.144	92883	3.12
349.177	462332	15.54	1
350.177	62656	2.11	1
351.177	13184	0.44	1
353.123	16512	0.55
376.879	13184	0.44
377.171	2975154	100	1
377.347	104153	3.5
377.47	36352	1.22
377.541	86227	2.9	4
377.779	77904	2.62	4
378.029	13184	0.44	4
378.174	672584	22.61	1
378.336	13184	0.44
379.18	88960	2.99	1
394.354	13184	0.44
396.138	13184	0.44
396.804	33024	1.11
397.298	13184	0.44
399.155	368341	12.38
Event	1

## Sheet: 4g
[MS Spectrum]
# of Peaks	74
Raw Spectrum	[3.790],(scan:[1517])
Background Spectrum	No Background Spectrum
Base Peak	m/z 333.1810 (Inten : 3,652,224)
m/z	Abs. Inten.	Rel. Inten.
107.04	548473	15.02
107.338	13312	0.36
108.042	13312	0.36
109.037	19840	0.54
115.055	13312	0.36
123.01	19904	0.54
128.063	19840	0.54
141.052	13312	0.36
143.072	13312	0.36
146.057	19840	0.54
154.057	13312	0.36
155.036	13312	0.36
155.072	13312	0.36
157.088	13312	0.36
168.105	56256	1.54
169.11	1315937	36.03
169.228	19840	0.54
169.297	13312	0.36
169.365	13312	0.36
170.107	108928	2.98	1
171.105	148288	4.06	1
172.072	13312	0.36
172.103	13312	0.36	1
180.092	13312	0.36
188.086	95331	2.61
188.577	13312	0.36
189.076	13312	0.36
190.087	62848	1.72
191.093	1284441	35.17	1
191.214	16576	0.45
191.354	13312	0.36
192.095	85760	2.35	1
193.088	105600	2.89	1
196.068	19904	0.54
198.096	13312	0.36	1
199.092	13312	0.36	1
200.094	99687	2.73	1
214.077	13312	0.36
216.107	13312	0.36
226.074	13312	0.36
228.101	85824	2.35
230.117	19904	0.54
244.099	151600	4.15	1
245.101	13312	0.36	1
246.112	13312	0.36	1
258.119	13312	0.36
260.129	125312	3.43
261.128	23168	0.63
270.118	23168	0.63
273.153	36416	1
274.273	13312	0.36
288.124	225451	6.17
289.128	13312	0.36
301.154	99008	2.71
302.155	13312	0.36
333.181	3652224	100	1
333.342	141685	3.88
333.448	69123	1.89
333.522	116917	3.2
333.742	115173	3.15
333.982	33152	0.91
334.185	839876	23	1
334.349	13312	0.36
335.188	95744	2.62	1
349.174	178071	4.88
350.176	33152	0.91
352.153	13312	0.36
355.163	913754	25.02
355.323	13312	0.36
356.168	186052	5.09
371.139	122298	3.35	1
372.149	13312	0.36	1
373.144	13312	0.36	1
378.234	26624	0.73
Event	1

## Sheet: 4e
[MS Spectrum]
# of Peaks	55
Raw Spectrum	[1.680],(scan:[673])
Background Spectrum	No Background Spectrum
Base Peak	m/z 333.1808 (Inten : 2,429,479)
m/z	Abs. Inten.	Rel. Inten.
107.04	184236	7.58
108.081	16640	0.68
117.085	36352	1.5
146.057	13312	0.55
164.988	13312	0.55
168.106	52992	2.18
169.011	33280	1.37
169.06	13312	0.55
169.109	1237110	50.92	1
169.222	33280	1.37
170.111	110291	4.54	1
171.107	160557	6.61	1
177.087	13312	0.55
181.048	13312	0.55
188.082	69376	2.86
188.59	13312	0.55
190.088	13312	0.55
191.092	319365	13.15
192.095	13312	0.55
193.082	13312	0.55
201.037	19968	0.82
217.007	13312	0.55
219.009	13312	0.55
219.186	13312	0.55
228.096	19968	0.82
230.105	13312	0.55
244.1	23232	0.96
253.065	69440	2.86
260.131	69440	2.86
269.04	26496	1.09
270.12	23232	0.96
271.033	13312	0.55
279.101	13312	0.55
287.134	19968	0.82
288.124	99008	4.08
299.127	26496	1.09
301.155	52928	2.18
302.147	13312	0.55
305.152	16640	0.68
319.168	23232	0.96
321.159	13312	0.55
323.139	33024	1.36
333.181	2429479	100	1
333.348	86634	3.57	10
333.441	33280	1.37	10
333.529	39936	1.64	10
333.72	26624	1.1
334.184	522080	21.49	1
334.349	13312	0.55
335.182	90557	3.73	1
349.177	69440	2.86
350.176	19968	0.82
355.164	532706	21.93
356.172	112435	4.63
392.252	13312	0.55
Event	1

## Sheet: 4b
[MS Spectrum]
# of Peaks	79
Raw Spectrum	[2.680],(scan:[1073])
Background Spectrum	No Background Spectrum
Base Peak	m/z 169.1095 (Inten : 5,821,351)
m/z	Abs. Inten.	Rel. Inten.
104.031	16704	0.29
107.04	449409	7.72
108.042	13440	0.23
108.081	16704	0.29
109.037	16704	0.29
112.013	13440	0.23
115.055	13440	0.23
117.085	26560	0.46
120.045	13440	0.23
123.013	19968	0.34
136.017	13440	0.23
138.067	16704	0.29
142.069	13440	0.23
145.555	19968	0.34
146.058	459422	7.89
146.564	16704	0.29
147.057	33408	0.57
153.547	16704	0.29
154.045	258572	4.44	2
154.543	19968	0.34	2
155.042	39808	0.68	2
156.037	13440	0.23
168.102	192380	3.3
169.109	5821351	100	1
169.225	222428	3.82
169.3	96083	1.65
169.354	149241	2.56
169.499	106768	1.83
169.545	46592	0.8
169.676	64153	1.1
169.831	13440	0.23
170.111	482602	8.29	1
171.107	645428	11.09	1
171.228	13440	0.23
172.11	19968	0.34
173.102	16704	0.29
180.095	102528	1.76
181.092	23296	0.4
186.093	132160	2.27
187.092	13440	0.23
187.578	23296	0.4
188.083	729039	12.52	2
188.584	39808	0.68	2
189.082	134682	2.31	2
189.58	16704	0.29	2
190.086	66368	1.14	2
190.128	13440	0.23
191.091	1111733	19.1	1
191.209	13440	0.23
191.5	13440	0.23
192.094	63104	1.08	1
193.088	76160	1.31	1
195.071	13440	0.23
195.569	26560	0.46
196.07	263680	4.53	2
196.572	20032	0.34	2
197.069	59456	1.02	2
197.567	16704	0.29	2
198.064	23296	0.4
200.104	13440	0.23
202.123	56512	0.97
204.108	13440	0.23
230.117	252059	4.33
231.113	46592	0.8
270.114	13440	0.23
275.175	2294215	39.41	1
275.319	56448	0.97	6
275.42	13440	0.23
275.485	57625	0.99	6
275.666	26880	0.46	6
276.178	453001	7.78	1
277.183	23296	0.4	1
287.134	13440	0.23
297.149	16704	0.29
298.061	13440	0.23
321.142	13440	0.23
333.18	267382	4.59
334.183	33152	0.57
355.161	13440	0.23
Event	1

## Sheet: 4i
[MS Spectrum]
# of Peaks	87
Raw Spectrum	[3.900],(scan:[1562])
Background Spectrum	No Background Spectrum
Base Peak	m/z 333.1816 (Inten : 2,342,111)
m/z	Abs. Inten.	Rel. Inten.
301.155	70144	2.99
304.117	13696	0.58
305.144	37376	1.6
309.125	40576	1.73
316.114	13696	0.58
317.149	50432	2.15
319.168	30144	1.29
321.057	13696	0.58
321.111	53696	2.29
321.141	57024	2.43
323.143	73472	3.14
324.152	13696	0.58
326.089	13696	0.58
329.152	106432	4.54
330.154	20352	0.87
333.182	2342111	100	1
333.34	53696	2.29	5
333.45	13696	0.58
333.522	72469	3.09	5
333.729	13696	0.58	5
333.982	13696	0.58
334.184	570370	24.35	1
335.174	191831	8.19	1
336.167	13696	0.58
337.128	37376	1.6
337.183	13696	0.58
338.341	13696	0.58
339.122	17024	0.73
341.149	13696	0.58
343.127	20352	0.87
345.135	53760	2.3
347.145	13696	0.58
347.18	13696	0.58
349.176	186975	7.98
350.183	17024	0.73
353.127	76800	3.28
355.163	1495765	63.86
355.325	37376	1.6
355.521	13696	0.58
356.166	344707	14.72
357.149	91017	3.89
358.144	23616	1.01
361.059	17024	0.73
361.176	818186	34.93	1
361.342	13696	0.58
362.179	167552	7.15	1
363.186	58727	2.51	1
369.042	13696	0.58
371.044	13696	0.58
371.148	155884	6.66
372.149	13696	0.58
373.079	13696	0.58
374.175	89984	3.84
375.102	13696	0.58
375.176	13696	0.58
383.159	488779	20.87	1
384.161	109696	4.68	1
384.237	13696	0.58
385.173	13696	0.58	1
388.118	53696	2.29
389.111	17024	0.73
391.288	13696	0.58
392.261	13696	0.58
393.094	13696	0.58
399.135	17024	0.73
405.102	13696	0.58
415.069	13696	0.58
419.318	108868	4.65
420.319	13696	0.58
425.236	57024	2.43
426.232	13696	0.58
427.383	119552	5.1
428.384	33408	1.43
441.075	13696	0.58
441.298	43904	1.87
449.363	119705	5.11
450.36	17024	0.73
546.327	60416	2.58	1
547.309	13696	0.58	1
548.337	13696	0.58	1
551.272	50432	2.15
552.279	20352	0.87
687.343	148548	6.34
688.353	20288	0.87
715.337	63680	2.72
716.331	13696	0.58
743.325	13696	0.58
Event	2

## Sheet: 4f
[MS Spectrum]
# of Peaks	70
Raw Spectrum	[0.720],(scan:[289])
Background Spectrum	No Background Spectrum
Base Peak	m/z 347.1965 (Inten : 6,264,835)
m/z	Abs. Inten.	Rel. Inten.
107.043	16512	0.26
115.052	19776	0.32
117.082	13184	0.21
128.052	13184	0.21
130.064	13184	0.21
142.063	13184	0.21	1
143.072	13184	0.21	1
144.079	19840	0.32	1
154.068	16512	0.26
156.084	19840	0.32
158.1	16512	0.26
167.074	13184	0.21
169.11	125184	2
171.103	13184	0.21
172.078	13184	0.21
174.057	13184	0.21
174.089	13184	0.21
186.055	13184	0.21
186.088	36288	0.58
188.073	13184	0.21
200.069	16512	0.26
204.067	13184	0.21
214.089	128512	2.05
215.084	19840	0.32
216.075	308601	4.93
217.063	13184	0.21
218.084	26368	0.42
219.08	13184	0.21
230.083	13184	0.21
232.096	230494	3.68
233.106	13184	0.21
243.11	13184	0.21
258.113	16512	0.26
259.145	59328	0.95
260.094	122257	1.95
260.148	13184	0.21
274.281	13184	0.21
275.175	13184	0.21
277.127	13184	0.21
282.277	13184	0.21
287.14	273167	4.36
288.14	49536	0.79
302.143	69184	1.1
305.151	186237	2.97
306.152	13184	0.21
319.169	19840	0.32
333.187	23104	0.37
334.192	13184	0.21
346.842	13184	0.21
346.913	13184	0.21
347.197	6264835	100	1
347.363	227774	3.64
347.471	141200	2.25
347.542	177572	2.83	4
347.769	165972	2.65	4
348.033	162273	2.59	4
348.201	1553520	24.8	1
348.373	26368	0.42	10
348.471	13184	0.21	10
348.516	13184	0.21
348.587	13184	0.21	10
348.766	13184	0.21
349.204	229137	3.66	1
350.212	33024	0.53	1
366.177	19840	0.32
369.178	398999	6.37
370.18	72448	1.16
374.152	16512	0.26
385.152	135077	2.16
386.158	13184	0.21
Event	1

## Sheet: 4c
[MS Spectrum]
# of Peaks	85
Raw Spectrum	[2.320],(scan:[929])
Background Spectrum	No Background Spectrum
Base Peak	m/z 191.0920 (Inten : 4,330,422)
m/z	Abs. Inten.	Rel. Inten.
106.036	19712	0.46
107.04	2278668	52.62
107.134	52672	1.22	9
107.19	13184	0.3
107.236	29632	0.68	9
107.352	29632	0.68	9
108.043	69056	1.59
109.038	105280	2.43
123.014	82304	1.9
125.012	13184	0.3
128.066	19776	0.46
139.067	16448	0.38
141.063	13184	0.3
142.063	13184	0.3
145.083	13184	0.3
146.058	131584	3.04	2
146.559	13184	0.3	2
147.057	13184	0.3	2
154.05	98124	2.27
156.079	29632	0.68	1
157.093	16448	0.38	1
158.09	16448	0.38	1
168.106	13184	0.3
169.11	663443	15.32
170.104	42816	0.99	1
171.106	75168	1.74	1
172.11	32896	0.76	1
180.093	29632	0.68
181.093	13184	0.3
186.12	13184	0.3
188.084	214821	4.96	2
188.584	13184	0.3	2
189.081	26304	0.61	2
190.085	239450	5.53	1
191.092	4330422	100	1
191.217	153917	3.55	7
191.295	84784	1.96
191.355	104624	2.42	7
191.506	67709	1.56	7
191.698	13184	0.3
192.042	13184	0.3
192.093	319467	7.38	1
193.086	478586	11.05	1
194.924	13184	0.3
195.084	13184	0.3
196.071	49344	1.14	1
197.07	13184	0.3	1
198.069	13184	0.3	1
200.107	342599	7.91	1
201.111	36160	0.84	1
202.122	13184	0.3	1
214.124	19776	0.46
215.112	13184	0.3
216.137	69120	1.6
217.148	13184	0.3
218.117	59200	1.37
219.122	19712	0.46
230.112	19712	0.46
237.154	13184	0.3
244.133	202136	4.67
245.137	36160	0.84
260.132	19712	0.46
278.998	13184	0.3
288.917	13184	0.3
288.974	51536	1.19
289.191	2951569	68.16	1
289.343	103884	2.4
289.443	16448	0.38
289.505	101352	2.34
289.705	51536	1.19
290.193	602429	13.91	1
291.195	55936	1.29	1
305.092	13184	0.3
305.185	875960	20.23
305.334	13184	0.3
306.19	182315	4.21
311.172	632861	14.61
312.176	148750	3.44
333.18	46080	1.06
347.198	32896	0.76
355.162	224082	5.17
356.162	16448	0.38
363.032	13184	0.3
369.172	62464	1.44
395.227	13184	0.3
Event	1

[truncated: 24 more sheets: 4d, 4m, 4k, 4n, 4o, 4q, 4s, 4r, 4x, 4v, 4w, 4t, 4u, 4p, 4ab, 4ac, 4ad, 4ae, 4ag, 4ai …]
